# Supplementary material for: Phosphasilene mediated CO activation and deoxygenative homo coupling of CO molecules in reactions with metal carbonyls
Source: Royal Society of Chemistry journal article supplement (doi:10.1039/d4sc05491a), 2024-01-01
Supplement: d4sc05491a1.pdf [file d4sc05491a1.pdf]

## Supplementary Information

# Phosphasilene Mediated CO Activation and Deoxygenative Homo Coupling of CO Molecules in Reactions with Metal Carbonyls

Zohreh Hendi<sup>[a]</sup>, Renuka Pardhan<sup>[b]</sup>, Katharina Rachuy<sup>[a]</sup>, Soheil Mahmoudi<sup>[c]</sup>, Madhusudan K. Pandey<sup>[a]</sup>, Saroj Kumar Kushvaha<sup>[a]</sup>, Regine Herbst-Irmer<sup>[a]</sup>, Upakarasamy Lourderaj<sup>[b]\*</sup>, Dietmar Stalke<sup>[a]\*</sup>, Herbert W. Roesky<sup>[a]\*</sup>

[a] Dr. Z. Hendi, K. Rachuy, Dr. M. K. Panday, Dr. S. K. Kushvaha, Dr. R. Herbst-Irmer, Prof. Dr. D. Stalke, Prof. Dr. H. W. Roesky

Institut für Anorganische Chemie

Georg-August-Universität Göttingen

Göttingen, 37077, Germany

E-mail: [hroesky@gwdg.de](mailto:hroesky@gwdg.de), [dstalke@chemie.uni-goettingen.de](mailto:dstalke@chemie.uni-goettingen.de)

[b] Dr. Renuka Pakdhan, Prof. Upakarasamy Lourderaj

School of Chemical Sciences,

National Institute of Science Education and Research (NISER) Bhubaneswar,

HBNI, Khurda, Odisha 752050, India

[c] S. Mahmoudi

Institute of Inorganic Chemistry, Faculty of Chemistry

University of Vienna

Währinger Strasse 42, 1090 Vienna (Austria).

University of Vienna, Vienna Doctoral School in Chemistry. (DoSChem), Waehringer Str. 42, 1090 Vienna, Austria

## Contents

---

|                                                         |          |
|---------------------------------------------------------|----------|
| I. General Information                                  | S3       |
| II. Synthesis and Characterization Data of <b>1 - 4</b> | S3–S40   |
| III. Characterization Data of the side product          | S40-46   |
| IV. Crystallographic Details for Compounds <b>1 - 4</b> | S47–S70  |
| V. Computational details                                | S71-S229 |
| VI. References                                          | S230     |

## EXPERIMENTAL SECTION

**General procedures.** All air and moisture-sensitive compounds were handled and stored in an MBRAUN Glove box under an atmosphere of high purity of N<sub>2</sub>. All manipulations were performed under an inert atmosphere of dry nitrogen or argon using standard Schlenk techniques. Commercial reagents were purchased from Sigma-Aldrich or TCI and used as received. Toluene and hexane were distilled over Na/K alloy (25: 75), and diethyl ether was distilled over potassium mirror. C<sub>6</sub>D<sub>6</sub> and fluorobenzene were dried by stirring for two days over Na/K alloy and CaH<sub>2</sub>, respectively. After three freeze-pump-thaw cycles for degassing, it was finally distilled and stored in the glove box. [Mes\*PH<sub>2</sub>] and [Mes\*P(TMS)<sub>2</sub>] were prepared according to the published procedures.<sup>1,2</sup> Other reagents were obtained from commercial sources and used after purification.

**Instrumentation.** The solution NMR spectra were recorded on Bruker FT spectrometers (Advance-400 or 500 MHz) at ambient probe temperatures. <sup>13</sup>C{<sup>1</sup>H} and <sup>29</sup>Si{<sup>1</sup>H} NMR spectra were acquired using the broadband decoupling method. The spectra were recorded in C<sub>6</sub>D<sub>6</sub> solutions with C<sub>6</sub>D<sub>6</sub> as an internal lock. Chemical shifts of <sup>1</sup>H and <sup>13</sup>C{<sup>1</sup>H} NMR spectra are reported in ppm downfield from TMS, used as an internal standard. Positive values indicate downfield shifts. LIFDI measurements were performed on a Joel AccuTOF spectrometer under an inert atmosphere.

## II. Synthesis and Characterization data of 1-2

### (A) Synthesis of Mes\*PSi(PhC(N<sup>i</sup>Bu)<sub>2</sub>)SiMe<sub>3</sub> (1).

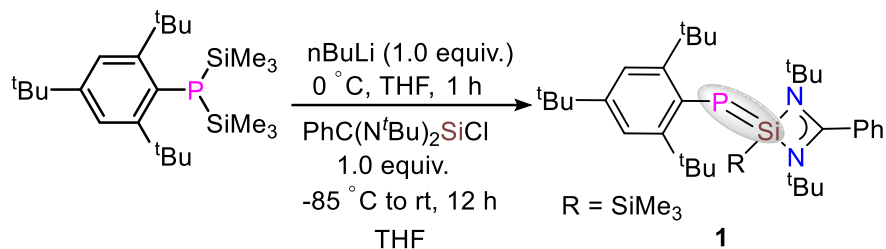

nBuLi (0.851 mL, 2.5 M in hexanes) was added dropwise to a solution of Mes\*P(TMS)<sub>2</sub> (900 mg, 2.12 mmol) in tetrahydrofuran (40 mL) at 0 °C and the reaction mixture was allowed to warm to room temperature in 1 hour. Following this, a solution of [(PhC(N<sup>t</sup>Bu)<sub>2</sub>SiCl] (625.2 mg, 2.12 mmol) in THF (30 mL) was added dropwise at -80 °C and the reaction mixture was allowed to come to room temperature and stirred for over-night. THF was slowly reduced under vacuum to give the crude product. 40 mL of freshly dried diethyl ether was transferred to the resulting precipitate by using cannula to separate the dissolved product from LiCl salt which was produced during the reaction. The reaction mixture was filtered using a P4 frit to remove LiCl. Diethyl ether was slowly reduced under *vacuo* to give the pure product. The orange crystals of **1** suitable for single crystal X-ray diffraction study were obtained from a concentrated diethyl ether solution of **1** at room temperature.

Yield 65 % (842 mg).

Another alternative approach of synthesis **1** was carried out using 1;1 molar ratio of Mes\*P(SiMe)<sub>3</sub> (900mg) and [(PhC(N<sup>t</sup>Bu)<sub>2</sub>SiCl] (625.2 mg) in a 100 mL RB flask, 40 mL freshly dried toluene was added to the flask, and it was heated at 80 °C for 8 hours. After cooling the reaction mixture to room temperature, the solvent was removed under vacuum and the product was washed with hexane. Yield 78% (1015 mg).

$^1\text{H}$  NMR (400 MHz,  $\text{C}_6\text{D}_6$ )  $\delta$  = 6.80 – 7.00 (m, 4H, ArH), 7.18 (t,  $J=1.57$  Hz, 1H, ArH), 7.48 (d,  $J=1.63$  Hz, 2H, ArH), 2.70 (s, 18H, –meta- $\text{C}(\text{CH}_3)_3$ ), 1.40 (s, 9H, para-  $\text{C}(\text{CH}_3)_3$ ), 0.93 (s, 18H, N- $^t\text{Bu}$ ), 0.49 (s, 9H,  $\text{SiMe}_3$ ).

$^{13}\text{C}$  NMR (400 MHz,  $\text{C}_6\text{D}_6$ )  $\delta$  = 170.49 (s), 155.28 (d,  $J=3.70$ ), 143.96 (s), 138.63 (d,  $J=91.64$ ), 131.62 (s), 129.88 (s), 128.47 (s), 120.33 (s), 65.54 (s), 53.94 (s), 38.82 (s), 34.22 (s), 33.95 (d,  $J=9.00$  Hz), 31.61 (s), 31.25 (s), 15.23 (s), 1.03 (d,  $J=5.84$ ).

$^{31}\text{P}\{^1\text{H}\}$  NMR (400 MHz,  $\text{C}_6\text{D}_6$ )  $\delta$  = -92.88 (s, with 2 silicone satellites,  $^1J_{\text{P}^-\text{Si}^+} = 240.16$  Hz,  $^2J_{\text{P}^-\text{Si}^+} = 55.14$  Hz )

$^{29}\text{Si}\{^1\text{H}\}$  NMR (400 MHz,  $\text{C}_6\text{D}_6$ )  $\delta$  = 16.59 (d,  $^1J_{\text{Si}^-\text{P}^+} = 240.16$  Hz), -15.11 (d,  $^2J_{\text{Si}^-\text{P}^+} = 55.14$  Hz)

MS (LIFDI, toluene):  $m/z$  for  $\text{C}_{36}\text{H}_{61}\text{N}_2\text{PSi}_2$  ( $\text{M}$ ) $^+$ : 608.5.

EA experimental (calculated): C 70.82 (71.00), H 10.22 (10.10), N 4.73 (4.60).

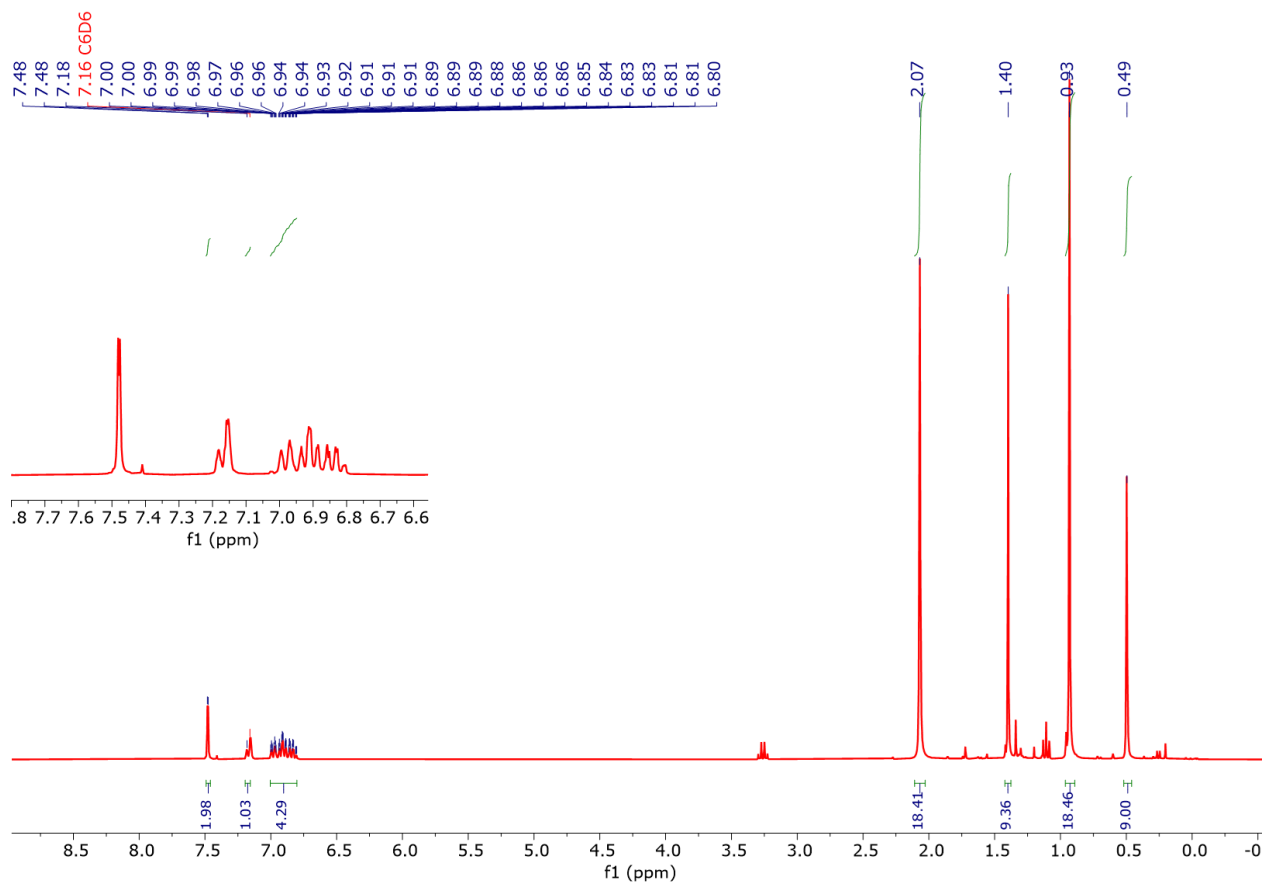

**Figure S1.**  $^1\text{H}$  NMR spectrum of **1** in  $\text{C}_6\text{D}_6$

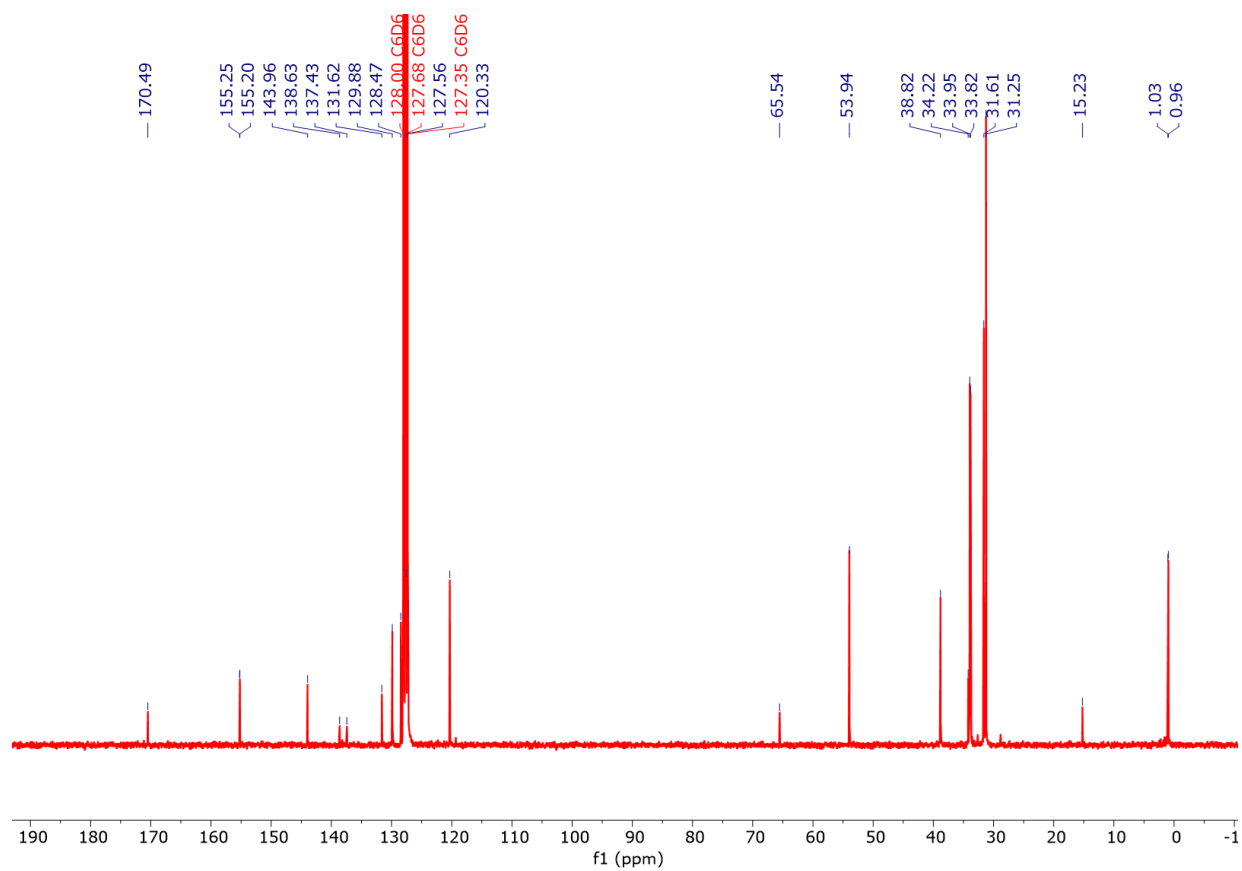

**Figure S2.**  $^{13}\text{C}$  NMR spectrum of **1** in  $\text{C}_6\text{D}_6$

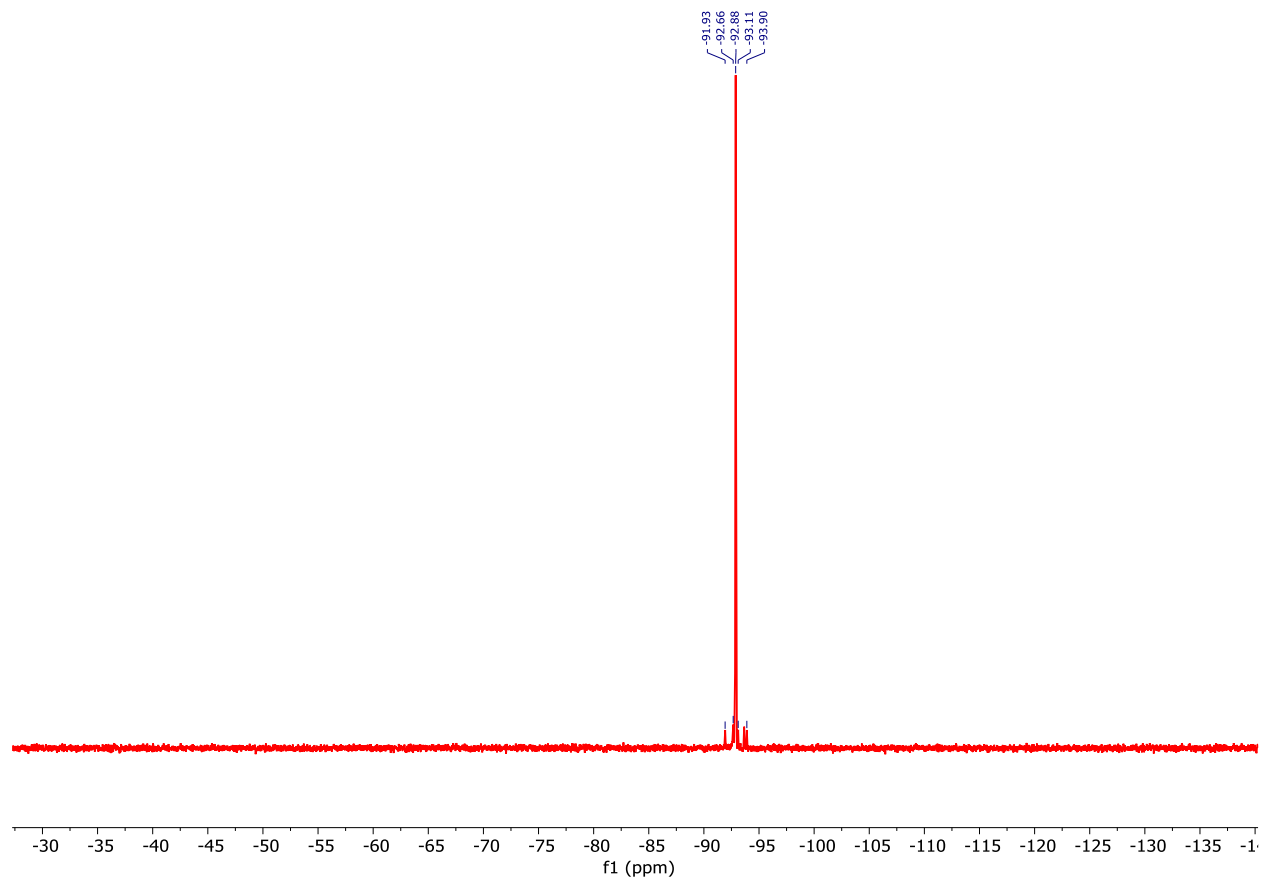

**Figure S3.**  $^{31}\text{P}\{^1\text{H}\}$  NMR spectrum of **1** in  $\text{C}_6\text{D}_6$



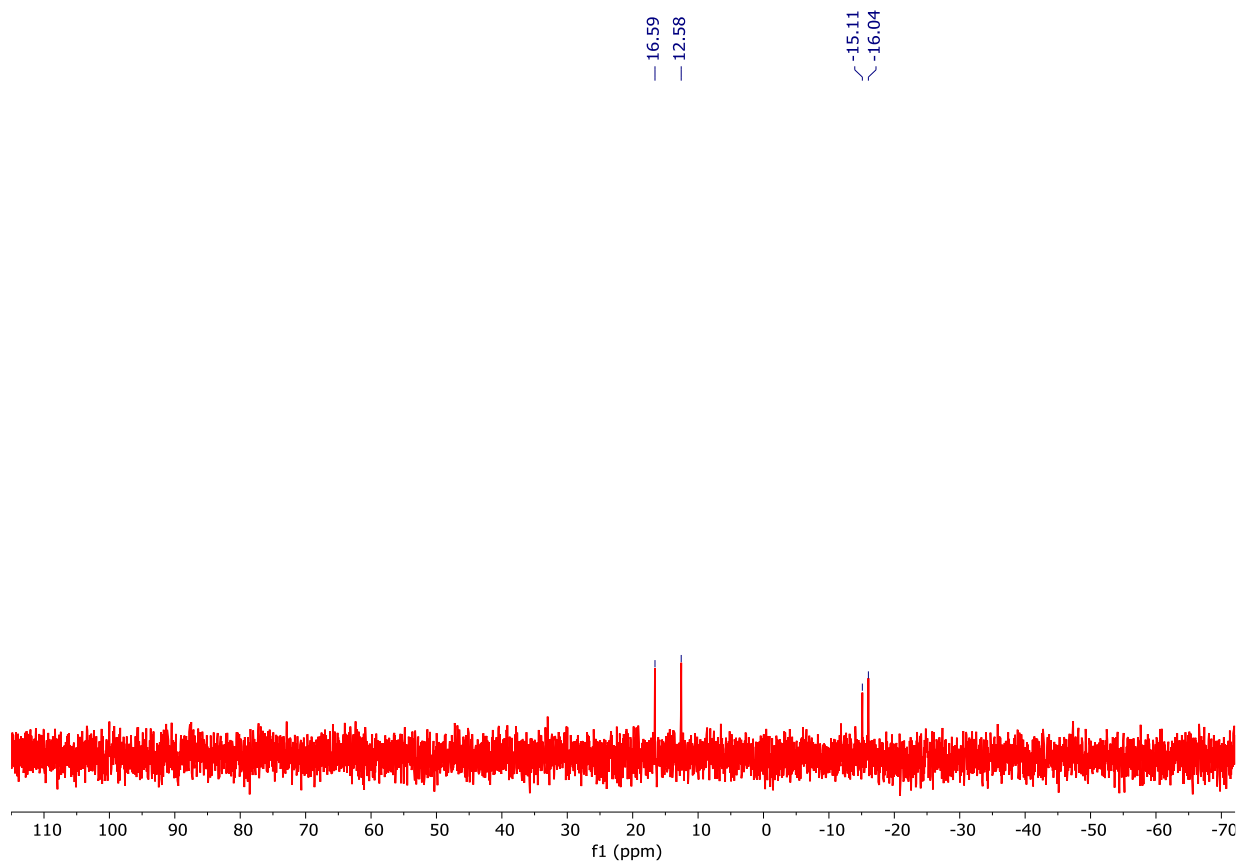

**Figure S4.**  $^{29}\text{Si}\{^1\text{H}\}$  NMR spectrum of **1** in  $\text{C}_6\text{D}_6$

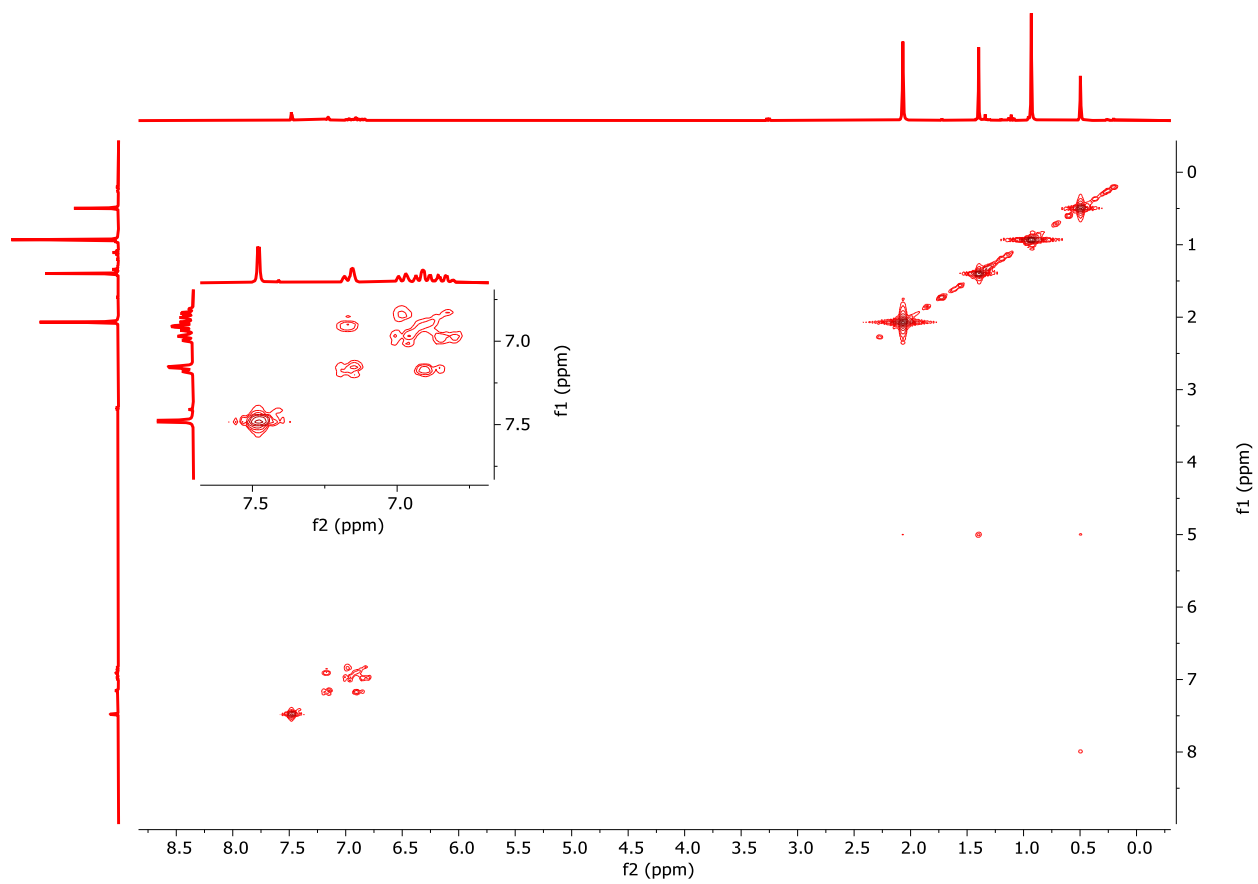

**Figure S5.** 2D  $^1\text{H}$ - $^1\text{H}$  COSY NMR spectrum of **1** in  $\text{C}_6\text{D}_6$

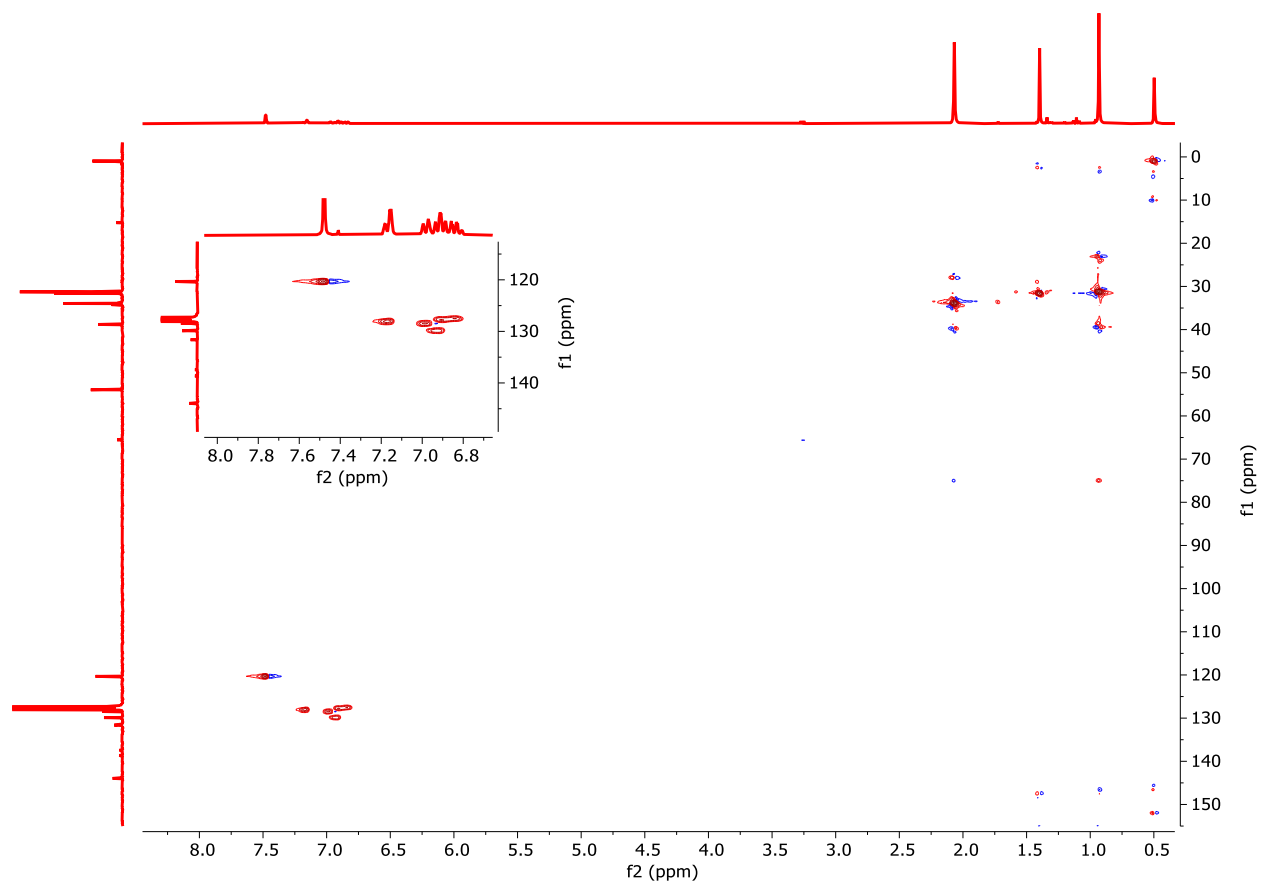

**Figure S6.** 2D  $^1\text{H}$ - $^{13}\text{C}$  HSQC NMR spectrum of **1** in  $\text{C}_6\text{D}_6$

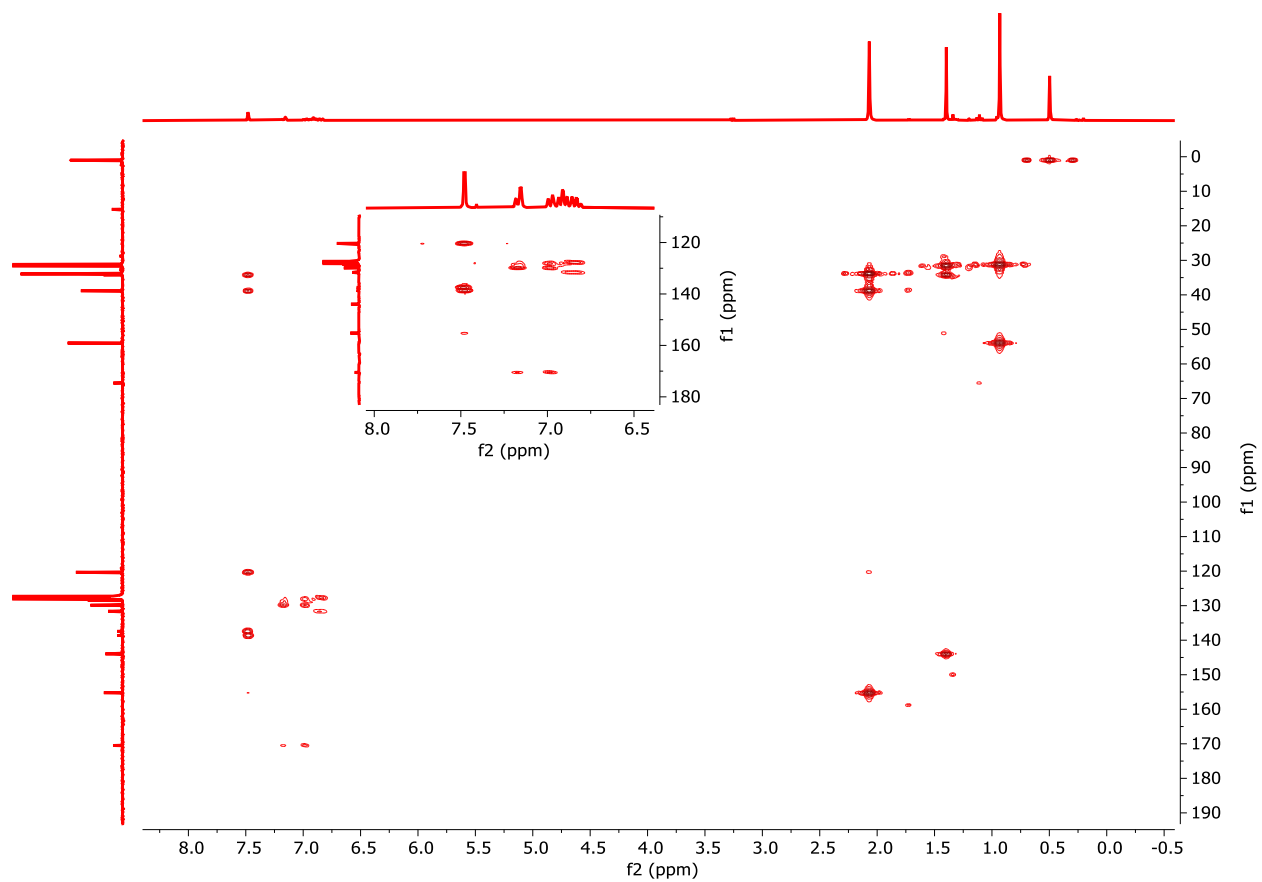

**Figure S7.** 2D  $^1\text{H}$ - $^{13}\text{C}$  HMBC NMR spectrum of **1** in  $\text{C}_6\text{D}_6$ .

(a)

Acq. Data Name: shendi00006  
Creation Parameters: Average(MS[1] Time:0.63..0.74)  
External Sample Id: ZH5

Experiment Date/Time: 5/24/2023 10:05:18 AM  
Ionization Mode: FD+

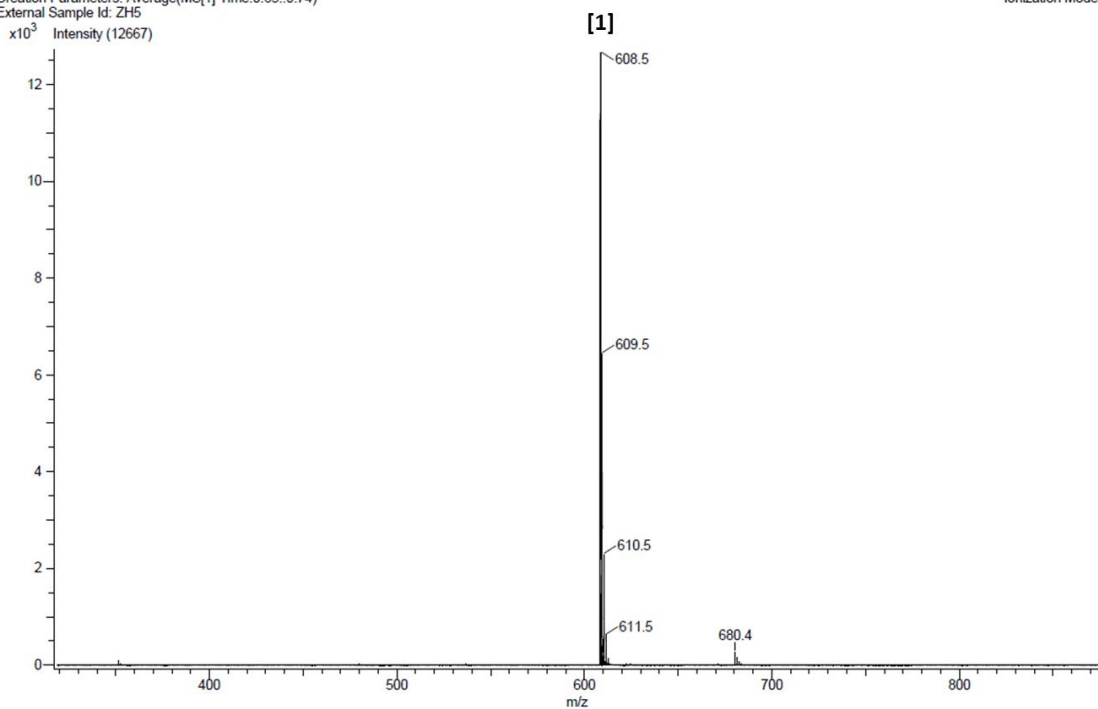

(b)

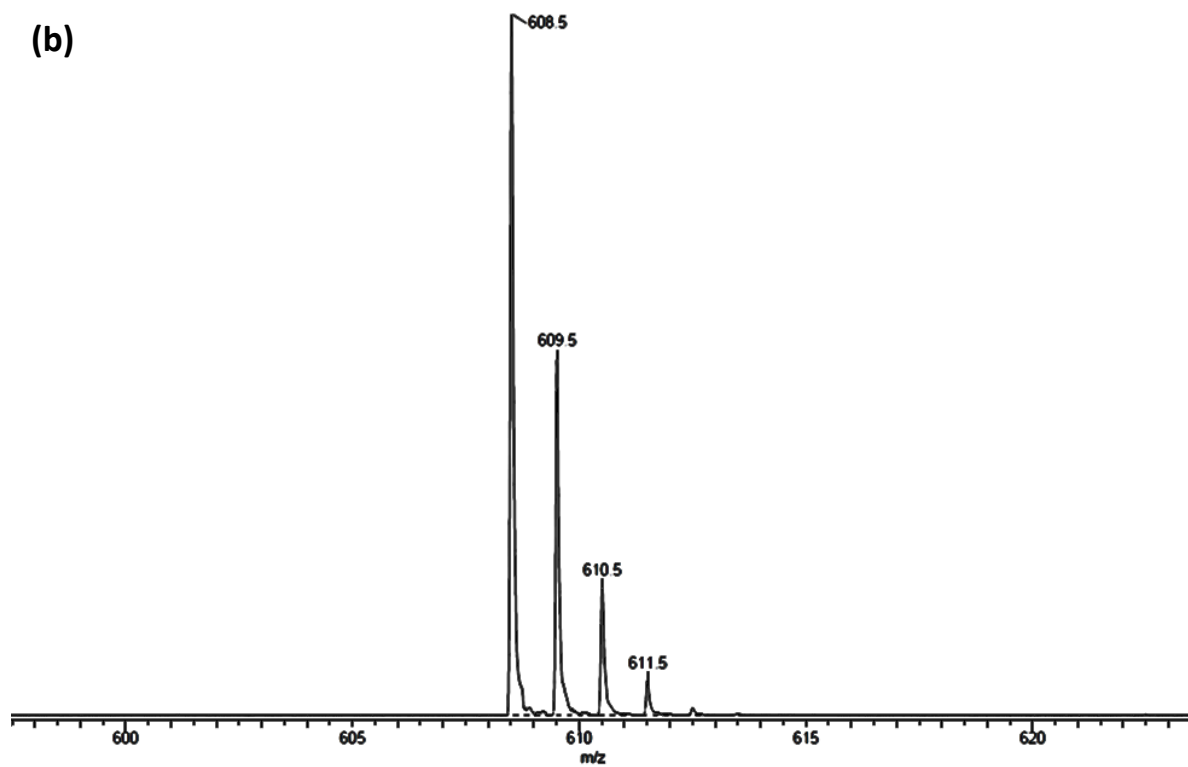

Figure S8: (a) LIFDI spectrum of (1), (b) expansion of the pattern.

**(B) Synthesis of (Mes\*P)<sub>2</sub>(CCO)FeSi(PhC(N<sup>t</sup>Bu)<sub>2</sub>)TMS (2).**

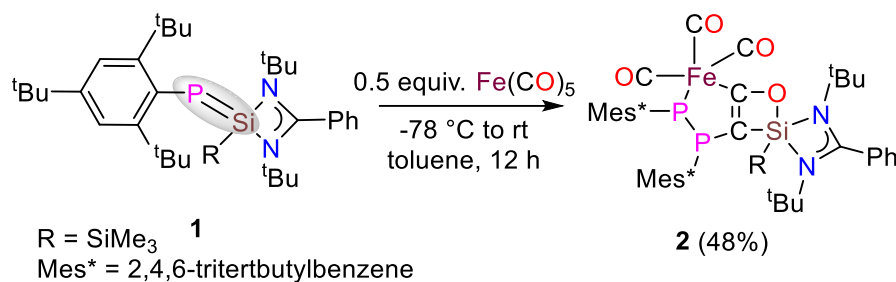

Fe(CO)<sub>5</sub> (45 μL, 0.82 mmol) was added dropwise to a solution of (**1**) (100 mg, 0.164 mmol) in toluene (30 mL) at 0 °C. The flask was sealed, and the reaction mixture was allowed to warm to room temperature and stirred for 24 hours which resulted in the formation of a dark green solution. After that, toluene was slowly reduced under a vacuum to give the crude product. 2-3 mL of dried hexane was added to the crude product and stored for 3 weeks at room temperature to afford green crystals of the desired compound (**2**). The experimental and calculated IR spectra of **2** is demonstrated in fig S17. According to the calculated IR spectrum the IR values for Fe(CO)<sub>3</sub> units are in the range of 2055-2109 cm<sup>-1</sup> and for C=C-O unit is about 1044 cm<sup>-1</sup> which are in agreement with the observed values in the experimental IR spectrum.

Yield 38 % (34 mg). mp 240-243 °C.

<sup>1</sup>H NMR (400 MHz, C<sub>6</sub>D<sub>6</sub>) δ = 7.74 (s, 1H, m-PMes\*H), 7.63 (s, 1H, m-PMes\*H), 7.53 (s, 1H, m-PMes\*H), 7.48 (d, *J*=3.6, 1H, m-PMes\*H), 7.25 (d, *J*=6.83, 1H, ArH), 7.12 (s, 1H, ArH), 6.95-6.86 (m, 3H, ArH), 1.72 (s, 9H, <sup>t</sup>Bu-PMes\*), 1.68 (s, 9H, <sup>t</sup>Bu-PMes\*), 1.59 (s, 9H, <sup>t</sup>Bu-PMes\*), 1.55 (s, 9H, <sup>t</sup>Bu-PMes\*), 1.47 (s, 9H, <sup>t</sup>Bu-PMes\*), 1.27 (s, 9H, N-<sup>t</sup>Bu), 1.19 (s, 9H, N-<sup>t</sup>Bu), 0.76 (s, 9H, <sup>t</sup>Bu-PMes\*), 0.55 (s, 9H, SiMe<sub>3</sub>).

<sup>13</sup>C NMR (101 MHz, C<sub>6</sub>D<sub>6</sub>) δ = 167.89 (s), 158.20 (d, *J*= 43.05), 154.21 (d, *J*= 10.79), 153.88 (s), 152.18 (s), 151.72 (s), 150.47 (s), 139.34 (d, *J*=25.34), 134.21 (s), 129.17 (d, *J*=6.29), 127.01 (s),

126.13 (s), 125.27 (s), 123.41 (d,  $J=12.42$ ), 122.10 (d,  $J= 6.13$ ), 40.91(s), 40.47 (s), 39.13 (d,  $J= 6.92$ ), 38.83 (s), 35.14 (d,  $J=6.92$ ), 34.80 (s), 34.52 (s), 34.35 (s), 34.22 (s), 33.39 (s), 32.63 (s), 31.71 (s), 31.57 (s), 30.84 (d,  $J=7.94$ ), 0.67 (s).

$^{31}\text{P}\{^1\text{H}\}$  NMR (400 MHz,  $\text{C}_6\text{D}_6$ )  $\delta = 387.66$  (d,  $^1J_{\text{PP}}= 459.60$ ), 54.50 (d,  $^1J_{\text{PP}}= 459.60$ )

$^{29}\text{Si}\{^1\text{H}\}$  NMR (500 MHz,  $\text{C}_6\text{D}_6$ )  $\delta = -14.33$  (s,  $\text{SiMe}_3$ ),  $-86.43$  (s,  $\text{Si}[(\text{PhC}(\text{NtBu})_2\text{SiOCC})]$ )

MS (LIFDI, toluene):  $m/z$  for  $\text{C}_{59}\text{H}_{90}\text{FeN}_2\text{O}_4\text{P}_2\text{Si}_2$  ( $\text{M}$ ) $^+$ : 1064.3

EA experimental (calculated): C 66.14 (66.52), H 9.03 (8.52), N 2.31 (2.63) %.

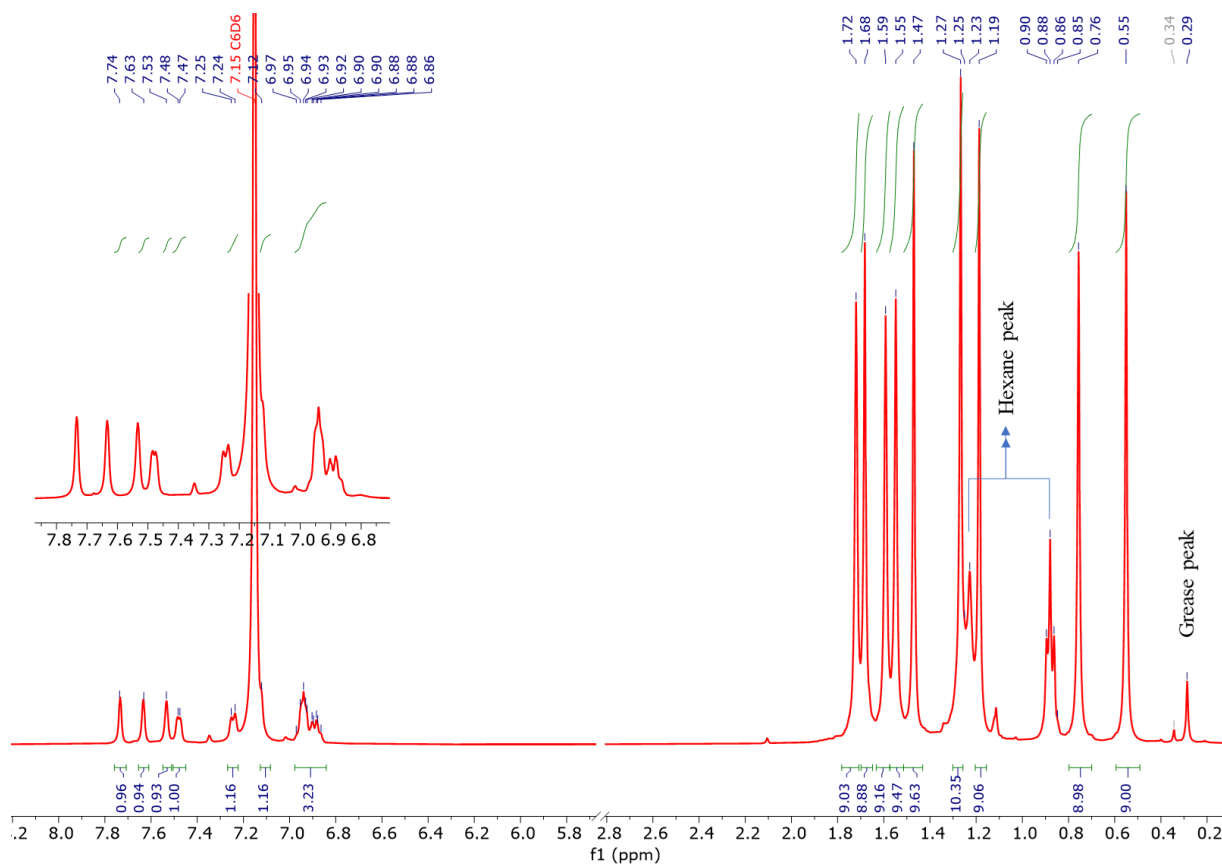

**Figure S9.**  $^1\text{H}$  NMR spectrum of **2** in  $\text{C}_6\text{D}_6$ .

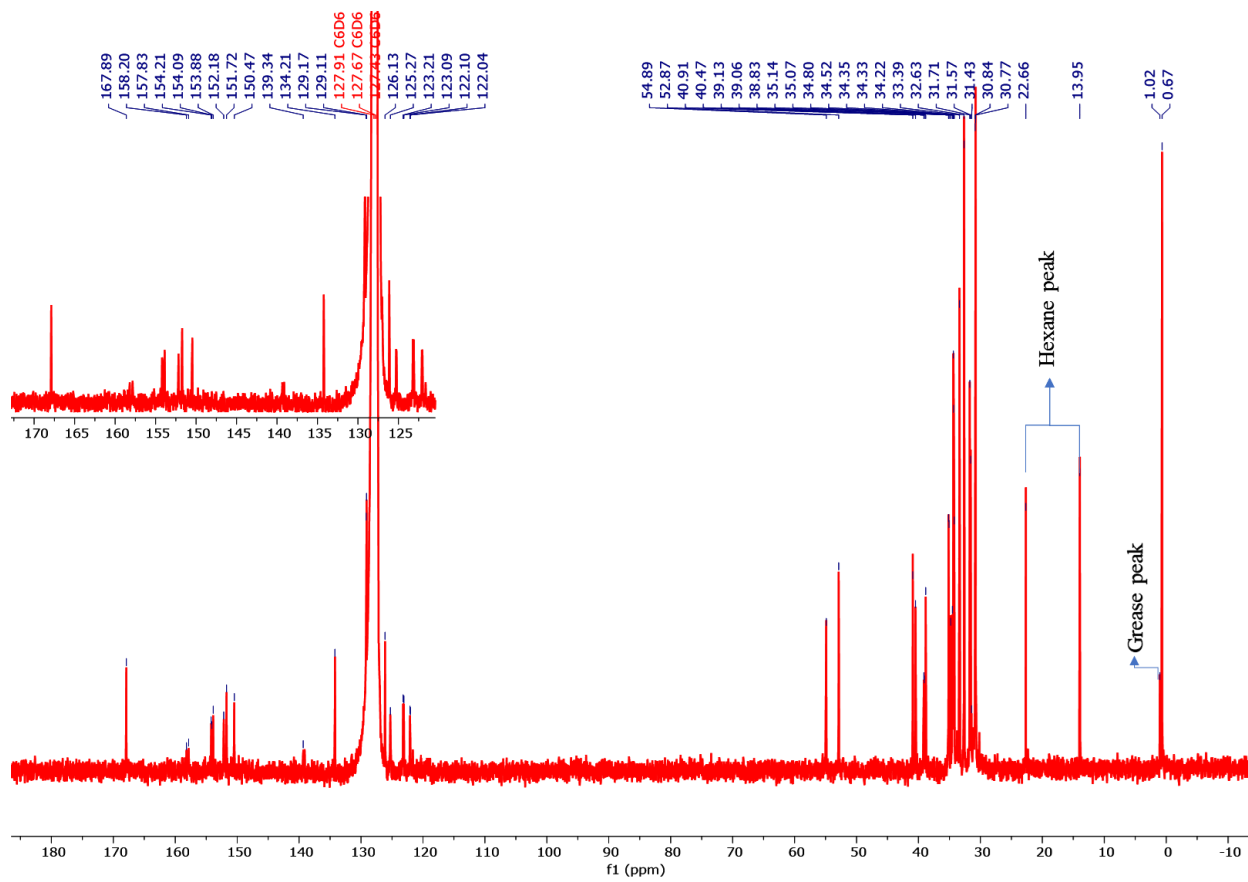

Figure S10.  $^{13}\text{C}$  NMR spectrum of **2** in  $\text{C}_6\text{D}_6$



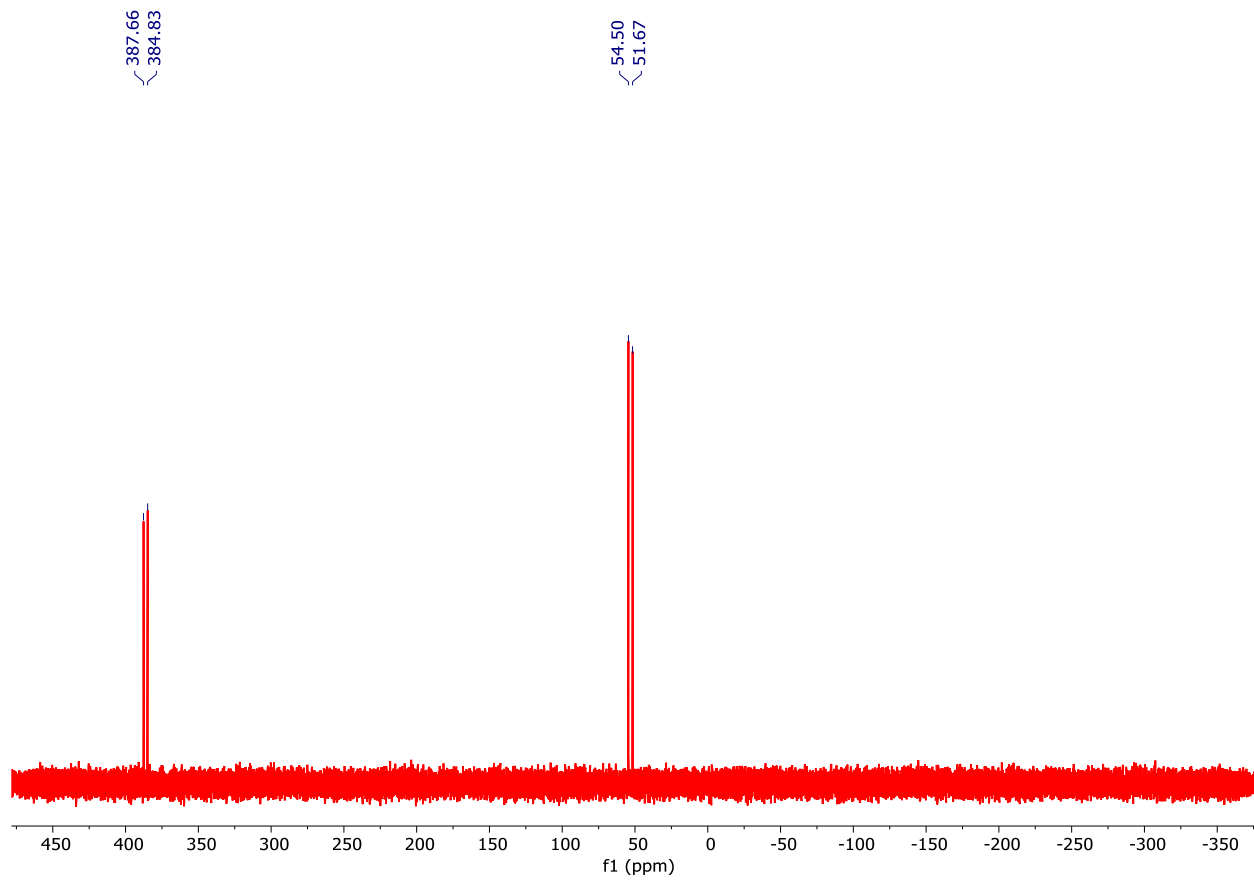

**Figure S11.**  $^{31}\text{P}\{^1\text{H}\}$  NMR spectrum of **2** in  $\text{C}_6\text{D}_6$ .

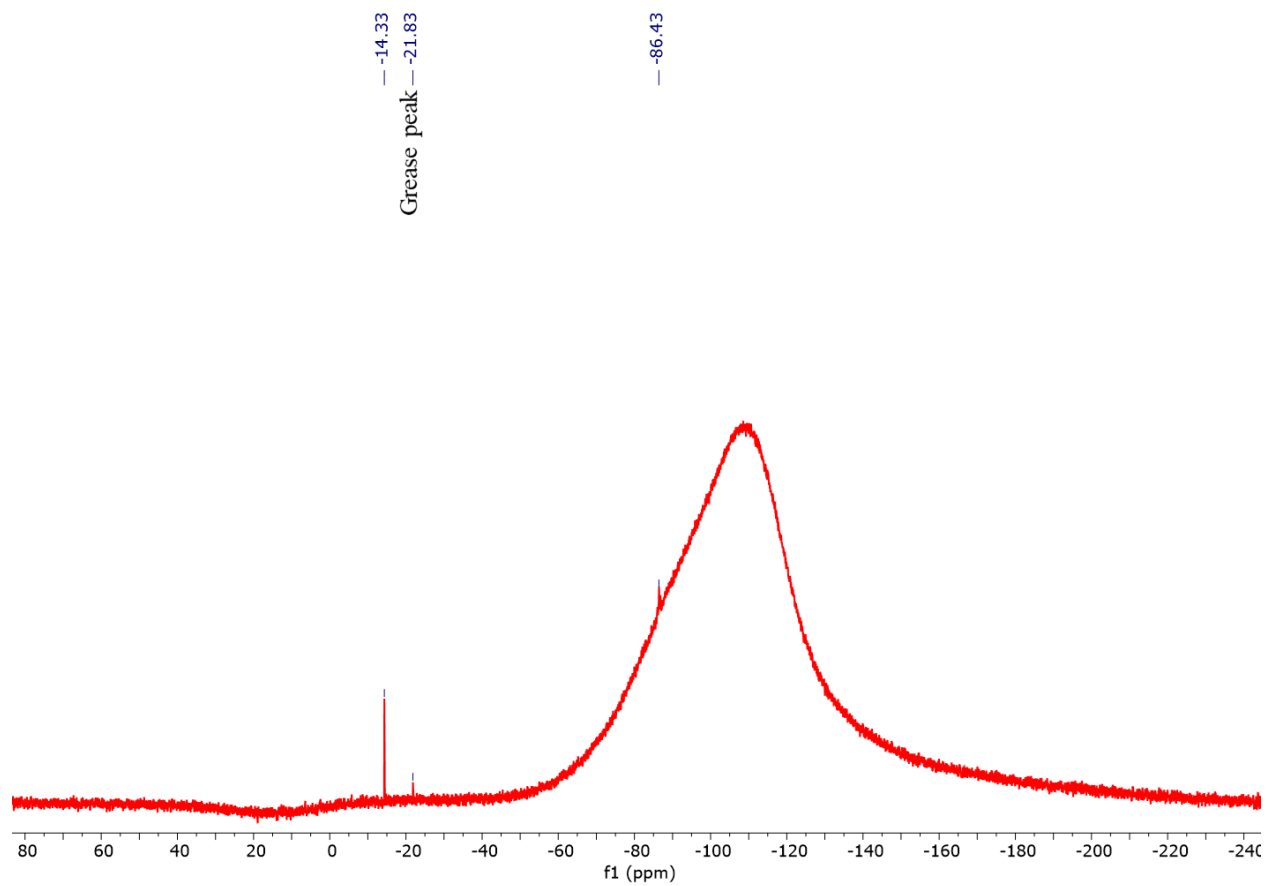

**Figure S12.**  $^{29}\text{Si}\{^1\text{H}\}$  NMR spectrum of **2** in  $\text{C}_6\text{D}_6$ .

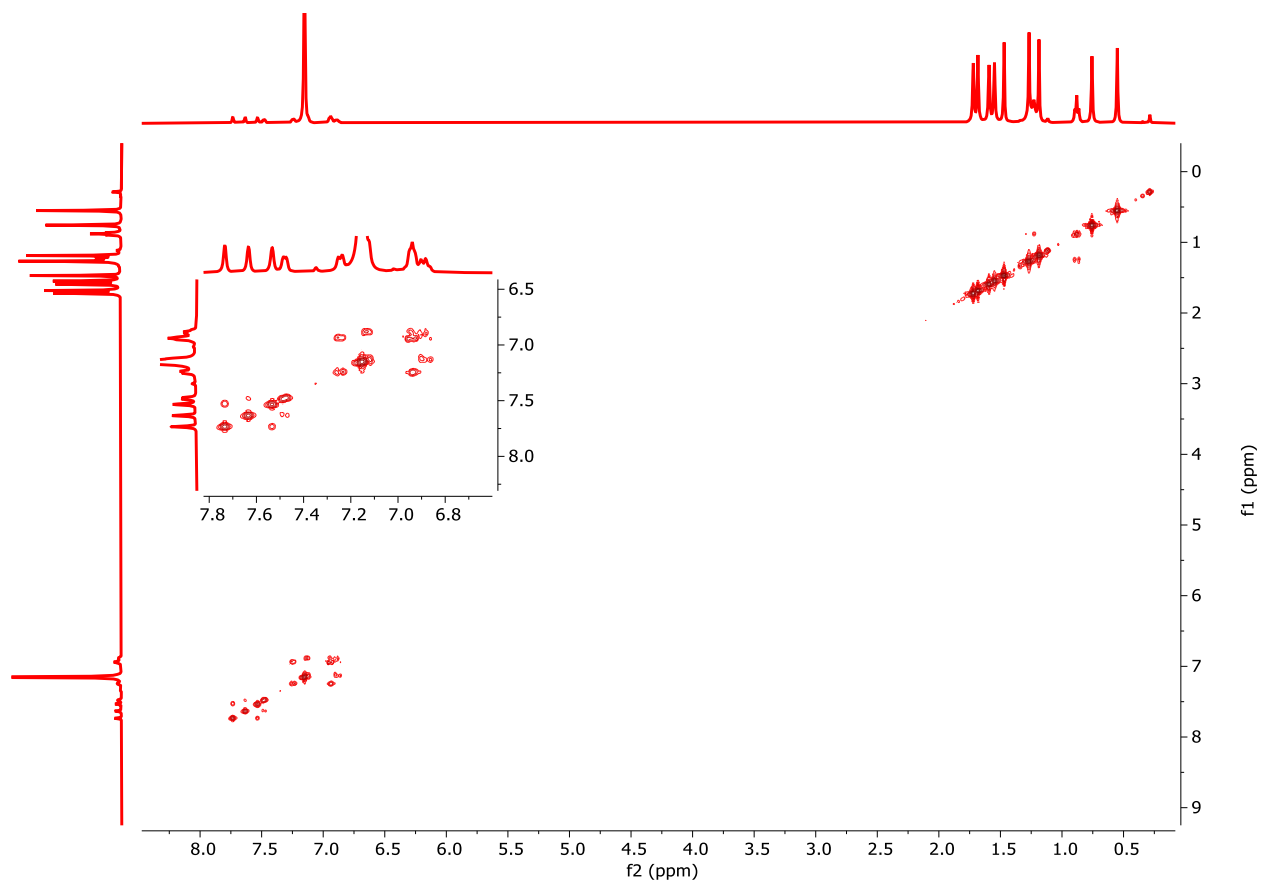

**Figure S13.** 2D  $^1\text{H}$ - $^1\text{H}$  COSY NMR spectrum of **2** in  $\text{C}_6\text{D}_6$ .

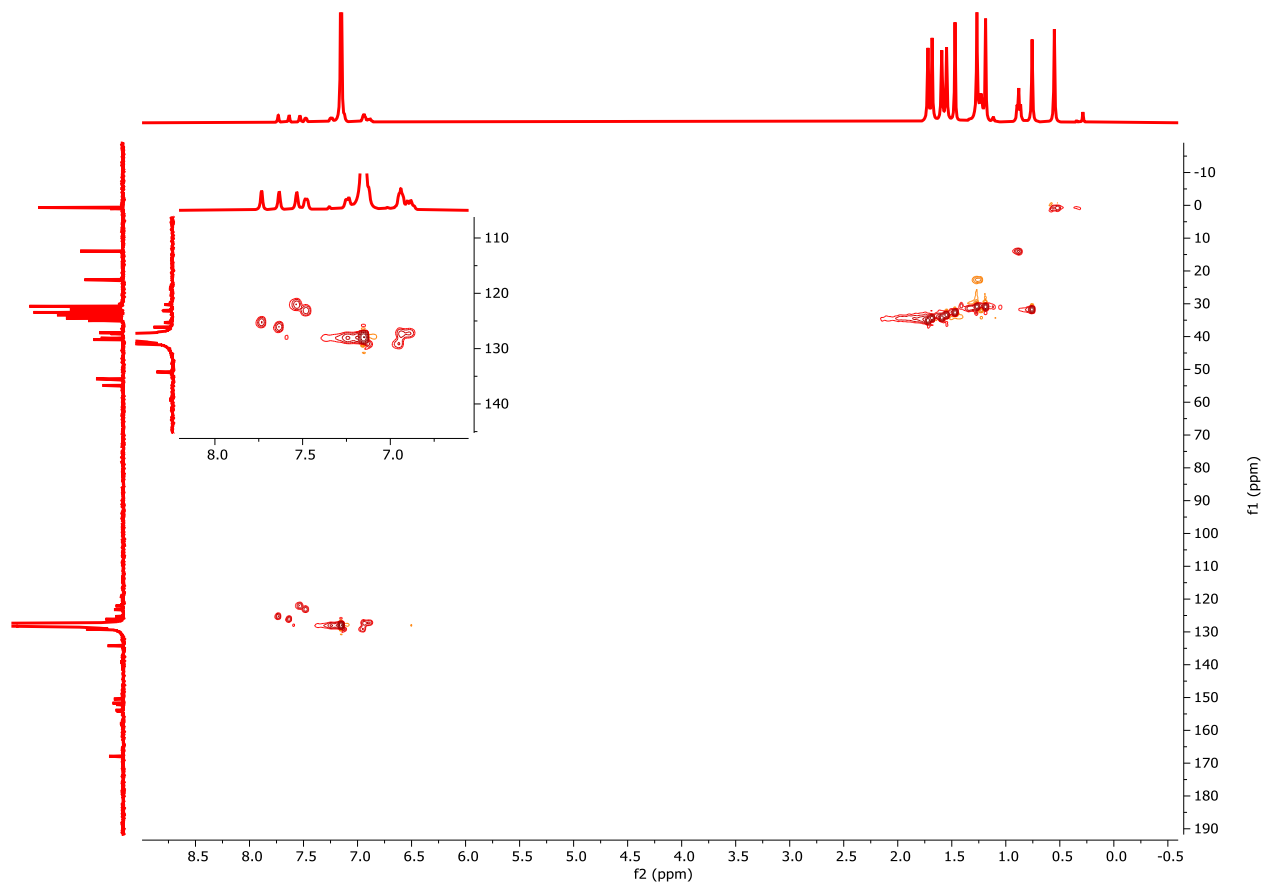

**Figure S14.** 2D  $^1\text{H}$ - $^{13}\text{C}$  HSQC NMR spectrum of **2** in  $\text{C}_6\text{D}_6$ .

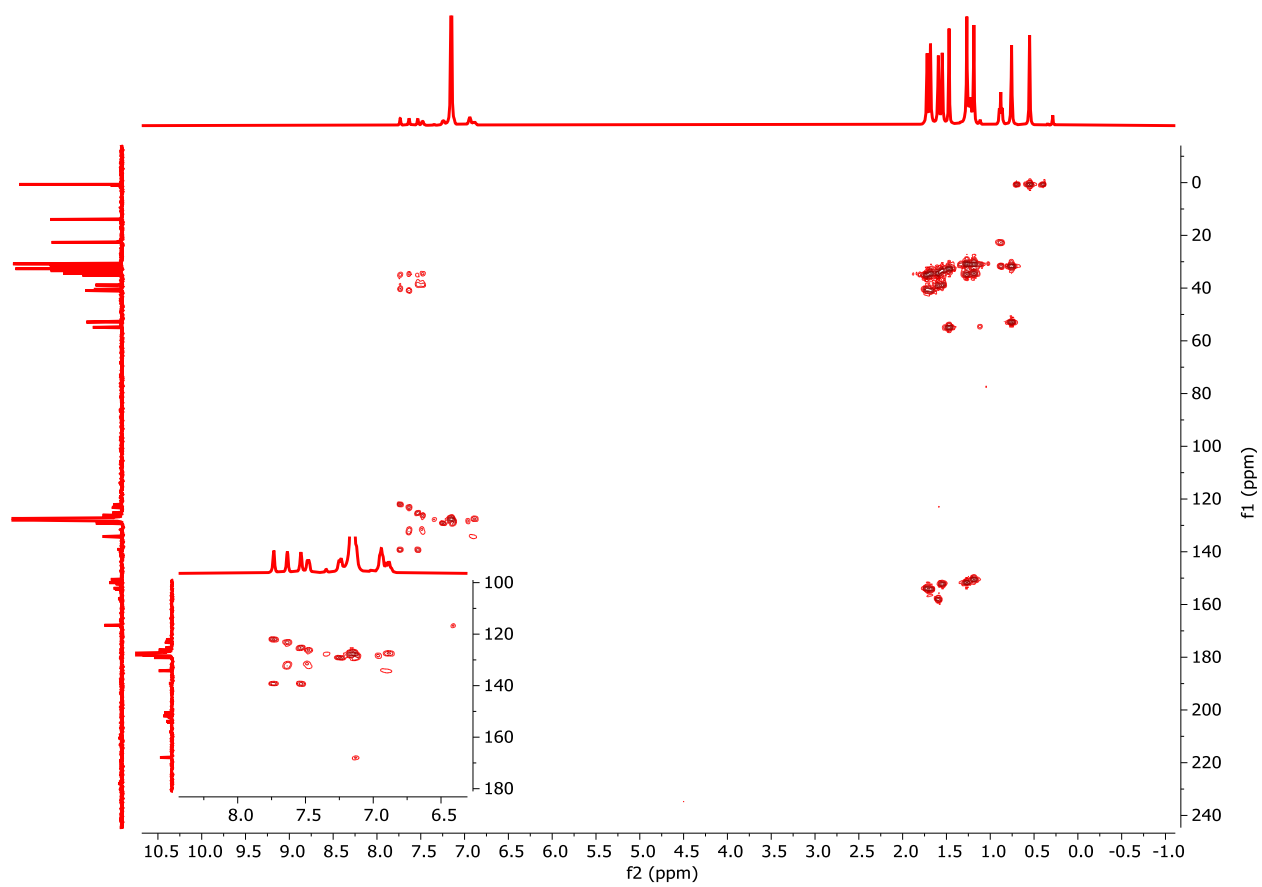

**Figure S15.** 2D  $^1\text{H}$ - $^{13}\text{C}$  HMBC NMR spectrum of **2** in  $\text{C}_6\text{D}_6$ .

(a)

Acq. Data Name: shendi00010-1  
Creation Parameters: Average(MS[1] Time:0.75..0.77)  
External Sample Id: zh7

Experiment Date/Time: 8/9/2023 11:08:37 AM  
Ionization Mode: FD+

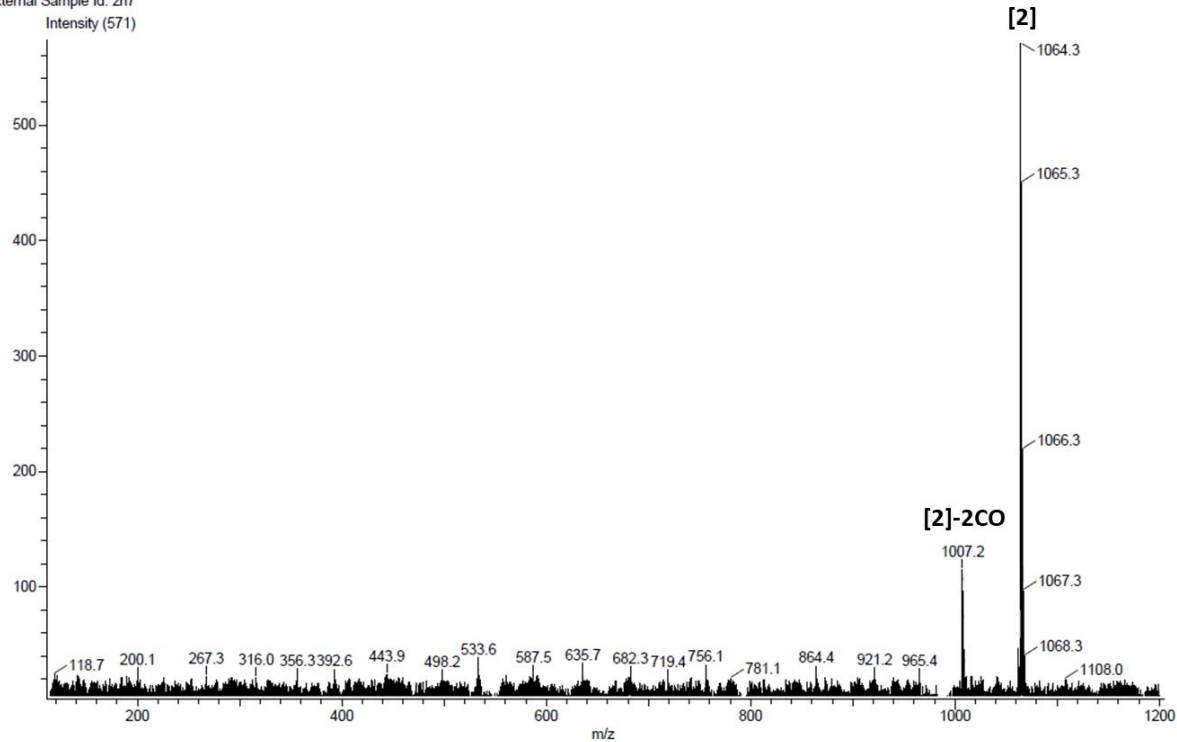

(b)

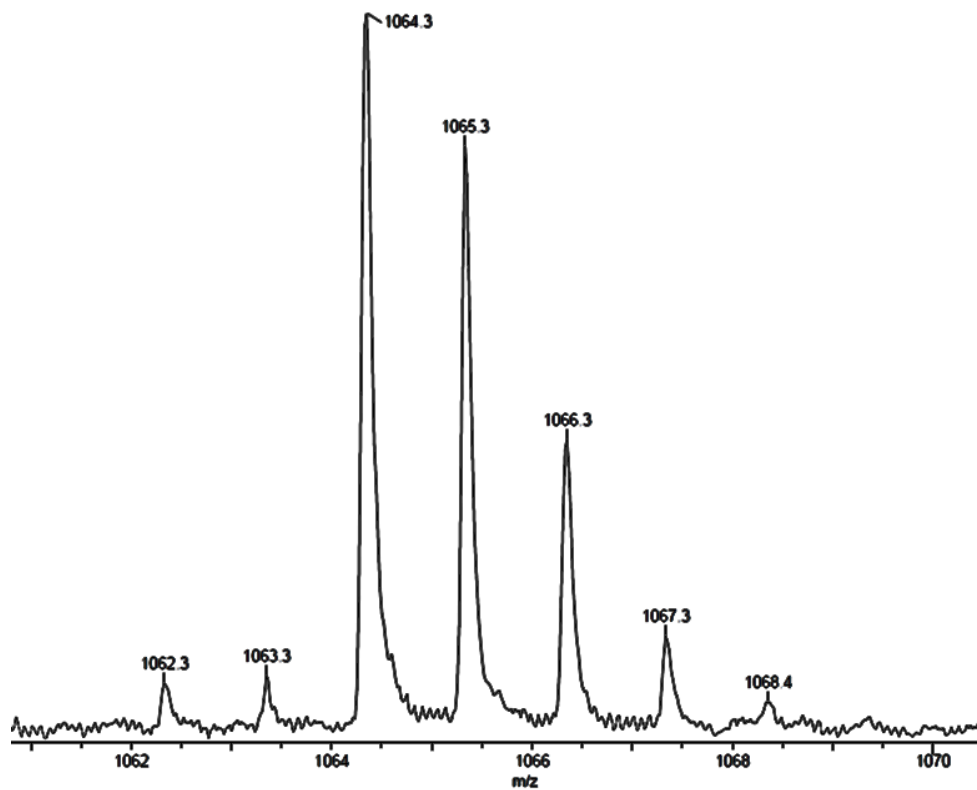

(Figure S16: (a) LIFDI spectrum of (2), (b) expansion of the pattern

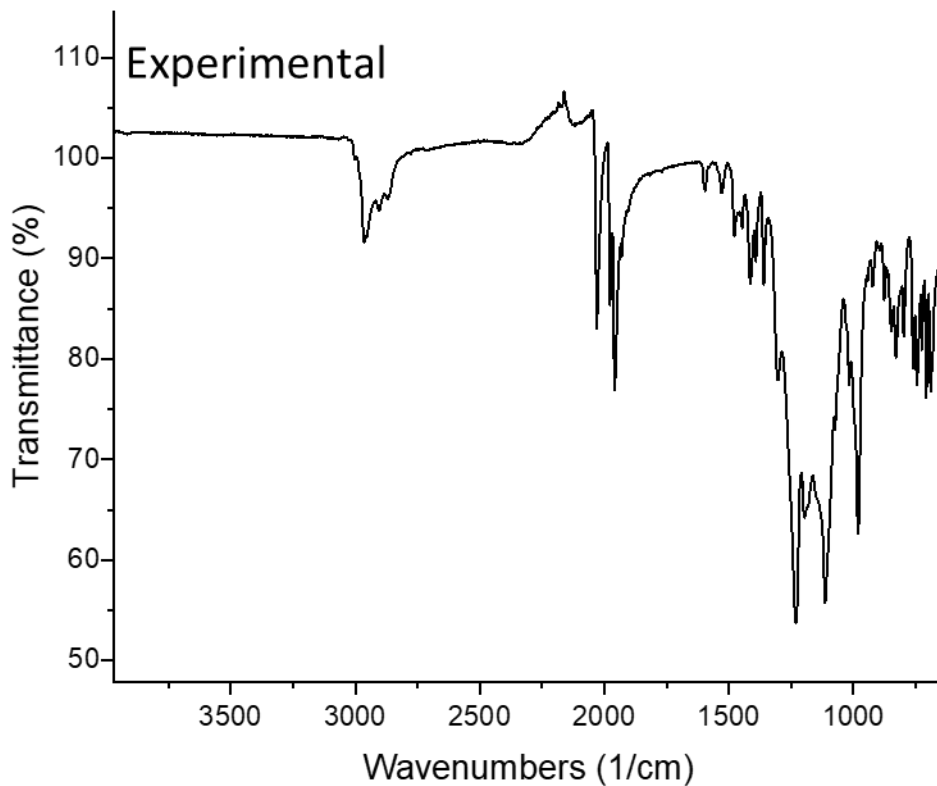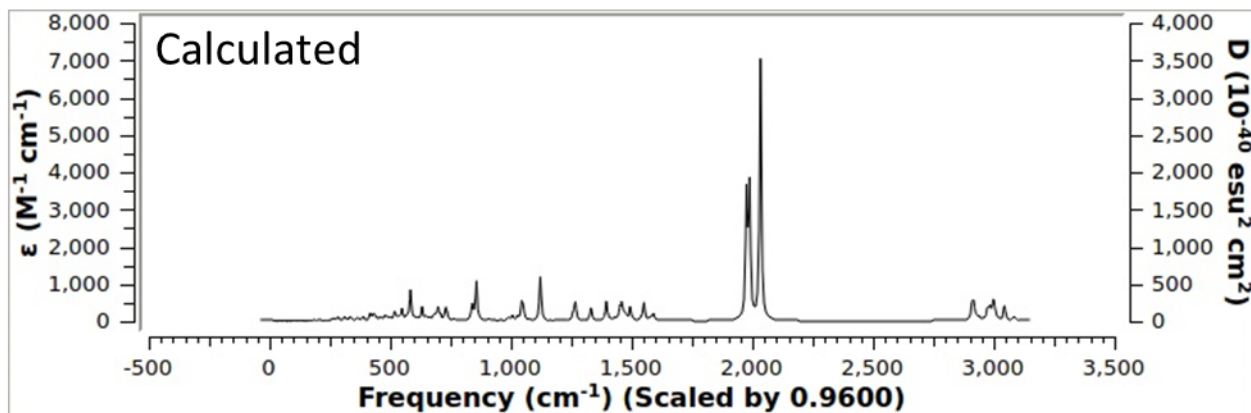

**Figure S17.** Experimental and calculated IR spectra of compound **2**.

**(C) Synthesis of (Mes\*P)<sub>2</sub>(C) Si(PhC(N<sup>t</sup>Bu)<sub>2</sub>)(COTMS)Mo (3).**

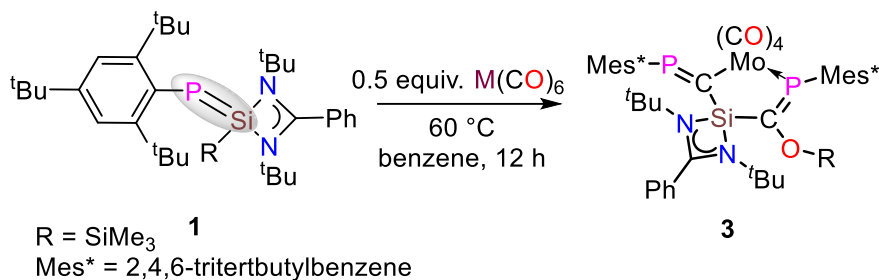

Mo(CO)<sub>6</sub> (26mg, 0.099 mmol) was added to a solution of (**1**) (120 mg, 0.197 mmol) in dry benzene (5 mL) at room temperature. The flask was sealed, and the reaction mixture was allowed to stir at 60°C for 12 hours which resulted in the formation of a dark red solution. After cooling to the room temperature red crystals of **3** were formed. The solution was separated from the crystals and the crystals were washed 3 times with dry benzene. The experimental and calculated IR spectra of **2** is demonstrated in fig S23. According to the calculated IR spectrum the IR values for Mo(CO)<sub>4</sub> units are in the range of 1950-2070 cm<sup>-1</sup>, for C-O-SiMe<sub>3</sub> unit is about 1320-1330 cm<sup>-1</sup>, P-C-O-SiMe<sub>3</sub> 1285 cm<sup>-1</sup>, and for P-C-Si[(PhC(N<sup>t</sup>Bu)<sub>2</sub>)] is around 1034 cm<sup>-1</sup> which are in agreement with the observed values in the experimental IR spectrum.

Yield 55 % (123 mg). mp 232-235 °C.

<sup>1</sup>H NMR (400 MHz, Tol(d<sub>8</sub>)) δ = 7.72 (s, 2H, PMes\*H), 7.64 (d, *J*=1.74, 2H, m-PMes\*H), 7.55 (d, *J*=7.62, 1H, ArH), 7.47-7.44 (m, 1H, ArH), 6.98-6.66 (m, 2H, ArH), 6.80-6.76 (m, 1H, ArH), 1.96 (s, 18H, <sup>t</sup>Bu-PMes\*), 1.89 (s, 18H, <sup>t</sup>Bu-PMes\*), 1.52 (s, 9H, <sup>t</sup>Bu-PMes\*), 1.36 (s, 9H, <sup>t</sup>Bu-PMes\*), 1.25 (s, 18H, N-<sup>t</sup>Bu), 0.02 (s, 9H, SiMe<sub>3</sub>).

<sup>13</sup>C NMR (400 MHz, Tol(d<sub>8</sub>)) δ = 219.88 (s), 213.13 (s), 178.47 (s), 156.24 (s), 153.07 (s), 151.07 (s), 149.96 (s), 131.03 (s), 130.84 (s), 130.58 (d, *J*=25.56), 130.20 (s), 128.37 (s), 127.43 (s),



127.10 (s), 125.58 (d,  $J = 5.00$ ), 124.28 (s), 123.15 (d,  $J = 4.25$ ), 122.35 (s), 54.50(s), 39.60 (s), 39.33 (s), 35.22 (d,  $J=5.36$ ), 34.98 (s), 34.17 (s), 32.00 (s), 31.58 (s), 31.34 (s), 31.22 (s), 30.28 (s), 23.06 (s), 14.29 (s), 2.88 (s).

$^{31}\text{P}\{^1\text{H}\}$  NMR (400 MHz, Tol( $\text{d}_8$ ))  $\delta = 483.41(\text{d}, ^3J_{\text{PP}} = 8.78)$ , 249.70 (s)

$^{29}\text{Si}\{^1\text{H}\}$  NMR (500 MHz, Tol( $\text{d}_8$ ))  $\delta = -16.41$  (m, Si [(PhC(NtBu) $_2$ )]), 14.30 (s, SiMe $_3$ )

MS (LIFDI, THF):  $m/z$  for  $\text{C}_{59}\text{H}_{90}\text{N}_2\text{O}_4\text{P}_2\text{Si}_2\text{Mo}$   $\{[(\text{M})^+]\text{-CO}\}$ : 1106.3

EA experimental (calculated): C 63.08 (63.58), H 8.29 (8.00), N 2.52 (2.47) %.

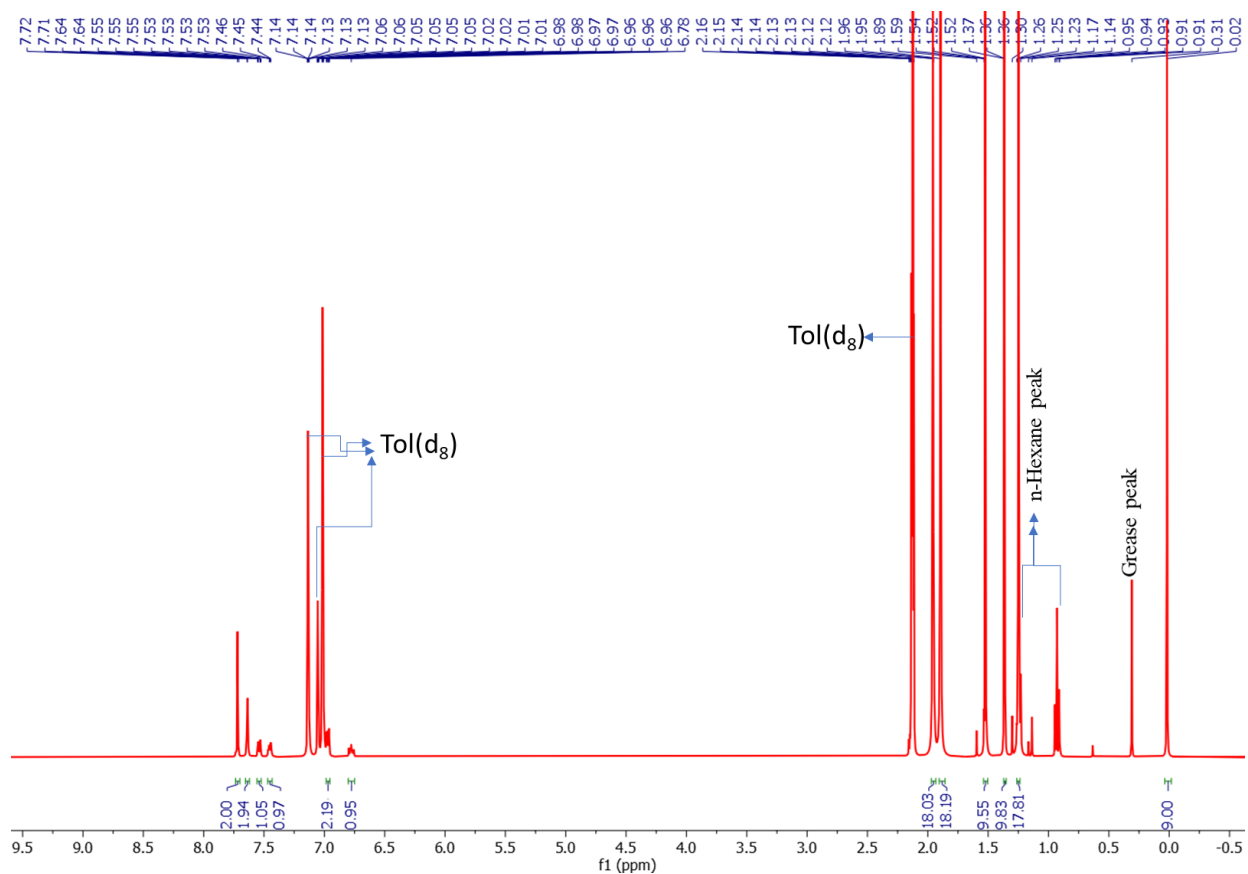

**Figure S18.**  $^1\text{H}$  NMR spectrum of compound (3) in Toluene ( $\text{d}_8$ ).

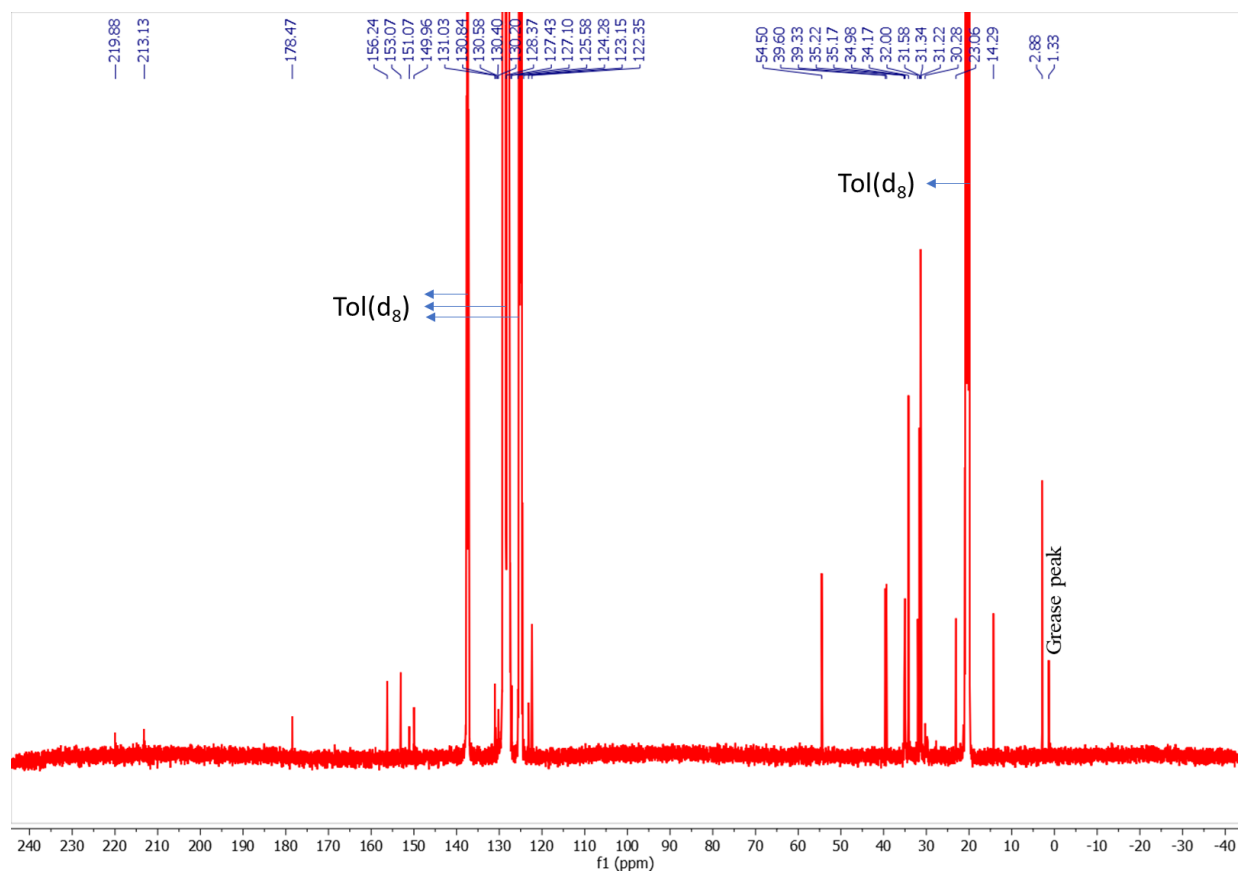

**Figure S19.**  $^{13}\text{C}$  NMR spectrum of compound (3) in Toluene ( $\text{d}_8$ ).

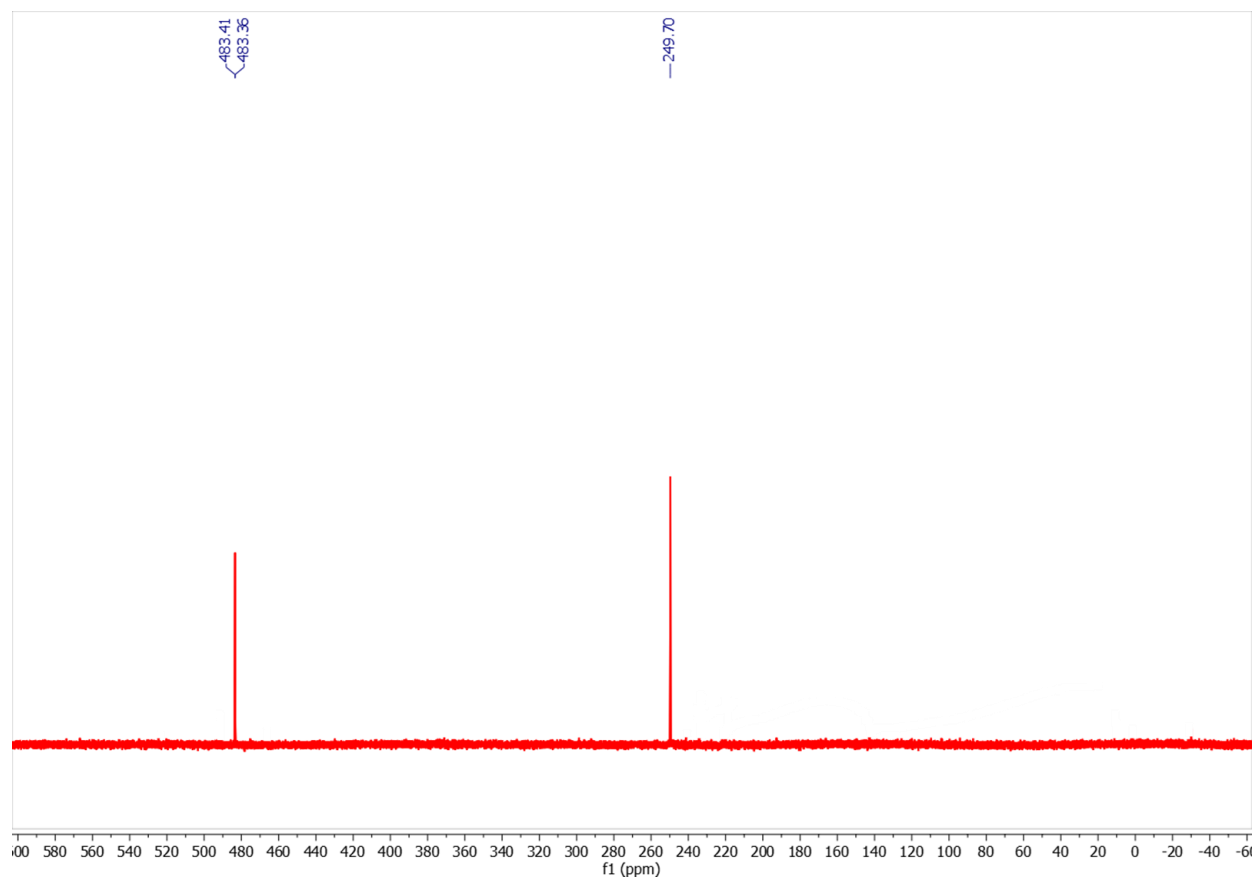

**Figure S20.**  $^{31}\text{P}$  NMR spectrum of compound (**3**) in Toluene ( $d_8$ ).

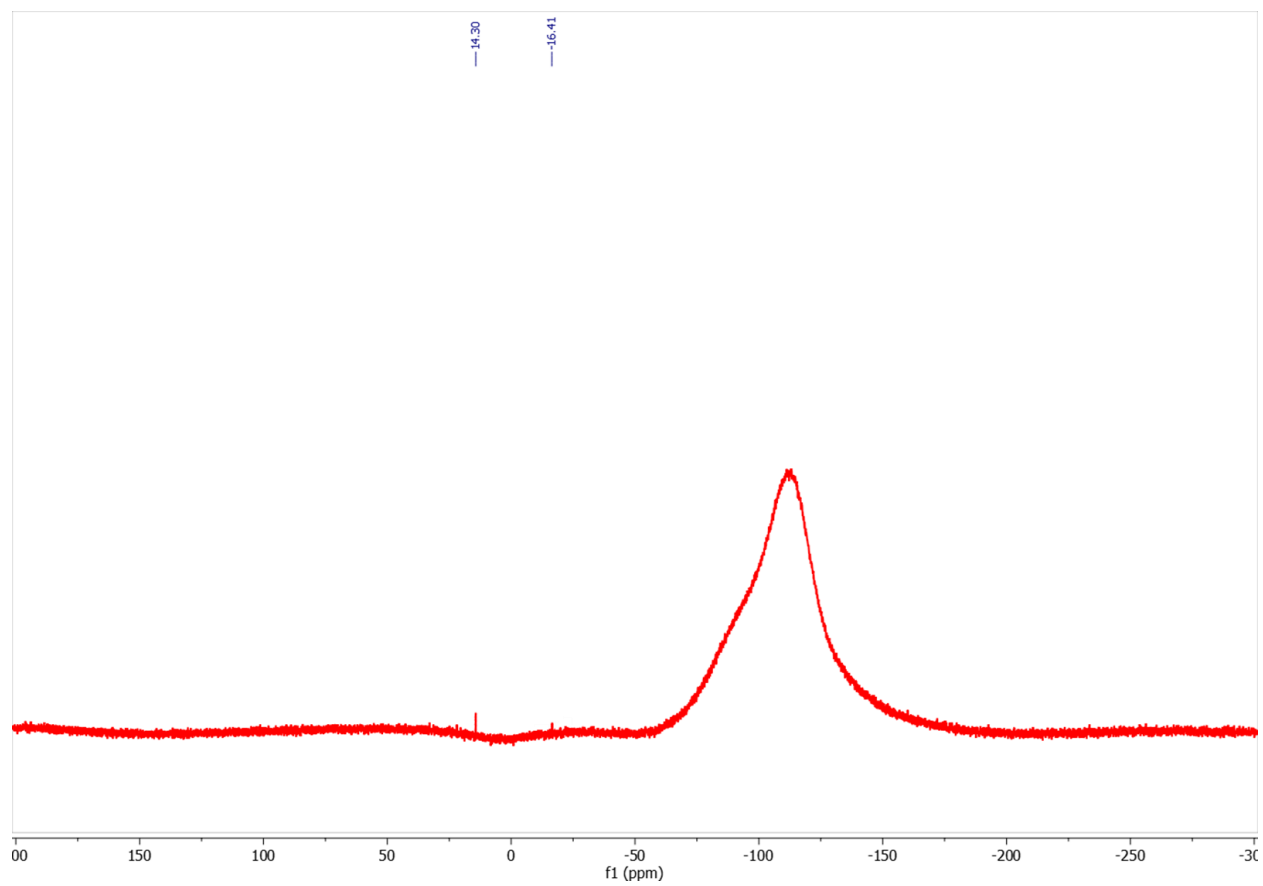

**Figure S21.**  $^{29}\text{Si}$  NMR spectrum of compound (**3**) in Toluene ( $d_8$ ).

(a)

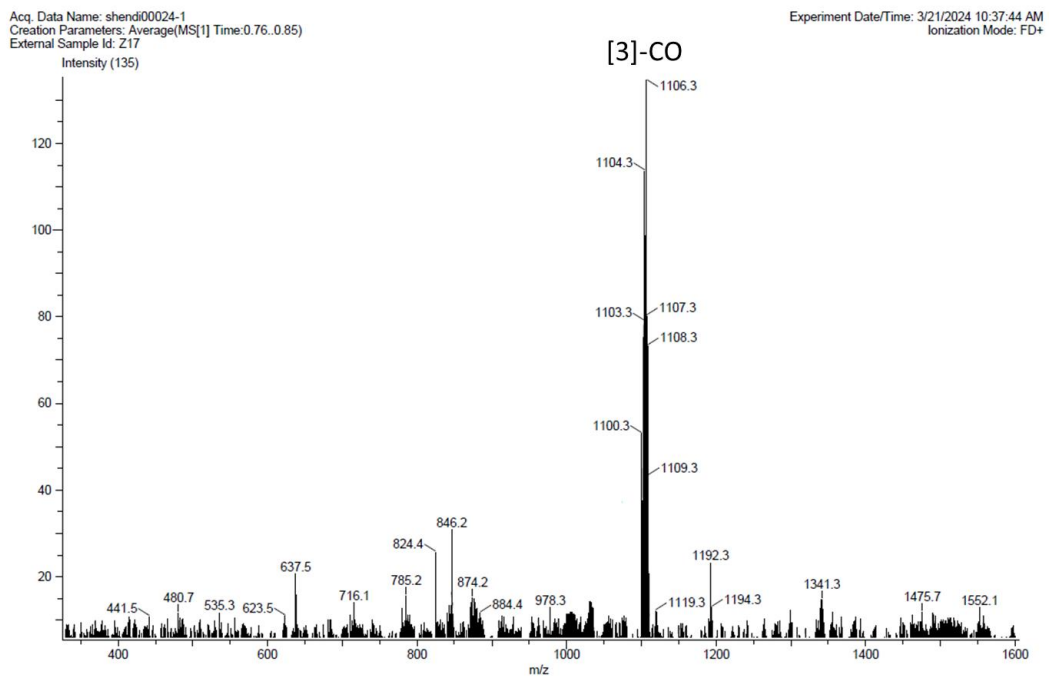

(b)

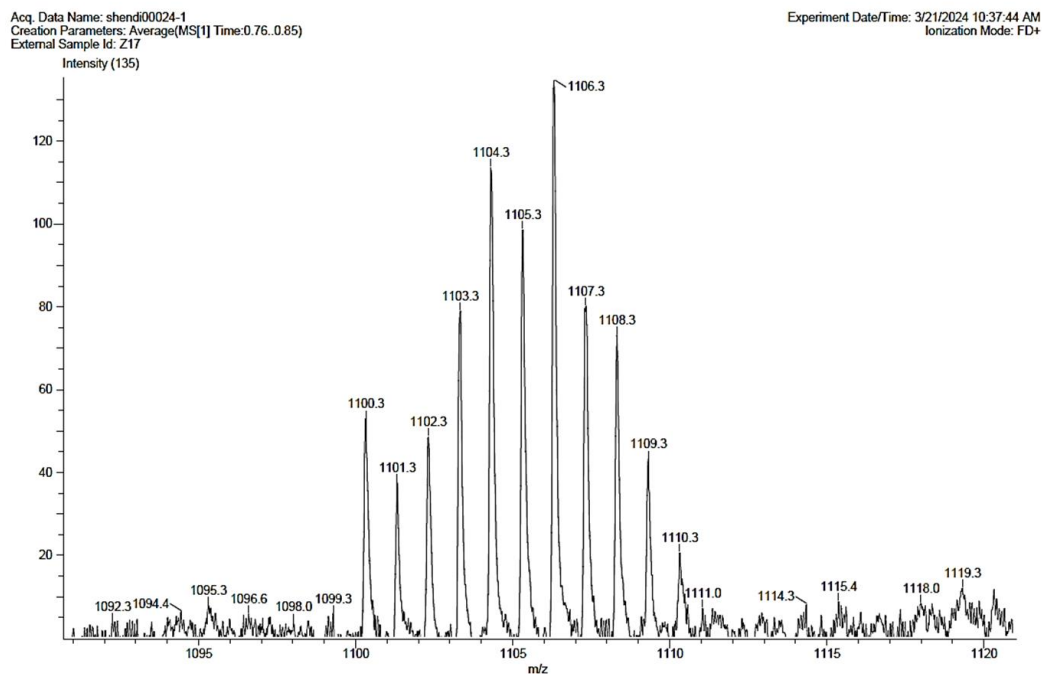

**Figure S22:** (a) LIFDI spectrum of compound (3), (b) expansion of the pattern.

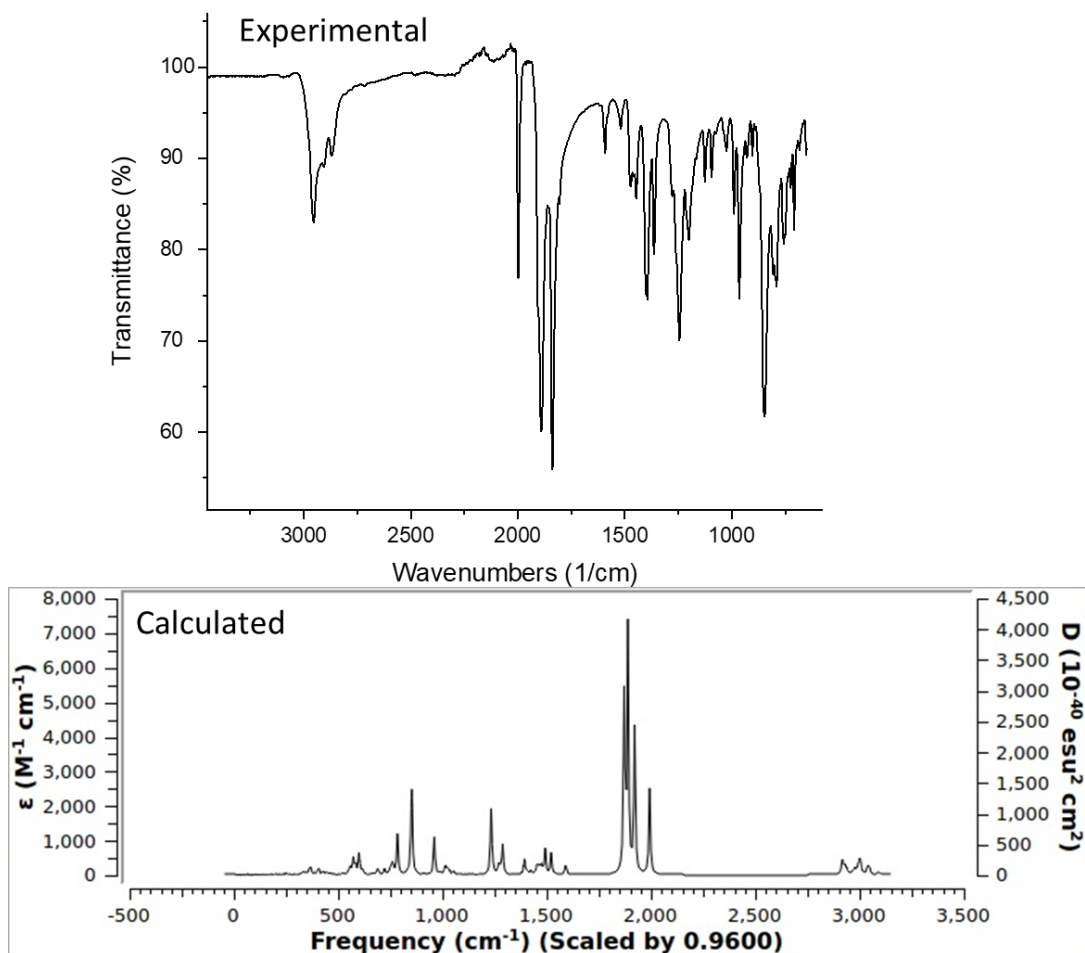

**Figure S23:** Experimental and calculated IR spectrum of the compound (**3**) ( $\text{cm}^{-1}$ ).

**(D) Synthesis of  $(\text{Mes}^*\text{P})_2(\text{C})\text{Si}(\text{PhC}(\text{N}^t\text{Bu})_2)(\text{CO}(\text{TMS}))\text{W}$  (**4**).**

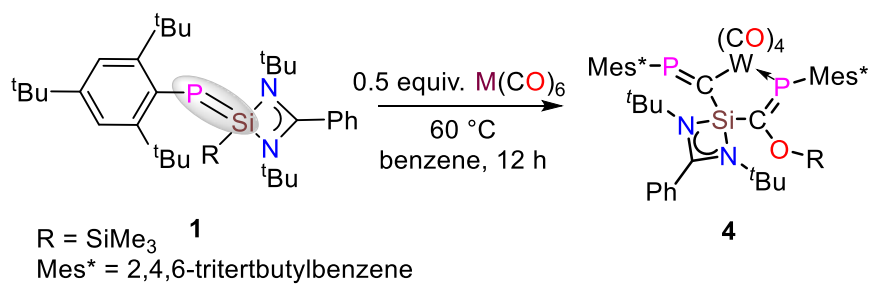

W(CO)<sub>6</sub> (35 mg, 0.099 mmol) was added to a solution of (1) (120 mg, 0.197 mmol) in dry benzene (5 mL) at room temperature. The flask was sealed, and the reaction mixture was allowed to stir at 60°C for 12 hours which resulted in the formation of a dark red solution. After cooling to the room temperature red crystals of 4 were formed. The solution was separated from the crystals and the crystals were washed three times with dry benzene. The calculated IR spectrum of 4 is in good agreement with the experimental one Fig S32.

Yield 62 % (150 mg). mp 248-252 °C.

<sup>1</sup>H NMR (400 MHz, THF(d<sub>8</sub>)) δ = 7.68-7.63 (m, 7H, ArH), 7.41 (d, 2H, m-PMes\*H), 1.76 (s, 18H, m-<sup>t</sup>Bu-PMes\*), 1.69 (s, 18H, m-<sup>t</sup>Bu -PMes\*), 1.40 (s, 9H, p-<sup>t</sup>Bu-PMes\*), 1.38 (s, 9H, p-<sup>t</sup>Bu-PMes\*), 1.31 (s, 18H, N-<sup>t</sup>Bu), 0.76 (s, 9H, <sup>t</sup>Bu-PMes\*), 0.08 (s, 9H, SiMe<sub>3</sub>).

<sup>13</sup>C NMR (101 MHz, C<sub>6</sub>D<sub>6</sub>) δ = 209.70 (d, *J*=5.26), 207.41 (d, *J*=10.79), 179.22 (s), 155.58 (s), 152.42 (s), 151.21 (s), 148.96 (s), 131.44 (s), 130.14 (s), 129.58 (s), 128.64 (s), 127.77 (s), 127.53 (s), 127.34 (d, *J*=5.45) 123.10 (d, *J*=5.45), 121.52 (s), 54.40 (s), 39.14 (s), 38.59 (s), 34.88 (s), 34.54 (s), 34.18 (d, *J*= 6.16), 33.66(s), 33.40 (s), 31.56 (s), 30.81 (s), 30.77 (s), 30.66 (s), 30.48 (s), 22.56 (s), 13.47 (s), 2.17 (s).

<sup>31</sup>P{<sup>1</sup>H} NMR (400 MHz, C<sub>6</sub>D<sub>6</sub>) δ = 466.95 (d, <sup>3</sup>*J*<sub>PP</sub>= 7.8), 216.75 (d, <sup>3</sup>*J*<sub>PP</sub>= 7.8).

<sup>29</sup>Si{<sup>1</sup>H} NMR (500 MHz, C<sub>6</sub>D<sub>6</sub>) δ = 16.28 (s, SiMe<sub>3</sub>), -10.82 to -12.62 (dd, <sup>2</sup>*J*<sub>SiP</sub>= 114.44, <sup>2</sup>*J*<sub>SiP</sub>= 62.56, Si [(PhC(N<sup>t</sup>Bu)<sub>2</sub>SiOCC]).

MS (LIFDI, THF): m/z for C<sub>59</sub>H<sub>90</sub>N<sub>2</sub>O<sub>4</sub>P<sub>2</sub>Si<sub>2</sub>W {[*(M)*<sup>+</sup>]-CO}: 1192.3

EA experimental (calculated): C 58.73 (59.01), H 7.02 (7.43), N 2.43 (2.29) %.

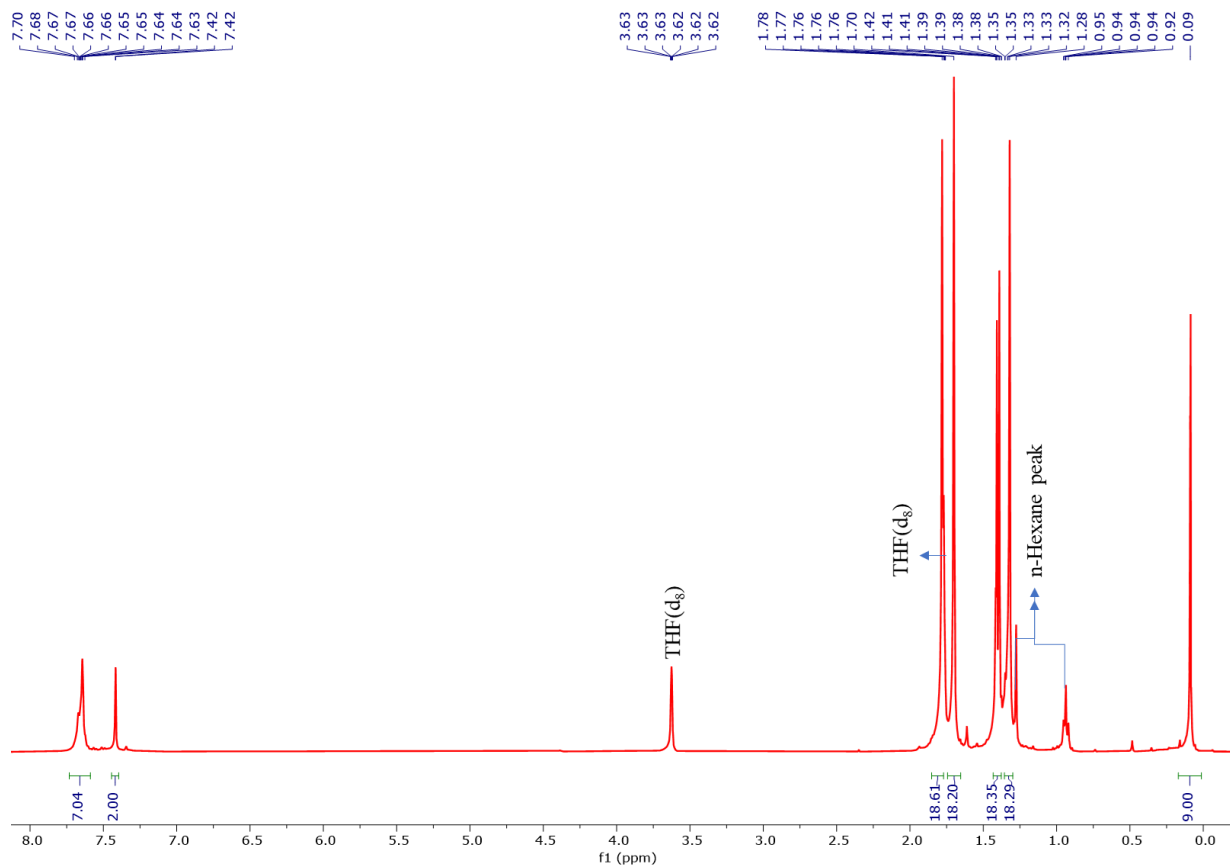

**Figure S24.**  $^1\text{H}$  NMR spectrum of compound (**4**) in THF ( $d_8$ ).



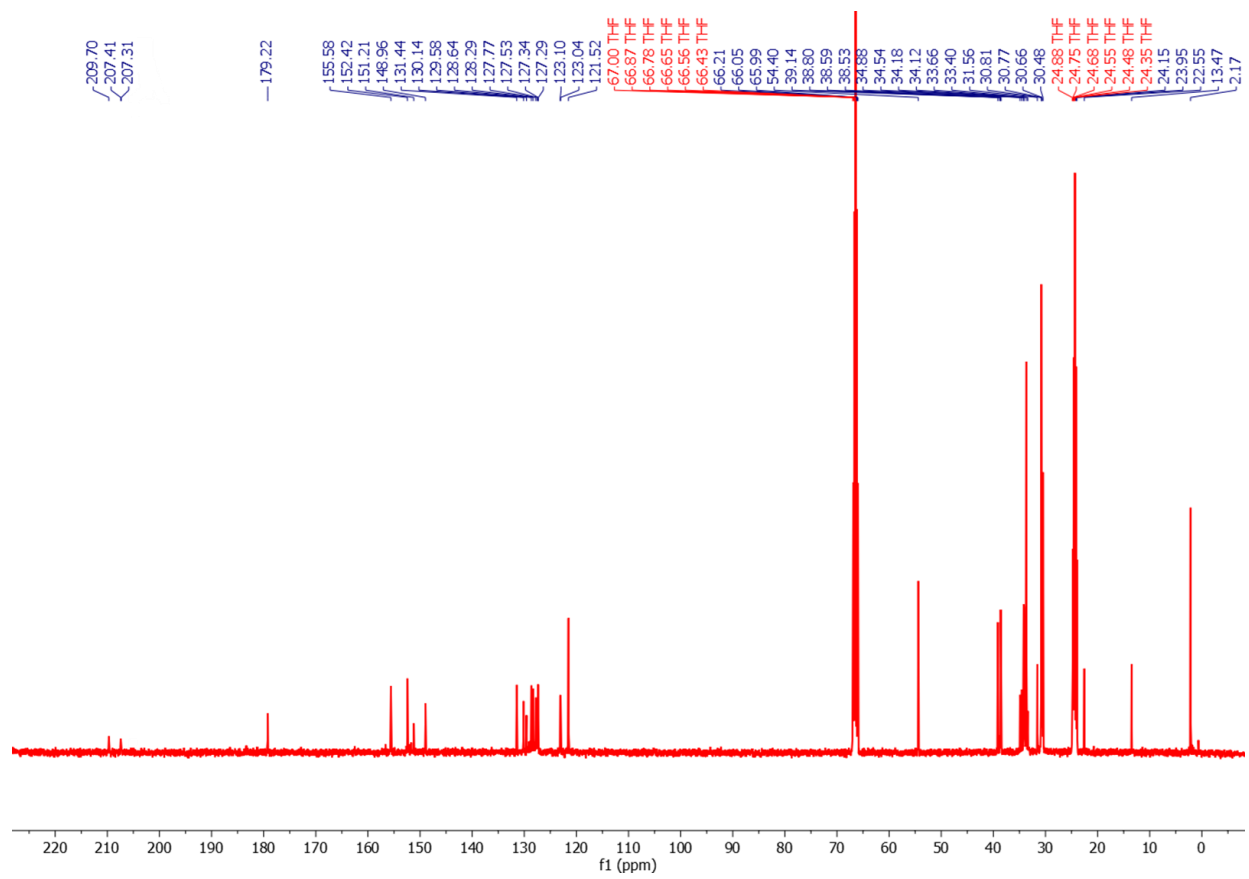

**Figure S25.**  $^{13}\text{C}$  NMR spectrum of compound (**4**) in THF ( $d_8$ ).

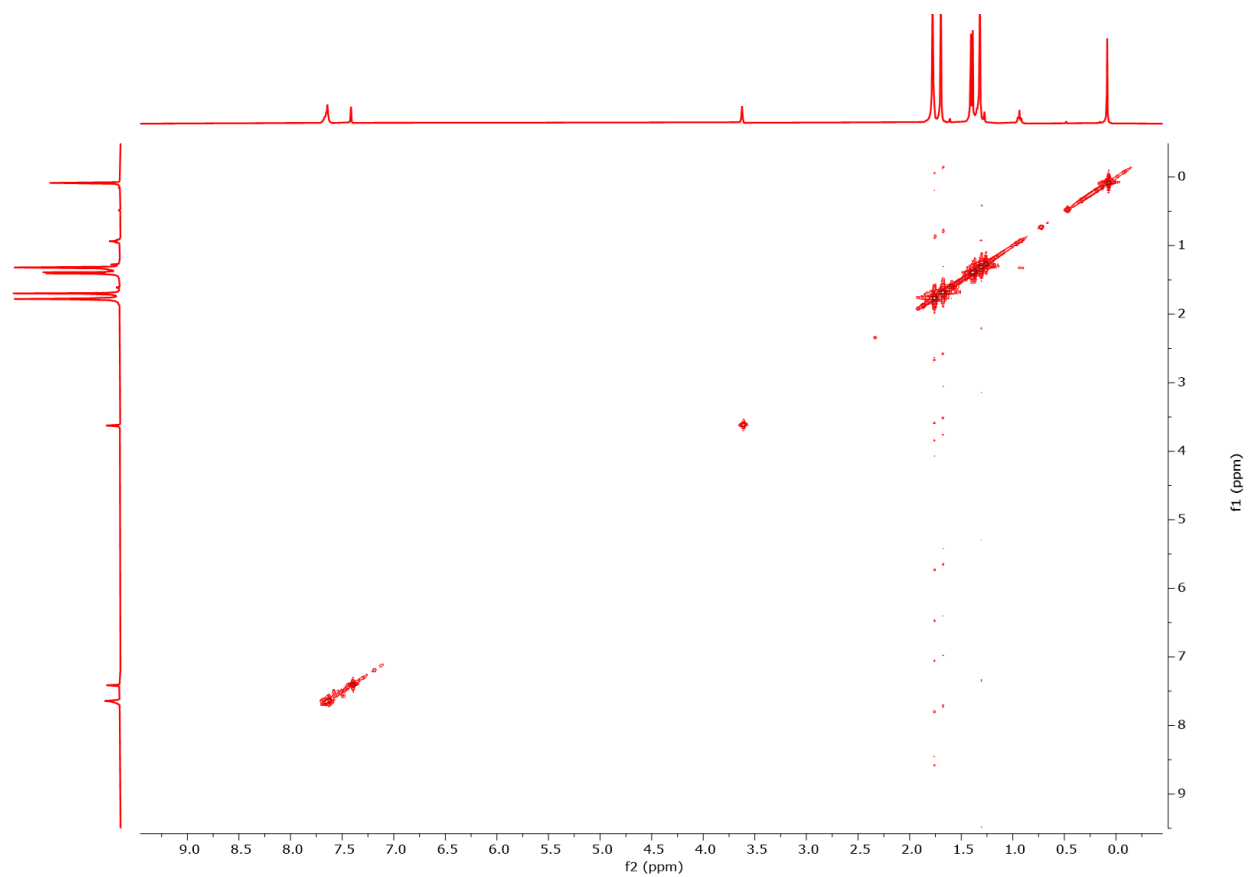

**Figure S26.** 2D  $^1\text{H}$  -  $^1\text{H}$  COSY NMR spectrum of compound (**4**) in THF ( $d_8$ ).

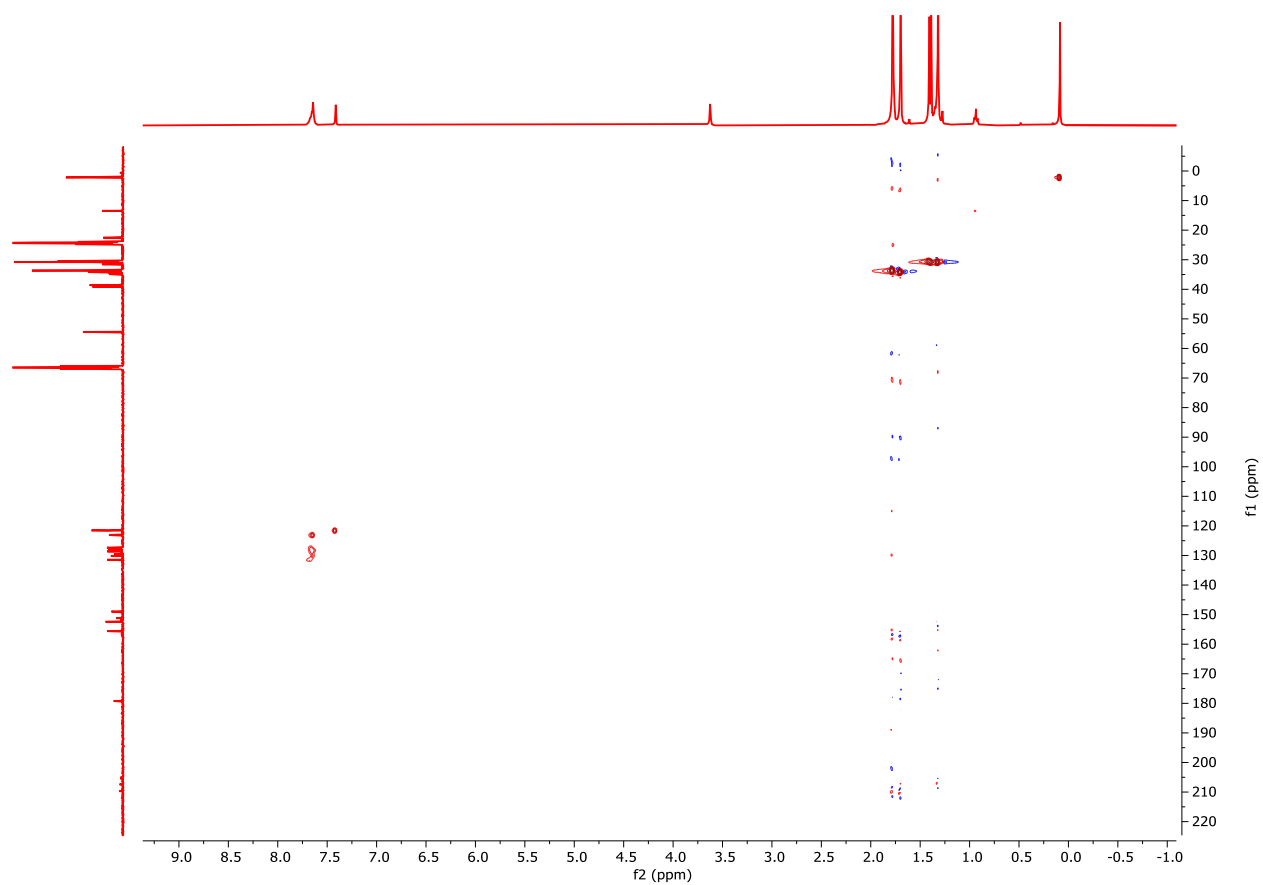

**Figure S27.** 2D  $^1\text{H}$  -  $^{13}\text{C}$  HSQC NMR spectrum of compound (**4**) in THF ( $d_8$ ).

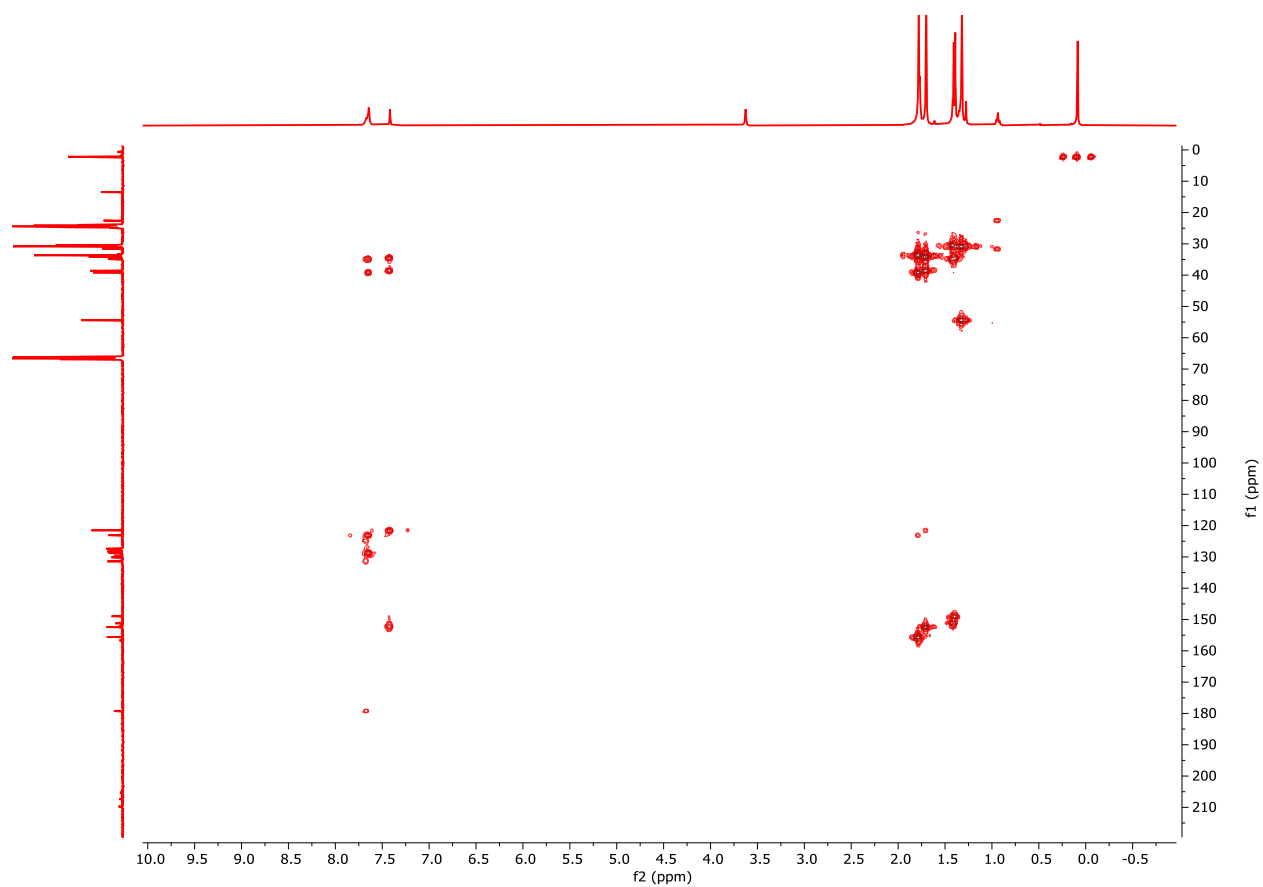

**Figure S28.** 2D  $^1\text{H}$  -  $^{13}\text{C}$  HMBC NMR spectrum of compound (**4**) in THF ( $d_8$ ).

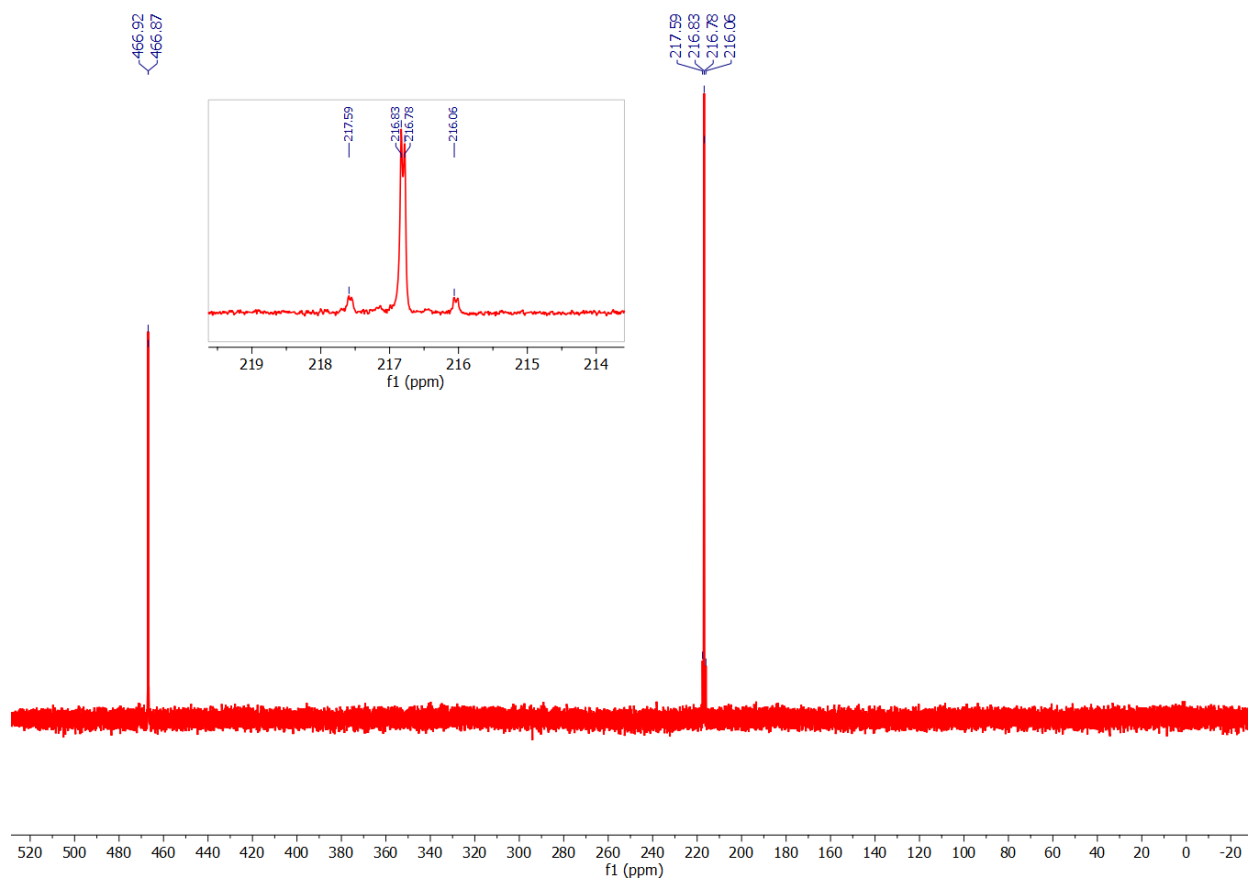

**Figure S29.**  $^{31}\text{P}$  NMR spectrum of compound (4) in THF ( $d_8$ ).

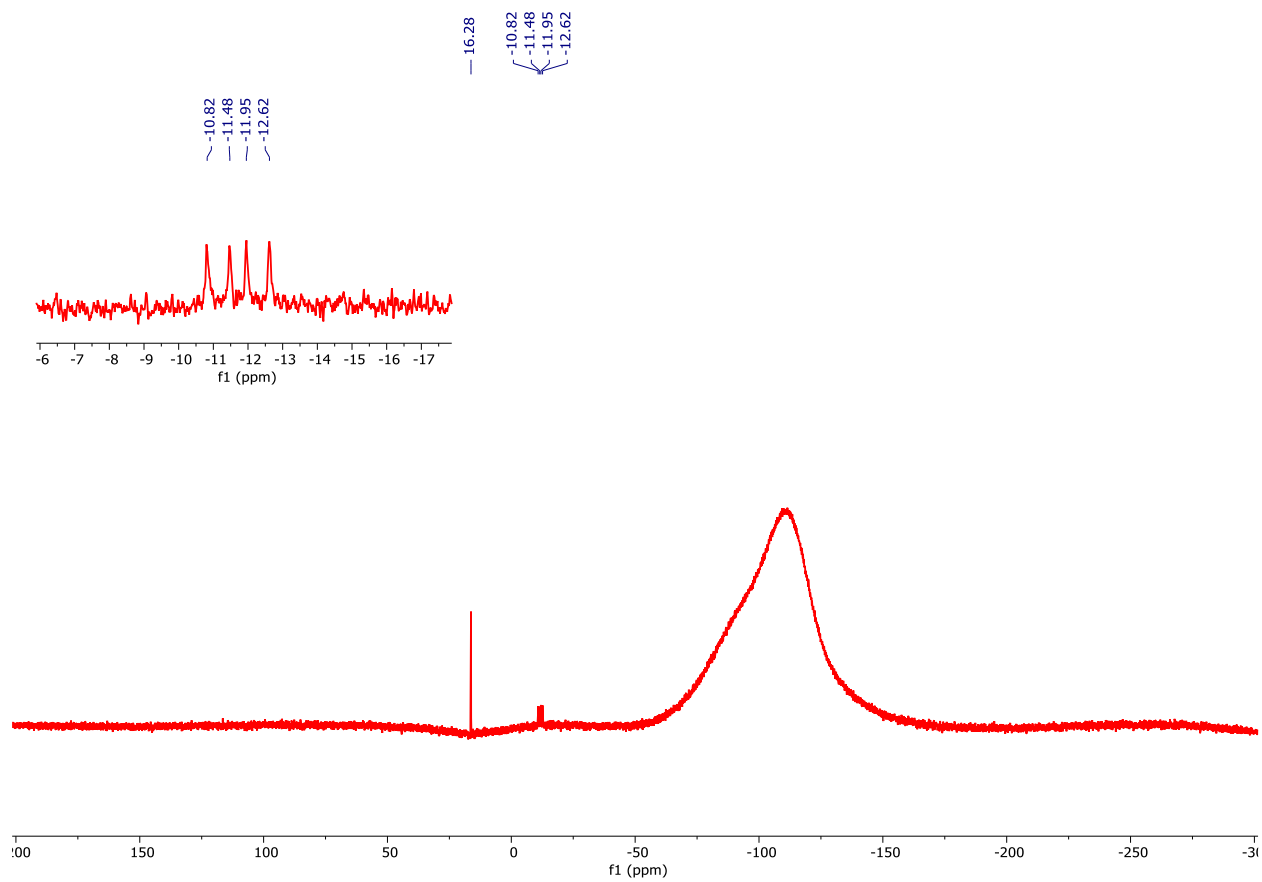

**Figure S30.**  $^{29}\text{Si}$  NMR spectrum of compound (4) in THF ( $d_8$ ).

(a)

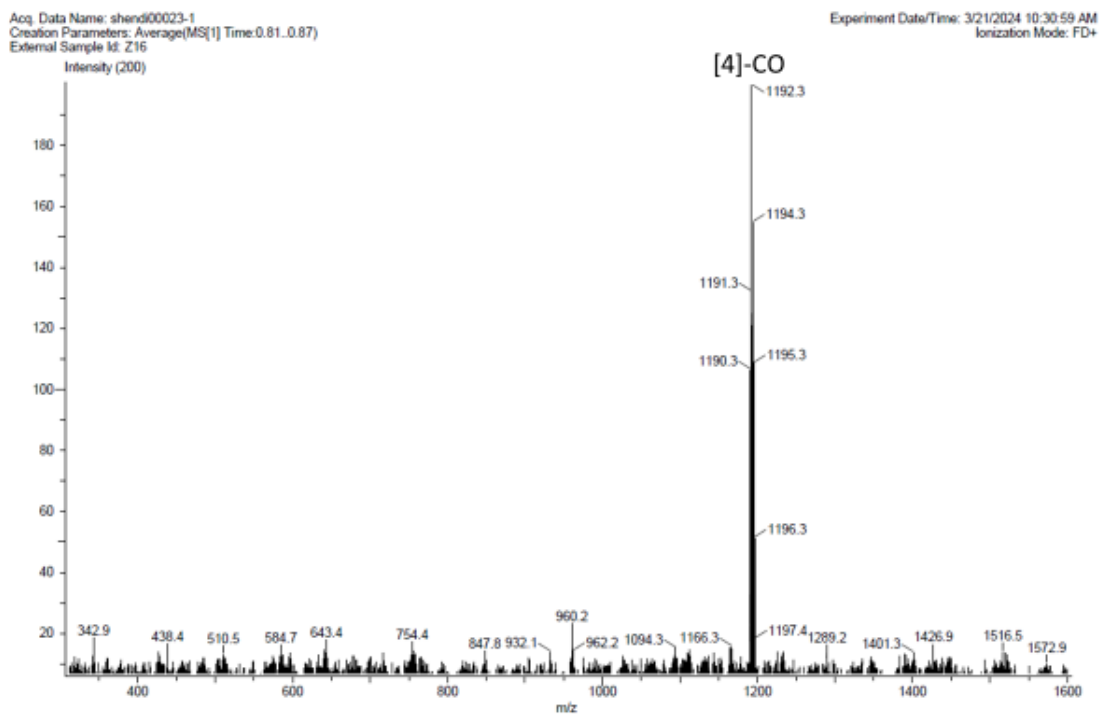

(b)

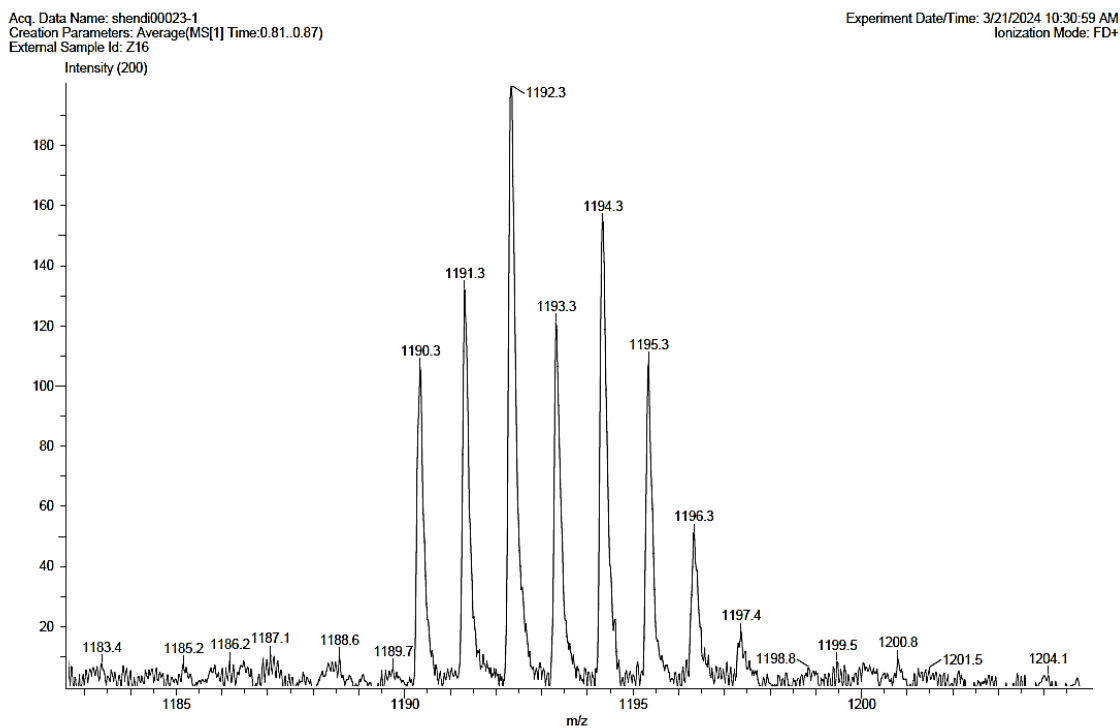

**Figure S31:** (a) LIFDI spectrum of compound (**4**), (b) expansion of the pattern.

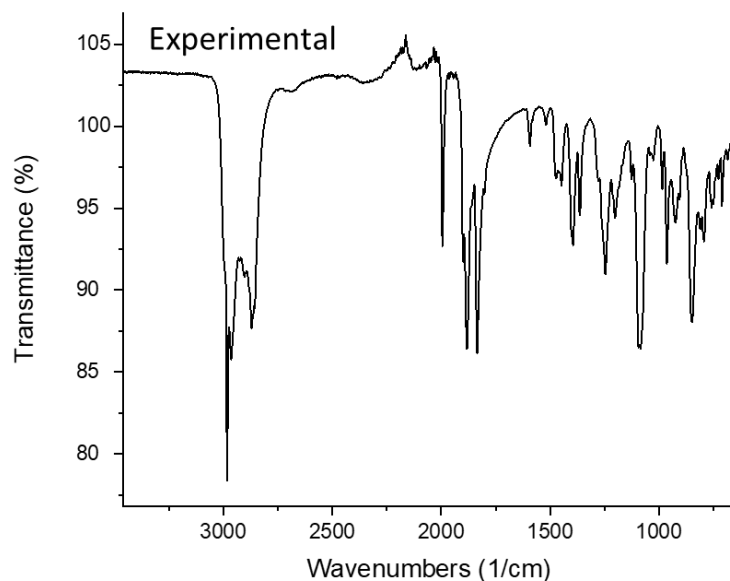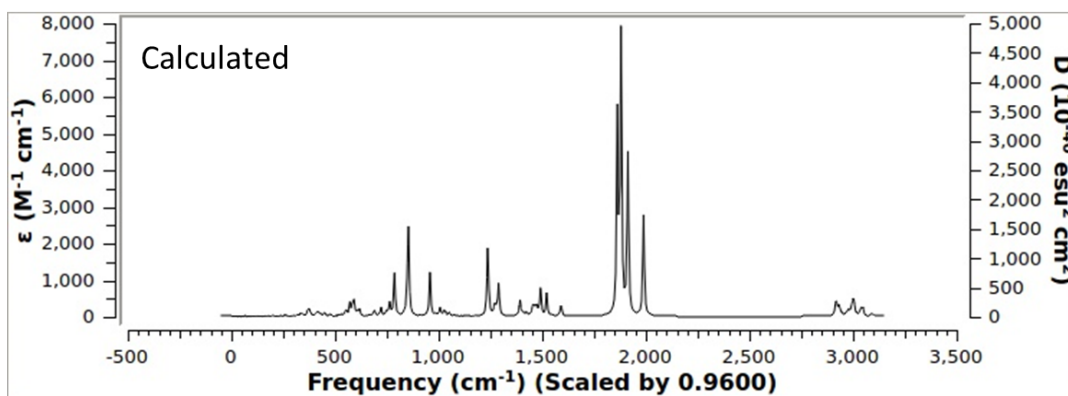

**Figure S32:** Experimental and calculated IR spectra of the compound (**4**) ( $\text{cm}^{-1}$ ).

### (E) Side product characterization

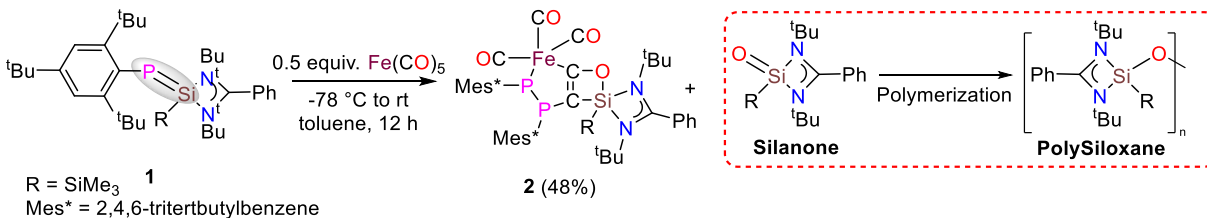

In order to separate the side product from the reaction mixture, after crystallization of compound **2** the hexane part was transferred to another RB. The RB was sealed and it was kept at  $-18\text{ }^\circ\text{C}$  for one night which resulted in precipitation of the side product, the hexane part was separated from



the precipitate and the precipitate was washed with cold hexane to afford a white powder. The latter was dried under vacuum for 2 hours. The  $^{29}\text{Si}$ -NMR is showing two resonances for the silicon atoms, one around  $\delta$  10.84 which was assigned to  $\text{SiMe}_3$  group and the second one around  $\delta$  47.33, assigned to the centred oxygenated Si atom. This chemical shift agrees with the oxygenated silicone atoms (please see the references in the manuscript). The characteristic Si=O stretching vibration was found at  $1196\text{ cm}^{-1}$  for both compounds (**Figure S20**), which is in good agreement with the calculated value ( $\nu_{\text{Si=O}}=1183\text{ cm}^{-1}$ ) and comparable to other Si=O containing structures.<sup>9-</sup>

<sup>11</sup> The GIAO-derived  $^{29}\text{Si}$  NMR chemical shift for silanone showed a chemical shift of  $362.998-315.789 = 47.209$  ppm related to Si=O motive (with respect to tetramethylsilane), which aligns well with the experimental value. For the  $\text{SiMe}_3$  group, a shift of 23.553 ppm ( $339.342 - 315.789$  ppm) was observed, which is slightly higher than the experimentally determined value.

$^1\text{H}$  NMR (400 MHz,  $\text{C}_6\text{D}_6$ )  $\delta$  = 7.44-7.40 (m, 1H, ArH), 6.91-6.87 (m, 1H, ArH), 6.82-6.77 (m, 3H, ArH), 1.12 (s, 18H, N-<sup>t</sup>Bu), 0.35 (s, 9H,  $\text{SiMe}_3$ ).

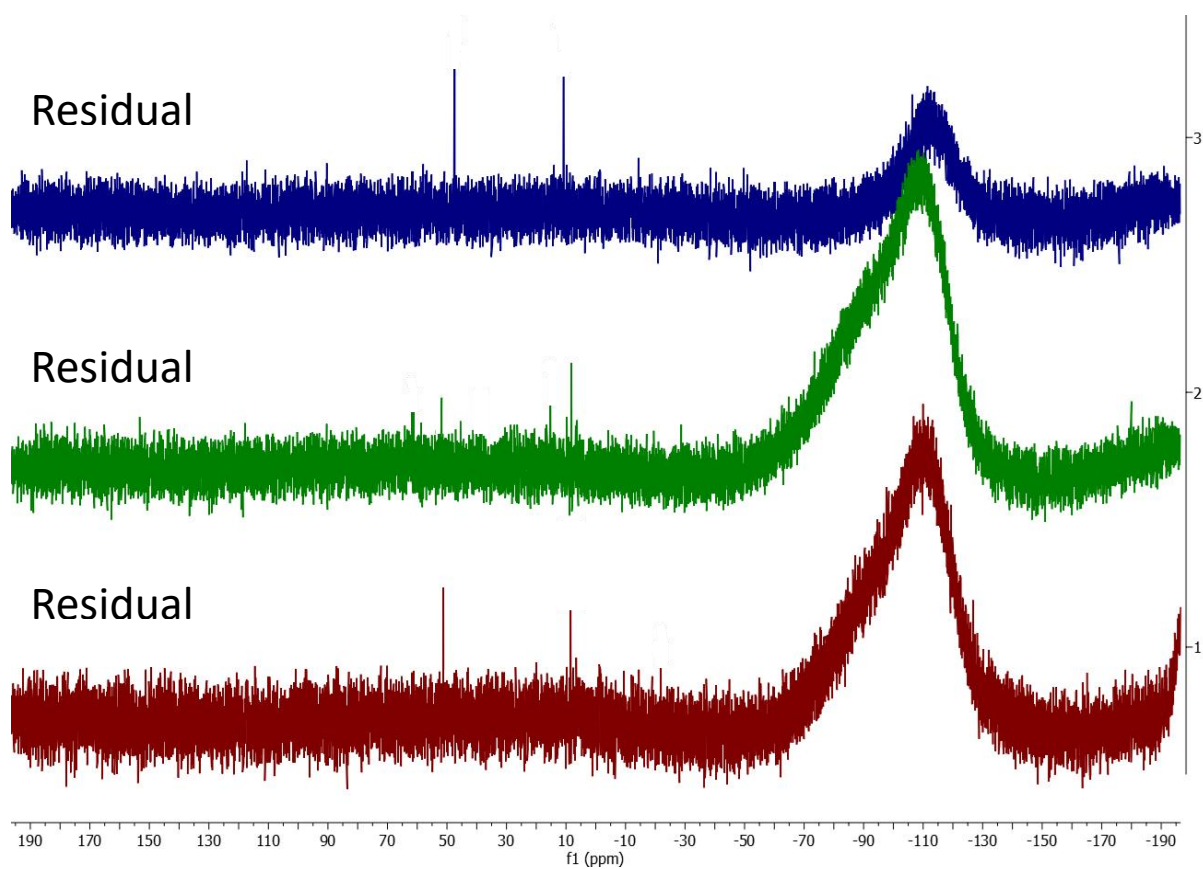

**Figure S33.**  $^{29}\text{Si}$  NMR spectrum of the residual reaction mixture of the products in  $\text{C}_6\text{D}_6$ .

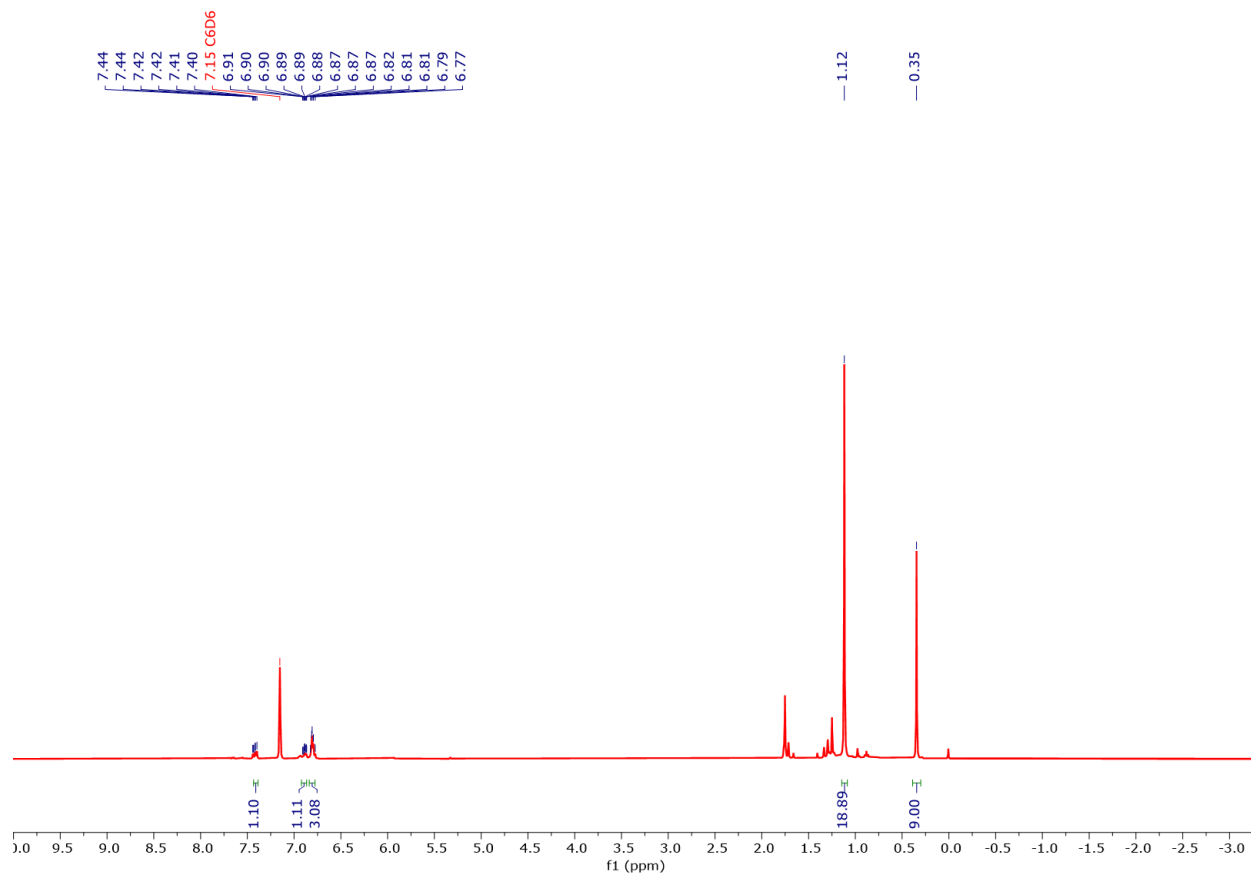

**Figure S34.**  $^1\text{H}$  NMR spectrum of Side product in  $\text{C}_6\text{D}_6$

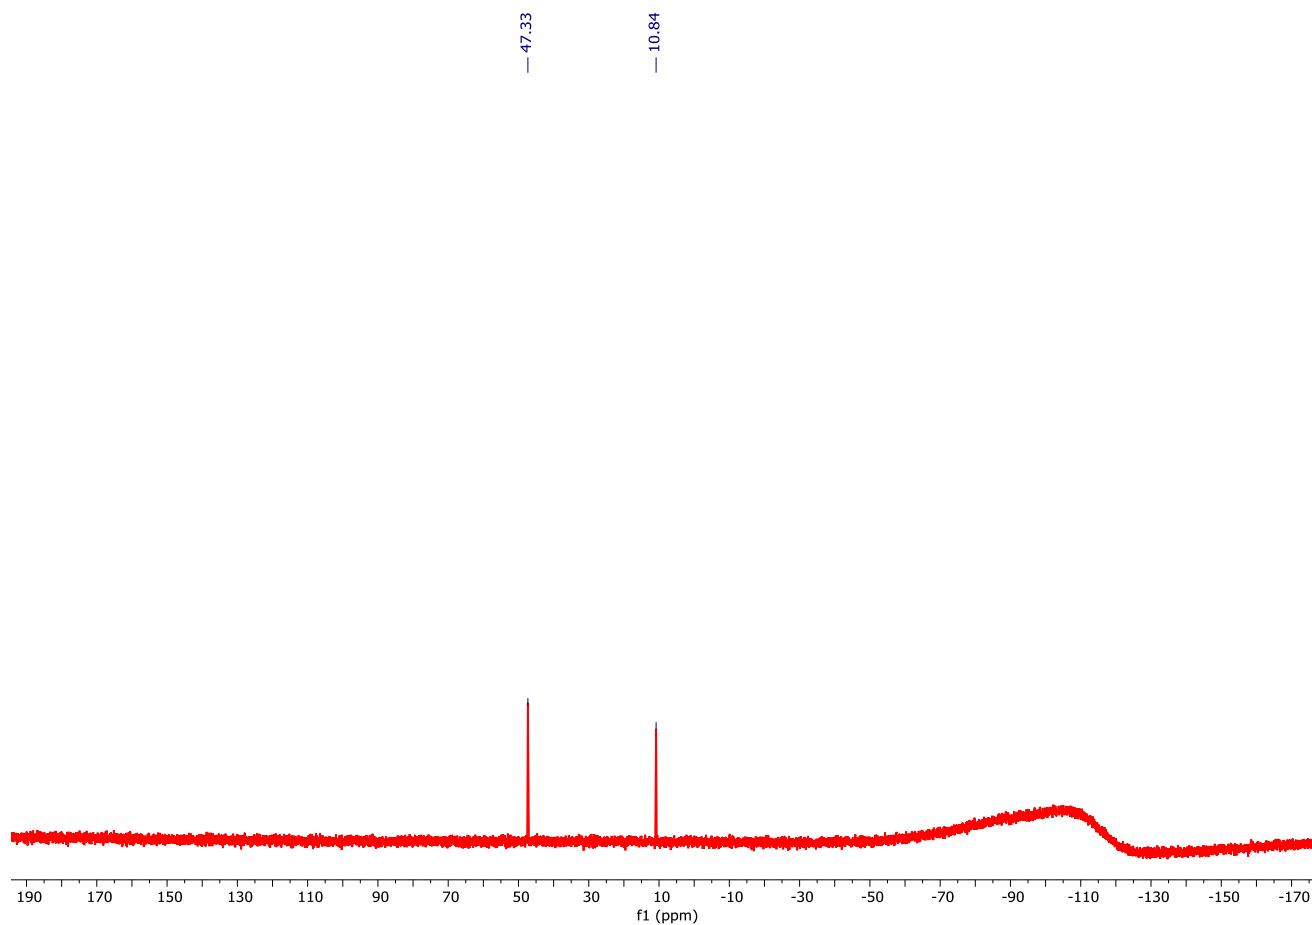

**Figure S35.**  $^{29}\text{Si}$  NMR spectrum of **Side product** in  $\text{C}_6\text{D}_6$

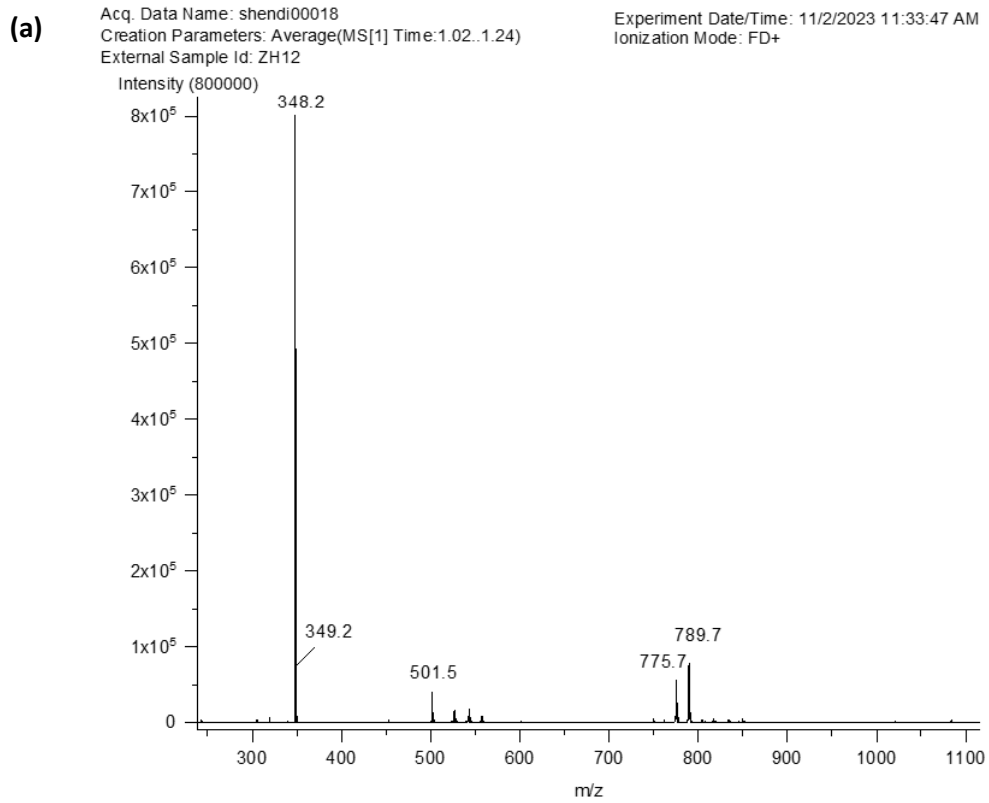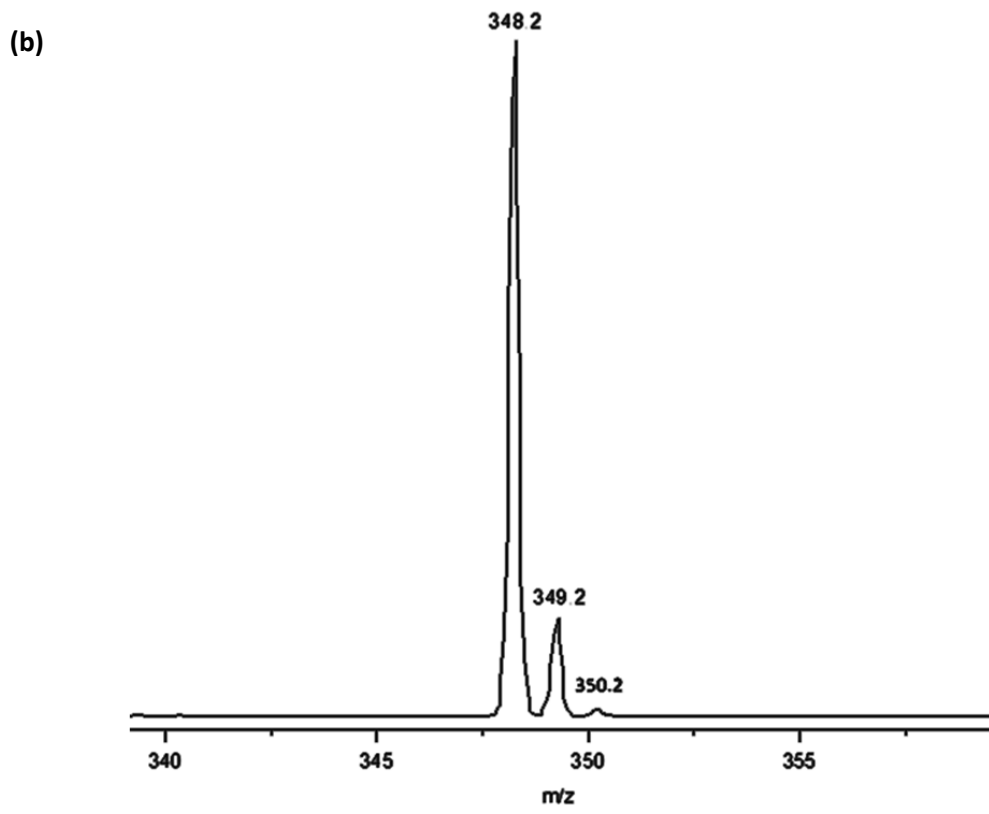

**Figure S36:** (a) LIFDI spectrum of the side product, (b) expansion of the pattern

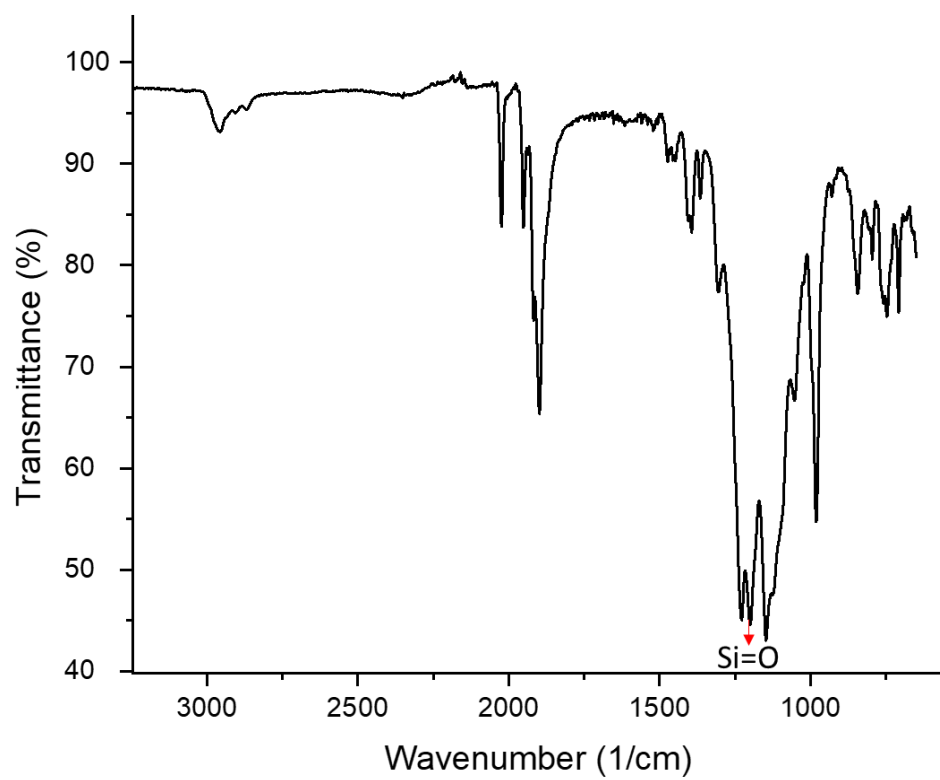

**Figure S37:** IR spectrum of the side product ( $\text{cm}^{-1}$ ). Exp.  $\nu$  [ $\text{cm}^{-1}$ ] Si=O; 1196, Cal.  $\nu$  [ $\text{cm}^{-1}$ ] Si=O; 1183.

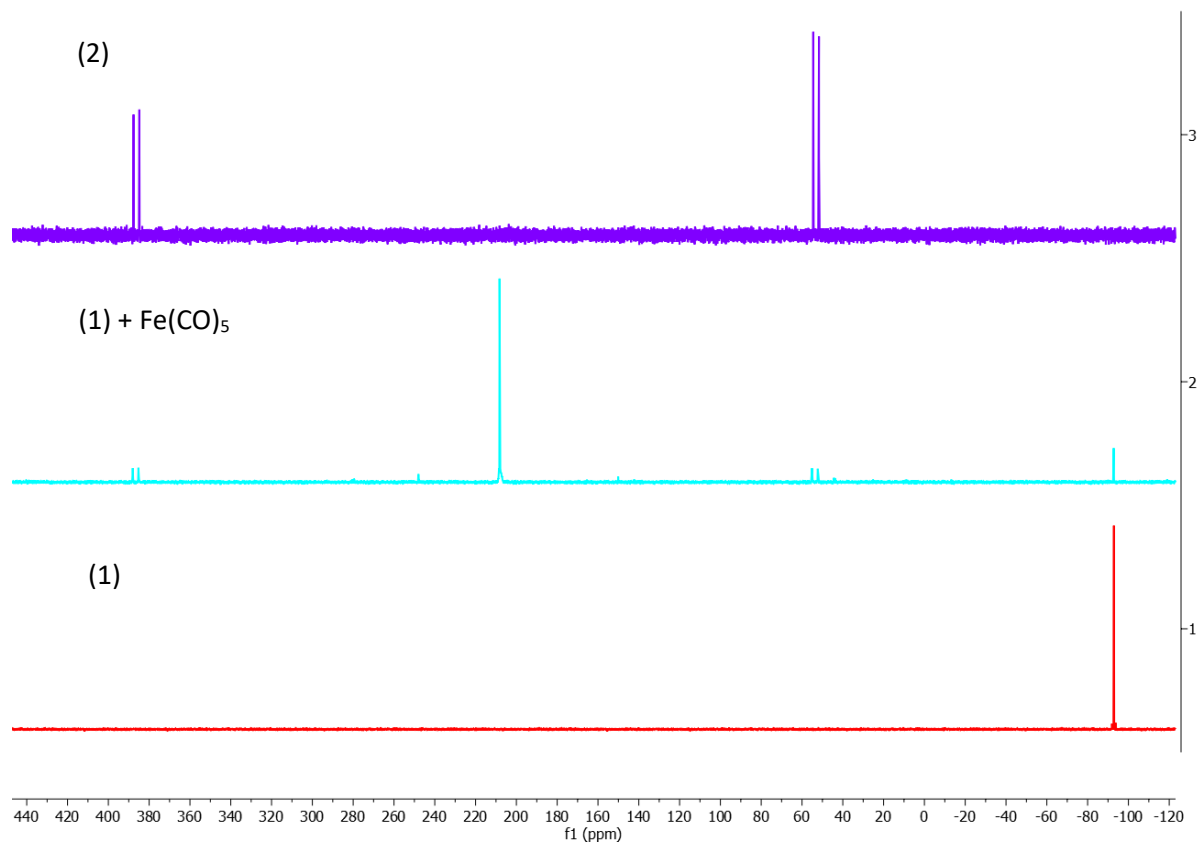

Figure S38.  $^{31}\text{P}$ -NMR monitoring the reaction of **1** with  $\text{Fe}(\text{CO})_5$ .

## **X-ray Structure Determination.**

### **I. General Data Acquisition and Processing for 1, 3 and 4.**

The diffraction data were collected using Mo K $\alpha$  radiation and a Bruker Photon II detector. The data were integrated with SAINT.<sup>3</sup> A multi-scan absorption correction was applied using SADABS.<sup>4</sup> The structures were solved by SHELXT<sup>5</sup> and refined on F<sup>2</sup> using SHELXL<sup>6</sup> in the graphical user interface ShelXle.<sup>7</sup> All hydrogen atoms were placed with a riding model. An overview of the crystallographic data for **1** can be found in **Table S1**, while individual bond lengths and angles are listed in **Table S2, S4 and S5**.

### **II. General Data Acquisition and Processing for 2.**

A single-crystal of **2** suitable for X-ray diffraction analysis was mounted on a Cryoloop with a drop of Paratone oil and placed in the cold nitrogen stream on the STADIVARI diffractometer. The data was collected at 100 K using a Mo K $\alpha$  radiation source with the  $\omega$ -scan technique and a EIGER2 R500 detector (Dectris Ltd, Switzerland). The data were integrated with STOE.<sup>8</sup> A multi-scan absorption correction was applied using STOE LANA.<sup>8</sup> The structures were solved by SHELXT<sup>5</sup> and refined on F<sup>2</sup> using SHELXL<sup>6</sup> in the graphical user interface ShelXle.<sup>7</sup> All hydrogen atoms were placed with a riding model. An overview of the crystallographic data for **2** can be found in **Table S1**, while individual bond lengths and angles are listed in **Table S3**.



**Table S1: Crystal data and structure refinement details for 1-4.**

|                                                             | <b>1</b>                                                          | <b>2</b>                                                                                       | <b>3</b>                                                                                         | <b>4</b>                                                                                        |
|-------------------------------------------------------------|-------------------------------------------------------------------|------------------------------------------------------------------------------------------------|--------------------------------------------------------------------------------------------------|-------------------------------------------------------------------------------------------------|
| Formula                                                     | C <sub>36</sub> H <sub>61</sub> N <sub>2</sub> PSi <sub>2</sub>   | C <sub>59</sub> H <sub>90</sub> FeN <sub>2</sub> O <sub>4</sub> P <sub>2</sub> Si <sub>2</sub> | C <sub>90</sub> H <sub>120</sub> N <sub>2</sub> O <sub>5</sub> P <sub>2</sub> Si <sub>2</sub> Mo | C <sub>90</sub> H <sub>120</sub> N <sub>2</sub> O <sub>5</sub> P <sub>2</sub> Si <sub>2</sub> W |
| no CCDC                                                     | 2311389                                                           | 2279235                                                                                        | 2370052                                                                                          | 2370053                                                                                         |
| Molecular weight                                            | 609.01                                                            | 1065.29                                                                                        | 1523.93                                                                                          | 1611.84                                                                                         |
| Temperature (K)                                             | 100(2)                                                            | 100                                                                                            | 100(2)                                                                                           | 100(2)                                                                                          |
| Wavelength                                                  | 0.71073 Å                                                         | 0.71073 Å                                                                                      | 0.71073 Å                                                                                        | 0.71073 Å                                                                                       |
| Crystal System                                              | Monoclinic                                                        | Triclinic                                                                                      | Orthorhombic                                                                                     | Orthorhombic                                                                                    |
| Crystal size [mm]                                           | 0.132 x 0.118 x 0.053                                             | 0.300 x 0.173 x 0.070                                                                          | 0.189 x 0.109 x 0.035                                                                            | 0.61 x 0.23 x 0.22                                                                              |
| Space group                                                 | <i>P</i> 2 <sub>1</sub> / <i>n</i>                                | <i>P</i> $\bar{1}$                                                                             | <i>P</i> 2 <sub>1</sub> 2 <sub>1</sub> 2 <sub>1</sub>                                            | <i>P</i> 2 <sub>1</sub> 2 <sub>1</sub> 2 <sub>1</sub>                                           |
| <i>a</i> (Å)                                                | 18.994(2)                                                         | 13.3341(7)                                                                                     | 14.748(2)                                                                                        | 14.772(2)                                                                                       |
| <i>b</i> (Å)                                                | 11.672(2)                                                         | 15.4736(9)                                                                                     | 18.855(2)                                                                                        | 18.812(2)                                                                                       |
| <i>c</i> (Å)                                                | 19.431(3)                                                         | 16.8028(9)                                                                                     | 31.225(4)                                                                                        | 31.181(4)                                                                                       |
| $\alpha$ (°)                                                | -                                                                 | 89.148(4)                                                                                      | 90                                                                                               | 90                                                                                              |
| $\beta$ (°)                                                 | 118.39(2)                                                         | 68.098(4)                                                                                      | 90                                                                                               | 90                                                                                              |
| $\gamma$ (°)                                                | -                                                                 | 69.912(4)                                                                                      | 90                                                                                               | 90                                                                                              |
| <i>V</i> (Å <sup>3</sup> )                                  | 3789.7(11)                                                        | 2995.3(3)                                                                                      | 8682.8(19)                                                                                       | 8664.9(19)                                                                                      |
| <i>Z</i>                                                    | 4                                                                 | 2                                                                                              | 4                                                                                                | 4                                                                                               |
| <i>D</i> <sub>calc</sub> (g/cm <sup>3</sup> )               | 1.067                                                             | 1.181                                                                                          | 1.166                                                                                            | 1.236                                                                                           |
| $\mu$ (mm <sup>-1</sup> )                                   | 0.161                                                             | 0.390                                                                                          | 0.265                                                                                            | 1.447                                                                                           |
| <i>F</i> (000)                                              | 1336.0                                                            | 1148.0                                                                                         | 3256                                                                                             | 3384.0                                                                                          |
| Index ranges                                                | -22 ≤ <i>h</i> ≤ 22<br>-13 ≤ <i>k</i> ≤ 13<br>-23 ≤ <i>l</i> ≤ 23 | -14 ≤ <i>h</i> ≤ 16<br>-19 ≤ <i>k</i> ≤ 17<br>-20 ≤ <i>l</i> ≤ 20                              | -18 ≤ <i>h</i> ≤ 18<br>-23 ≤ <i>k</i> ≤ 23<br>-39 ≤ <i>l</i> ≤ 38                                | -19 ≤ <i>h</i> ≤ 19<br>-25 ≤ <i>k</i> ≤ 25<br>41 ≤ <i>l</i> ≤ 41                                |
| Data / restraints / parameters                              | 6704/147/398                                                      | 11773/1213/698                                                                                 | 17772 / 5608 / 1266                                                                              | 21441/5608/1259                                                                                 |
| Angle range 2 $\theta$ (°)                                  | 2.070 to 25.090°                                                  | 2.534 to 26.022                                                                                | 1.693 to 26.414                                                                                  | 1.264 to 28.341°                                                                                |
| Reflection Collected                                        | 60239                                                             | 102143                                                                                         | 198112                                                                                           | 205991                                                                                          |
| Independent Reflection                                      | 6704                                                              | 11773                                                                                          | 17772                                                                                            | 21441                                                                                           |
| <i>R</i> <sub>int</sub>                                     | 0.1570                                                            | 0.1050                                                                                         | 0.0836                                                                                           | 0.0357                                                                                          |
| Refinement method                                           | Full-matrix least-squares on <i>F</i> <sup>2</sup>                | Full-matrix least-squares on <i>F</i> <sup>2</sup>                                             | Full-matrix least-squares on <i>F</i> <sup>2</sup>                                               | Full-matrix least-squares on <i>F</i> <sup>2</sup>                                              |
| Completeness to theta = 25.242°/25.090°(for 1)              | 99.5%                                                             | 99.7%                                                                                          | 99.9%                                                                                            | 99.9%                                                                                           |
| <i>R</i> <sub>1</sub> ( <i>I</i> < 2 $\sigma$ ( <i>I</i> )) | 0.0514                                                            | 0.0576                                                                                         | 0.0436                                                                                           | 0.0207                                                                                          |
| <i>wR</i> <sub>2</sub> (all data)                           | 0.1232                                                            | 0.1975                                                                                         | 0.0994                                                                                           | 0.0504                                                                                          |
| GOOF                                                        | 1.050                                                             | 1.000                                                                                          | 1.043                                                                                            | 1.078                                                                                           |
| Absolute structure parameter                                | -                                                                 | -                                                                                              | 0.47(3)                                                                                          | 0.0057(11)                                                                                      |
| $\rho_{\min}, \rho_{\max}, e/\text{Å}^3$                    | 0.393/-0.287                                                      | 1.227/-1.272                                                                                   | 0.682/ -0.497                                                                                    | 1.692/-0.700                                                                                    |

$R_1 = \frac{\sum ||F_o| - |F_c||}{\sum |F_o|}$ ;  $wR_2 = \left\{ \frac{\sum [w(F_o^2 - F_c^2)^2]}{\sum [w(F_o^2)^2]} \right\}^{1/2}$ ;  $w = 1/[\sigma^2(F_o^2) + (aP)^2 + bP]$ , where  $P = (F_o^2 + 2F_c^2)/3$ ;  $s = \left\{ \frac{\sum [w(F_o^2 - F_c^2)]}{(n - p)} \right\}^{1/2}$  where *n* is the number of reflections and *p* is the number of refinement parameters.

## Crystal structure of 1

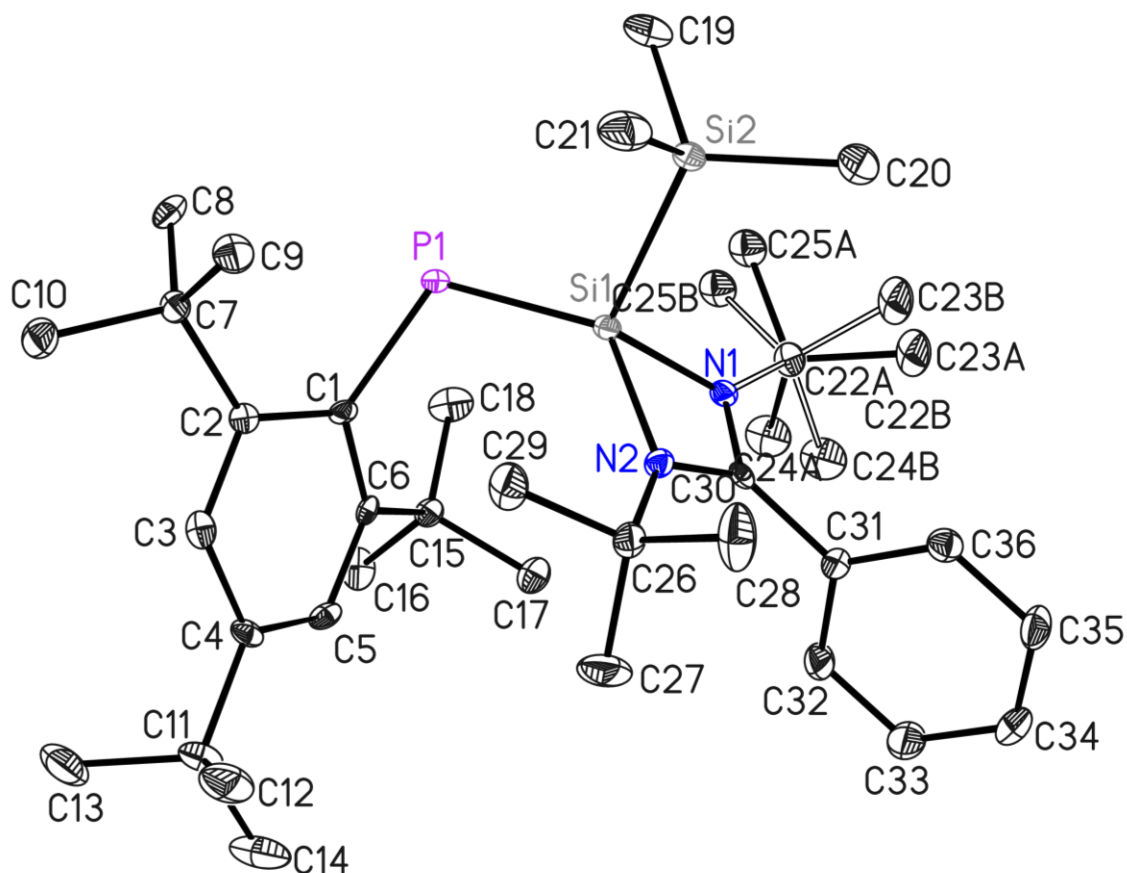

**Figure S39:** Asymmetric unit of **1** with thermal ellipsoids shown at 50% probability level. Hydrogen atoms are omitted for clarity. One *tert*-butyl group is disordered over two positions and was refined with distance restraints and restraints for the anisotropic displacement parameters. The occupancy of the minor component refined to 0.152(6). Selected bond lengths (Å) and bond angles (°). P1–C1 1.874(2), P1–Si1 2.1250(10), N1–Si1 1.888(2), N2–Si1 1.833(2), Si1–Si2 2.3501(12), N1–Si1–N2 70.39(9), N1–Si1–Si2 106.67(7), N2–Si1–Si2 110.16(8), P1–Si1–Si2 104.80(4), C1–P1–Si1 109.30(8).

**Table S2.** Bond length [Å] and angles [°] for **1**.

|               |            |                   |            |
|---------------|------------|-------------------|------------|
| P(1)-C(1)     | 1.874(2)   | C(22B)-C(25B)     | 1.498(11)  |
| P(1)-Si(1)    | 2.1250(10) | C(22B)-C(24B)     | 1.527(11)  |
| Si(1)-N(2)    | 1.833(2)   | C(22B)-C(23B)     | 1.546(12)  |
| Si(1)-N(1)    | 1.888(2)   | C(26)-C(27)       | 1.524(4)   |
| Si(1)-C(30)   | 2.313(3)   | C(26)-C(29)       | 1.526(4)   |
| Si(1)-Si(2)   | 2.3501(12) | C(26)-C(28)       | 1.527(4)   |
| Si(2)-C(20)   | 1.871(3)   | C(30)-C(31)       | 1.489(4)   |
| Si(2)-C(21)   | 1.875(3)   | C(31)-C(36)       | 1.385(4)   |
| Si(2)-C(19)   | 1.877(3)   | C(31)-C(32)       | 1.388(4)   |
| N(2)-C(30)    | 1.344(3)   | C(32)-C(33)       | 1.384(4)   |
| N(2)-C(26)    | 1.482(3)   | C(33)-C(34)       | 1.376(4)   |
| C(1)-C(6)     | 1.422(3)   | C(34)-C(35)       | 1.383(4)   |
| C(1)-C(2)     | 1.439(3)   | C(35)-C(36)       | 1.384(4)   |
| C(2)-C(3)     | 1.386(3)   |                   |            |
| C(2)-C(7)     | 1.557(3)   | C(1)-P(1)-Si(1)   | 109.30(8)  |
| C(3)-C(4)     | 1.396(4)   | N(2)-Si(1)-N(1)   | 70.39(9)   |
| C(4)-C(5)     | 1.381(4)   | N(2)-Si(1)-P(1)   | 127.74(7)  |
| C(4)-C(11)    | 1.534(3)   | N(1)-Si(1)-P(1)   | 133.12(8)  |
| C(5)-C(6)     | 1.403(3)   | N(2)-Si(1)-C(30)  | 35.48(9)   |
| C(6)-C(15)    | 1.552(3)   | N(1)-Si(1)-C(30)  | 35.04(9)   |
| C(7)-C(9)     | 1.534(4)   | P(1)-Si(1)-C(30)  | 144.76(7)  |
| C(7)-C(8)     | 1.535(4)   | N(2)-Si(1)-Si(2)  | 110.16(8)  |
| C(7)-C(10)    | 1.542(4)   | N(1)-Si(1)-Si(2)  | 106.67(7)  |
| C(11)-C(14)   | 1.526(4)   | P(1)-Si(1)-Si(2)  | 104.80(4)  |
| C(11)-C(12)   | 1.530(4)   | C(30)-Si(1)-Si(2) | 110.41(7)  |
| C(11)-C(13)   | 1.538(4)   | C(20)-Si(2)-C(21) | 106.22(15) |
| C(15)-C(17)   | 1.523(4)   | C(20)-Si(2)-C(19) | 110.12(14) |
| C(15)-C(18)   | 1.530(3)   | C(21)-Si(2)-C(19) | 110.49(14) |
| C(15)-C(16)   | 1.549(4)   | C(20)-Si(2)-Si(1) | 113.19(10) |
| N(1)-C(30)    | 1.328(3)   | C(21)-Si(2)-Si(1) | 109.04(10) |
| N(1)-C(22B)   | 1.496(3)   | C(19)-Si(2)-Si(1) | 107.78(10) |
| N(1)-C(22A)   | 1.496(3)   | C(30)-N(2)-C(26)  | 130.8(2)   |
| C(22A)-C(23A) | 1.519(4)   | C(30)-N(2)-Si(1)  | 92.15(15)  |
| C(22A)-C(25A) | 1.527(4)   | C(26)-N(2)-Si(1)  | 137.06(17) |
| C(22A)-C(24A) | 1.541(4)   | C(6)-C(1)-C(2)    | 116.6(2)   |

|                   |            |                      |            |
|-------------------|------------|----------------------|------------|
| C(6)-C(1)-P(1)    | 125.83(19) | N(1)-C(22A)-C(23A)   | 113.3(2)   |
| C(2)-C(1)-P(1)    | 116.94(18) | N(1)-C(22A)-C(25A)   | 106.0(2)   |
| C(3)-C(2)-C(1)    | 118.6(2)   | C(23A)-C(22A)-C(25A) | 109.4(2)   |
| C(3)-C(2)-C(7)    | 117.2(2)   | N(1)-C(22A)-C(24A)   | 110.7(2)   |
| C(1)-C(2)-C(7)    | 124.2(2)   | C(23A)-C(22A)-C(24A) | 109.0(3)   |
| C(2)-C(3)-C(4)    | 123.6(2)   | C(25A)-C(22A)-C(24A) | 108.2(3)   |
| C(5)-C(4)-C(3)    | 115.8(2)   | N(1)-C(22B)-C(25B)   | 106.1(8)   |
| C(5)-C(4)-C(11)   | 123.8(2)   | N(1)-C(22B)-C(24B)   | 109.6(7)   |
| C(3)-C(4)-C(11)   | 120.3(2)   | C(25B)-C(22B)-C(24B) | 112.6(10)  |
| C(4)-C(5)-C(6)    | 123.4(2)   | N(1)-C(22B)-C(23B)   | 106.1(8)   |
| C(5)-C(6)-C(1)    | 118.7(2)   | C(25B)-C(22B)-C(23B) | 113.8(10)  |
| C(5)-C(6)-C(15)   | 114.6(2)   | C(24B)-C(22B)-C(23B) | 108.3(10)  |
| C(1)-C(6)-C(15)   | 126.6(2)   | N(2)-C(26)-C(27)     | 110.6(2)   |
| C(9)-C(7)-C(8)    | 110.2(2)   | N(2)-C(26)-C(29)     | 106.3(2)   |
| C(9)-C(7)-C(10)   | 107.2(2)   | C(27)-C(26)-C(29)    | 108.5(2)   |
| C(8)-C(7)-C(10)   | 105.4(2)   | N(2)-C(26)-C(28)     | 110.4(2)   |
| C(9)-C(7)-C(2)    | 111.1(2)   | C(27)-C(26)-C(28)    | 110.8(2)   |
| C(8)-C(7)-C(2)    | 112.0(2)   | C(29)-C(26)-C(28)    | 110.1(2)   |
| C(10)-C(7)-C(2)   | 110.6(2)   | N(1)-C(30)-N(2)      | 106.8(2)   |
| C(14)-C(11)-C(12) | 107.7(2)   | N(1)-C(30)-C(31)     | 126.5(2)   |
| C(14)-C(11)-C(4)  | 112.1(2)   | N(2)-C(30)-C(31)     | 126.6(2)   |
| C(12)-C(11)-C(4)  | 109.3(2)   | N(1)-C(30)-Si(1)     | 54.69(13)  |
| C(14)-C(11)-C(13) | 108.8(2)   | N(2)-C(30)-Si(1)     | 52.37(12)  |
| C(12)-C(11)-C(13) | 108.8(2)   | C(31)-C(30)-Si(1)    | 174.08(19) |
| C(4)-C(11)-C(13)  | 110.0(2)   | C(36)-C(31)-C(32)    | 119.5(2)   |
| C(17)-C(15)-C(18) | 109.5(2)   | C(36)-C(31)-C(30)    | 120.0(2)   |
| C(17)-C(15)-C(16) | 108.2(2)   | C(32)-C(31)-C(30)    | 120.5(2)   |
| C(18)-C(15)-C(16) | 104.6(2)   | C(33)-C(32)-C(31)    | 120.0(3)   |
| C(17)-C(15)-C(6)  | 110.4(2)   | C(34)-C(33)-C(32)    | 120.3(3)   |
| C(18)-C(15)-C(6)  | 115.3(2)   | C(33)-C(34)-C(35)    | 120.0(3)   |
| C(16)-C(15)-C(6)  | 108.4(2)   | C(34)-C(35)-C(36)    | 120.1(3)   |
| C(30)-N(1)-C(22B) | 131.0(2)   | C(35)-C(36)-C(31)    | 120.1(3)   |
| C(30)-N(1)-C(22A) | 131.0(2)   |                      |            |
| C(30)-N(1)-Si(1)  | 90.27(16)  |                      |            |
| C(22B)-N(1)-Si(1) | 136.94(16) |                      |            |
| C(22A)-N(1)-Si(1) | 136.94(16) |                      |            |

## Crystal structure of **2**.

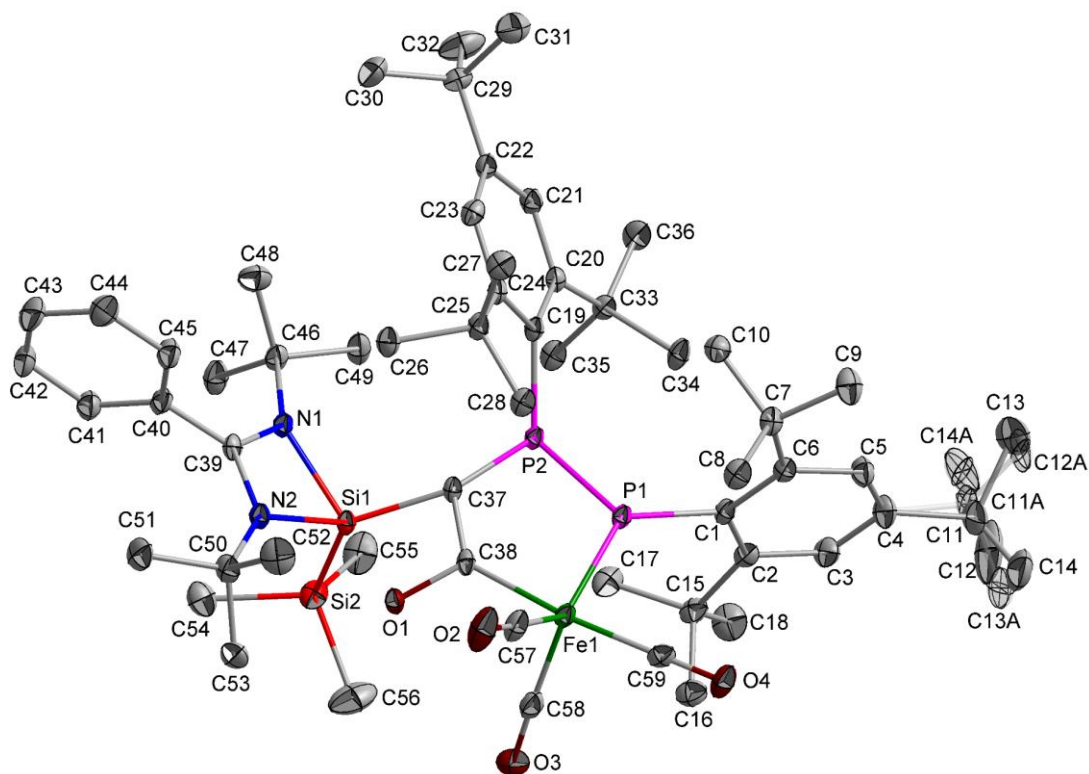

**Figure S40:** Asymmetric unit of **2** with thermal ellipsoids shown at 50% probability level. Hydrogen atoms are omitted for clarity. One *tert*-butyl group is disordered over two positions and was refined with distance restraints and restraints for the anisotropic displacement parameters. The occupancy of the minor component was refined to 0.364(6). Selected bond lengths (Å) and bond angles (°). Fe1–P1 2.1133(7), Fe1–C38 1.982(3), Fe1–C57 1.803(3), C57–O2 1.134(3), O1–Si1 1.8093(19), Si1–Si2 2.3453(10), C37–C38 1.371(4), C38–O1 1.366(3)Å, P1–P2 2.2028(9), C1–P1–P2 116.60(8).

**Table S3.** Bond length [ $\text{\AA}$ ] and angles [ $^\circ$ ] for **2**.

|             |            |             |           |
|-------------|------------|-------------|-----------|
| Fe(1)-P(1)  | 2.1133(7)  | C(50)-C(51) | 1.526(4)  |
| Fe(1)-C(38) | 1.982(3)   | C(38)-C(37) | 1.371(4)  |
| Fe(1)-C(58) | 1.779(3)   | C(46)-C(48) | 1.525(4)  |
| Fe(1)-C(59) | 1.805(3)   | C(46)-C(49) | 1.524(3)  |
| Fe(1)-C(57) | 1.803(3)   | C(46)-C(47) | 1.527(4)  |
| Si(2)-Si(1) | 2.3453(10) | C(1)-C(6)   | 1.419(4)  |
| Si(2)-C(56) | 1.862(4)   | C(1)-C(2)   | 1.445(3)  |
| Si(2)-C(55) | 1.881(3)   | C(6)-C(5)   | 1.393(3)  |
| Si(2)-C(54) | 1.888(3)   | C(6)-C(7)   | 1.553(3)  |
| O(1)-Si(1)  | 1.8093(19) | C(5)-C(4)   | 1.371(4)  |
| O(1)-C(38)  | 1.366(3)   | C(4)-C(3)   | 1.371(4)  |
| N(1)-Si(1)  | 1.975(2)   | C(4)-C(11)  | 1.553(7)  |
| N(1)-C(39)  | 1.317(3)   | C(4)-C(11A) | 1.546(10) |
| N(1)-C(46)  | 1.479(3)   | C(3)-C(2)   | 1.400(4)  |
| C(40)-C(41) | 1.388(4)   | C(2)-C(15)  | 1.562(4)  |
| C(40)-C(45) | 1.393(4)   | C(19)-C(24) | 1.436(3)  |
| C(40)-C(39) | 1.497(3)   | C(19)-C(20) | 1.446(3)  |
| Si(1)-N(2)  | 1.841(2)   | C(24)-C(23) | 1.388(4)  |
| Si(1)-C(39) | 2.369(3)   | C(24)-C(25) | 1.565(3)  |
| Si(1)-C(38) | 2.273(3)   | C(23)-C(22) | 1.381(4)  |
| Si(1)-C(37) | 1.888(2)   | C(22)-C(21) | 1.388(4)  |
| O(3)-C(58)  | 1.154(4)   | C(22)-C(29) | 1.534(4)  |
| N(2)-C(39)  | 1.340(3)   | C(21)-C(20) | 1.377(4)  |
| N(2)-C(50)  | 1.489(3)   | C(20)-C(33) | 1.559(3)  |
| C(41)-C(42) | 1.390(4)   | C(7)-C(9)   | 1.538(4)  |
| P(1)-P(2)   | 2.2028(9)  | C(7)-C(8)   | 1.535(3)  |
| P(1)-C(1)   | 1.845(2)   | C(7)-C(10)  | 1.536(4)  |
| O(4)-C(59)  | 1.144(3)   | C(11)-C(12) | 1.523(9)  |
| C(42)-C(43) | 1.380(5)   | C(11)-C(13) | 1.511(9)  |
| P(2)-C(37)  | 1.759(2)   | C(11)-C(14) | 1.523(9)  |
| P(2)-C(19)  | 1.859(3)   | C(15)-C(16) | 1.523(4)  |
| O(2)-C(57)  | 1.134(3)   | C(15)-C(18) | 1.547(4)  |
| C(43)-C(44) | 1.380(4)   | C(15)-C(17) | 1.547(4)  |
| C(44)-C(45) | 1.383(4)   | C(25)-C(26) | 1.540(3)  |
| C(50)-C(52) | 1.520(4)   | C(25)-C(28) | 1.531(4)  |
| C(50)-C(53) | 1.533(4)   | C(25)-C(27) | 1.530(4)  |

|                   |            |                   |            |
|-------------------|------------|-------------------|------------|
| C(29)-C(30)       | 1.520(4)   | O(1)-Si(1)-C(38)  | 36.93(8)   |
| C(29)-C(31)       | 1.535(4)   | O(1)-Si(1)-C(37)  | 73.81(9)   |
| C(29)-C(32)       | 1.533(4)   | N(1)-Si(1)-Si(2)  | 99.84(7)   |
| C(33)-C(35)       | 1.528(4)   | N(1)-Si(1)-C(39)  | 33.76(9)   |
| C(33)-C(36)       | 1.549(4)   | N(1)-Si(1)-C(38)  | 140.64(10) |
| C(33)-C(34)       | 1.533(4)   | N(2)-Si(1)-Si(2)  | 110.97(7)  |
| C(13A)-C(11A)     | 1.502(14)  | N(2)-Si(1)-N(1)   | 68.03(9)   |
| C(11A)-C(12A)     | 1.512(13)  | N(2)-Si(1)-C(39)  | 34.28(9)   |
| C(11A)-C(14A)     | 1.528(13)  | N(2)-Si(1)-C(38)  | 119.20(9)  |
|                   |            | N(2)-Si(1)-C(37)  | 130.35(10) |
| C(38)-Fe(1)-P(1)  | 83.94(7)   | C(38)-Si(1)-Si(2) | 110.91(7)  |
| C(58)-Fe(1)-P(1)  | 127.79(9)  | C(38)-Si(1)-C(39) | 140.27(9)  |
| C(58)-Fe(1)-C(38) | 89.03(12)  | C(37)-Si(1)-Si(2) | 118.44(8)  |
| C(58)-Fe(1)-C(59) | 94.25(12)  | C(37)-Si(1)-N(1)  | 106.45(10) |
| C(58)-Fe(1)-C(57) | 99.81(13)  | C(37)-Si(1)-C(39) | 124.69(10) |
| C(59)-Fe(1)-P(1)  | 89.45(8)   | C(37)-Si(1)-C(38) | 37.04(10)  |
| C(59)-Fe(1)-C(38) | 173.32(11) | C(39)-N(2)-Si(1)  | 94.97(15)  |
| C(57)-Fe(1)-P(1)  | 130.89(10) | C(39)-N(2)-C(50)  | 131.4(2)   |
| C(57)-Fe(1)-C(38) | 85.71(11)  | C(50)-N(2)-Si(1)  | 133.62(18) |
| C(57)-Fe(1)-C(59) | 99.44(12)  | C(40)-C(41)-C(42) | 119.6(3)   |
| C(56)-Si(2)-Si(1) | 109.29(11) | Fe(1)-P(1)-P(2)   | 111.04(3)  |
| C(56)-Si(2)-C(55) | 105.53(17) | C(1)-P(1)-Fe(1)   | 127.14(9)  |
| C(56)-Si(2)-C(54) | 108.65(17) | C(1)-P(1)-P(2)    | 116.60(8)  |
| C(55)-Si(2)-Si(1) | 113.73(11) | C(43)-C(42)-C(41) | 120.5(3)   |
| C(55)-Si(2)-C(54) | 110.44(14) | C(37)-P(2)-P(1)   | 92.89(9)   |
| C(54)-Si(2)-Si(1) | 109.05(10) | C(37)-P(2)-C(19)  | 113.80(11) |
| C(38)-O(1)-Si(1)  | 90.32(15)  | C(19)-P(2)-P(1)   | 119.93(8)  |
| C(39)-N(1)-Si(1)  | 89.76(16)  | C(42)-C(43)-C(44) | 120.0(3)   |
| C(39)-N(1)-C(46)  | 128.8(2)   | C(43)-C(44)-C(45) | 120.1(3)   |
| C(46)-N(1)-Si(1)  | 140.72(17) | C(44)-C(45)-C(40) | 120.2(3)   |
| C(41)-C(40)-C(45) | 119.6(2)   | N(1)-C(39)-C(40)  | 126.4(2)   |
| C(41)-C(40)-C(39) | 121.4(2)   | N(1)-C(39)-Si(1)  | 56.48(13)  |
| C(45)-C(40)-C(39) | 118.9(2)   | N(1)-C(39)-N(2)   | 107.2(2)   |
| Si(2)-Si(1)-C(39) | 107.87(7)  | C(40)-C(39)-Si(1) | 176.58(19) |
| O(1)-Si(1)-Si(2)  | 99.20(7)   | N(2)-C(39)-C(40)  | 126.3(2)   |
| O(1)-Si(1)-N(1)   | 157.84(9)  | N(2)-C(39)-Si(1)  | 50.74(12)  |
| O(1)-Si(1)-N(2)   | 94.53(9)   | N(2)-C(50)-C(52)  | 108.2(2)   |
| O(1)-Si(1)-C(39)  | 127.78(9)  | N(2)-C(50)-C(53)  | 107.9(2)   |

|                   |            |                   |          |
|-------------------|------------|-------------------|----------|
| N(2)-C(50)-C(51)  | 113.7(2)   | C(19)-C(24)-C(25) | 129.5(2) |
| C(52)-C(50)-C(53) | 110.5(2)   | C(23)-C(24)-C(19) | 117.6(2) |
| C(52)-C(50)-C(51) | 109.8(2)   | C(23)-C(24)-C(25) | 112.9(2) |
| C(51)-C(50)-C(53) | 106.7(2)   | C(22)-C(23)-C(24) | 124.7(2) |
| Fe(1)-C(38)-Si(1) | 169.68(14) | C(23)-C(22)-C(21) | 116.3(3) |
| O(1)-C(38)-Fe(1)  | 119.63(18) | C(23)-C(22)-C(29) | 121.6(2) |
| O(1)-C(38)-Si(1)  | 52.75(11)  | C(21)-C(22)-C(29) | 122.0(2) |
| O(1)-C(38)-C(37)  | 108.5(2)   | C(20)-C(21)-C(22) | 123.7(2) |
| C(37)-C(38)-Fe(1) | 131.85(18) | C(19)-C(20)-C(33) | 125.5(2) |
| C(37)-C(38)-Si(1) | 56.02(13)  | C(21)-C(20)-C(19) | 118.7(2) |
| P(2)-C(37)-Si(1)  | 146.22(15) | C(21)-C(20)-C(33) | 115.7(2) |
| C(38)-C(37)-Si(1) | 86.93(16)  | O(3)-C(58)-Fe(1)  | 176.8(3) |
| C(38)-C(37)-P(2)  | 118.66(18) | O(4)-C(59)-Fe(1)  | 177.8(2) |
| N(1)-C(46)-C(48)  | 113.8(2)   | O(2)-C(57)-Fe(1)  | 176.9(3) |
| N(1)-C(46)-C(49)  | 105.9(2)   | C(9)-C(7)-C(6)    | 112.9(2) |
| N(1)-C(46)-C(47)  | 109.9(2)   | C(8)-C(7)-C(6)    | 111.1(2) |
| C(48)-C(46)-C(47) | 109.8(2)   | C(8)-C(7)-C(9)    | 105.1(2) |
| C(49)-C(46)-C(48) | 108.2(2)   | C(8)-C(7)-C(10)   | 112.1(2) |
| C(49)-C(46)-C(47) | 109.1(2)   | C(10)-C(7)-C(6)   | 109.9(2) |
| C(6)-C(1)-P(1)    | 120.75(18) | C(10)-C(7)-C(9)   | 105.6(2) |
| C(6)-C(1)-C(2)    | 119.5(2)   | C(12)-C(11)-C(4)  | 111.8(5) |
| C(2)-C(1)-P(1)    | 119.57(19) | C(13)-C(11)-C(4)  | 110.2(6) |
| C(1)-C(6)-C(7)    | 125.7(2)   | C(13)-C(11)-C(12) | 108.8(7) |
| C(5)-C(6)-C(1)    | 118.6(2)   | C(13)-C(11)-C(14) | 106.7(7) |
| C(5)-C(6)-C(7)    | 115.7(2)   | C(14)-C(11)-C(4)  | 111.8(5) |
| C(4)-C(5)-C(6)    | 123.2(3)   | C(14)-C(11)-C(12) | 107.3(6) |
| C(5)-C(4)-C(11)   | 118.1(4)   | C(16)-C(15)-C(2)  | 108.3(2) |
| C(5)-C(4)-C(11A)  | 123.5(5)   | C(16)-C(15)-C(18) | 106.4(2) |
| C(3)-C(4)-C(5)    | 117.9(2)   | C(16)-C(15)-C(17) | 109.6(2) |
| C(3)-C(4)-C(11)   | 123.5(4)   | C(18)-C(15)-C(2)  | 111.9(2) |
| C(3)-C(4)-C(11A)  | 118.0(5)   | C(17)-C(15)-C(2)  | 116.3(2) |
| C(4)-C(3)-C(2)    | 124.0(3)   | C(17)-C(15)-C(18) | 103.9(2) |
| C(1)-C(2)-C(15)   | 129.0(2)   | C(26)-C(25)-C(24) | 108.7(2) |
| C(3)-C(2)-C(1)    | 116.8(2)   | C(28)-C(25)-C(24) | 116.9(2) |
| C(3)-C(2)-C(15)   | 114.1(2)   | C(28)-C(25)-C(26) | 108.8(2) |
| C(24)-C(19)-P(2)  | 126.14(18) | C(27)-C(25)-C(24) | 109.5(2) |
| C(24)-C(19)-C(20) | 118.0(2)   | C(27)-C(25)-C(26) | 108.3(2) |
| C(20)-C(19)-P(2)  | 113.91(18) | C(27)-C(25)-C(28) | 104.3(2) |



|                   |          |                      |           |
|-------------------|----------|----------------------|-----------|
| C(22)-C(29)-C(31) | 108.6(2) | C(36)-C(33)-C(20)    | 111.3(2)  |
| C(22)-C(29)-C(32) | 112.4(2) | C(34)-C(33)-C(20)    | 111.0(2)  |
| C(30)-C(29)-C(22) | 110.6(2) | C(34)-C(33)-C(36)    | 104.7(2)  |
| C(30)-C(29)-C(31) | 109.4(3) | C(4)-C(11A)-C(12A)   | 109.9(9)  |
| C(30)-C(29)-C(32) | 108.3(3) | C(13A)-C(11A)-C(4)   | 105.0(8)  |
| C(32)-C(29)-C(31) | 107.4(2) | C(13A)-C(11A)-C(12A) | 111.1(11) |
| C(35)-C(33)-C(20) | 112.1(2) | C(13A)-C(11A)-C(14A) | 109.4(10) |
| C(35)-C(33)-C(36) | 105.9(2) | C(14A)-C(11A)-C(4)   | 111.4(8)  |
| C(35)-C(33)-C(34) | 111.3(2) | C(14A)-C(11A)-C(12A) | 109.9(10) |

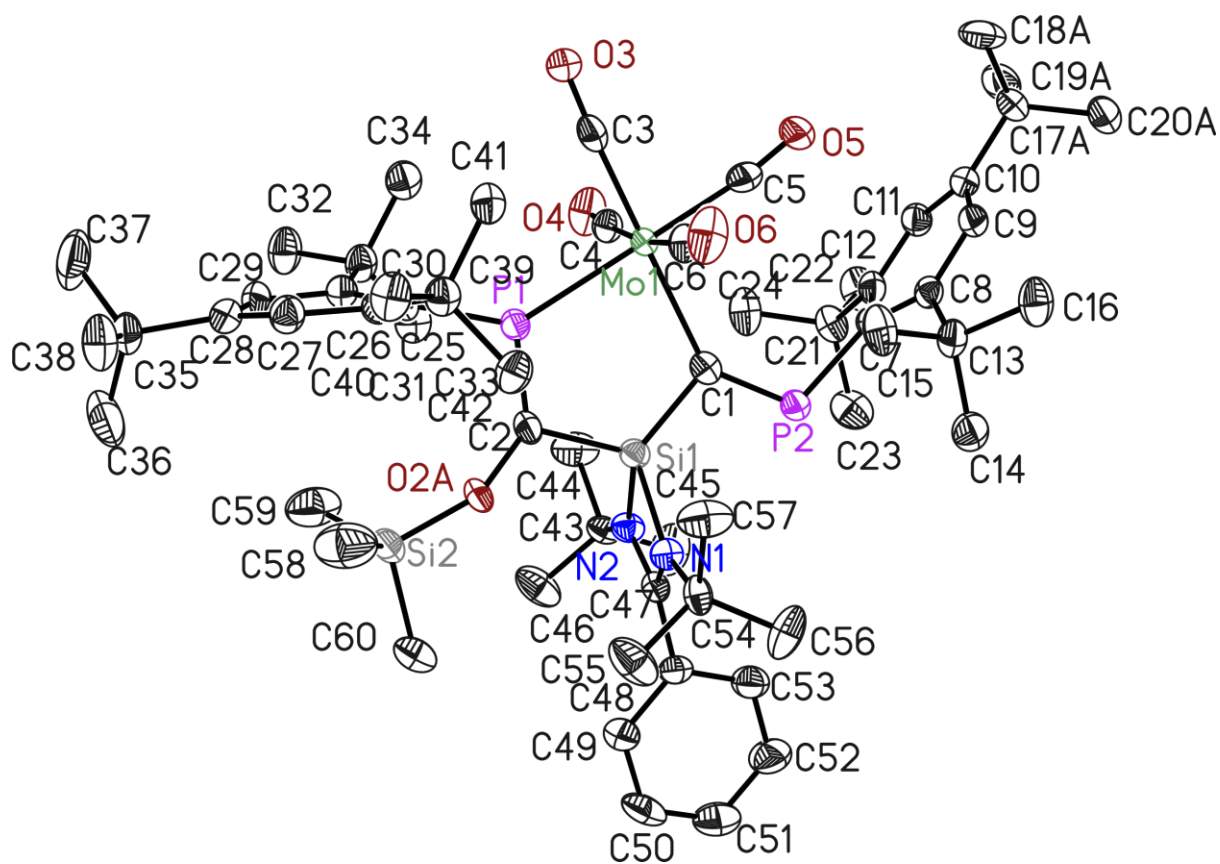

**Figure S41:** Molecular structure of **3** with thermal ellipsoids shown at 50% probability level. Hydrogen atoms are omitted for clarity.

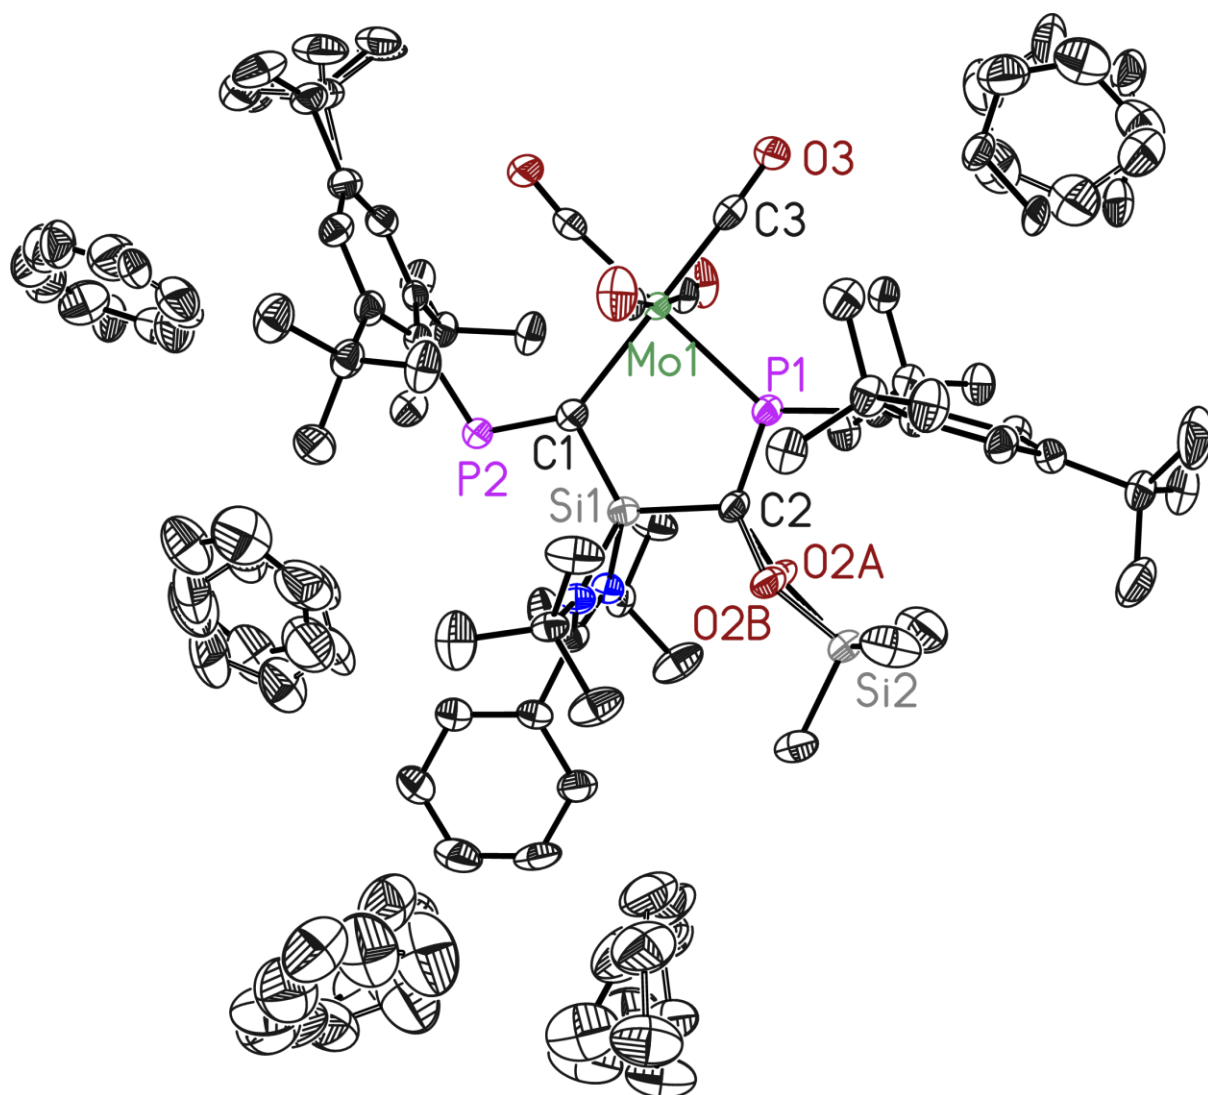

**Figure S42:** Asymmetric unit of **3** with thermal ellipsoids shown at 50% probability level. Hydrogen atoms are omitted for clarity. The structure was refined as an inversion twin with a fractional contribution of the minor component of 0.47(3). One *tert*-butyl group is disordered over two positions. The occupancy of the minor component refined to 0.286(16). The occupancy of the disordered oxygen atom refined to 0.50(4). For the five disordered benzene molecules the occupancies of the minor position refined to 0.264(13), 0.419(15), 0.42(2), 0.29(3) and 0.408(15). All disordered groups were refined with distance restraints and restraints for the anisotropic parameters. Selected bond lengths (Å) and bond angles (°). Mo1–P1 2.5051(11), Mo1–C1 2.323(4), C1–P2 1.679(4), C2–P1 1.678(4), C1–Si1 1.817(4), C2–Si1 1.868(4), C2–O2A 1.401(10), O2a–Si2 1.653(9), P1–Mo1–C1 86.24(10), C1–Si1–C2 115.66(18), P1–C2–Si1 112.7(2), Mo1–C1–Si1 111.93(19), Mo1–P1–C2 113.43(14).

**Table S4.** Bond length [ $\text{\AA}$ ] and angles [ $^\circ$ ] for **3**.

|               |            |             |          |
|---------------|------------|-------------|----------|
| Mo(1)-C(3)    | 1.956(5)   | C(27)-C(28) | 1.391(6) |
| Mo(1)-C(5)    | 1.987(5)   | C(28)-C(29) | 1.380(6) |
| Mo(1)-C(6)    | 2.036(5)   | C(28)-C(35) | 1.536(6) |
| Mo(1)-C(4)    | 2.037(5)   | C(29)-C(30) | 1.397(6) |
| Mo(1)-C(1)    | 2.323(4)   | C(30)-C(39) | 1.553(6) |
| Mo(1)-P(1)    | 2.5051(11) | C(31)-C(32) | 1.537(6) |
| P(2)-C(1)     | 1.679(4)   | C(31)-C(33) | 1.540(7) |
| P(2)-C(7)     | 1.884(4)   | C(31)-C(34) | 1.544(7) |
| C(7)-C(8)     | 1.424(6)   | C(35)-C(37) | 1.517(7) |
| C(7)-C(12)    | 1.430(6)   | C(35)-C(36) | 1.528(7) |
| C(8)-C(9)     | 1.397(6)   | C(35)-C(38) | 1.529(7) |
| C(8)-C(13)    | 1.559(7)   | C(39)-C(42) | 1.535(6) |
| C(9)-C(10)    | 1.387(6)   | C(39)-C(41) | 1.539(7) |
| C(10)-C(11)   | 1.382(6)   | C(39)-C(40) | 1.549(6) |
| C(10)-C(17B)  | 1.542(17)  | Si(1)-C(1)  | 1.817(4) |
| C(10)-C(17A)  | 1.543(8)   | Si(1)-N(1)  | 1.820(4) |
| C(11)-C(12)   | 1.398(6)   | Si(1)-N(2)  | 1.821(4) |
| C(12)-C(21)   | 1.546(6)   | Si(1)-C(2)  | 1.868(4) |
| C(13)-C(15)   | 1.529(6)   | Si(1)-C(47) | 2.278(4) |
| C(13)-C(16)   | 1.532(6)   | N(2)-C(47)  | 1.338(5) |
| C(13)-C(14)   | 1.534(7)   | N(2)-C(43)  | 1.489(5) |
| C(17A)-C(19A) | 1.522(10)  | C(43)-C(45) | 1.508(7) |
| C(17A)-C(18A) | 1.524(10)  | C(43)-C(46) | 1.513(6) |
| C(17A)-C(20A) | 1.541(10)  | C(43)-C(44) | 1.517(6) |
| C(17B)-C(19B) | 1.514(18)  | C(47)-N(1)  | 1.343(5) |
| C(17B)-C(20B) | 1.520(18)  | C(47)-C(48) | 1.475(5) |
| C(17B)-C(18B) | 1.539(18)  | C(48)-C(53) | 1.386(6) |
| C(21)-C(24)   | 1.523(6)   | C(48)-C(49) | 1.394(6) |
| C(21)-C(23)   | 1.545(7)   | C(49)-C(50) | 1.386(6) |
| C(21)-C(22)   | 1.545(6)   | C(50)-C(51) | 1.360(7) |
| P(1)-C(2)     | 1.678(4)   | C(51)-C(52) | 1.387(7) |
| P(1)-C(25)    | 1.851(4)   | C(52)-C(53) | 1.381(6) |
| C(25)-C(30)   | 1.428(6)   | N(1)-C(54)  | 1.505(5) |
| C(25)-C(26)   | 1.441(6)   | C(54)-C(55) | 1.511(7) |
| C(26)-C(27)   | 1.401(6)   | C(54)-C(56) | 1.513(7) |
| C(26)-C(31)   | 1.549(6)   | C(54)-C(57) | 1.535(6) |

|               |           |                 |           |
|---------------|-----------|-----------------|-----------|
| C(2)-O(2B)    | 1.384(10) | C(92C)-C(93C)   | 1.370(17) |
| C(2)-O(2A)    | 1.401(10) | C(93C)-C(94C)   | 1.381(16) |
| O(2A)-Si(2)   | 1.653(9)  | C(94C)-C(95C)   | 1.411(16) |
| O(2B)-Si(2)   | 1.638(9)  | C(90G)-C(91G)   | 1.368(13) |
| Si(2)-C(58)   | 1.820(6)  | C(90G)-C(95G)   | 1.412(14) |
| Si(2)-C(59)   | 1.842(6)  | C(91G)-C(92G)   | 1.369(14) |
| Si(2)-C(60)   | 1.858(5)  | C(92G)-C(93G)   | 1.384(14) |
| O(3)-C(3)     | 1.176(5)  | C(93G)-C(94G)   | 1.376(15) |
| O(4)-C(4)     | 1.146(5)  | C(94G)-C(95G)   | 1.387(15) |
| O(5)-C(5)     | 1.151(5)  | C(90D)-C(95D)   | 1.376(12) |
| O(6)-C(6)     | 1.158(5)  | C(90D)-C(91D)   | 1.379(12) |
| C(90A)-C(95A) | 1.349(11) | C(91D)-C(92D)   | 1.371(12) |
| C(90A)-C(91A) | 1.372(12) | C(92D)-C(93D)   | 1.393(11) |
| C(91A)-C(92A) | 1.365(12) | C(93D)-C(94D)   | 1.395(11) |
| C(92A)-C(93A) | 1.415(13) | C(94D)-C(95D)   | 1.388(11) |
| C(93A)-C(94A) | 1.377(11) | C(90I)-C(95I)   | 1.378(18) |
| C(94A)-C(95A) | 1.370(11) | C(90I)-C(91I)   | 1.383(17) |
| C(90J)-C(91J) | 1.376(17) | C(91I)-C(92I)   | 1.385(17) |
| C(90J)-C(95J) | 1.390(18) | C(92I)-C(93I)   | 1.383(17) |
| C(91J)-C(92J) | 1.362(18) | C(93I)-C(94I)   | 1.385(17) |
| C(92J)-C(93J) | 1.359(18) | C(94I)-C(95I)   | 1.379(18) |
| C(93J)-C(94J) | 1.366(17) | C(90E)-C(91E)   | 1.352(14) |
| C(94J)-C(95J) | 1.387(17) | C(90E)-C(95E)   | 1.388(14) |
| C(90B)-C(95B) | 1.363(15) | C(91E)-C(92E)   | 1.381(13) |
| C(90B)-C(91B) | 1.379(14) | C(92E)-C(93E)   | 1.384(11) |
| C(91B)-C(92B) | 1.397(14) | C(93E)-C(94E)   | 1.391(11) |
| C(92B)-C(93B) | 1.404(15) | C(94E)-C(95E)   | 1.409(13) |
| C(93B)-C(94B) | 1.392(13) | C(90F)-C(91F)   | 1.367(16) |
| C(94B)-C(95B) | 1.372(15) | C(90F)-C(95F)   | 1.376(15) |
| C(90H)-C(95H) | 1.366(17) | C(91F)-C(92F)   | 1.377(17) |
| C(90H)-C(91H) | 1.382(16) | C(92F)-C(93F)   | 1.361(16) |
| C(91H)-C(92H) | 1.369(17) | C(93F)-C(94F)   | 1.409(16) |
| C(92H)-C(93H) | 1.384(17) | C(94F)-C(95F)   | 1.384(15) |
| C(93H)-C(94H) | 1.373(17) |                 |           |
| C(94H)-C(95H) | 1.369(17) | C(3)-Mo(1)-C(5) | 86.03(17) |
| C(90C)-C(91C) | 1.390(17) | C(3)-Mo(1)-C(6) | 86.6(2)   |
| C(90C)-C(95C) | 1.395(17) | C(5)-Mo(1)-C(6) | 88.9(2)   |
| C(91C)-C(92C) | 1.382(17) | C(3)-Mo(1)-C(4) | 87.3(2)   |

|                      |            |                      |            |
|----------------------|------------|----------------------|------------|
| C(5)-Mo(1)-C(4)      | 87.6(2)    | C(18A)-C(17A)-C(10)  | 107.3(7)   |
| C(6)-Mo(1)-C(4)      | 173.15(17) | C(20A)-C(17A)-C(10)  | 110.7(7)   |
| C(3)-Mo(1)-C(1)      | 178.8(2)   | C(19B)-C(17B)-C(20B) | 108.5(17)  |
| C(5)-Mo(1)-C(1)      | 93.86(15)  | C(19B)-C(17B)-C(18B) | 107.7(16)  |
| C(6)-Mo(1)-C(1)      | 92.19(18)  | C(20B)-C(17B)-C(18B) | 109.6(19)  |
| C(4)-Mo(1)-C(1)      | 93.90(18)  | C(19B)-C(17B)-C(10)  | 110.7(15)  |
| C(3)-Mo(1)-P(1)      | 93.89(12)  | C(20B)-C(17B)-C(10)  | 107.3(16)  |
| C(5)-Mo(1)-P(1)      | 179.51(17) | C(18B)-C(17B)-C(10)  | 113.0(16)  |
| C(6)-Mo(1)-P(1)      | 91.58(14)  | C(24)-C(21)-C(23)    | 111.7(4)   |
| C(4)-Mo(1)-P(1)      | 91.94(13)  | C(24)-C(21)-C(22)    | 106.7(4)   |
| C(1)-Mo(1)-P(1)      | 86.24(10)  | C(23)-C(21)-C(22)    | 105.0(4)   |
| C(1)-P(2)-C(7)       | 111.28(19) | C(24)-C(21)-C(12)    | 111.3(4)   |
| C(8)-C(7)-C(12)      | 117.9(4)   | C(23)-C(21)-C(12)    | 109.6(4)   |
| C(8)-C(7)-P(2)       | 121.7(3)   | C(22)-C(21)-C(12)    | 112.5(4)   |
| C(12)-C(7)-P(2)      | 120.4(3)   | C(2)-P(1)-C(25)      | 109.22(19) |
| C(9)-C(8)-C(7)       | 118.6(4)   | C(2)-P(1)-Mo(1)      | 113.43(14) |
| C(9)-C(8)-C(13)      | 117.2(4)   | C(25)-P(1)-Mo(1)     | 137.35(13) |
| C(7)-C(8)-C(13)      | 124.1(4)   | C(30)-C(25)-C(26)    | 119.0(3)   |
| C(10)-C(9)-C(8)      | 123.4(4)   | C(30)-C(25)-P(1)     | 120.4(3)   |
| C(11)-C(10)-C(9)     | 116.5(4)   | C(26)-C(25)-P(1)     | 120.4(3)   |
| C(11)-C(10)-C(17B)   | 125.6(9)   | C(27)-C(26)-C(25)    | 117.3(4)   |
| C(9)-C(10)-C(17B)    | 117.7(9)   | C(27)-C(26)-C(31)    | 117.8(4)   |
| C(11)-C(10)-C(17A)   | 121.5(5)   | C(25)-C(26)-C(31)    | 124.7(4)   |
| C(9)-C(10)-C(17A)    | 121.8(5)   | C(28)-C(27)-C(26)    | 123.7(4)   |
| C(10)-C(11)-C(12)    | 123.6(4)   | C(29)-C(28)-C(27)    | 116.8(4)   |
| C(11)-C(12)-C(7)     | 118.4(4)   | C(29)-C(28)-C(35)    | 122.9(4)   |
| C(11)-C(12)-C(21)    | 117.2(4)   | C(27)-C(28)-C(35)    | 120.3(4)   |
| C(7)-C(12)-C(21)     | 124.3(4)   | C(28)-C(29)-C(30)    | 123.7(5)   |
| C(15)-C(13)-C(16)    | 106.8(4)   | C(29)-C(30)-C(25)    | 118.1(4)   |
| C(15)-C(13)-C(14)    | 110.5(4)   | C(29)-C(30)-C(39)    | 117.4(4)   |
| C(16)-C(13)-C(14)    | 106.1(4)   | C(25)-C(30)-C(39)    | 124.3(4)   |
| C(15)-C(13)-C(8)     | 111.4(4)   | C(32)-C(31)-C(33)    | 106.1(4)   |
| C(16)-C(13)-C(8)     | 112.1(4)   | C(32)-C(31)-C(34)    | 106.4(4)   |
| C(14)-C(13)-C(8)     | 109.8(4)   | C(33)-C(31)-C(34)    | 109.7(4)   |
| C(19A)-C(17A)-C(18A) | 108.4(8)   | C(32)-C(31)-C(26)    | 112.2(4)   |
| C(19A)-C(17A)-C(20A) | 109.1(7)   | C(33)-C(31)-C(26)    | 114.3(4)   |
| C(18A)-C(17A)-C(20A) | 107.8(8)   | C(34)-C(31)-C(26)    | 107.8(4)   |
| C(19A)-C(17A)-C(10)  | 113.4(7)   | C(37)-C(35)-C(36)    | 110.3(5)   |

|                   |            |                   |            |
|-------------------|------------|-------------------|------------|
| C(37)-C(35)-C(38) | 108.2(4)   | C(49)-C(48)-C(47) | 122.2(4)   |
| C(36)-C(35)-C(38) | 108.0(4)   | C(50)-C(49)-C(48) | 119.6(4)   |
| C(37)-C(35)-C(28) | 110.2(4)   | C(51)-C(50)-C(49) | 120.3(5)   |
| C(36)-C(35)-C(28) | 108.2(4)   | C(50)-C(51)-C(52) | 120.7(5)   |
| C(38)-C(35)-C(28) | 111.9(4)   | C(53)-C(52)-C(51) | 119.7(5)   |
| C(42)-C(39)-C(41) | 110.8(4)   | C(52)-C(53)-C(48) | 119.9(4)   |
| C(42)-C(39)-C(40) | 105.9(4)   | C(47)-N(1)-C(54)  | 129.9(4)   |
| C(41)-C(39)-C(40) | 106.0(4)   | C(47)-N(1)-Si(1)  | 90.8(2)    |
| C(42)-C(39)-C(30) | 113.5(4)   | C(54)-N(1)-Si(1)  | 139.3(3)   |
| C(41)-C(39)-C(30) | 108.6(4)   | N(1)-C(54)-C(55)  | 110.6(4)   |
| C(40)-C(39)-C(30) | 111.8(4)   | N(1)-C(54)-C(56)  | 110.2(4)   |
| C(1)-Si(1)-N(1)   | 121.51(19) | C(55)-C(54)-C(56) | 113.1(4)   |
| C(1)-Si(1)-N(2)   | 121.05(19) | N(1)-C(54)-C(57)  | 104.1(3)   |
| N(1)-Si(1)-N(2)   | 72.07(14)  | C(55)-C(54)-C(57) | 109.7(4)   |
| C(1)-Si(1)-C(2)   | 115.66(18) | C(56)-C(54)-C(57) | 108.7(4)   |
| N(1)-Si(1)-C(2)   | 109.54(19) | O(2B)-C(2)-P(1)   | 133.0(7)   |
| N(2)-Si(1)-C(2)   | 109.48(19) | O(2A)-C(2)-P(1)   | 129.0(8)   |
| C(1)-Si(1)-C(47)  | 128.95(17) | O(2B)-C(2)-Si(1)  | 113.0(6)   |
| N(1)-Si(1)-C(47)  | 36.14(15)  | O(2A)-C(2)-Si(1)  | 115.6(6)   |
| N(2)-Si(1)-C(47)  | 35.96(15)  | P(1)-C(2)-Si(1)   | 112.7(2)   |
| C(2)-Si(1)-C(47)  | 115.39(17) | C(2)-O(2A)-Si(2)  | 146.5(15)  |
| C(47)-N(2)-C(43)  | 130.0(4)   | C(2)-O(2B)-Si(2)  | 150.8(13)  |
| C(47)-N(2)-Si(1)  | 91.0(2)    | O(2B)-Si(2)-C(58) | 119.9(8)   |
| C(43)-N(2)-Si(1)  | 139.0(3)   | O(2A)-Si(2)-C(58) | 99.6(11)   |
| N(2)-C(43)-C(45)  | 111.2(4)   | O(2B)-Si(2)-C(59) | 102.6(10)  |
| N(2)-C(43)-C(46)  | 111.1(4)   | O(2A)-Si(2)-C(59) | 120.4(7)   |
| C(45)-C(43)-C(46) | 110.3(4)   | C(58)-Si(2)-C(59) | 112.2(3)   |
| N(2)-C(43)-C(44)  | 105.4(3)   | O(2B)-Si(2)-C(60) | 104.3(5)   |
| C(45)-C(43)-C(44) | 109.9(4)   | O(2A)-Si(2)-C(60) | 106.9(5)   |
| C(46)-C(43)-C(44) | 108.7(4)   | C(58)-Si(2)-C(60) | 108.8(3)   |
| N(2)-C(47)-N(1)   | 106.0(3)   | C(59)-Si(2)-C(60) | 108.1(3)   |
| N(2)-C(47)-C(48)  | 126.6(4)   | O(3)-C(3)-Mo(1)   | 177.0(4)   |
| N(1)-C(47)-C(48)  | 127.3(4)   | O(4)-C(4)-Mo(1)   | 174.7(4)   |
| N(2)-C(47)-Si(1)  | 53.1(2)    | O(5)-C(5)-Mo(1)   | 173.0(4)   |
| N(1)-C(47)-Si(1)  | 53.0(2)    | O(6)-C(6)-Mo(1)   | 173.4(4)   |
| C(48)-C(47)-Si(1) | 175.2(3)   | P(2)-C(1)-Si(1)   | 108.0(2)   |
| C(53)-C(48)-C(49) | 119.8(4)   | P(2)-C(1)-Mo(1)   | 140.1(2)   |
| C(53)-C(48)-C(47) | 118.1(4)   | Si(1)-C(1)-Mo(1)  | 111.93(19) |

|                      |           |                      |           |
|----------------------|-----------|----------------------|-----------|
| C(95A)-C(90A)-C(91A) | 120.8(11) | C(91G)-C(90G)-C(95G) | 119.9(13) |
| C(92A)-C(91A)-C(90A) | 119.2(10) | C(90G)-C(91G)-C(92G) | 121.4(13) |
| C(91A)-C(92A)-C(93A) | 120.8(10) | C(91G)-C(92G)-C(93G) | 119.7(14) |
| C(94A)-C(93A)-C(92A) | 118.0(9)  | C(94G)-C(93G)-C(92G) | 119.6(14) |
| C(95A)-C(94A)-C(93A) | 120.0(9)  | C(93G)-C(94G)-C(95G) | 121.5(14) |
| C(90A)-C(95A)-C(94A) | 121.1(10) | C(94G)-C(95G)-C(90G) | 117.8(13) |
| C(91J)-C(90J)-C(95J) | 120(2)    | C(95D)-C(90D)-C(91D) | 120.7(10) |
| C(92J)-C(91J)-C(90J) | 121(2)    | C(92D)-C(91D)-C(90D) | 121.2(10) |
| C(93J)-C(92J)-C(91J) | 117(2)    | C(91D)-C(92D)-C(93D) | 119.1(9)  |
| C(92J)-C(93J)-C(94J) | 123(2)    | C(92D)-C(93D)-C(94D) | 119.5(9)  |
| C(93J)-C(94J)-C(95J) | 119.3(18) | C(95D)-C(94D)-C(93D) | 120.8(9)  |
| C(94J)-C(95J)-C(90J) | 117.4(18) | C(90D)-C(95D)-C(94D) | 118.7(10) |
| C(95B)-C(90B)-C(91B) | 119.8(13) | C(95I)-C(90I)-C(91I) | 121(2)    |
| C(90B)-C(91B)-C(92B) | 118.8(13) | C(90I)-C(91I)-C(92I) | 119(2)    |
| C(91B)-C(92B)-C(93B) | 121.1(13) | C(93I)-C(92I)-C(91I) | 119(2)    |
| C(94B)-C(93B)-C(92B) | 118.3(13) | C(92I)-C(93I)-C(94I) | 122(2)    |
| C(95B)-C(94B)-C(93B) | 119.3(13) | C(95I)-C(94I)-C(93I) | 118(2)    |
| C(90B)-C(95B)-C(94B) | 122.3(13) | C(90I)-C(95I)-C(94I) | 120(2)    |
| C(95H)-C(90H)-C(91H) | 122.1(18) | C(91E)-C(90E)-C(95E) | 120.1(12) |
| C(92H)-C(91H)-C(90H) | 114.8(18) | C(90E)-C(91E)-C(92E) | 121.3(13) |
| C(91H)-C(92H)-C(93H) | 122.1(19) | C(91E)-C(92E)-C(93E) | 119.3(11) |
| C(94H)-C(93H)-C(92H) | 122.7(19) | C(92E)-C(93E)-C(94E) | 121.0(10) |
| C(95H)-C(94H)-C(93H) | 114.2(18) | C(93E)-C(94E)-C(95E) | 117.9(11) |
| C(90H)-C(95H)-C(94H) | 122.9(19) | C(90E)-C(95E)-C(94E) | 120.3(12) |
| C(91C)-C(90C)-C(95C) | 117.6(18) | C(91F)-C(90F)-C(95F) | 119.8(17) |
| C(92C)-C(91C)-C(90C) | 121.7(19) | C(90F)-C(91F)-C(92F) | 120.5(18) |
| C(93C)-C(92C)-C(91C) | 121.4(19) | C(93F)-C(92F)-C(91F) | 120.8(18) |
| C(92C)-C(93C)-C(94C) | 118.2(18) | C(92F)-C(93F)-C(94F) | 119.1(16) |
| C(93C)-C(94C)-C(95C) | 121.2(17) | C(95F)-C(94F)-C(93F) | 119.4(16) |
| C(90C)-C(95C)-C(94C) | 119.9(17) | C(90F)-C(95F)-C(94F) | 120.2(16) |



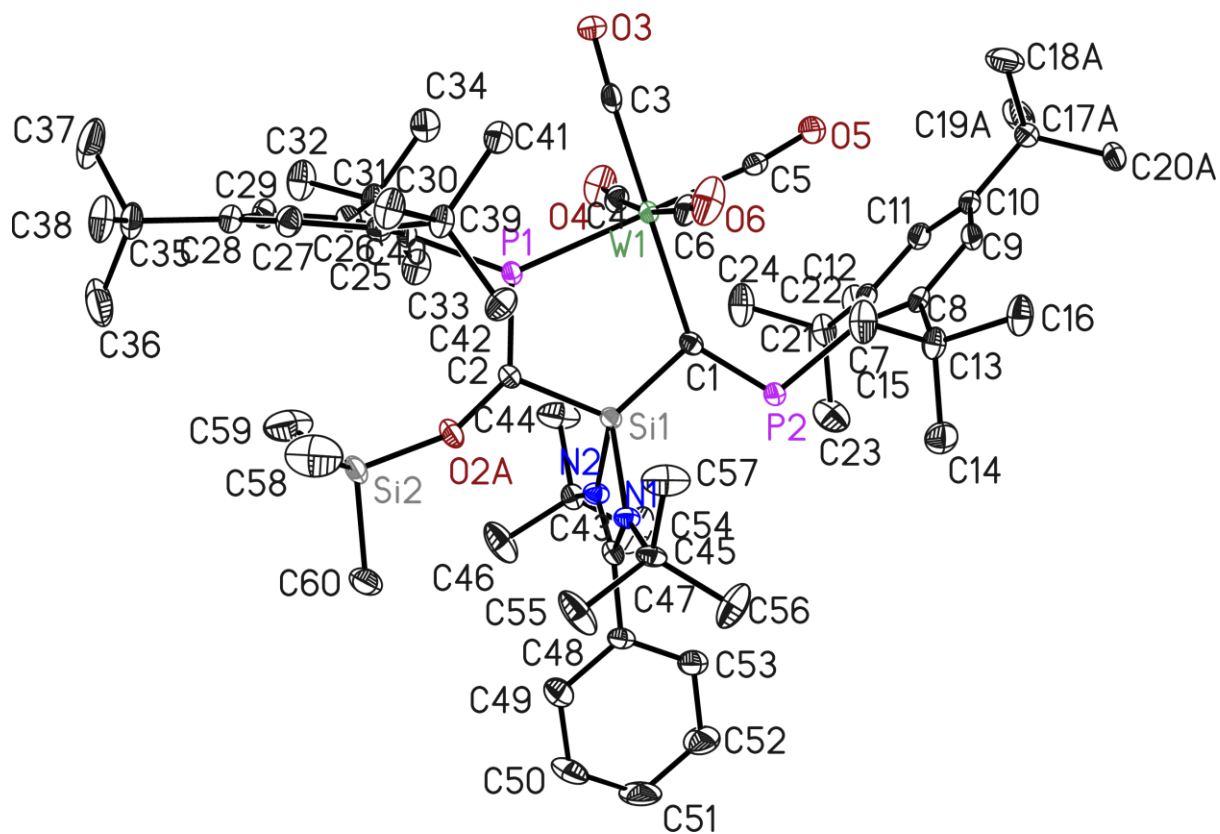

**Figure S43:** Molecular structure of **4** with thermal ellipsoids shown at 50% probability level. Hydrogen atoms are omitted for clarity.

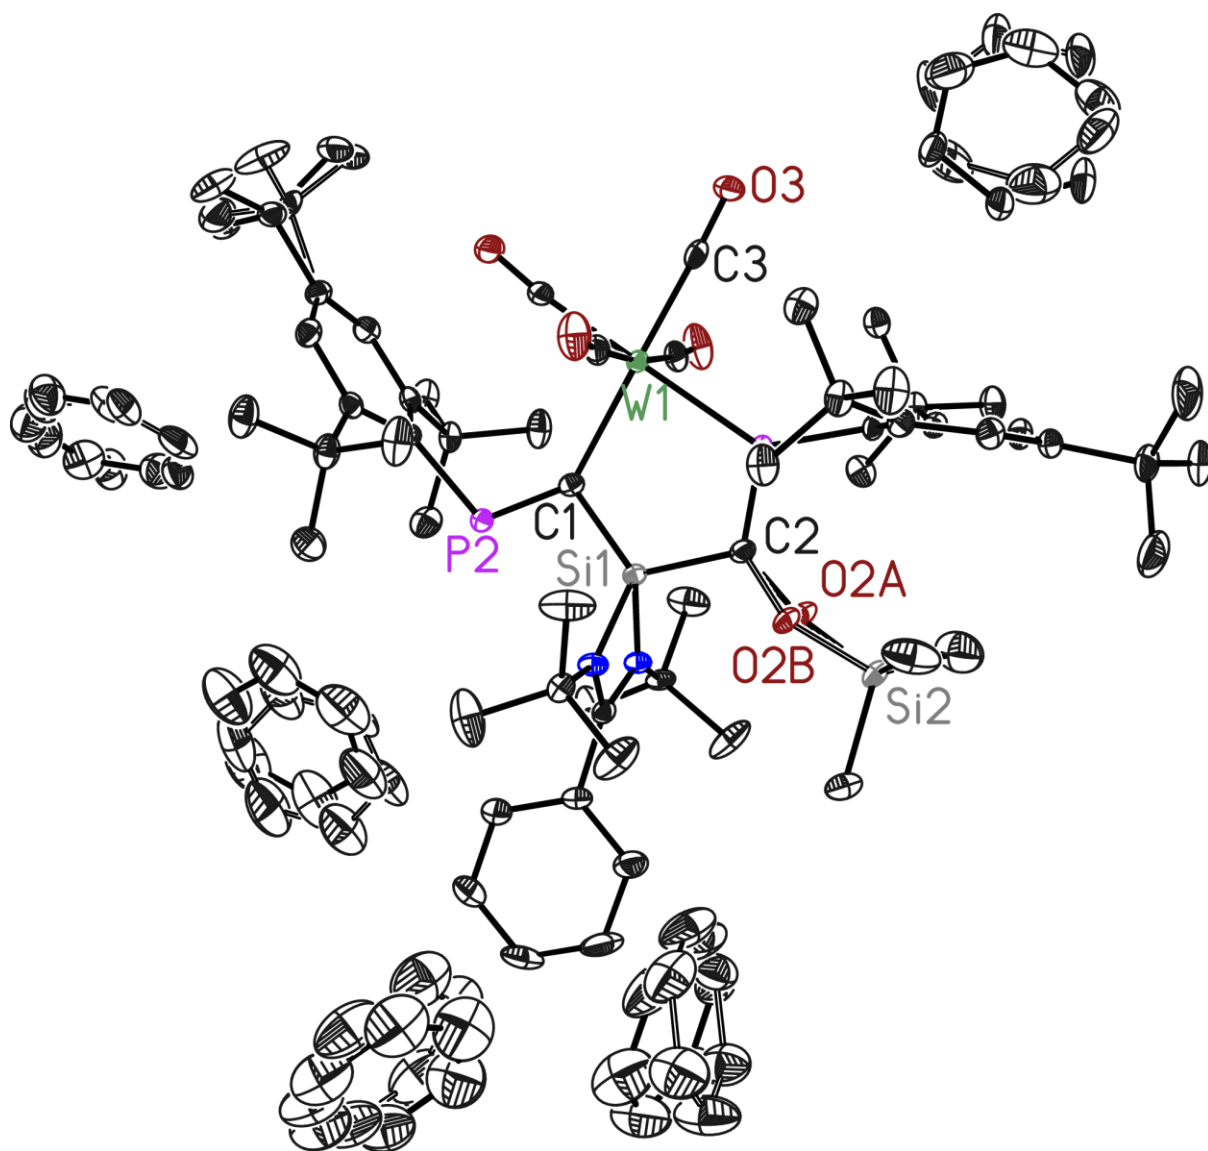

**Figure S44:** Asymmetric unit of **4** with thermal ellipsoids shown at 50% probability level. Hydrogen atoms are omitted for clarity. One *tert*-butyl group is disordered over two positions. The occupancy of the minor component refined to 0.271(12). The occupancy of the minor component of the disordered oxygen atom refined to 0.44(4). For the five disordered benzene molecules the occupancies of the minor position refined to 0.251(9), 0.339(8), 0.439(17), 0.47(3) and 0.376(13). All disordered groups were refined with distance restraints and restraints for the anisotropic parameters. Selected bond lengths (Å) and bond angles (°). W1–P1 2.4933(7), W1–C1 2.294(2), C1–P2 1.690(3), C2–P1 1.686(3), C1–Si1 1.821(2), C2–Si1 1.861(3), C2–O2A 1.389(9), O2A–Si2 1.657(8), P1–W1–C1 86.12(6), C1–Si1–C2 115.01(11), P1–C2–Si1 112.28(13), W1–C1–Si1 112.86(12), W1–P1–C2 113.65(9).

**Table S5.** Bond length [ $\text{\AA}$ ] and angles [ $^\circ$ ] for **4**.

|               |           |             |          |
|---------------|-----------|-------------|----------|
| W(1)-C(3)     | 1.968(3)  | C(27)-C(28) | 1.386(4) |
| W(1)-C(5)     | 1.995(3)  | C(28)-C(29) | 1.380(4) |
| W(1)-C(4)     | 2.029(3)  | C(28)-C(35) | 1.535(4) |
| W(1)-C(6)     | 2.039(3)  | C(29)-C(30) | 1.401(4) |
| W(1)-C(1)     | 2.294(2)  | C(30)-C(39) | 1.554(4) |
| W(1)-P(1)     | 2.4933(7) | C(31)-C(34) | 1.536(4) |
| P(2)-C(1)     | 1.690(3)  | C(31)-C(33) | 1.537(4) |
| P(2)-C(7)     | 1.881(2)  | C(31)-C(32) | 1.545(4) |
| C(7)-C(12)    | 1.428(4)  | C(35)-C(36) | 1.525(5) |
| C(7)-C(8)     | 1.430(4)  | C(35)-C(38) | 1.527(5) |
| C(8)-C(9)     | 1.402(4)  | C(35)-C(37) | 1.530(5) |
| C(8)-C(13)    | 1.546(4)  | C(39)-C(42) | 1.537(4) |
| C(9)-C(10)    | 1.388(4)  | C(39)-C(41) | 1.540(4) |
| C(10)-C(11)   | 1.380(4)  | C(39)-C(40) | 1.544(4) |
| C(10)-C(17A)  | 1.544(7)  | Si(1)-N(1)  | 1.820(2) |
| C(10)-C(17B)  | 1.568(16) | Si(1)-N(2)  | 1.821(2) |
| C(11)-C(12)   | 1.398(4)  | Si(1)-C(1)  | 1.821(2) |
| C(12)-C(21)   | 1.549(4)  | Si(1)-C(2)  | 1.861(3) |
| C(13)-C(14)   | 1.535(4)  | Si(1)-C(47) | 2.278(2) |
| C(13)-C(15)   | 1.539(4)  | N(2)-C(47)  | 1.343(3) |
| C(13)-C(16)   | 1.542(4)  | N(2)-C(43)  | 1.488(3) |
| C(17A)-C(19A) | 1.526(8)  | C(43)-C(46) | 1.509(4) |
| C(17A)-C(18A) | 1.535(8)  | C(43)-C(44) | 1.511(4) |
| C(17A)-C(20A) | 1.536(7)  | C(43)-C(45) | 1.522(5) |
| C(17B)-C(19B) | 1.513(17) | C(47)-N(1)  | 1.343(3) |
| C(17B)-C(20B) | 1.525(17) | C(47)-C(48) | 1.479(3) |
| C(17B)-C(18B) | 1.543(16) | C(48)-C(53) | 1.385(4) |
| C(21)-C(23)   | 1.534(5)  | C(48)-C(49) | 1.387(4) |
| C(21)-C(24)   | 1.535(4)  | C(49)-C(50) | 1.391(4) |
| C(21)-C(22)   | 1.538(4)  | C(50)-C(51) | 1.361(5) |
| P(1)-C(2)     | 1.686(3)  | C(51)-C(52) | 1.386(5) |
| P(1)-C(25)    | 1.852(3)  | C(52)-C(53) | 1.390(4) |
| C(25)-C(30)   | 1.426(4)  | N(1)-C(54)  | 1.485(3) |
| C(25)-C(26)   | 1.434(4)  | C(54)-C(56) | 1.514(4) |
| C(26)-C(27)   | 1.399(4)  | C(54)-C(57) | 1.522(4) |
| C(26)-C(31)   | 1.557(4)  | C(54)-C(55) | 1.540(4) |

|               |           |                |           |
|---------------|-----------|----------------|-----------|
| C(2)-O(2B)    | 1.375(6)  | C(92C)-C(93C)  | 1.353(15) |
| C(2)-O(2A)    | 1.389(9)  | C(93C)-C(94C)  | 1.380(13) |
| O(2A)-Si(2)   | 1.657(8)  | C(94C)-C(95C)  | 1.409(14) |
| O(2B)-Si(2)   | 1.644(6)  | C(90G)-C(91G)  | 1.372(12) |
| Si(2)-C(58)   | 1.835(4)  | C(90G)-C(95G)  | 1.395(12) |
| Si(2)-C(59)   | 1.844(4)  | C(91G)-C(92G)  | 1.359(13) |
| Si(2)-C(60)   | 1.856(3)  | C(92G)-C(93G)  | 1.371(12) |
| O(3)-C(3)     | 1.172(3)  | C(93G)-C(94G)  | 1.390(13) |
| O(4)-C(4)     | 1.151(3)  | C(94G)-C(95G)  | 1.373(14) |
| O(5)-C(5)     | 1.144(3)  | C(90D)-C(95D)  | 1.383(13) |
| O(6)-C(6)     | 1.151(3)  | C(90D)-C(91D)  | 1.396(12) |
| C(90A)-C(91A) | 1.353(9)  | C(91D)-C(92D)  | 1.370(11) |
| C(90A)-C(95A) | 1.361(9)  | C(92D)-C(93D)  | 1.378(11) |
| C(91A)-C(92A) | 1.378(10) | C(93D)-C(94D)  | 1.379(12) |
| C(92A)-C(93A) | 1.401(11) | C(94D)-C(95D)  | 1.384(13) |
| C(93A)-C(94A) | 1.369(9)  | C(90I)-C(95I)  | 1.384(14) |
| C(94A)-C(95A) | 1.371(8)  | C(90I)-C(91I)  | 1.396(12) |
| C(90J)-C(91J) | 1.364(16) | C(91I)-C(92I)  | 1.367(13) |
| C(90J)-C(95J) | 1.399(17) | C(92I)-C(93I)  | 1.393(13) |
| C(91J)-C(92J) | 1.331(17) | C(93I)-C(94I)  | 1.372(14) |
| C(92J)-C(93J) | 1.356(17) | C(94I)-C(95I)  | 1.374(15) |
| C(93J)-C(94J) | 1.367(15) | C(90E)-C(91E)  | 1.367(12) |
| C(94J)-C(95J) | 1.374(15) | C(90E)-C(95E)  | 1.373(12) |
| C(90B)-C(95B) | 1.358(15) | C(91E)-C(92E)  | 1.384(11) |
| C(90B)-C(91B) | 1.388(15) | C(92E)-C(93E)  | 1.380(8)  |
| C(91B)-C(92B) | 1.366(16) | C(93E)-C(94E)  | 1.384(8)  |
| C(92B)-C(93B) | 1.358(16) | C(94E)-C(95E)  | 1.400(9)  |
| C(93B)-C(94B) | 1.385(16) | C(90F)-C(91F)  | 1.372(14) |
| C(94B)-C(95B) | 1.356(16) | C(90F)-C(95F)  | 1.378(11) |
| C(90H)-C(91H) | 1.359(11) | C(91F)-C(92F)  | 1.365(16) |
| C(90H)-C(95H) | 1.378(11) | C(92F)-C(93F)  | 1.392(15) |
| C(91H)-C(92H) | 1.409(12) | C(93F)-C(94F)  | 1.382(15) |
| C(92H)-C(93H) | 1.394(11) | C(94F)-C(95F)  | 1.379(13) |
| C(93H)-C(94H) | 1.377(10) |                |           |
| C(94H)-C(95H) | 1.353(11) | C(3)-W(1)-C(5) | 86.02(10) |
| C(90C)-C(95C) | 1.382(15) | C(3)-W(1)-C(4) | 87.38(12) |
| C(90C)-C(91C) | 1.384(15) | C(5)-W(1)-C(4) | 87.72(13) |
| C(91C)-C(92C) | 1.366(15) | C(3)-W(1)-C(6) | 86.10(12) |

|                      |            |                      |            |
|----------------------|------------|----------------------|------------|
| C(5)-W(1)-C(6)       | 88.45(14)  | C(18A)-C(17A)-C(10)  | 106.4(5)   |
| C(4)-W(1)-C(6)       | 172.65(10) | C(20A)-C(17A)-C(10)  | 110.8(5)   |
| C(3)-W(1)-C(1)       | 178.69(12) | C(19B)-C(17B)-C(20B) | 108.7(15)  |
| C(5)-W(1)-C(1)       | 94.23(9)   | C(19B)-C(17B)-C(18B) | 109.1(14)  |
| C(4)-W(1)-C(1)       | 93.91(11)  | C(20B)-C(17B)-C(18B) | 107.2(17)  |
| C(6)-W(1)-C(1)       | 92.62(11)  | C(19B)-C(17B)-C(10)  | 111.2(12)  |
| C(3)-W(1)-P(1)       | 93.65(7)   | C(20B)-C(17B)-C(10)  | 106.8(14)  |
| C(5)-W(1)-P(1)       | 179.38(10) | C(18B)-C(17B)-C(10)  | 113.7(13)  |
| C(4)-W(1)-P(1)       | 91.74(8)   | C(23)-C(21)-C(24)    | 111.9(3)   |
| C(6)-W(1)-P(1)       | 92.06(9)   | C(23)-C(21)-C(22)    | 105.0(3)   |
| C(1)-W(1)-P(1)       | 86.12(6)   | C(24)-C(21)-C(22)    | 106.3(3)   |
| C(1)-P(2)-C(7)       | 111.17(11) | C(23)-C(21)-C(12)    | 110.5(3)   |
| C(12)-C(7)-C(8)      | 118.1(2)   | C(24)-C(21)-C(12)    | 110.5(3)   |
| C(12)-C(7)-P(2)      | 120.6(2)   | C(22)-C(21)-C(12)    | 112.6(3)   |
| C(8)-C(7)-P(2)       | 121.3(2)   | C(2)-P(1)-C(25)      | 109.58(12) |
| C(9)-C(8)-C(7)       | 118.3(3)   | C(2)-P(1)-W(1)       | 113.65(9)  |
| C(9)-C(8)-C(13)      | 117.6(3)   | C(25)-P(1)-W(1)      | 136.77(8)  |
| C(7)-C(8)-C(13)      | 124.0(3)   | C(30)-C(25)-C(26)    | 119.0(2)   |
| C(10)-C(9)-C(8)      | 123.4(3)   | C(30)-C(25)-P(1)     | 120.2(2)   |
| C(11)-C(10)-C(9)     | 116.7(2)   | C(26)-C(25)-P(1)     | 120.5(2)   |
| C(11)-C(10)-C(17A)   | 121.5(4)   | C(27)-C(26)-C(25)    | 117.8(3)   |
| C(9)-C(10)-C(17A)    | 121.5(4)   | C(27)-C(26)-C(31)    | 117.6(3)   |
| C(11)-C(10)-C(17B)   | 126.0(7)   | C(25)-C(26)-C(31)    | 124.3(3)   |
| C(9)-C(10)-C(17B)    | 116.8(7)   | C(28)-C(27)-C(26)    | 123.3(3)   |
| C(10)-C(11)-C(12)    | 123.5(3)   | C(29)-C(28)-C(27)    | 117.1(2)   |
| C(11)-C(12)-C(7)     | 118.6(3)   | C(29)-C(28)-C(35)    | 122.6(3)   |
| C(11)-C(12)-C(21)    | 117.2(3)   | C(27)-C(28)-C(35)    | 120.3(3)   |
| C(7)-C(12)-C(21)     | 124.2(3)   | C(28)-C(29)-C(30)    | 123.4(3)   |
| C(14)-C(13)-C(15)    | 111.2(3)   | C(29)-C(30)-C(25)    | 117.9(3)   |
| C(14)-C(13)-C(16)    | 105.7(3)   | C(29)-C(30)-C(39)    | 117.0(3)   |
| C(15)-C(13)-C(16)    | 106.2(2)   | C(25)-C(30)-C(39)    | 124.9(3)   |
| C(14)-C(13)-C(8)     | 110.3(2)   | C(34)-C(31)-C(33)    | 109.8(3)   |
| C(15)-C(13)-C(8)     | 111.4(2)   | C(34)-C(31)-C(32)    | 106.2(3)   |
| C(16)-C(13)-C(8)     | 111.9(2)   | C(33)-C(31)-C(32)    | 106.1(3)   |
| C(19A)-C(17A)-C(18A) | 108.1(5)   | C(34)-C(31)-C(26)    | 108.1(2)   |
| C(19A)-C(17A)-C(20A) | 109.3(5)   | C(33)-C(31)-C(26)    | 114.3(3)   |
| C(18A)-C(17A)-C(20A) | 108.9(6)   | C(32)-C(31)-C(26)    | 112.0(3)   |
| C(19A)-C(17A)-C(10)  | 113.2(5)   | C(36)-C(35)-C(38)    | 108.4(3)   |

|                   |            |                   |            |
|-------------------|------------|-------------------|------------|
| C(36)-C(35)-C(37) | 109.9(3)   | C(49)-C(48)-C(47) | 121.6(3)   |
| C(38)-C(35)-C(37) | 107.9(3)   | C(48)-C(49)-C(50) | 119.1(3)   |
| C(36)-C(35)-C(28) | 108.5(3)   | C(51)-C(50)-C(49) | 121.0(3)   |
| C(38)-C(35)-C(28) | 112.1(2)   | C(50)-C(51)-C(52) | 120.1(3)   |
| C(37)-C(35)-C(28) | 110.1(3)   | C(51)-C(52)-C(53) | 119.9(3)   |
| C(42)-C(39)-C(41) | 110.9(2)   | C(48)-C(53)-C(52) | 119.6(3)   |
| C(42)-C(39)-C(40) | 105.9(2)   | C(47)-N(1)-C(54)  | 130.2(2)   |
| C(41)-C(39)-C(40) | 106.2(2)   | C(47)-N(1)-Si(1)  | 90.85(15)  |
| C(42)-C(39)-C(30) | 113.4(2)   | C(54)-N(1)-Si(1)  | 138.84(17) |
| C(41)-C(39)-C(30) | 108.0(2)   | N(1)-C(54)-C(56)  | 111.4(3)   |
| C(40)-C(39)-C(30) | 112.2(2)   | N(1)-C(54)-C(57)  | 105.6(2)   |
| N(1)-Si(1)-N(2)   | 72.22(9)   | C(56)-C(54)-C(57) | 109.2(3)   |
| N(1)-Si(1)-C(1)   | 122.09(12) | N(1)-C(54)-C(55)  | 109.9(2)   |
| N(2)-Si(1)-C(1)   | 121.65(12) | C(56)-C(54)-C(55) | 111.7(3)   |
| N(1)-Si(1)-C(2)   | 109.20(12) | C(57)-C(54)-C(55) | 108.8(3)   |
| N(2)-Si(1)-C(2)   | 109.45(13) | O(2B)-C(2)-P(1)   | 132.8(5)   |
| C(1)-Si(1)-C(2)   | 115.01(11) | O(2A)-C(2)-P(1)   | 128.8(8)   |
| N(1)-Si(1)-C(47)  | 36.12(9)   | O(2B)-C(2)-Si(1)  | 113.8(4)   |
| N(2)-Si(1)-C(47)  | 36.12(9)   | O(2A)-C(2)-Si(1)  | 116.1(6)   |
| C(1)-Si(1)-C(47)  | 130.08(11) | P(1)-C(2)-Si(1)   | 112.28(13) |
| C(2)-Si(1)-C(47)  | 114.91(10) | C(2)-O(2A)-Si(2)  | 147.4(13)  |
| C(47)-N(2)-C(43)  | 130.4(2)   | C(2)-O(2B)-Si(2)  | 151.1(8)   |
| C(47)-N(2)-Si(1)  | 90.83(15)  | O(2B)-Si(2)-C(58) | 118.7(6)   |
| C(43)-N(2)-Si(1)  | 138.71(17) | O(2A)-Si(2)-C(58) | 99.2(10)   |
| N(2)-C(43)-C(46)  | 111.2(2)   | O(2B)-Si(2)-C(59) | 104.0(8)   |
| N(2)-C(43)-C(44)  | 105.9(2)   | O(2A)-Si(2)-C(59) | 121.0(6)   |
| C(46)-C(43)-C(44) | 109.2(3)   | C(58)-Si(2)-C(59) | 112.0(2)   |
| N(2)-C(43)-C(45)  | 110.9(3)   | O(2B)-Si(2)-C(60) | 104.6(3)   |
| C(46)-C(43)-C(45) | 109.6(3)   | O(2A)-Si(2)-C(60) | 107.0(5)   |
| C(44)-C(43)-C(45) | 110.0(3)   | C(58)-Si(2)-C(60) | 108.52(19) |
| N(2)-C(47)-N(1)   | 106.1(2)   | C(59)-Si(2)-C(60) | 108.29(17) |
| N(2)-C(47)-C(48)  | 126.5(2)   | O(3)-C(3)-W(1)    | 177.5(2)   |
| N(1)-C(47)-C(48)  | 127.3(2)   | O(4)-C(4)-W(1)    | 174.6(3)   |
| N(2)-C(47)-Si(1)  | 53.05(12)  | O(5)-C(5)-W(1)    | 173.8(2)   |
| N(1)-C(47)-Si(1)  | 53.03(12)  | O(6)-C(6)-W(1)    | 173.9(2)   |
| C(48)-C(47)-Si(1) | 175.21(19) | P(2)-C(1)-Si(1)   | 107.05(13) |
| C(53)-C(48)-C(49) | 120.3(2)   | P(2)-C(1)-W(1)    | 140.09(13) |
| C(53)-C(48)-C(47) | 118.1(2)   | Si(1)-C(1)-W(1)   | 112.86(12) |

|                      |           |                      |           |
|----------------------|-----------|----------------------|-----------|
| C(91A)-C(90A)-C(95A) | 121.2(8)  | C(91G)-C(90G)-C(95G) | 118.7(11) |
| C(90A)-C(91A)-C(92A) | 119.2(8)  | C(92G)-C(91G)-C(90G) | 120.3(10) |
| C(91A)-C(92A)-C(93A) | 120.0(7)  | C(91G)-C(92G)-C(93G) | 121.3(11) |
| C(94A)-C(93A)-C(92A) | 119.5(7)  | C(92G)-C(93G)-C(94G) | 119.8(11) |
| C(93A)-C(94A)-C(95A) | 119.3(6)  | C(95G)-C(94G)-C(93G) | 118.7(10) |
| C(90A)-C(95A)-C(94A) | 120.8(7)  | C(94G)-C(95G)-C(90G) | 121.2(10) |
| C(91J)-C(90J)-C(95J) | 119.4(18) | C(95D)-C(90D)-C(91D) | 121.4(12) |
| C(92J)-C(91J)-C(90J) | 122.6(19) | C(92D)-C(91D)-C(90D) | 118.4(11) |
| C(91J)-C(92J)-C(93J) | 119.2(19) | C(91D)-C(92D)-C(93D) | 120.8(11) |
| C(92J)-C(93J)-C(94J) | 120.1(16) | C(92D)-C(93D)-C(94D) | 120.5(12) |
| C(93J)-C(94J)-C(95J) | 121.6(15) | C(93D)-C(94D)-C(95D) | 119.8(14) |
| C(94J)-C(95J)-C(90J) | 117.0(15) | C(90D)-C(95D)-C(94D) | 119.0(14) |
| C(95B)-C(90B)-C(91B) | 123.5(16) | C(95I)-C(90I)-C(91I) | 120.3(15) |
| C(92B)-C(91B)-C(90B) | 114.7(15) | C(92I)-C(91I)-C(90I) | 119.2(13) |
| C(93B)-C(92B)-C(91B) | 119.5(17) | C(91I)-C(92I)-C(93I) | 120.3(13) |
| C(92B)-C(93B)-C(94B) | 127.5(17) | C(94I)-C(93I)-C(92I) | 120.1(14) |
| C(95B)-C(94B)-C(93B) | 111.3(16) | C(93I)-C(94I)-C(95I) | 120.2(16) |
| C(94B)-C(95B)-C(90B) | 123.6(16) | C(94I)-C(95I)-C(90I) | 119.7(16) |
| C(91H)-C(90H)-C(95H) | 119.3(9)  | C(91E)-C(90E)-C(95E) | 121.1(8)  |
| C(90H)-C(91H)-C(92H) | 119.3(9)  | C(90E)-C(91E)-C(92E) | 120.4(9)  |
| C(93H)-C(92H)-C(91H) | 120.3(9)  | C(93E)-C(92E)-C(91E) | 119.1(9)  |
| C(94H)-C(93H)-C(92H) | 118.8(9)  | C(92E)-C(93E)-C(94E) | 121.0(7)  |
| C(95H)-C(94H)-C(93H) | 119.8(9)  | C(93E)-C(94E)-C(95E) | 119.1(7)  |
| C(94H)-C(95H)-C(90H) | 122.4(9)  | C(90E)-C(95E)-C(94E) | 119.4(7)  |
| C(95C)-C(90C)-C(91C) | 118.7(14) | C(91F)-C(90F)-C(95F) | 120.8(13) |
| C(92C)-C(91C)-C(90C) | 120.8(15) | C(92F)-C(91F)-C(90F) | 121.1(15) |
| C(93C)-C(92C)-C(91C) | 121.7(15) | C(91F)-C(92F)-C(93F) | 119.1(16) |
| C(92C)-C(93C)-C(94C) | 118.8(14) | C(94F)-C(93F)-C(92F) | 119.3(13) |
| C(93C)-C(94C)-C(95C) | 120.5(13) | C(95F)-C(94F)-C(93F) | 121.4(12) |
| C(90C)-C(95C)-C(94C) | 119.3(13) | C(90F)-C(95F)-C(94F) | 118.2(12) |

## Computational Details

To understand the detailed atomic-level mechanisms for the formation of products **2'**, **3'**, and **4'** from the reaction of **1'** with Fe(CO)<sub>5</sub>, Mo(CO)<sub>6</sub>, and W(CO)<sub>6</sub>, respectively, free energy profiles were mapped at the B3LYP-D3/6-31G\* Mo, W (LanL2DZ) level of theory.<sup>12-18</sup> The B3LYP-D3 method has been shown in the literature to provide reliable results for understanding the mechanisms of similar systems.<sup>19</sup> To include the effect of the solvent, all the calculations were performed using the solvent toluene within the polarizable continuum model (PCM).<sup>20</sup> The thermodynamic properties for the reaction of **1'** with Fe(CO)<sub>5</sub> were calculated at the room (experimental) temperature of 273.15 K. For the reaction of **1'** with Mo(CO)<sub>6</sub> and W(CO)<sub>6</sub>, all the thermodynamic properties were calculated at 333.15 K (experimental temperature). All the DFT calculations were performed using the Gaussian 16 software package.<sup>21</sup>

The free energy profile for the reaction of **1'** with Fe(CO)<sub>5</sub> is shown in (Figure S45). As can be seen from (Figure S45 (b)), the HOMO (-4.11 eV) molecular orbital of **1** corresponds to a Si=P  $\pi$ -type orbital, while the LUMO (-0.83 eV) is a  $\pi^*$ -type orbital of the phenyl ring of the benzamidinate ligand. NBO analysis of **1** reveals that the HOMO orbital has a predominant electron density at the phosphorus atom, which is available for bond formation with incoming Fe(CO)<sub>5</sub>. Initially, **1'** and Fe(CO)<sub>5</sub> combine to form the phosphasilene-iron complex, **Fe-int1**, releasing one CO molecule.

The CO molecule released from the previous step can be inserted into the P-Si bond of **Fe-int1** through the transition state **Fe-ts1'**, producing **Fe-int2'**. However, this process requires a high energy barrier of 66.88 kcal/mol, and hence is unfeasible under the experimental condition. An alternative scenario, in which **Fe-int1** reacts with a second **1'** molecule to generate **Fe-int2** while releasing another CO molecule, has been studied. It is worth noting that the *in situ* monitoring of the reaction by <sup>31</sup>P NMR spectroscopy showed the formation of Fe complex **2** together with a new peak at  $\delta$  200 ppm, which can be attributed to **Fe-int2** (Figure S38). The large downfield shift in the <sup>31</sup>P NMR resonance signal compared to phosphasilene **1** might be due to the coordination of P lone pair to the Fe(CO)<sub>3</sub> moiety which results in reduced electron density on the phosphorus atom. A similar trend is observed in the <sup>31</sup>P NMR spectrum for the M(0) complexes of phosphasilenes, further suggesting **Fe-int2** formation.

The two CO molecules released from the previous steps can then interact with the two Si atoms, Si(3) and Si(7) of **Fe-int2**, to form **Fe-int3**. One of the CO molecules forms a bond with Si(7) by overlapping the empty valence orbital of the silylium moiety with a  $\pi^*$  orbital of the CO group, while the other CO molecule has a weak interaction with Si(3) at a distance of 3.5 Å due to steric crowding. During the Si(7)-C(3) bond formation, one of the C-N bonds of the amidinate group is stretched from 1.85 Å in **Fe-int2** to 2.03 Å in **Fe-int3**. The Si(7)-C(8) and Si(3)-C(2) distances for **Fe-int3** are 2.05 Å and 3.48 Å, respectively. The complex **Fe-int3** acts as the activated species from which the deoxygenative homo-coupling of two CO molecules happens as seen in the experiments. The energetics of the reaction are thus monitored with respect to **Fe-int3**. The activated species **Fe-int3** undergoes a cyclization step where the



overlap between the  $sp^2$  hybridized orbitals of C(2) and C(8) results in the C-C bond formation (Figure 5(c)) *via* the transition state **Fe-ts1**, forming a 7-membered ring structure **Fe-int4**. The energy barrier for this cyclization was determined to be 10.44 kcal/mol, and **Fe-int4** was stabilized by 10.13 kcal/mol relative to **Fe-int3**. In the subsequent step, the rearrangement of the CO group associated with the C(2) atom leads to the formation of a ketene moiety, **Fe-int5** (-19.83 kcal/mol), *via* the transition state **Fe-ts2**, with an energy barrier of 12.71 kcal/mol. This rearrangement is facilitated by the formation of a Si(3)-O(9) bond involving the oxygen atom attached to C(8), accompanied by the breaking of the Si(3)-C(2) bond. In the following step, the ketene moiety facilitates the formation of a strained four-membered ring through the formation of the P(6)-C(2) bond *via* **Fe-ts3** with an energy of -10.07 kcal/mol, leading to the intermediate **Fe-int6**. In the next step, this strain is relieved by breaking the P(6)-C(2), P(6)-Si(7), and C(8)-O(9) bonds, along with the simultaneous formation of the C(8)-P(6) bond to form **Fe-int7** *via* **Fe-ts4**. This process involves the insertion of the ketene group (C(8)=C(2)=O(1)) into the P(6)-Si(7) bond and the opening of the seven-membered ring. The energies of **Fe-ts4** and **Fe-int7** are 18.04 and -29.05 kcal/mol, respectively. In the subsequent step, the formation of Fe(5)-C(2) and Si(7)-O(1) bond happens *via* a bicyclic transition state **Fe-ts5**, having an energy of -9.53 kcal/mol and results in the four-membered cyclic structure **Fe-int8**. NBO calculations reveal that the interaction between P(4)-Fe(5)  $\pi^*$  and C(2)-O(1)  $\pi^*$  orbitals and between C(8)-Si(7)  $\sigma$  and C(2)-O(1)  $\pi^*$  orbitals favour this rearrangement. Finally, from **Fe-int8**, the elimination of silanone (**S**) which can undergoes the polymerization, occurs *via* the breaking of the P(4)-Si(3) bond, resulting in the final product **2'** through the ring closure transition state **Fe-ts6**, with an energy of -9.76 kcal/mol. Product **2'** is stabilized by 47.9 kcal/mol compared to activated species **Fe-int3**. Using the energy-span model,<sup>46</sup> the free energy profile indicates that the reaction from **int3** involves an overall barrier of  $\delta E = 18.04$  kcal/mol associated with **Fe-ts4** and is the rate determining transition state for the deoxygenative homo-coupling of two CO molecules.

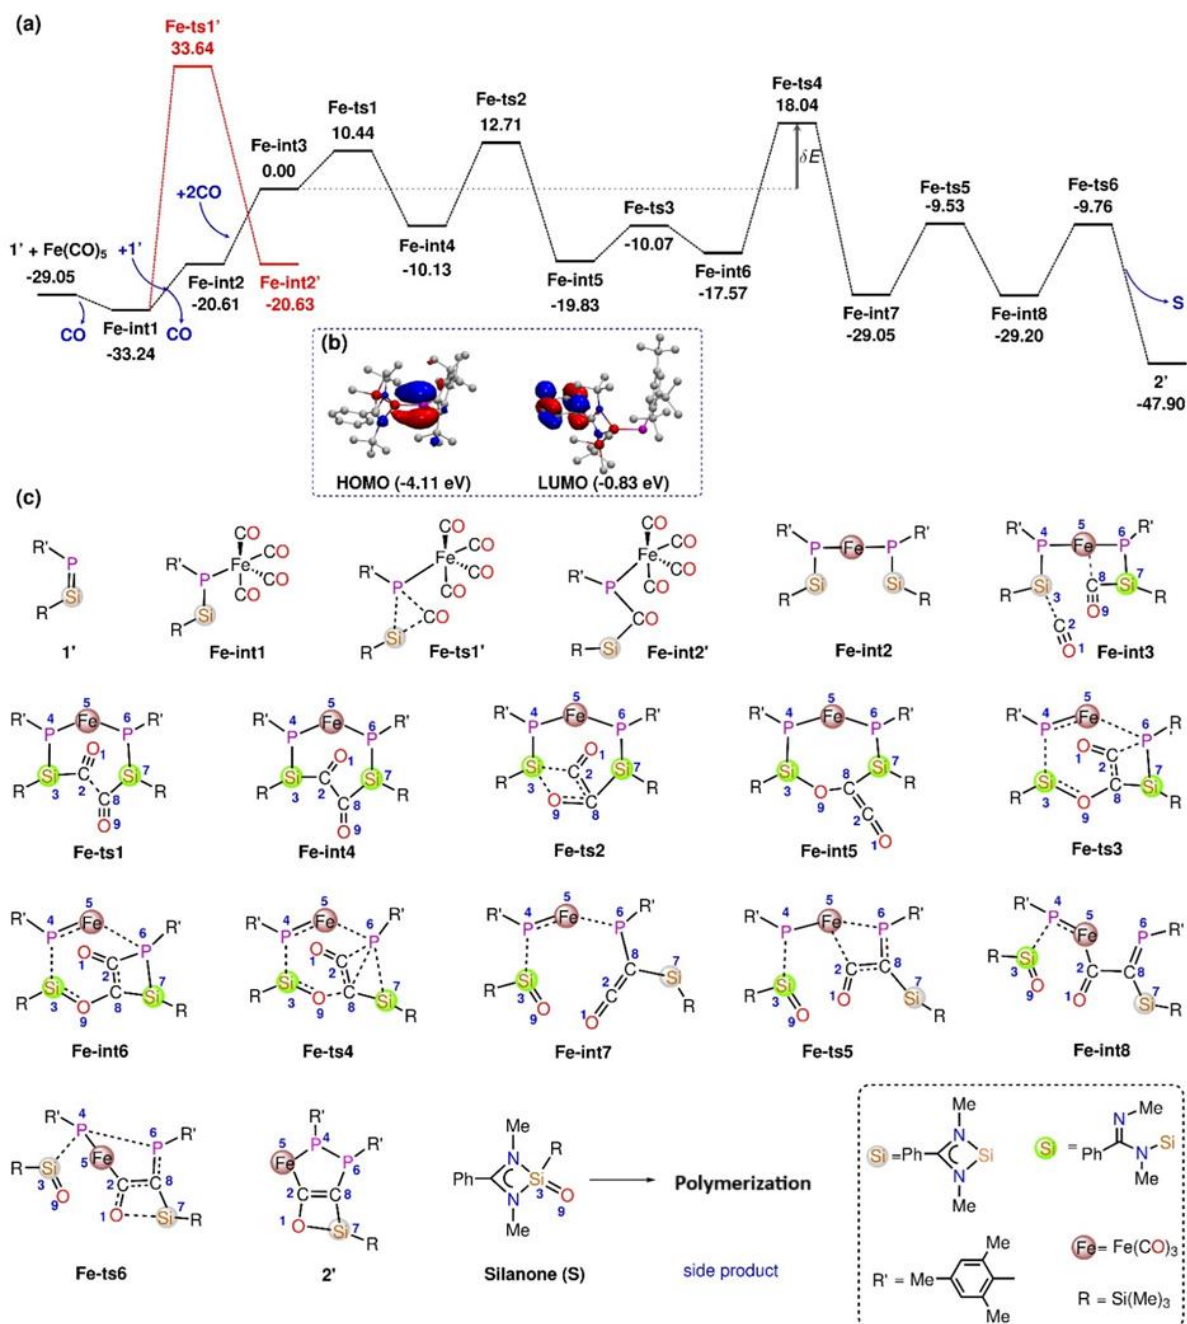

**Figure. 45.** (a) The Gibbs free energy profile for the reaction of 1' with Fe(CO)<sub>5</sub> was obtained at the B3LYP-D3/6-31G\* level of theory. (b) Plot of the HOMO and LUMO orbitals and their corresponding energies of 1. (c) Different stationary point structures existing along the reaction pathway. The substituents connected to Si, Fe, and P are omitted in the images for clarity. The energies are given in kcal/mol

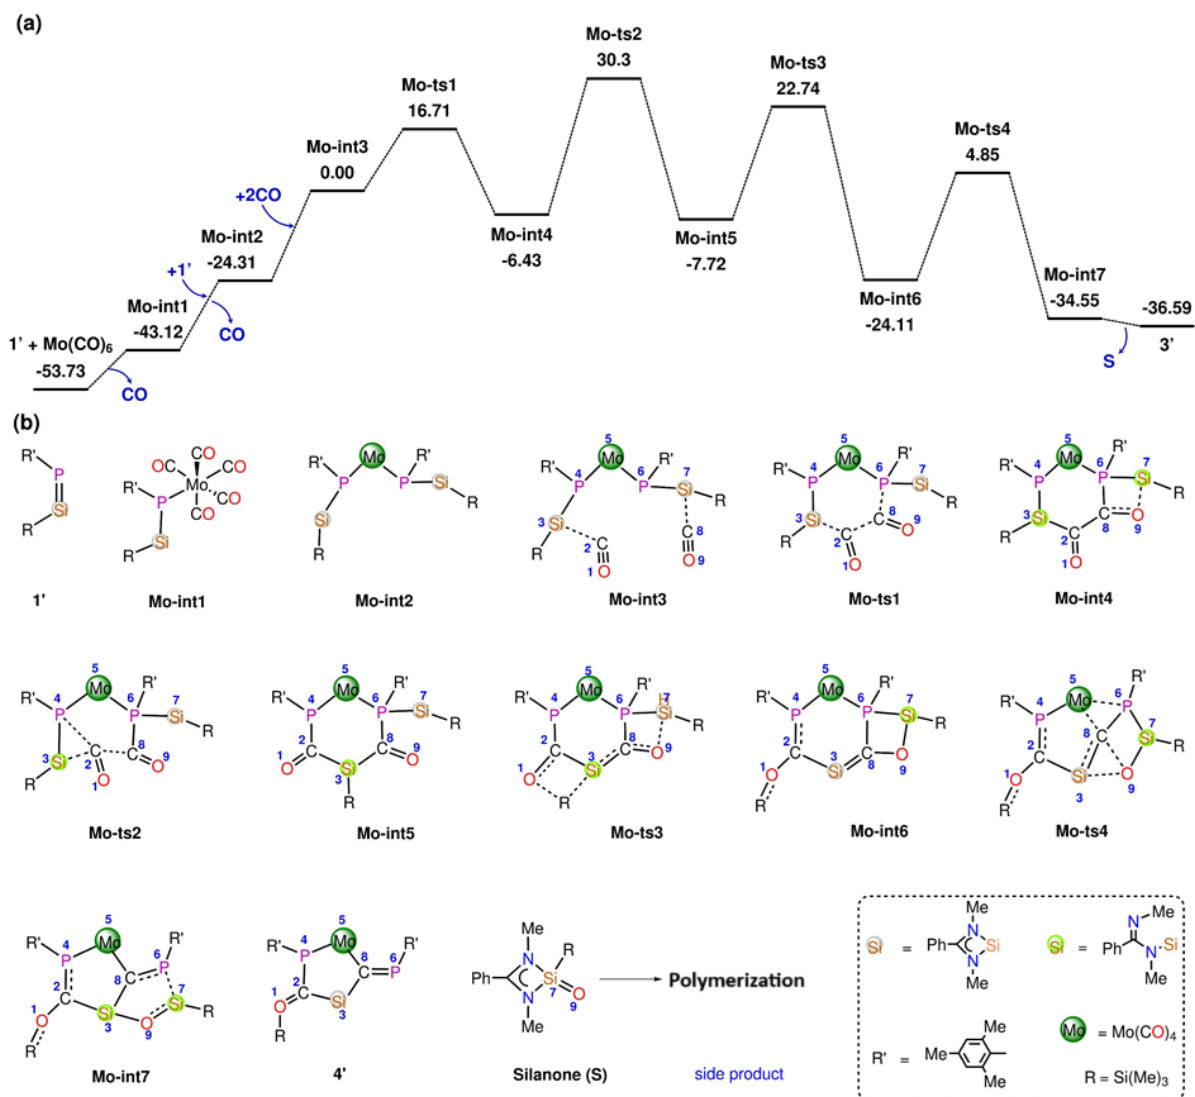

**Figure S46.** (a) The Gibbs free energy profile for the reaction of 1' with  $\text{Mo}(\text{CO})_6$  obtained at the B3LYP-D3/6-31G\* level of theory. (b) Different stationary point structures existing along the reaction pathway. The substituents connected to Si, Mo, and P, are omitted in the images for clarity. The energies are given in kcal/mol.

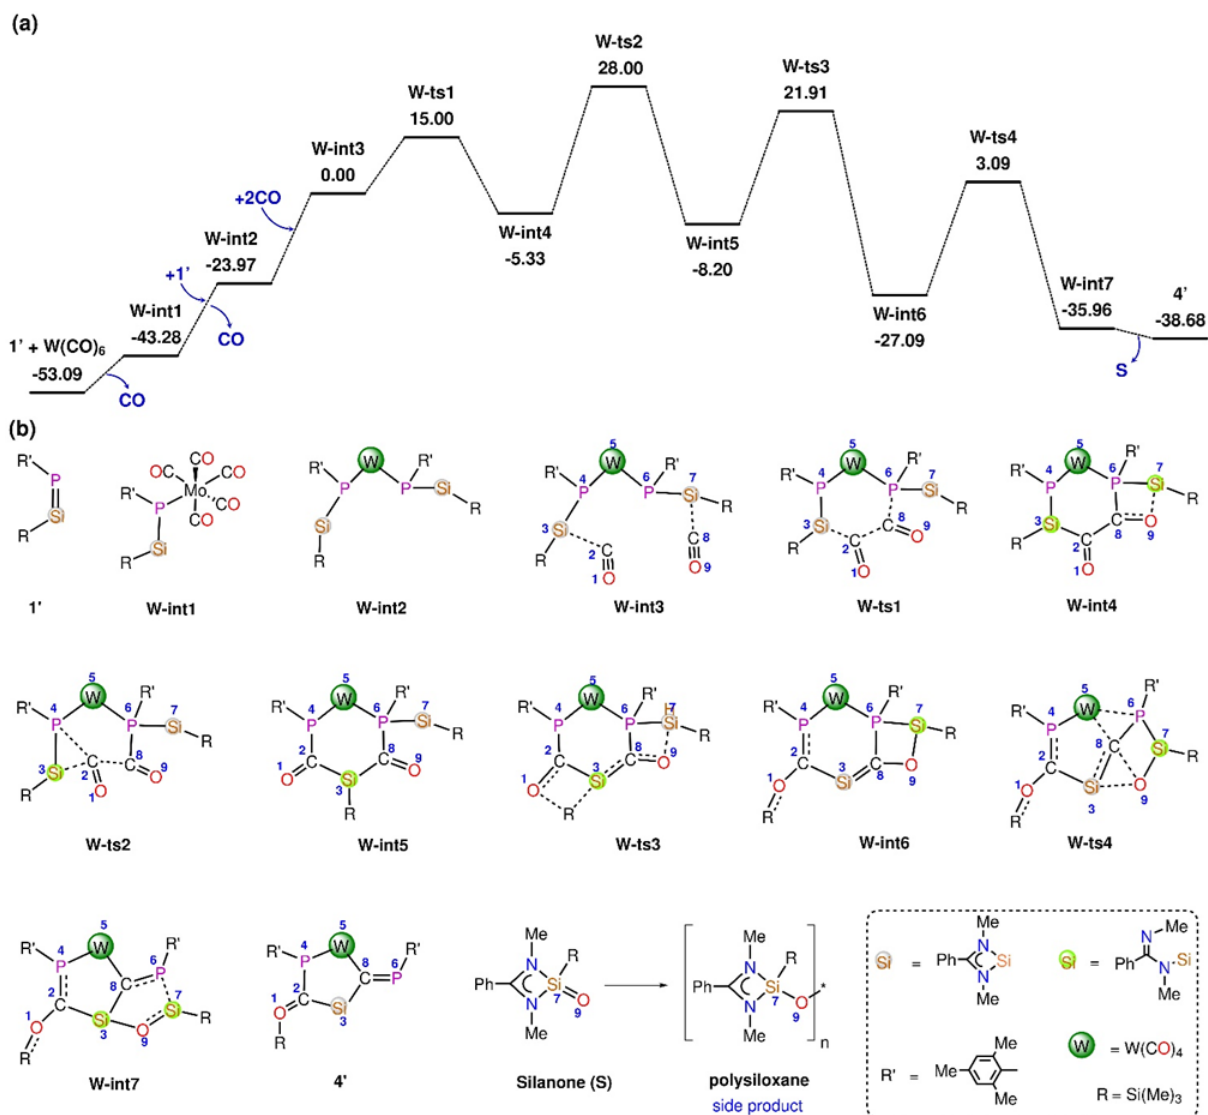

**Figure S47.** (a) The Gibbs free energy profile for the reaction of 1' with W(CO)<sub>6</sub> obtained at the B3LYP-D3/6-31G\* level of theory. (b) Different stationary point structures existing along the reaction pathway. The substituents connected to Si, W, and P, are omitted in the images for clarity. The energies are given in kcal/mol.

**Table S6.** Geometrical parameters of Fe-int3 and W-int3 obtained at the B3LYP/6-31G\* W (LanL2DZ) level of theory.

(X = Fe, W)

| Angles              | Fe-int3 | W-int3  |
|---------------------|---------|---------|
| < P(4)X(5)P(6)      | 170.16  | 77.28   |
| < X(5)P(4)Si(3)     | 123.20  | 122.06  |
| < X(5)P(4)Si(7)     | 97.08   | 112.04  |
| < P(6)X(5)P(4)Si(3) | 98.45   | -118.07 |
| < P(4)X(5)P(6)Si(7) | -84.43  | 165.65  |

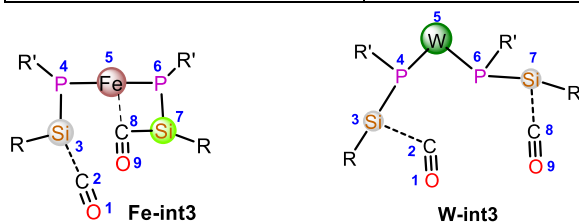

**XYZ Coordinates of the stationary point structures obtained for the reaction of 1' with Fe(CO)<sub>5</sub> at the B3LYP-D3/6-31G\* level of theory.**

1

102

|    |             |             |             |
|----|-------------|-------------|-------------|
| Si | -1.09488800 | 1.33538700  | 0.16315300  |
| N  | -1.20406100 | -0.11272600 | -1.01279400 |
| C  | -2.89423900 | -1.95783600 | -0.64051300 |
| P  | 0.67040700  | 2.12378300  | 1.06635000  |
| Si | -2.39668400 | 3.10815800  | -0.70520900 |
| N  | -2.37091200 | 0.04181500  | 0.79579000  |
| C  | -4.07218500 | -1.90087400 | -1.39572700 |
| H  | -4.43224500 | -0.94336300 | -1.76009500 |
| C  | -4.76688300 | -3.07411500 | -1.69129200 |
| H  | -5.67963200 | -3.02543800 | -2.27790300 |
| C  | -4.28805500 | -4.30534200 | -1.23693100 |
| H  | -4.83035200 | -5.21771200 | -1.46781600 |

|   |             |             |             |
|---|-------------|-------------|-------------|
| C | -3.11134200 | -4.36259100 | -0.48591900 |
| H | -2.73656900 | -5.31769500 | -0.12969700 |
| C | -2.41490700 | -3.19236300 | -0.18500800 |
| H | -1.51030400 | -3.22861500 | 0.41395000  |
| C | -2.17067200 | -0.70677200 | -0.29155700 |
| C | -0.49302300 | -0.57576000 | -2.22922600 |
| C | -1.26985400 | 4.25312500  | -1.71071900 |
| H | -1.84419500 | 5.08810300  | -2.13276300 |
| H | -0.78252900 | 3.72543100  | -2.53817600 |
| H | -0.48063900 | 4.66220000  | -1.07127100 |
| C | -3.42133800 | -0.02056400 | 1.84045400  |
| C | 2.05571400  | 0.84620100  | 0.88739200  |
| C | 3.10455700  | 1.12971800  | -0.05783300 |
| C | 3.86705400  | 0.06208500  | -0.55165700 |
| H | 4.60848000  | 0.26615700  | -1.30807300 |
| C | 3.71284400  | -1.25558500 | -0.11966500 |
| C | 2.85582900  | -1.45114400 | 0.95944000  |
| H | 2.79654500  | -2.44405000 | 1.38820500  |
| C | 2.07883700  | -0.42990700 | 1.52959000  |
| C | -3.19322100 | 4.15459000  | 0.66595000  |
| H | -3.70987800 | 5.01782400  | 0.22670700  |
| H | -2.42424300 | 4.53548900  | 1.34792700  |
| H | -3.92277500 | 3.59787100  | 1.26328600  |
| C | -3.73330000 | 2.40769400  | -1.86428900 |
| H | -4.37936500 | 3.21362000  | -2.23471400 |
| H | -4.37132900 | 1.66802400  | -1.36970500 |
| H | -3.27174300 | 1.92498600  | -2.73329700 |
| C | 3.52638200  | 2.56433500  | -0.52046900 |
| C | 4.51970800  | -2.43093000 | -0.69551300 |
| C | 1.36935200  | -0.82284100 | 2.86196200  |
| C | 4.95021200  | 2.56852800  | -1.13325600 |
| C | 2.59032400  | 3.15712300  | -1.59907300 |
| C | 3.60565600  | 3.51008600  | 0.70302700  |
| C | 5.32773500  | -2.02939500 | -1.94384500 |

|   |             |             |             |
|---|-------------|-------------|-------------|
| C | 5.50745800  | -2.94079700 | 0.38053500  |
| C | 3.56850600  | -3.58192200 | -1.09547500 |
| C | 0.10827500  | -1.65421400 | 2.55845100  |
| C | 0.99845900  | 0.37081600  | 3.76381300  |
| C | 2.32787200  | -1.69353300 | 3.72420500  |
| C | -4.76172600 | 0.49543800  | 1.28302400  |
| C | -2.94538400 | 0.89470900  | 2.98192700  |
| C | -3.62362900 | -1.44350800 | 2.39781400  |
| C | 0.46477500  | 0.55238800  | -2.63524500 |
| C | -1.47463100 | -0.84431400 | -3.38454100 |
| C | 0.33116100  | -1.83532300 | -1.90953100 |
| H | 1.19336000  | 0.74510300  | -1.84659800 |
| H | 1.00806000  | 0.26385300  | -3.54131000 |
| H | -0.07826500 | 1.47998000  | -2.84538200 |
| H | -2.10000900 | 0.03498400  | -3.57300600 |
| H | -0.90878900 | -1.06326500 | -4.29669700 |
| H | -2.12609400 | -1.69683200 | -3.18226300 |
| H | 1.00184500  | -1.64896900 | -1.06602900 |
| H | -0.31301800 | -2.68595200 | -1.67161400 |
| H | 0.93868000  | -2.10817900 | -2.77972100 |
| H | -4.67032500 | 1.52277600  | 0.92308200  |
| H | -5.10911200 | -0.13385700 | 0.45793700  |
| H | -5.52592500 | 0.47641400  | 2.06819100  |
| H | -2.77009300 | 1.91592300  | 2.62941400  |
| H | -3.70700000 | 0.93224000  | 3.76764500  |
| H | -2.01386200 | 0.52292800  | 3.41711900  |
| H | -4.27242700 | -1.38611600 | 3.27861100  |
| H | -4.10326400 | -2.10529700 | 1.67432100  |
| H | -2.67399600 | -1.88920000 | 2.70314100  |
| H | -0.61927000 | -1.05993700 | 2.00490900  |
| H | 0.35706100  | -2.53931400 | 1.95943800  |
| H | -0.36425400 | -1.99752200 | 3.48858400  |
| H | 0.60941000  | -0.00465800 | 4.71876200  |
| H | 1.87976800  | 0.98791300  | 3.97444600  |

|   |            |             |             |
|---|------------|-------------|-------------|
| H | 0.24955900 | 1.01939300  | 3.31260000  |
| H | 1.87965300 | -1.85584700 | 4.71127600  |
| H | 2.51962800 | -2.68277700 | 3.29915400  |
| H | 3.29232200 | -1.19344500 | 3.86577700  |
| H | 4.98091500 | -3.28518700 | 1.27716200  |
| H | 6.10109400 | -3.77908300 | -0.00598200 |
| H | 6.19610200 | -2.14345700 | 0.68275000  |
| H | 6.08877700 | -1.27578900 | -1.71276400 |
| H | 5.84586300 | -2.90627000 | -2.34900800 |
| H | 4.67775500 | -1.62868800 | -2.73045200 |
| H | 2.87917200 | -3.26144300 | -1.88363700 |
| H | 4.14308200 | -4.43785500 | -1.47089200 |
| H | 2.96887300 | -3.93023100 | -0.24811800 |
| H | 2.92526600 | 4.16802200  | -1.86681300 |
| H | 2.61559400 | 2.54502800  | -2.50837100 |
| H | 1.56057300 | 3.21376000  | -1.24627800 |
| H | 5.25067300 | 3.60594600  | -1.31913300 |
| H | 5.68964800 | 2.12112500  | -0.45928500 |
| H | 4.99950900 | 2.04789200  | -2.09593200 |
| H | 2.63289600 | 3.65944200  | 1.17453600  |
| H | 4.29519900 | 3.10703000  | 1.45437700  |
| H | 3.97892600 | 4.49338000  | 0.39024700  |

**I'**

57

|    |             |             |             |
|----|-------------|-------------|-------------|
| Si | 1.65615500  | -0.46114800 | 0.15924300  |
| N  | 0.46095800  | 0.39856400  | -1.00762500 |
| C  | -1.14848000 | 2.11697000  | -0.13979200 |
| P  | 1.27773700  | -2.51958600 | 0.59136800  |
| Si | 3.79998500  | 0.41635300  | -0.24171600 |
| N  | 0.68845800  | 0.89506900  | 1.06533900  |
| C  | -1.02886200 | 3.44671300  | 0.28736300  |
| H  | -0.08102800 | 3.80629400  | 0.67648800  |



|   |             |             |             |
|---|-------------|-------------|-------------|
| C | -2.12205100 | 4.30720100  | 0.19199700  |
| H | -2.02509700 | 5.34006300  | 0.51356000  |
| C | -3.33863400 | 3.84026400  | -0.31275600 |
| H | -4.19042600 | 4.51119900  | -0.37996300 |
| C | -3.46199900 | 2.51145600  | -0.72823800 |
| H | -4.40943400 | 2.14531000  | -1.11334800 |
| C | -2.37002400 | 1.64895200  | -0.64920200 |
| H | -2.46487900 | 0.60911800  | -0.94611700 |
| C | -0.01676600 | 1.17748800  | -0.03157800 |
| C | 0.03194000  | 0.35424200  | -2.38917400 |
| C | 4.33035200  | 0.00744200  | -2.01709300 |
| H | 5.32585600  | 0.41842500  | -2.22861800 |
| H | 3.63069600  | 0.42956500  | -2.74834600 |
| H | 4.36925300  | -1.07591300 | -2.17656700 |
| C | 0.56612000  | 1.49293800  | 2.37540400  |
| C | -0.58924500 | -2.32021700 | 0.37657600  |
| C | -1.19278000 | -2.55842700 | -0.88458200 |
| C | -2.55921200 | -2.30029000 | -1.06665400 |
| H | -3.00163300 | -2.47710800 | -2.04604800 |
| C | -3.36965500 | -1.82995100 | -0.03115800 |
| C | -2.78335600 | -1.66988000 | 1.22660200  |
| H | -3.40337800 | -1.34265000 | 2.06004600  |
| C | -1.42453400 | -1.91991400 | 1.45204100  |
| C | 5.05766900  | -0.29488300 | 0.98375100  |
| H | 6.06118400  | 0.10206100  | 0.78409000  |
| H | 5.10440400  | -1.38716600 | 0.90820100  |
| H | 4.79359600  | -0.04327100 | 2.01724200  |
| C | 3.67872500  | 2.30146500  | -0.03717400 |
| H | 4.62900400  | 2.78889000  | -0.28865300 |
| H | 3.42332300  | 2.57045500  | 0.99447100  |
| H | 2.90369800  | 2.71666000  | -0.69262100 |
| C | -0.40550800 | -3.10482700 | -2.05559300 |

|   |             |             |             |
|---|-------------|-------------|-------------|
| C | -4.82489700 | -1.49196800 | -0.25664700 |
| C | -0.89669800 | -1.78926400 | 2.86284700  |
| H | 1.00252500  | 0.81300800  | 3.11109100  |
| H | 1.10367900  | 2.44798700  | 2.43811900  |
| H | -0.48361300 | 1.66481900  | 2.63744800  |
| H | -0.80819500 | -0.33533500 | -2.52603400 |
| H | -0.26889800 | 1.34885900  | -2.73488200 |
| H | 0.86599000  | 0.00705200  | -3.00453600 |
| H | -1.67884900 | -1.43857400 | 3.54520700  |
| H | -0.52964500 | -2.75516800 | 3.23061800  |
| H | -0.04969400 | -1.10331700 | 2.92043500  |
| H | -1.05045700 | -3.24156200 | -2.93101200 |
| H | 0.42446900  | -2.44852600 | -2.33457400 |
| H | 0.04672700  | -4.07207600 | -1.80782500 |
| H | -5.45820000 | -1.87992800 | 0.54986100  |
| H | -4.97871000 | -0.40407700 | -0.28638000 |
| H | -5.19282000 | -1.90266800 | -1.20288300 |

**2'**

88

|    |             |             |             |
|----|-------------|-------------|-------------|
| Fe | -2.14369000 | -1.94811900 | -1.15530700 |
| P  | -2.34036500 | 0.06694300  | -0.46802700 |
| Si | 1.82392400  | -1.70833200 | 0.36570700  |
| O  | 0.68952800  | -2.70582300 | -0.73298500 |
| N  | 2.97448200  | -1.18574500 | -0.95557000 |
| C  | 4.49023900  | 0.82589000  | -0.77721700 |
| P  | -0.80214600 | 0.45297500  | 1.07254100  |
| Si | 2.40804800  | -3.44132200 | 1.82656400  |
| O  | -2.50536100 | -3.95390000 | 0.91100800  |
| N  | 3.04810100  | -0.23915400 | 0.96808800  |
| C  | 5.54728100  | 1.29420400  | 0.01770800  |
| H  | 5.71326300  | 0.86143400  | 0.99883700  |

|   |             |             |             |
|---|-------------|-------------|-------------|
| O | -1.04543400 | -3.56328800 | -3.36721500 |
| C | 6.38762000  | 2.30126700  | -0.45423300 |
| H | 7.20663900  | 2.65444400  | 0.16552400  |
| O | -4.94321900 | -1.82500400 | -2.07843300 |
| C | 6.17545900  | 2.85460900  | -1.71978300 |
| H | 6.82741100  | 3.64347100  | -2.08419800 |
| C | 5.12627100  | 2.39024000  | -2.51770200 |
| H | 4.95667000  | 2.81978600  | -3.50080800 |
| C | 4.28994100  | 1.37729800  | -2.05253200 |
| H | 3.46075100  | 1.03583500  | -2.66183100 |
| C | 3.55199500  | -0.18370800 | -0.24902500 |
| C | 3.29630300  | -1.67614200 | -2.27991800 |
| C | -0.30452100 | -1.83250100 | -0.42517000 |
| C | 0.18460600  | -0.86913500 | 0.44419000  |
| C | 0.80419900  | -4.07974000 | 2.61228900  |
| H | 0.98802400  | -4.96253800 | 3.23757500  |
| H | 0.07997100  | -4.35250900 | 1.83704200  |
| H | 0.33896000  | -3.31012300 | 3.23905500  |
| C | 3.12027000  | 0.76492900  | 2.00586300  |
| C | -3.84578300 | 1.02018800  | -0.04286900 |
| C | -4.01924800 | 2.29895000  | -0.62345200 |
| C | -5.16835300 | 3.03292000  | -0.31910800 |
| H | -5.30209200 | 4.01401700  | -0.77046700 |
| C | -6.14729700 | 2.54299900  | 0.55020900  |
| C | -5.95146100 | 1.28371400  | 1.12235600  |
| H | -6.70073300 | 0.89152100  | 1.80712300  |
| C | -4.81957800 | 0.50888000  | 0.84690600  |
| C | 0.15420800  | 2.00909100  | 0.68293100  |
| C | 0.82816700  | 2.25220600  | -0.54433700 |
| C | 1.70846300  | 3.33468100  | -0.62975700 |
| H | 2.24251900  | 3.50039400  | -1.56273100 |
| C | 1.94029700  | 4.19883000  | 0.44347600  |

|   |             |             |             |
|---|-------------|-------------|-------------|
| C | 1.21849900  | 3.98745100  | 1.61802400  |
| H | 1.35929800  | 4.66575900  | 2.45702300  |
| C | 0.32852700  | 2.91445200  | 1.75750900  |
| C | 3.59252600  | -2.82717500 | 3.17809800  |
| H | 3.86666900  | -3.63434100 | 3.86907600  |
| H | 3.13189600  | -2.02363500 | 3.76525200  |
| H | 4.51438700  | -2.42858700 | 2.73829500  |
| C | 3.23170000  | -4.83706500 | 0.83611800  |
| H | 3.45935800  | -5.69713500 | 1.47868800  |
| H | 4.16975800  | -4.50399700 | 0.37583300  |
| H | 2.56668200  | -5.17874300 | 0.03472200  |
| C | -2.36501800 | -3.18416500 | 0.06158200  |
| C | -1.48645200 | -2.94915600 | -2.50049300 |
| C | -3.83814700 | -1.86964800 | -1.75272900 |
| C | -2.98527600 | 2.89445100  | -1.55532300 |
| C | -7.36470700 | 3.36923800  | 0.89040100  |
| C | -4.68129800 | -0.84154300 | 1.51372900  |
| C | 0.63493300  | 1.40699000  | -1.78027600 |
| C | 2.93744500  | 5.32505200  | 0.31221900  |
| C | -0.39478700 | 2.75869900  | 3.08148300  |
| H | -7.16645600 | 4.02424700  | 1.74936700  |
| H | -7.65983300 | 4.01146100  | 0.05369400  |
| H | -8.21866400 | 2.73634700  | 1.15383200  |
| H | -3.67989100 | -0.98914300 | 1.93066500  |
| H | -5.40874700 | -0.94893200 | 2.32405500  |
| H | -4.85528200 | -1.65770900 | 0.80340400  |
| H | -0.20182200 | 3.62248500  | 3.72567800  |
| H | -1.47808600 | 2.67306100  | 2.94777700  |
| H | -0.07178100 | 1.86059000  | 3.62128500  |
| H | 3.91268100  | 4.94420700  | -0.01552100 |
| H | 2.61186600  | 6.05988300  | -0.43499800 |
| H | 3.07891000  | 5.85256100  | 1.26077200  |

|   |             |             |             |
|---|-------------|-------------|-------------|
| H | 1.10527100  | 0.42595300  | -1.67786600 |
| H | -0.42496000 | 1.22050100  | -1.97548100 |
| H | 1.05997100  | 1.90749700  | -2.65596700 |
| H | 3.26248200  | 1.77155600  | 1.59856400  |
| H | 2.17667700  | 0.75636000  | 2.55902100  |
| H | 3.92747700  | 0.54941300  | 2.71798900  |
| H | 3.15740600  | -2.75976300 | -2.30121000 |
| H | 2.63627600  | -1.24125600 | -3.04173400 |
| H | 4.33366000  | -1.44628700 | -2.54361300 |
| H | -2.82061000 | 2.26182100  | -2.43584300 |
| H | -3.29922700 | 3.88247800  | -1.90626300 |
| H | -2.01506400 | 3.01002300  | -1.05675100 |

**Optimized structure of the side product Silanone (S)**

37

|    |              |              |              |
|----|--------------|--------------|--------------|
| Si | 1.516143000  | -0.985974000 | 0.736244000  |
| O  | 2.195461000  | -2.086649000 | 1.582276000  |
| N  | -0.015236000 | -1.354146000 | -0.326576000 |
| C  | -2.138575000 | -0.079149000 | 0.087675000  |
| Si | 2.634807000  | 0.655286000  | -0.533648000 |
| N  | 0.004813000  | -0.057276000 | 1.393184000  |
| C  | -2.474978000 | 1.285285000  | 0.081264000  |
| H  | -1.705494000 | 2.031319000  | 0.288597000  |
| C  | -3.779745000 | 1.683121000  | -0.215482000 |
| H  | -4.033467000 | 2.745770000  | -0.229341000 |
| C  | -4.758937000 | 0.723694000  | -0.494994000 |
| H  | -5.781115000 | 1.036664000  | -0.721888000 |
| C  | -4.430249000 | -0.636091000 | -0.484632000 |
| H  | -5.195066000 | -1.386561000 | -0.698229000 |
| C  | -3.123705000 | -1.038300000 | -0.200929000 |
| H  | -2.865552000 | -2.099136000 | -0.185100000 |
| C  | -0.752321000 | -0.499945000 | 0.389024000  |

|   |              |              |              |
|---|--------------|--------------|--------------|
| C | -0.323719000 | -1.965582000 | -1.595616000 |
| C | 4.018856000  | 1.451316000  | 0.480717000  |
| H | 4.557955000  | 2.207354000  | -0.115026000 |
| H | 4.743844000  | 0.690252000  | 0.810434000  |
| H | 3.621537000  | 1.946786000  | 1.381461000  |
| C | -0.357601000 | 0.767805000  | 2.516170000  |
| C | 1.371246000  | 1.987640000  | -1.027807000 |
| H | 1.827247000  | 2.742193000  | -1.690697000 |
| H | 0.982924000  | 2.510122000  | -0.138091000 |
| H | 0.512971000  | 1.545743000  | -1.560278000 |
| C | 3.366525000  | -0.103845000 | -2.108887000 |
| H | 3.920099000  | 0.656710000  | -2.685466000 |
| H | 2.578687000  | -0.513145000 | -2.762355000 |
| H | 4.063668000  | -0.921721000 | -1.866183000 |
| H | -1.445210000 | 0.758434000  | 2.689340000  |
| H | 0.141007000  | 0.388007000  | 3.421630000  |
| H | -0.044272000 | 1.818309000  | 2.374452000  |
| H | 0.586571000  | -2.004050000 | -2.213699000 |
| H | -0.678879000 | -3.003237000 | -1.469132000 |
| H | -1.092269000 | -1.402746000 | -2.150239000 |

### Fe-int1

66

|    |             |             |            |
|----|-------------|-------------|------------|
| P  | -1.12617300 | -0.63447700 | 0.82014500 |
| Si | -0.18605600 | 1.27811400  | 0.35290100 |
| Si | -1.41206300 | 3.24798000  | 0.75578700 |
| N  | 1.51096000  | 1.27166800  | 1.07185000 |
| C  | 0.34317400  | -1.76587700 | 0.59212700 |
| C  | 0.95270600  | -2.23908800 | 1.78309300 |
| C  | 2.15605000  | -2.95455200 | 1.70931500 |
| H  | 2.61898500  | -3.29934700 | 2.63188500 |
| C  | 2.77111000  | -3.24514400 | 0.49081100 |

|   |             |             |             |
|---|-------------|-------------|-------------|
| C | 2.12674000  | -2.82992000 | -0.67640200 |
| H | 2.57314200  | -3.07136300 | -1.63935600 |
| C | 0.92587300  | -2.11180900 | -0.65448500 |
| C | 0.34128600  | -2.01992100 | 3.15295100  |
| C | 4.08583900  | -3.98522000 | 0.42239900  |
| C | 0.28518100  | -1.78137300 | -1.98054900 |
| C | -2.98541800 | 3.25398700  | -0.28954500 |
| H | -3.48287800 | 4.22894700  | -0.21269400 |
| H | -3.67945000 | 2.48593600  | 0.06624100  |
| H | -2.77796300 | 3.05175500  | -1.34482200 |
| C | -0.27637600 | 4.69390500  | 0.29368100  |
| H | -0.76634000 | 5.65177600  | 0.50792400  |
| H | -0.03000100 | 4.67344700  | -0.77431400 |
| H | 0.66312300  | 4.66215200  | 0.85755200  |
| C | -1.85269900 | 3.27089400  | 2.59577500  |
| H | -2.40127500 | 4.18819600  | 2.84434000  |
| H | -0.96273300 | 3.22638100  | 3.23413400  |
| H | -2.49337500 | 2.41642000  | 2.84093500  |
| N | 1.06179100  | 1.48067300  | -1.01693700 |
| C | 1.14980900  | 1.63237700  | -2.45777500 |
| C | 2.16641300  | 1.07055500  | 2.34880700  |
| C | 2.07008200  | 1.34057100  | -0.14525100 |
| C | 3.50167100  | 1.20306000  | -0.46004500 |
| C | 4.20480800  | 0.10284300  | 0.05676300  |
| H | 3.68991900  | -0.62995500 | 0.66908700  |
| C | 5.55076600  | -0.06723600 | -0.26135100 |
| H | 6.09043700  | -0.92477300 | 0.12972900  |
| C | 6.20063200  | 0.85959700  | -1.08095900 |
| H | 7.25116700  | 0.72656400  | -1.32293500 |
| C | 5.50165100  | 1.95588200  | -1.59350600 |
| H | 6.00685000  | 2.67667100  | -2.22937000 |
| C | 4.15108900  | 2.12565200  | -1.29279600 |

|    |             |             |             |
|----|-------------|-------------|-------------|
| H  | 3.60637600  | 2.97795700  | -1.68662000 |
| H  | -0.09338000 | -0.76251000 | -2.02120900 |
| H  | 0.99561400  | -1.91832600 | -2.80203800 |
| H  | -0.57204600 | -2.43847100 | -2.16313800 |
| H  | 4.45825600  | -4.23967800 | 1.41977900  |
| H  | 3.98970400  | -4.91678400 | -0.14855800 |
| H  | 4.85207500  | -3.38097700 | -0.08059500 |
| H  | 0.29445000  | -0.96128200 | 3.42756700  |
| H  | -0.68825600 | -2.39226400 | 3.19080400  |
| H  | 0.92122100  | -2.54458600 | 3.91970500  |
| H  | 1.53960100  | 1.49801100  | 3.13503100  |
| H  | 2.31292700  | 0.00621100  | 2.55910000  |
| H  | 3.13919200  | 1.57123300  | 2.36127900  |
| H  | 1.35509900  | 2.67350800  | -2.73409800 |
| H  | 1.94051600  | 0.99572200  | -2.86729100 |
| H  | 0.19541700  | 1.34342600  | -2.89741700 |
| Fe | -3.12463300 | -0.97148700 | -0.46362200 |
| C  | -2.51581000 | 0.07546900  | -1.73649600 |
| C  | -3.90824500 | -0.18402200 | 0.93118300  |
| C  | -4.65562700 | -1.25221700 | -1.28953600 |
| C  | -2.67094700 | -2.69051200 | -0.47346100 |
| O  | -5.65982500 | -1.43617100 | -1.83624800 |
| O  | -2.32374000 | -3.79797700 | -0.52383100 |
| O  | -2.10752400 | 0.79419100  | -2.56399900 |
| O  | -4.37984300 | 0.41779900  | 1.80743500  |

**Fe-ts1'**

68

|    |             |            |            |
|----|-------------|------------|------------|
| P  | 1.45849800  | 0.52380800 | 0.08735600 |
| Si | -0.92202700 | 1.48162500 | 0.17771100 |
| Si | -1.38299700 | 3.69258900 | 0.90280800 |



|   |             |             |             |
|---|-------------|-------------|-------------|
| N | -1.85482500 | 0.95196600  | -1.33162500 |
| C | 0.64931000  | -0.84338900 | 1.14637200  |
| C | 0.05365900  | -1.98647900 | 0.56943400  |
| C | -0.45722000 | -2.97841500 | 1.41531900  |
| H | -0.91097700 | -3.86330800 | 0.97083100  |
| C | -0.37498900 | -2.88329700 | 2.80847400  |
| C | 0.22107500  | -1.74299200 | 3.35553800  |
| H | 0.29487200  | -1.65075300 | 4.43767700  |
| C | 0.73424800  | -0.71797200 | 2.55195700  |
| C | 0.24976900  | 4.57580300  | 1.24759500  |
| H | 0.06220900  | 5.57614400  | 1.65714600  |
| H | 0.83902400  | 4.68284300  | 0.33192000  |
| H | 0.85501500  | 4.02169600  | 1.97400900  |
| C | -2.37701900 | 3.52617000  | 2.51049700  |
| H | -2.57706200 | 4.51981400  | 2.93094100  |
| H | -1.82688500 | 2.95313300  | 3.26655600  |
| H | -3.34145800 | 3.03370800  | 2.34280000  |
| C | -2.39694900 | 4.58743700  | -0.42027200 |
| H | -2.67201500 | 5.59514000  | -0.08402600 |
| H | -3.31966700 | 4.04281800  | -0.65074500 |
| H | -1.81789800 | 4.68093700  | -1.34523400 |
| N | -2.26397100 | 0.34007700  | 0.68740700  |
| C | -2.86246800 | -0.17666600 | 1.90302800  |
| C | -1.58833100 | 0.88055300  | -2.76060100 |
| C | -2.62035900 | 0.12862100  | -0.59177900 |
| H | -1.89342000 | 1.81031700  | -3.24995100 |
| H | -0.51848000 | 0.73203200  | -2.93447200 |
| H | -2.12867300 | 0.04419400  | -3.20977000 |
| H | -3.89978500 | -0.47298100 | 1.72391600  |
| H | -2.29940000 | -1.03756100 | 2.27355500  |
| H | -2.84886400 | 0.60451900  | 2.66738800  |
| C | 2.47455800  | -0.44545200 | -2.36697500 |
| C | 3.31412400  | -1.94630900 | -0.03184600 |
| C | 4.93846500  | -0.73123200 | -1.71223400 |

|    |             |             |             |
|----|-------------|-------------|-------------|
| C  | 4.19541800  | 0.82447300  | 0.19538100  |
| O  | 5.92729700  | -0.94708200 | -2.27591800 |
| O  | 4.69885000  | 1.55339900  | 0.94855000  |
| O  | 1.80780300  | -0.55091000 | -3.31798400 |
| O  | 3.24967000  | -2.98650100 | 0.47786300  |
| C  | 1.12212600  | 1.85704000  | -0.98064100 |
| O  | 0.67795700  | 2.81437400  | -1.53523400 |
| C  | -3.61989100 | -0.83196300 | -1.07453500 |
| C  | -3.66554600 | -2.12451400 | -0.52539700 |
| C  | -4.52489800 | -0.46773600 | -2.08451000 |
| C  | -4.60343100 | -3.04270400 | -0.99204200 |
| H  | -2.94970200 | -2.40958200 | 0.23897900  |
| C  | -5.46694300 | -1.38863300 | -2.53787600 |
| H  | -4.49779700 | 0.53704800  | -2.49477000 |
| C  | -5.50518800 | -2.67610600 | -1.99505800 |
| H  | -4.62853300 | -4.04527100 | -0.57559800 |
| H  | -6.17087100 | -1.10228600 | -3.31342800 |
| H  | -6.23716900 | -3.39367900 | -2.35421400 |
| C  | -0.88618900 | -3.99484600 | 3.69349700  |
| C  | 1.37409100  | 0.48629200  | 3.21141200  |
| C  | -0.01145600 | -2.20674400 | -0.92400000 |
| H  | 0.80030800  | 1.40435800  | 3.02850700  |
| H  | 1.44179100  | 0.34585900  | 4.29464600  |
| H  | 2.38331600  | 0.67071700  | 2.82713300  |
| H  | -1.72526000 | -4.52461100 | 3.22942200  |
| H  | -0.09905600 | -4.73634900 | 3.88331200  |
| H  | -1.21658400 | -3.61533800 | 4.66634400  |
| H  | -0.81143200 | -2.90694600 | -1.18409100 |
| H  | -0.17238600 | -1.27962500 | -1.47828000 |
| H  | 0.93350500  | -2.62422200 | -1.29012400 |
| Fe | 3.42651400  | -0.38788700 | -0.86735100 |

**Fe-int2'**

68

|    |             |             |             |
|----|-------------|-------------|-------------|
| P  | 1.37643000  | -0.42466700 | -0.69588300 |
| Si | -1.19669100 | 1.48831400  | 0.15499900  |
| Si | -1.26339400 | 3.55301700  | 1.27536400  |
| N  | -2.33556400 | 1.25784700  | -1.25630700 |
| C  | 0.72622600  | -1.35442900 | 0.76820100  |
| C  | -0.03715400 | -2.52433400 | 0.52434500  |
| C  | -0.46600000 | -3.30567100 | 1.60097400  |
| H  | -1.04341100 | -4.20651400 | 1.40184200  |
| C  | -0.17690800 | -2.96315200 | 2.92491600  |
| C  | 0.56289100  | -1.80196200 | 3.15332000  |
| H  | 0.80497600  | -1.52178800 | 4.17667000  |
| C  | 1.03024000  | -0.99625500 | 2.10469200  |
| C  | -0.42068600 | -2.95450000 | -0.87603800 |
| C  | -0.68078700 | -3.80876900 | 4.07010500  |
| C  | 1.89095200  | 0.19522700  | 2.45598200  |
| C  | 0.41186800  | 3.79750300  | 2.11045800  |
| H  | 0.48272000  | 4.80978100  | 2.52727200  |
| H  | 1.22880500  | 3.66484500  | 1.39279300  |
| H  | 0.56233700  | 3.08578500  | 2.92971100  |
| C  | -2.67325100 | 3.46772200  | 2.53686500  |
| H  | -2.75491600 | 4.41262800  | 3.08797900  |
| H  | -2.50635200 | 2.66734100  | 3.26720300  |
| H  | -3.63583900 | 3.28155000  | 2.04635400  |
| C  | -1.58204600 | 4.88675300  | -0.02587900 |
| H  | -1.58934800 | 5.88126000  | 0.43740700  |
| H  | -2.54552000 | 4.74081500  | -0.52788600 |
| H  | -0.79255400 | 4.86636100  | -0.78439800 |
| N  | -2.45121100 | 0.22647500  | 0.62141900  |
| C  | -2.74446900 | -0.68854100 | 1.70831900  |
| C  | -2.49338000 | 1.75105100  | -2.61065100 |

|   |             |             |             |
|---|-------------|-------------|-------------|
| C | -3.00677600 | 0.29672000  | -0.60187500 |
| C | -4.08726400 | -0.54961600 | -1.12730500 |
| C | -3.95177800 | -1.14462700 | -2.39246900 |
| H | -3.05148700 | -0.97962500 | -2.97562200 |
| C | -4.95947500 | -1.97442000 | -2.87983400 |
| H | -4.84675600 | -2.44317900 | -3.85255100 |
| C | -6.10805100 | -2.20284100 | -2.11762000 |
| H | -6.89416600 | -2.84585700 | -2.50246700 |
| C | -6.24714600 | -1.60890700 | -0.86013900 |
| H | -7.14091000 | -1.78445900 | -0.26921000 |
| C | -5.23712600 | -0.79058200 | -0.35904900 |
| H | -5.34625900 | -0.32352900 | 0.61447300  |
| H | 1.64417100  | 1.08670900  | 1.87641100  |
| H | 1.80366500  | 0.44007300  | 3.51932000  |
| H | 2.94463100  | -0.02075700 | 2.24651200  |
| H | -0.62584400 | -4.87658400 | 3.83142600  |
| H | -0.10363600 | -3.63363400 | 4.98365800  |
| H | -1.73162700 | -3.58196800 | 4.29597700  |
| H | -1.08471600 | -2.22178100 | -1.35063000 |
| H | 0.45373500  | -3.05253600 | -1.52800700 |
| H | -0.94190000 | -3.91713500 | -0.85693900 |
| H | -2.33866900 | 2.83262500  | -2.61429800 |
| H | -1.75487400 | 1.29630200  | -3.28005000 |
| H | -3.49814500 | 1.53390000  | -2.98264800 |
| H | -3.52163200 | -0.28288700 | 2.36687500  |
| H | -3.07016200 | -1.65838600 | 1.32369800  |
| H | -1.83278400 | -0.84009900 | 2.28781000  |
| C | 3.56205900  | 1.35920900  | -0.22810400 |
| C | 3.44495000  | -0.61854800 | -2.67647600 |
| C | 5.44750900  | -0.09493200 | -1.16968800 |
| O | 6.59148500  | 0.01882900  | -1.31087300 |
| O | 3.45822200  | 2.39221700  | 0.29479800  |
| O | 3.27752400  | -0.86488600 | -3.79833800 |
| C | 0.50639000  | 1.10951500  | -0.56567400 |

|    |            |             |             |
|----|------------|-------------|-------------|
| O  | 0.70480100 | 2.19173300  | -1.16980200 |
| C  | 3.87343900 | -1.59402700 | 0.21114900  |
| O  | 3.98228200 | -2.43368200 | 1.00721000  |
| Fe | 3.70803000 | -0.26028200 | -0.94178500 |

**Fe-int2**

121

|    |            |            |             |
|----|------------|------------|-------------|
| P  | 2.36306900 | 0.21042600 | -1.64233900 |
| Si | 3.21179900 | 1.40203500 | -0.03795100 |
| Si | 2.60662700 | 3.66956400 | 0.08222600  |
| N  | 3.54828800 | 0.72720500 | 1.67628600  |
| C  | 1.32146300 | 4.00044100 | -1.26067600 |
| H  | 0.89751800 | 5.00800400 | -1.16866300 |
| H  | 0.51036700 | 3.26926700 | -1.19797300 |
| H  | 1.76200600 | 3.89935500 | -2.25862100 |
| C  | 4.15719900 | 4.73176000 | -0.18368100 |
| H  | 3.91477000 | 5.79883000 | -0.10039800 |
| H  | 4.58514000 | 4.56236200 | -1.17857700 |
| H  | 4.92957500 | 4.50228800 | 0.55971100  |
| C  | 1.90825100 | 3.96572900 | 1.81973700  |
| H  | 1.49178900 | 4.97649800 | 1.91138300  |
| H  | 2.69276700 | 3.85135400 | 2.57745500  |
| H  | 1.11339900 | 3.24656100 | 2.04123100  |
| N  | 5.01371900 | 1.03069300 | 0.13966800  |
| C  | 4.83217900 | 0.51408200 | 1.36483600  |

|    |             |             |             |
|----|-------------|-------------|-------------|
| Fe | 0.02808500  | 0.06047800  | -1.54932500 |
| C  | -0.01772300 | 1.06338700  | -3.02285000 |
| C  | 0.12693600  | -1.67750700 | -1.76093100 |
| C  | 0.00183300  | 0.66689000  | 0.06877200  |
| O  | 0.19274200  | -2.84471800 | -1.82541200 |
| O  | 0.00474800  | 1.04290300  | 1.19816800  |
| O  | -0.04203800 | 1.76816700  | -3.95571000 |
| P  | -2.29974900 | -0.08338000 | -1.68467200 |
| C  | -3.17332000 | -1.66419400 | -1.17904200 |
| C  | -4.16798200 | -2.15478500 | -2.06390300 |
| C  | -2.95315100 | -2.35834000 | 0.03931800  |
| C  | -4.96066600 | -3.24841900 | -1.68751500 |
| C  | -3.76964700 | -3.44545700 | 0.37301300  |
| C  | -4.78999000 | -3.89945700 | -0.46492300 |
| H  | -5.72806000 | -3.60251400 | -2.37378000 |
| H  | -3.60273000 | -3.95227200 | 1.32230800  |
| Si | -3.34168600 | 1.27180600  | -0.34799700 |
| N  | -3.70691600 | 0.88475000  | 1.45272000  |
| N  | -5.10763900 | 0.75103200  | -0.16687200 |
| Si | -2.98596400 | 3.58495500  | -0.55440900 |
| C  | -4.94459300 | 0.48480300  | 1.13712900  |
| C  | -6.26663500 | 0.49466100  | -0.99609200 |
| C  | -3.03500400 | 0.78794900  | 2.73390700  |
| H  | -6.22744800 | -0.50697800 | -1.43694900 |

|   |             |             |             |
|---|-------------|-------------|-------------|
| H | -7.18599100 | 0.58780600  | -0.40968400 |
| H | -6.29016200 | 1.22973200  | -1.80464700 |
| H | -1.95886400 | 0.83409800  | 2.56119300  |
| H | -3.31458400 | 1.61891600  | 3.39327700  |
| H | -3.27726600 | -0.15514000 | 3.23533800  |
| C | -5.90875500 | -0.19412000 | 2.01983000  |
| C | -6.21451200 | 0.32156200  | 3.28754700  |
| C | -6.49093800 | -1.39812600 | 1.59183300  |
| C | -7.10932700 | -0.35532400 | 4.11494600  |
| H | -5.76580000 | 1.25439800  | 3.61462300  |
| C | -7.37335900 | -2.07615100 | 2.43076700  |
| H | -6.22138600 | -1.81576400 | 0.62765300  |
| C | -7.68700000 | -1.55445300 | 3.68872900  |
| H | -7.35332800 | 0.05107900  | 5.09208300  |
| H | -7.81282600 | -3.01347700 | 2.10202100  |
| H | -8.37870100 | -2.08317600 | 4.33848200  |
| C | -1.83406600 | -2.00992200 | 0.99073600  |
| C | -5.66211500 | -5.06413500 | -0.05821900 |
| C | -4.40541800 | -1.54419000 | -3.43078100 |
| H | -0.88122600 | -2.37470200 | 0.59525000  |
| H | -1.71128600 | -0.93801200 | 1.12534400  |
| H | -1.99744800 | -2.47091400 | 1.97103000  |
| H | -6.49983000 | -5.20113600 | -0.74998800 |
| H | -5.09223600 | -6.00193700 | -0.03713900 |

|   |             |             |             |
|---|-------------|-------------|-------------|
| H | -6.07389900 | -4.91873700 | 0.94864300  |
| H | -5.15313300 | -2.12177000 | -3.98571300 |
| H | -4.75086400 | -0.50716200 | -3.36945800 |
| H | -3.48217000 | -1.52409900 | -4.02010800 |
| C | 5.82970200  | -0.21229200 | 2.16917200  |
| C | 6.56184400  | -1.25249100 | 1.57445700  |
| C | 6.02260500  | 0.09566700  | 3.52390500  |
| C | 7.47926900  | -1.97526200 | 2.33487700  |
| H | 6.38159700  | -1.51647500 | 0.53813200  |
| C | 6.95284800  | -0.62239500 | 4.27386900  |
| H | 5.45687000  | 0.90202300  | 3.98044400  |
| C | 7.67946900  | -1.65874600 | 3.68119500  |
| H | 8.03429600  | -2.78810000 | 1.87552000  |
| H | 7.10811100  | -0.37563700 | 5.32003900  |
| H | 8.39863000  | -2.22127300 | 4.26984900  |
| C | 6.20585800  | 1.00699800  | -0.68182300 |
| C | 2.84186000  | 0.37101600  | 2.88969000  |
| H | 6.20208500  | 1.88576100  | -1.33183000 |
| H | 7.10347900  | 1.03695500  | -0.05652900 |
| H | 6.23919000  | 0.10889900  | -1.30809700 |
| H | 2.91897300  | 1.16866900  | 3.63928500  |
| H | 1.78798400  | 0.23064300  | 2.64623500  |
| H | 3.24071900  | -0.55364300 | 3.31863900  |
| C | 3.39356600  | -1.33723600 | -1.38965900 |



|   |             |             |             |
|---|-------------|-------------|-------------|
| C | 3.27064000  | -2.22851000 | -0.29464900 |
| C | 4.41391500  | -1.58341800 | -2.34725500 |
| C | 4.19390500  | -3.27224900 | -0.14391700 |
| C | 5.31207000  | -2.64061100 | -2.15634700 |
| C | 5.22963700  | -3.49141400 | -1.05105600 |
| H | 4.09750200  | -3.93132700 | 0.71810000  |
| H | 6.09542400  | -2.80562100 | -2.89421100 |
| C | 4.57256000  | -0.73381200 | -3.59208600 |
| C | 6.20804900  | -4.62563200 | -0.85366800 |
| C | 2.16233200  | -2.15718700 | 0.73136600  |
| H | 1.63663300  | -1.20581400 | 0.71998100  |
| H | 1.41724700  | -2.93127700 | 0.51525100  |
| H | 2.55045300  | -2.34182700 | 1.73930700  |
| H | 7.11521600  | -4.48329100 | -1.45072300 |
| H | 6.50329200  | -4.71783400 | 0.19859100  |
| H | 5.76823000  | -5.58733200 | -1.14904400 |
| H | 5.32812600  | -1.16511100 | -4.25821400 |
| H | 3.63052900  | -0.65694400 | -4.14515000 |
| H | 4.87316100  | 0.29302800  | -3.35647400 |
| C | -2.36577900 | 3.99501700  | -2.29131300 |
| C | -4.64035000 | 4.45611600  | -0.22099700 |
| C | -1.73202300 | 4.06697100  | 0.78118200  |
| H | -5.38803000 | 4.19622400  | -0.97923900 |
| H | -5.04410500 | 4.17485300  | 0.75886900  |

|   |             |            |             |
|---|-------------|------------|-------------|
| H | -4.51405900 | 5.54617100 | -0.23264500 |
| H | -1.50231200 | 3.38691900 | -2.57625600 |
| H | -3.15274700 | 3.81629000 | -3.03315600 |
| H | -2.07547100 | 5.05163100 | -2.35441400 |
| H | -1.37880200 | 5.09524000 | 0.63538700  |
| H | -2.18374000 | 4.00077100 | 1.77827000  |
| H | -0.86704700 | 3.39965100 | 0.76463400  |

### Fe-int3

125

|    |             |             |             |
|----|-------------|-------------|-------------|
| C  | -6.19183100 | 0.28210300  | 0.11113400  |
| N  | -5.03151500 | -0.58675800 | 0.12770000  |
| O  | 0.14044900  | -0.26245200 | -2.00844100 |
| C  | 6.10034900  | 0.81936200  | -0.36339300 |
| Si | -3.27320200 | -0.62560300 | -0.48365600 |
| C  | -4.92212900 | -1.83091900 | 0.60423900  |
| N  | 4.85076000  | 0.22140000  | -0.77984200 |
| Si | 2.86911300  | 0.58291100  | -1.04801600 |
| N  | -3.67904300 | -2.24875200 | 0.31126500  |
| C  | 0.85888200  | 0.22033500  | -1.19415000 |
| C  | 4.65117400  | -1.03192100 | -1.11900200 |
| C  | -3.00240600 | -3.42570300 | 0.82706800  |
| N  | 3.34901500  | -1.16269000 | -1.46801300 |
| C  | 2.61725600  | -2.39250500 | -1.70527400 |
| C  | -5.96415800 | -2.60161700 | 1.30296200  |
| C  | -6.20465200 | -3.93779300 | 0.94657000  |
| C  | -6.72066200 | -2.00278300 | 2.32177500  |
| C  | -7.19943900 | -4.66329200 | 1.59889200  |
| H  | -5.62435000 | -4.39484700 | 0.15099600  |

|    |             |             |             |
|----|-------------|-------------|-------------|
| C  | -7.70567600 | -2.73763000 | 2.97895700  |
| H  | -6.51939000 | -0.97643800 | 2.61112200  |
| C  | -7.94830900 | -4.06508400 | 2.61605400  |
| H  | -7.38968500 | -5.69397500 | 1.31481000  |
| H  | -8.28176000 | -2.27529300 | 3.77484600  |
| H  | -8.71978100 | -4.63402800 | 3.12692500  |
| C  | 5.65118600  | -2.12246000 | -1.09795600 |
| C  | 5.89288800  | -2.89840400 | -2.24059900 |
| C  | 6.36548300  | -2.37579400 | 0.08254200  |
| C  | 6.84514300  | -3.91670800 | -2.20300100 |
| H  | 5.34389100  | -2.69184100 | -3.15489300 |
| C  | 7.30853900  | -3.40237600 | 0.11703200  |
| H  | 6.16408400  | -1.78018500 | 0.96853700  |
| C  | 7.55129200  | -4.17134500 | -1.02423900 |
| H  | 7.03557000  | -4.51068000 | -3.09237700 |
| H  | 7.85383300  | -3.60148000 | 1.03532200  |
| H  | 8.28976900  | -4.96780600 | -0.99574500 |
| H  | -1.97468600 | -3.16320800 | 1.08380500  |
| H  | -3.50915700 | -3.79462600 | 1.72318100  |
| H  | -2.98058600 | -4.22765900 | 0.08000700  |
| H  | -6.11352800 | 0.95955100  | -0.74008300 |
| H  | -7.11504600 | -0.29996700 | 0.02556400  |
| H  | -6.23670700 | 0.89709000  | 1.01546600  |
| H  | 6.10156000  | 1.87304300  | -0.65409800 |
| H  | 6.21181400  | 0.77447700  | 0.72577300  |
| H  | 6.96217300  | 0.32583300  | -0.82833600 |
| H  | 3.29560700  | -3.24935600 | -1.72241100 |
| H  | 1.87411900  | -2.55759300 | -0.91904700 |
| H  | 2.08933000  | -2.34332300 | -2.66214500 |
| P  | -2.23859000 | 0.67073100  | 0.99079500  |
| P  | 2.45976200  | 1.48269900  | 0.97208000  |
| Fe | 0.10651200  | 0.89847600  | 1.08874500  |

|   |             |             |             |
|---|-------------|-------------|-------------|
| C | 0.06755400  | 1.20139200  | 2.82229700  |
| C | -0.02975300 | 2.56883300  | 0.43642600  |
| C | 0.18636100  | -0.85761800 | 0.98412100  |
| O | -0.12277700 | 3.66718900  | 0.07281100  |
| O | 0.09642300  | 1.36685200  | 3.97108900  |
| O | 0.14229100  | -2.02436000 | 0.87603500  |
| C | 3.76390900  | 0.87755100  | 2.15822100  |
| C | 3.98569100  | -0.47227400 | 2.53200600  |
| C | 4.64191700  | 1.86693800  | 2.67901500  |
| C | 5.07453800  | -0.80392000 | 3.34819100  |
| C | 5.71274100  | 1.49038000  | 3.50119100  |
| C | 5.95964600  | 0.15934500  | 3.83708300  |
| H | 5.22712800  | -1.84796000 | 3.61852400  |
| H | 6.37775600  | 2.26298200  | 3.88317700  |
| C | -3.20222100 | 2.18273500  | 0.41829500  |
| C | -4.10932600 | 2.73254600  | 1.36905300  |
| C | -3.14274600 | 2.76835600  | -0.87036700 |
| C | -4.94953300 | 3.78529500  | 1.00177800  |
| C | -4.02457600 | 3.81086600  | -1.19949400 |
| C | -4.93685500 | 4.33180300  | -0.28639600 |
| H | -5.64081200 | 4.18959800  | 1.73936300  |
| H | -3.97494300 | 4.23481900  | -2.20152900 |
| C | 3.06443300  | -1.58784400 | 2.11026600  |
| C | 7.15023300  | -0.23084900 | 4.68074500  |
| C | 4.49323300  | 3.34069700  | 2.35985300  |
| C | -4.20659700 | 2.20576600  | 2.78615000  |
| C | -2.14435200 | 2.37701000  | -1.93757800 |
| C | -5.85392700 | 5.47458200  | -0.65186700 |
| H | -4.89306300 | 2.82015500  | 3.37878600  |
| H | -4.56151800 | 1.16887400  | 2.81032500  |
| H | -3.23219100 | 2.20558900  | 3.28670800  |
| H | -5.96058900 | 5.57345100  | -1.73719500 |

|    |             |             |             |
|----|-------------|-------------|-------------|
| H  | -6.85304700 | 5.34040100  | -0.22125700 |
| H  | -5.46518500 | 6.42845000  | -0.27144500 |
| H  | -1.41686900 | 3.18276900  | -2.07625100 |
| H  | -1.57943200 | 1.47950500  | -1.69103500 |
| H  | -2.63932400 | 2.22450300  | -2.90273200 |
| H  | 2.09544500  | -1.49863300 | 2.61122100  |
| H  | 2.86259200  | -1.57235500 | 1.03883500  |
| H  | 3.48628100  | -2.56593600 | 2.36482100  |
| H  | 6.93022400  | -1.10264100 | 5.30712800  |
| H  | 8.01293000  | -0.49272900 | 4.05268700  |
| H  | 7.46366400  | 0.58860200  | 5.33651200  |
| H  | 5.21669000  | 3.93181900  | 2.93258900  |
| H  | 4.65690500  | 3.54037400  | 1.29452300  |
| H  | 3.48770400  | 3.70756100  | 2.58795700  |
| Si | -3.68911800 | -0.87467100 | -2.81981200 |
| Si | 3.07169200  | 2.06136300  | -2.87178000 |
| C  | 3.64257100  | 1.08226000  | -4.39913300 |
| C  | 4.32852300  | 3.43153300  | -2.48379600 |
| C  | 1.38472200  | 2.85905000  | -3.21885200 |
| C  | -4.44812600 | -2.60756000 | -2.99985600 |
| C  | -5.01182300 | 0.40797500  | -3.29301900 |
| C  | -2.21841100 | -0.70349500 | -3.99368200 |
| H  | 4.27730500  | 4.23284700  | -3.23199900 |
| H  | 4.12860200  | 3.87416400  | -1.50079800 |
| H  | 5.35313200  | 3.04294700  | -2.47915600 |
| H  | 4.59901700  | 0.58210600  | -4.20466500 |
| H  | 2.90976700  | 0.31017800  | -4.66197000 |
| H  | 3.77311000  | 1.73613500  | -5.27091600 |
| H  | 1.44726700  | 3.57827900  | -4.04523600 |
| H  | 0.63739600  | 2.10116400  | -3.47857700 |
| H  | 1.02150600  | 3.38900200  | -2.33101500 |
| H  | -5.31655100 | -2.72852400 | -2.34200700 |

|   |             |             |             |
|---|-------------|-------------|-------------|
| H | -4.78157800 | -2.77412000 | -4.03206500 |
| H | -3.72230100 | -3.38832700 | -2.74759100 |
| H | -5.99759500 | 0.09718100  | -2.92953800 |
| H | -4.80363200 | 1.40485600  | -2.89106400 |
| H | -5.07207600 | 0.49014800  | -4.38556600 |
| H | -1.46024200 | -1.47325800 | -3.83290400 |
| H | -2.58843600 | -0.79598800 | -5.02342500 |
| H | -1.72178600 | 0.26388100  | -3.89047000 |
| C | -1.05261500 | -3.01798900 | -1.67805800 |
| O | -0.24380600 | -3.64257500 | -2.17721600 |

### Fe-ts1

125

|    |             |             |             |
|----|-------------|-------------|-------------|
| C  | -1.76260300 | -1.95767600 | 2.60308700  |
| N  | -2.53994200 | -1.61646800 | 1.42182500  |
| O  | 0.57021500  | -1.31114500 | -2.55738300 |
| C  | 5.63841900  | 0.95942900  | 0.24140200  |
| Si | -2.18921700 | -1.40051000 | -0.38525100 |
| C  | -3.89182400 | -1.63455000 | 1.30723400  |
| N  | 4.65697600  | -0.02257600 | -0.16518300 |
| Si | 2.91914900  | -0.17748000 | -1.11007500 |
| N  | -4.19459700 | -1.48212100 | 0.03925900  |
| C  | 0.99609900  | -0.78166400 | -1.57516300 |
| C  | 4.58460600  | -1.29519500 | 0.18662000  |
| C  | -5.51695900 | -1.32781900 | -0.52590700 |
| N  | 3.41669700  | -1.76673400 | -0.29122400 |
| C  | 2.97111700  | -3.14517200 | -0.35179700 |
| H  | -5.90651300 | -2.28875300 | -0.88816000 |
| H  | -6.22529900 | -0.91838100 | 0.20279300  |
| H  | -5.46172600 | -0.63953000 | -1.37115300 |
| H  | -1.14113500 | -1.11072400 | 2.90910600  |
| H  | -2.42617700 | -2.22638300 | 3.42869900  |

|    |             |             |             |
|----|-------------|-------------|-------------|
| H  | -1.10082300 | -2.80285300 | 2.39492100  |
| H  | 6.43632700  | 1.06107900  | -0.50577300 |
| H  | 5.14318900  | 1.92708500  | 0.34915200  |
| H  | 6.09452900  | 0.69486400  | 1.20183800  |
| H  | 2.33314300  | -3.39706700 | 0.50199100  |
| H  | 2.38079300  | -3.28888300 | -1.26029400 |
| H  | 3.82315500  | -3.83191300 | -0.37867100 |
| P  | -2.19092800 | 0.55863300  | -1.50284500 |
| P  | 2.10310000  | 1.84404800  | -0.44018200 |
| Fe | -0.16838500 | 1.54933200  | -0.75532400 |
| C  | -0.82288300 | 3.15866100  | -0.65649000 |
| C  | 0.12707200  | 1.70586700  | -2.54572800 |
| C  | -0.27199900 | 1.31966300  | 1.01299500  |
| O  | 0.28543000  | 1.89352600  | -3.67036700 |
| O  | -1.25668900 | 4.22770300  | -0.56538600 |
| O  | -0.31624000 | 1.21970600  | 2.16348700  |
| Si | -2.25791700 | -3.46101900 | -1.53309500 |
| Si | 3.91793700  | -0.09708600 | -3.25845300 |
| C  | 5.26619700  | -1.44020000 | -3.26997900 |
| C  | 4.71981800  | 1.60772300  | -3.47653400 |
| C  | 2.72897800  | -0.42482100 | -4.69470200 |
| C  | -0.55080000 | -4.29084500 | -1.59369300 |
| C  | -3.46073200 | -4.62714700 | -0.62928800 |
| C  | -2.88204200 | -3.12703600 | -3.29187100 |
| H  | 5.22569200  | 1.68305700  | -4.44766800 |
| H  | 3.96388000  | 2.39876000  | -3.41985700 |
| H  | 5.45930800  | 1.80309600  | -2.69157700 |
| H  | 5.98694200  | -1.28704300 | -2.45881600 |
| H  | 4.83182200  | -2.43918500 | -3.14651700 |
| H  | 5.81725500  | -1.42850400 | -4.21878800 |
| H  | 3.27544900  | -0.39502000 | -5.64637800 |
| H  | 2.25230800  | -1.40522000 | -4.59825700 |

|   |             |             |             |
|---|-------------|-------------|-------------|
| H | 1.93184800  | 0.32383100  | -4.73670100 |
| H | -0.09718700 | -4.33868000 | -0.59651900 |
| H | -0.62898200 | -5.31475300 | -1.98031100 |
| H | 0.12655000  | -3.72881100 | -2.24365700 |
| H | -3.20707400 | -4.71119500 | 0.43440600  |
| H | -4.49035000 | -4.25936900 | -0.69796900 |
| H | -3.43033800 | -5.63481200 | -1.06281000 |
| H | -2.20934900 | -2.43138100 | -3.80594500 |
| H | -2.94204000 | -4.05018200 | -3.88204100 |
| H | -3.87954100 | -2.67141300 | -3.27192700 |
| C | -0.18843400 | -1.15778100 | -0.08659100 |
| O | 0.52275900  | -1.60357000 | 0.76354500  |
| C | 2.61164200  | 2.44175100  | 1.24302200  |
| C | 2.77723600  | 3.85690800  | 1.33202400  |
| C | 2.85279800  | 1.66459400  | 2.40014800  |
| C | 3.19795500  | 4.43399500  | 2.53094800  |
| C | 3.28561300  | 2.29327800  | 3.57792900  |
| C | 3.47192500  | 3.66888100  | 3.66937700  |
| H | 3.31737900  | 5.51499800  | 2.57910000  |
| H | 3.46847500  | 1.67460200  | 4.45559600  |
| C | -3.78510600 | 1.46142500  | -1.20121500 |
| C | -4.60447500 | 1.67225900  | -2.34464000 |
| C | -4.24519000 | 1.93431400  | 0.05301700  |
| C | -5.84733600 | 2.29999700  | -2.20360800 |
| C | -5.49905400 | 2.55069800  | 0.14559200  |
| C | -6.32168900 | 2.73707300  | -0.96556800 |
| H | -6.46444100 | 2.44842300  | -3.08790800 |
| H | -5.83932000 | 2.90032100  | 1.11889800  |
| C | -3.42418100 | 1.84418700  | 1.31596700  |
| C | -4.19645100 | 1.22140100  | -3.73319000 |
| C | -7.68732500 | 3.36762500  | -0.83044900 |
| C | 2.66958300  | 0.16778000  | 2.47552500  |



|   |             |             |             |
|---|-------------|-------------|-------------|
| C | 2.49993800  | 4.77837100  | 0.16214000  |
| C | 3.95915400  | 4.32054800  | 4.94163800  |
| H | -7.97380300 | 3.90353200  | -1.74193200 |
| H | -8.45762000 | 2.60642800  | -0.64566800 |
| H | -7.72257000 | 4.07430800  | 0.00579900  |
| H | -2.65893200 | 2.62885600  | 1.33803900  |
| H | -4.05528500 | 1.98194400  | 2.20018300  |
| H | -2.90372200 | 0.89188000  | 1.41139800  |
| H | -3.22629600 | 1.63502400  | -4.02733900 |
| H | -4.09431900 | 0.13170500  | -3.79362800 |
| H | -4.94241000 | 1.53459700  | -4.47181700 |
| H | 3.09546300  | 4.50773400  | -0.71663800 |
| H | 1.45036900  | 4.73663200  | -0.15037500 |
| H | 2.72512500  | 5.81643100  | 0.42859100  |
| H | 5.00725100  | 4.63574500  | 4.85022700  |
| H | 3.37540600  | 5.21742200  | 5.18041600  |
| H | 3.89380000  | 3.63667400  | 5.79438700  |
| H | 3.63867200  | -0.34301400 | 2.52442600  |
| H | 2.11895700  | -0.10075800 | 3.38438100  |
| H | 2.12023700  | -0.23819700 | 1.62996500  |
| C | -4.84216900 | -1.76114800 | 2.43389300  |
| C | -5.87155600 | -2.71159000 | 2.38026300  |
| C | -4.73709700 | -0.91246000 | 3.54635500  |
| C | -6.78179000 | -2.81598500 | 3.43135800  |
| H | -5.94537000 | -3.37225100 | 1.52174300  |
| C | -5.65628800 | -1.01285500 | 4.58975600  |
| H | -3.94759100 | -0.16825300 | 3.57954900  |
| C | -6.67707800 | -1.96563400 | 4.53508400  |
| H | -7.57262000 | -3.55933000 | 3.38816200  |
| H | -5.57600100 | -0.34718100 | 5.44429300  |
| H | -7.39032800 | -2.04447600 | 5.35073700  |
| C | 5.56716000  | -2.06536900 | 0.97108100  |

|   |            |             |             |
|---|------------|-------------|-------------|
| C | 5.13313600 | -2.89619200 | 2.01627600  |
| C | 6.93801000 | -1.96417500 | 0.68918500  |
| C | 6.06102800 | -3.61105200 | 2.77147200  |
| H | 4.07394000 | -2.96263000 | 2.24359700  |
| C | 7.86097800 | -2.69115000 | 1.43913000  |
| H | 7.27391700 | -1.33030800 | -0.12541300 |
| C | 7.42461100 | -3.51226400 | 2.48221300  |
| H | 5.72020900 | -4.24453900 | 3.58520700  |
| H | 8.92001200 | -2.61615800 | 1.21019800  |
| H | 8.14606200 | -4.07375100 | 3.06897800  |

#### Fe-int4

125

|    |             |             |             |
|----|-------------|-------------|-------------|
| C  | 2.45253300  | -3.15383400 | -1.28010400 |
| N  | 3.19721800  | -2.18864400 | -0.46518700 |
| O  | 0.14963200  | 0.07509600  | 2.42576100  |
| C  | -5.92514900 | 0.28691500  | 0.61745600  |
| Si | 2.51743000  | -0.96644400 | 0.66327500  |
| C  | 4.48732500  | -1.81544300 | -0.78452400 |
| N  | -4.61045600 | -0.31279500 | 0.64263900  |
| Si | -2.23184700 | -0.38102400 | 1.23368300  |
| N  | 4.85484900  | -0.68388300 | -0.27672300 |
| C  | -0.32702700 | -0.72886700 | 1.62029500  |
| C  | -4.36333100 | -1.56517200 | 0.44654200  |
| C  | 6.22691200  | -0.21724600 | -0.27025700 |
| N  | -3.03738700 | -1.89467900 | 0.65688900  |
| C  | -2.46152900 | -3.15988700 | 0.20387400  |
| C  | 5.34116200  | -2.72475500 | -1.60514200 |
| C  | 5.77637900  | -2.32748400 | -2.87544400 |
| C  | 5.73373200  | -3.96980400 | -1.09497100 |
| C  | 6.59391400  | -3.16973800 | -3.63050900 |

|    |             |             |             |
|----|-------------|-------------|-------------|
| H  | 5.46991100  | -1.36147700 | -3.26766000 |
| C  | 6.55651700  | -4.80650100 | -1.84881600 |
| H  | 5.39443800  | -4.27226000 | -0.10808500 |
| C  | 6.98555500  | -4.40871400 | -3.11809800 |
| H  | 6.92462400  | -2.85831900 | -4.61737800 |
| H  | 6.86153000  | -5.76858100 | -1.44671400 |
| H  | 7.62368000  | -5.06280200 | -3.70574200 |
| C  | -5.36184300 | -2.60585800 | 0.06557000  |
| C  | -5.64839400 | -3.66888300 | 0.93349000  |
| C  | -6.05353300 | -2.50083100 | -1.14835600 |
| C  | -6.60702000 | -4.62003400 | 0.58518800  |
| H  | -5.12557900 | -3.73818800 | 1.88339200  |
| C  | -7.00714900 | -3.45774600 | -1.49803000 |
| H  | -5.84562800 | -1.66387700 | -1.80813900 |
| C  | -7.28368000 | -4.51929900 | -0.63353800 |
| H  | -6.82670200 | -5.43865000 | 1.26491300  |
| H  | -7.53578700 | -3.37194300 | -2.44336400 |
| H  | -8.02748500 | -5.26312100 | -0.90555400 |
| H  | 6.65899900  | -0.35672500 | 0.73004500  |
| H  | 6.87732900  | -0.72356700 | -0.99430100 |
| H  | 6.23714800  | 0.85802800  | -0.47561900 |
| H  | 2.10221200  | -2.70541600 | -2.21820700 |
| H  | 3.08170000  | -4.01389200 | -1.52046600 |
| H  | 1.59174500  | -3.50671800 | -0.71548900 |
| H  | -6.13370700 | 0.74557100  | 1.59242700  |
| H  | -5.93954200 | 1.08638500  | -0.13131800 |
| H  | -6.73429800 | -0.41995900 | 0.39394600  |
| H  | -2.34916800 | -3.18816600 | -0.88741800 |
| H  | -1.47898100 | -3.28505800 | 0.65575900  |
| H  | -3.08605800 | -4.00435300 | 0.50650600  |
| P  | 1.97261400  | 0.94519700  | -0.44750900 |
| P  | -1.84154800 | 1.44875300  | -0.10698600 |
| Fe | 0.11642900  | 1.25768900  | -1.42613600 |
| C  | -0.50051600 | 1.54915900  | -3.05885100 |

|   |             |             |             |
|---|-------------|-------------|-------------|
| C | 0.26393100  | 3.02837900  | -1.09819600 |
| C | -0.17063300 | -0.49316700 | -1.54069800 |
| O | 0.32222700  | 4.15275900  | -0.86217000 |
| O | -0.80494200 | 1.75297000  | -4.15410800 |
| O | -0.35073800 | -1.62817700 | -1.66176500 |
| C | -3.31694600 | 1.79138300  | -1.18524500 |
| C | -3.84472000 | 0.91960400  | -2.17193200 |
| C | -3.93592100 | 3.05453700  | -0.99686200 |
| C | -4.98225900 | 1.29791700  | -2.89230200 |
| C | -5.07139600 | 3.39061700  | -1.74622500 |
| C | -5.62107300 | 2.52365400  | -2.69017200 |
| H | -5.37799000 | 0.61426000  | -3.64186300 |
| H | -5.53878900 | 4.35975700  | -1.58286000 |
| C | 3.07772500  | 2.33010000  | 0.02555300  |
| C | 4.12174900  | 2.68891000  | -0.85912600 |
| C | 2.87252400  | 3.06527600  | 1.21446800  |
| C | 4.98707500  | 3.72588500  | -0.49597200 |
| C | 3.75917100  | 4.10043300  | 1.52771300  |
| C | 4.83308100  | 4.43417500  | 0.69913100  |
| H | 5.79608100  | 3.99516600  | -1.17234300 |
| H | 3.60349900  | 4.66184400  | 2.44675000  |
| C | -3.21887700 | -0.40880600 | -2.52059200 |
| C | -6.87325200 | 2.88345700  | -3.45341700 |
| C | -3.41579700 | 4.07934400  | -0.00830600 |
| C | 4.29819300  | 2.01722200  | -2.20271600 |
| C | 1.71327400  | 2.77824300  | 2.13733600  |
| C | 5.80608700  | 5.52116100  | 1.08888300  |
| H | 5.20961700  | 2.36772900  | -2.69766600 |
| H | 4.35347100  | 0.92867800  | -2.10423500 |
| H | 3.44980200  | 2.23538000  | -2.86353900 |
| H | 5.32302300  | 6.29248700  | 1.69818900  |
| H | 6.63558400  | 5.11119300  | 1.68063100  |
| H | 6.24257300  | 6.00478800  | 0.20840500  |
| H | 0.75040700  | 2.94975800  | 1.64178400  |

|    |             |             |             |
|----|-------------|-------------|-------------|
| H  | 1.69606600  | 1.73804800  | 2.47020700  |
| H  | 1.75216700  | 3.41865800  | 3.02415900  |
| H  | -2.36246300 | -0.27680800 | -3.19103700 |
| H  | -2.86348100 | -0.94343500 | -1.64251600 |
| H  | -3.93262900 | -1.05264000 | -3.04399900 |
| H  | -6.84084200 | 2.50193700  | -4.48011800 |
| H  | -7.76346500 | 2.45204400  | -2.97596200 |
| H  | -7.01979800 | 3.96780500  | -3.49718400 |
| H  | -3.98674900 | 5.01062800  | -0.08770100 |
| H  | -3.49097200 | 3.72376700  | 1.02406200  |
| H  | -2.36021700 | 4.31270000  | -0.18182400 |
| Si | 3.70598700  | -0.95085400 | 2.71128600  |
| Si | -3.06609400 | 0.20326200  | 3.37614000  |
| C  | -4.43251600 | -1.03840000 | 3.83752700  |
| C  | -3.75649600 | 1.96743400  | 3.32625400  |
| C  | -1.75878800 | 0.10934400  | 4.74909000  |
| C  | 2.50947100  | -1.26892000 | 4.14403300  |
| C  | 4.90333800  | -2.42187600 | 2.60752000  |
| C  | 4.64851300  | 0.66399200  | 3.00040700  |
| H  | -4.25326100 | 2.22540500  | 4.27018000  |
| H  | -2.94331800 | 2.68375400  | 3.16258700  |
| H  | -4.47879800 | 2.09029600  | 2.51308000  |
| H  | -5.31006800 | -0.94943600 | 3.19130500  |
| H  | -4.06138400 | -2.06753100 | 3.75942800  |
| H  | -4.75121800 | -0.87746500 | 4.87531900  |
| H  | -2.23350600 | 0.27745400  | 5.72493500  |
| H  | -1.26884500 | -0.87060100 | 4.77493200  |
| H  | -0.97817100 | 0.86066800  | 4.60240700  |
| H  | 1.95067500  | -2.19920800 | 3.98815600  |
| H  | 3.06394200  | -1.36059100 | 5.08678000  |
| H  | 1.78106100  | -0.45933100 | 4.24113100  |
| H  | 4.36299900  | -3.34728600 | 2.37749400  |
| H  | 5.66734900  | -2.27548500 | 1.83856100  |
| H  | 5.40912500  | -2.55849700 | 3.57185500  |

|   |            |             |            |
|---|------------|-------------|------------|
| H | 3.97736500 | 1.45961000  | 3.33706800 |
| H | 5.40895000 | 0.51352200  | 3.77749800 |
| H | 5.14548600 | 1.01406700  | 2.09194300 |
| C | 0.74888400 | -1.71917200 | 1.12199900 |
| O | 0.57904000 | -2.92246400 | 1.28368100 |

## Fe-ts2

125

|    |             |             |             |
|----|-------------|-------------|-------------|
| C  | -4.14458700 | 1.32082000  | -2.87709800 |
| N  | -3.77504500 | 1.40764600  | -1.48032100 |
| O  | -0.75893500 | 1.18208000  | 0.90529600  |
| C  | 5.41161800  | -0.21702100 | 1.81974800  |
| Si | -2.18758700 | 1.41523600  | -0.45386900 |
| C  | -4.51077400 | 1.13245700  | -0.39583200 |
| N  | 4.29330000  | 0.42961100  | 1.17135000  |
| Si | 1.93902000  | 0.84225600  | 0.73937000  |
| N  | -3.65915000 | 1.05460200  | 0.63522500  |
| C  | 0.21209500  | 1.54568200  | 0.14842100  |
| C  | 4.39114800  | 1.42388100  | 0.35097400  |
| C  | -3.96853800 | 1.06232200  | 2.05015700  |
| N  | 3.16495700  | 1.87422800  | -0.08855800 |
| C  | 3.02499900  | 2.91496700  | -1.10424300 |
| H  | -4.88597600 | 1.62399100  | 2.25323200  |
| H  | -4.08247000 | 0.04327800  | 2.43399500  |
| H  | -3.14006300 | 1.53780500  | 2.58161400  |
| H  | -3.43395200 | 0.67129600  | -3.40023200 |
| H  | -5.15031000 | 0.90772900  | -2.99737800 |
| H  | -4.11251400 | 2.30997000  | -3.34657800 |
| H  | 5.22698100  | -0.26057100 | 2.89988000  |
| H  | 5.49924800  | -1.24751000 | 1.45810600  |
| H  | 6.36962000  | 0.29336700  | 1.65821300  |
| H  | 2.01482300  | 2.90069500  | -1.51160400 |

|    |             |             |             |
|----|-------------|-------------|-------------|
| H  | 3.21601500  | 3.91370800  | -0.69222300 |
| H  | 3.72639000  | 2.74751200  | -1.92910300 |
| P  | -1.82159800 | -0.98217300 | -0.84713800 |
| P  | 1.62466100  | -1.39289700 | 0.28700000  |
| Fe | 0.05213700  | -1.84277200 | -1.39578100 |
| C  | 0.99050700  | -2.88049700 | -2.48228500 |
| C  | -0.41449700 | -3.28291900 | -0.43694700 |
| C  | 0.56544400  | -0.45046500 | -2.41566400 |
| O  | -0.66566900 | -4.22160200 | 0.18301600  |
| O  | 1.56242000  | -3.58858100 | -3.19564600 |
| O  | 0.96664800  | 0.27927000  | -3.21300300 |
| Si | -2.36263900 | 3.88520200  | -0.16939400 |
| Si | 1.87645300  | 1.25212000  | 3.07441400  |
| C  | 3.17471100  | 2.58287800  | 3.47158200  |
| C  | 2.25523800  | -0.36175500 | 3.99152000  |
| C  | 0.19802400  | 1.87940800  | 3.70689800  |
| C  | -0.85485400 | 4.71566400  | 0.64075300  |
| C  | -2.61637400 | 4.63663600  | -1.89346600 |
| C  | -3.88948700 | 4.29529100  | 0.89377600  |
| H  | 2.32006700  | -0.19217000 | 5.07389400  |
| H  | 1.45916500  | -1.09150200 | 3.80586100  |
| H  | 3.19650500  | -0.80552500 | 3.65458400  |
| H  | 4.18331000  | 2.24474500  | 3.21565200  |
| H  | 2.97481200  | 3.50252900  | 2.90824700  |
| H  | 3.15422400  | 2.83426800  | 4.53962600  |
| H  | 0.26339700  | 2.08231300  | 4.78402000  |
| H  | -0.10856400 | 2.80395300  | 3.20671200  |
| H  | -0.58832500 | 1.13674000  | 3.54141000  |
| H  | 0.04335900  | 4.56531800  | 0.03136000  |
| H  | -1.01762300 | 5.79653900  | 0.74299400  |
| H  | -0.66079200 | 4.31087300  | 1.64029100  |
| H  | -1.85728600 | 4.27092100  | -2.59277300 |

|   |             |             |             |
|---|-------------|-------------|-------------|
| H | -3.60544900 | 4.37931000  | -2.28981800 |
| H | -2.54368100 | 5.73135000  | -1.85568600 |
| H | -3.75720600 | 3.97276500  | 1.93226000  |
| H | -4.05704600 | 5.38051100  | 0.89928200  |
| H | -4.79758700 | 3.81895300  | 0.50657400  |
| C | -0.43299400 | 1.98088900  | -1.17633000 |
| O | -0.00403700 | 2.66675400  | -2.08803200 |
| C | -5.97051300 | 0.95980700  | -0.33024900 |
| C | -6.51132100 | -0.08072600 | 0.44099600  |
| C | -6.82287200 | 1.82550200  | -1.03337400 |
| C | -7.89235700 | -0.25621800 | 0.49733600  |
| H | -5.85131000 | -0.76396700 | 0.96305300  |
| C | -8.20402300 | 1.65121700  | -0.96293300 |
| H | -6.40140100 | 2.64033800  | -1.61433100 |
| C | -8.73935900 | 0.60882000  | -0.20099900 |
| H | -8.30591400 | -1.07139000 | 1.08413300  |
| H | -8.86157000 | 2.32817900  | -1.50039000 |
| H | -9.81593400 | 0.47165700  | -0.15170800 |
| C | 5.65595100  | 2.05376600  | -0.12474900 |
| C | 6.59054100  | 1.28200400  | -0.82930800 |
| C | 5.93534700  | 3.39956700  | 0.14803800  |
| C | 7.78309400  | 1.85655300  | -1.27005300 |
| H | 6.37708600  | 0.23464100  | -1.02237400 |
| C | 7.13277700  | 3.96839800  | -0.28524500 |
| H | 5.21885900  | 3.99325400  | 0.70840300  |
| C | 8.05542600  | 3.19975900  | -0.99995800 |
| H | 8.50024900  | 1.25439500  | -1.82102500 |
| H | 7.34531900  | 5.01104300  | -0.06585300 |
| H | 8.98543000  | 3.64578400  | -1.34159200 |
| C | 3.26593300  | -2.18259500 | -0.09072200 |
| C | 3.64683200  | -3.24659600 | 0.76861800  |
| C | 4.13472600  | -1.82923500 | -1.15416900 |



|   |             |             |             |
|---|-------------|-------------|-------------|
| C | 4.87953000  | -3.88622900 | 0.58057300  |
| C | 5.36221000  | -2.48603400 | -1.29268200 |
| C | 5.75994500  | -3.51499000 | -0.43531200 |
| H | 5.16062300  | -4.69237700 | 1.25561000  |
| H | 6.02331800  | -2.19329300 | -2.10735000 |
| C | -3.05867400 | -1.98580500 | 0.08100200  |
| C | -4.15054000 | -2.55863100 | -0.61453500 |
| C | -2.94832700 | -2.17879400 | 1.48068100  |
| C | -5.11575100 | -3.27925100 | 0.09588800  |
| C | -3.94643400 | -2.89619100 | 2.15050000  |
| C | -5.03917300 | -3.45333500 | 1.48036400  |
| H | -5.95652600 | -3.70738200 | -0.44660800 |
| H | -3.85963500 | -3.03220300 | 3.22705600  |
| C | -4.30463500 | -2.41172200 | -2.11171000 |
| C | -6.08725900 | -4.24716700 | 2.22367400  |
| C | -1.77020800 | -1.65284000 | 2.26471100  |
| C | 2.76733700  | -3.73216000 | 1.90373100  |
| C | 7.08001300  | -4.22177400 | -0.63004300 |
| C | 3.78571300  | -0.79388200 | -2.19611200 |
| H | -4.39767400 | -1.36116400 | -2.40584800 |
| H | -3.43415000 | -2.81075100 | -2.64495300 |
| H | -5.19593300 | -2.93837800 | -2.46719900 |
| H | -7.06820000 | -4.16607300 | 1.74228700  |
| H | -5.82773100 | -5.31380600 | 2.25277500  |
| H | -6.18627200 | -3.90909900 | 3.26088300  |
| H | -1.92721300 | -1.78072000 | 3.34078100  |
| H | -0.84324800 | -2.17292200 | 1.99620000  |
| H | -1.58124100 | -0.59566000 | 2.06440900  |
| H | 1.76972900  | -4.01613000 | 1.55250100  |
| H | 3.21668600  | -4.60550700 | 2.38876300  |
| H | 2.62108800  | -2.95805800 | 2.66374100  |
| H | 7.86352100  | -3.52519300 | -0.94949500 |

|   |            |             |             |
|---|------------|-------------|-------------|
| H | 7.41386700 | -4.71117900 | 0.29100300  |
| H | 7.00260400 | -4.99722800 | -1.40388900 |
| H | 3.15708600 | -1.23479200 | -2.97763300 |
| H | 3.24229800 | 0.05456100  | -1.78416500 |
| H | 4.68664500 | -0.41171000 | -2.68695700 |

### Fe-int5

125

|    |             |             |             |
|----|-------------|-------------|-------------|
| C  | -2.00464900 | 3.42410900  | 0.92317700  |
| N  | -2.73321500 | 2.27012500  | 0.38535800  |
| O  | -1.12510600 | 0.53130900  | 1.86918400  |
| C  | 5.47099300  | -1.28979100 | 1.10928600  |
| Si | -2.56294500 | 0.58967800  | 0.96712600  |
| C  | -3.89738700 | 2.43849200  | -0.34953500 |
| N  | 4.26133600  | -0.49867800 | 1.10132200  |
| Si | 1.72908700  | 0.06383400  | 1.27125500  |
| N  | -4.71812400 | 1.44252100  | -0.30907400 |
| C  | 0.15448600  | 1.10002400  | 1.71652300  |
| C  | 4.24373800  | 0.78753000  | 1.06105900  |
| C  | -5.92236700 | 1.38484600  | -1.11719200 |
| N  | 2.98122100  | 1.36098100  | 1.12850100  |
| C  | 2.78402100  | 2.76334000  | 0.74292900  |
| C  | -4.05192800 | 3.67997100  | -1.16441500 |
| C  | -3.03238800 | 4.05384400  | -2.05355800 |
| C  | -5.20980200 | 4.46359800  | -1.07510500 |
| C  | -3.17892200 | 5.18750500  | -2.85118000 |
| H  | -2.12960600 | 3.45326200  | -2.11034600 |
| C  | -5.34815900 | 5.60578600  | -1.86455400 |
| H  | -5.99454900 | 4.18252200  | -0.37908600 |
| C  | -4.33575900 | 5.96644500  | -2.75667600 |

|    |             |             |             |
|----|-------------|-------------|-------------|
| H  | -2.38903500 | 5.46577900  | -3.54328800 |
| H  | -6.24540400 | 6.21287900  | -1.78276900 |
| H  | -4.44632700 | 6.85330600  | -3.37457000 |
| C  | 5.43637500  | 1.68091800  | 0.95604000  |
| C  | 5.72137700  | 2.60320500  | 1.97203900  |
| C  | 6.28485500  | 1.59182000  | -0.15582700 |
| C  | 6.84439200  | 3.42468100  | 1.87832300  |
| H  | 5.06282600  | 2.66796300  | 2.83386000  |
| C  | 7.40187300  | 2.42299900  | -0.25227400 |
| H  | 6.06061200  | 0.87270200  | -0.93871400 |
| C  | 7.68395300  | 3.33887400  | 0.76400000  |
| H  | 7.06344500  | 4.13285800  | 2.67271900  |
| H  | 8.05241900  | 2.35326600  | -1.11985600 |
| H  | 8.55559000  | 3.98335600  | 0.68933600  |
| H  | -6.78001700 | 1.77895700  | -0.55499900 |
| H  | -5.85622700 | 1.93994200  | -2.06275400 |
| H  | -6.14706000 | 0.33881000  | -1.34387600 |
| H  | -2.56453000 | 4.34168500  | 0.73325500  |
| H  | -1.88842200 | 3.33017200  | 2.00705100  |
| H  | -1.01525200 | 3.52155600  | 0.47005800  |
| H  | 5.43325600  | -1.99761800 | 1.94677000  |
| H  | 5.52069200  | -1.87881900 | 0.18540800  |
| H  | 6.39575200  | -0.70478300 | 1.19925200  |
| H  | 3.50074700  | 3.05913500  | -0.02700600 |
| H  | 1.78205200  | 2.88966100  | 0.32905100  |
| H  | 2.89287800  | 3.44233600  | 1.59498100  |
| P  | -2.21777300 | -0.70360700 | -0.86423500 |
| P  | 1.40789300  | -1.26894400 | -0.56251400 |
| Fe | -0.36571000 | -0.61971800 | -1.93046800 |
| C  | 0.42840500  | -0.39895800 | -3.50006100 |
| C  | -0.52024000 | -2.40599600 | -2.18401100 |
| C  | -0.15472500 | 1.10808800  | -1.54319400 |

|   |             |             |             |
|---|-------------|-------------|-------------|
| O | -0.59923600 | -3.54558400 | -2.32036200 |
| O | 0.86806100  | -0.26171500 | -4.55950000 |
| O | 0.01992500  | 2.24087500  | -1.40065700 |
| C | 2.98929300  | -1.39451000 | -1.53568600 |
| C | 3.64123200  | -0.33153000 | -2.20341300 |
| C | 3.53905800  | -2.70132700 | -1.64452200 |
| C | 4.82210200  | -0.57827400 | -2.91606200 |
| C | 4.71789000  | -2.89965200 | -2.37143500 |
| C | 5.38591000  | -1.85035800 | -3.00697900 |
| H | 5.30892900  | 0.25487400  | -3.42150100 |
| H | 5.12795200  | -3.90549200 | -2.44073200 |
| C | -3.08099700 | -2.29520300 | -0.52635600 |
| C | -4.19355200 | -2.64417900 | -1.32335600 |
| C | -2.65729900 | -3.16341500 | 0.50894800  |
| C | -4.90792400 | -3.80906400 | -1.02460600 |
| C | -3.40418500 | -4.31609200 | 0.77048300  |
| C | -4.54261800 | -4.64861300 | 0.02980400  |
| H | -5.77164500 | -4.06679700 | -1.63437700 |
| H | -3.08155700 | -4.97752800 | 1.57210900  |
| C | 3.12046000  | 1.08493700  | -2.22213000 |
| C | 6.68284000  | -2.08320800 | -3.74430200 |
| C | 2.89958500  | -3.91051300 | -0.99322400 |
| C | -4.59933100 | -1.82225600 | -2.52585100 |
| C | -1.39687500 | -2.91026000 | 1.30192500  |
| C | -5.35897500 | -5.87209900 | 0.37117900  |
| H | -5.61351500 | -2.07283700 | -2.85317700 |
| H | -4.55309600 | -0.74923800 | -2.32453400 |
| H | -3.92031900 | -2.01040300 | -3.36832300 |
| H | -4.73009800 | -6.67579100 | 0.76923100  |
| H | -6.11177800 | -5.63917300 | 1.13610600  |
| H | -5.89210100 | -6.25693300 | -0.50458400 |
| H | -0.50797300 | -2.97844900 | 0.66330400  |

|    |             |             |             |
|----|-------------|-------------|-------------|
| H  | -1.36959300 | -1.91335700 | 1.74909900  |
| H  | -1.28941800 | -3.64176200 | 2.10913400  |
| H  | 2.57928100  | 1.29004700  | -3.15385700 |
| H  | 2.44282400  | 1.28060300  | -1.39772400 |
| H  | 3.94439400  | 1.80436600  | -2.16132100 |
| H  | 6.84076600  | -1.33322000 | -4.52676600 |
| H  | 7.54052000  | -2.02767600 | -3.06021900 |
| H  | 6.70632100  | -3.07377900 | -4.21164900 |
| H  | 3.44478400  | -4.82218700 | -1.26018400 |
| H  | 2.89534800  | -3.82599100 | 0.09802500  |
| H  | 1.85640900  | -4.03542800 | -1.30112200 |
| Si | -4.18412600 | -0.10570400 | 2.52999400  |
| Si | 2.04448500  | -1.22087400 | 3.22790200  |
| C  | 3.36186100  | -0.34810900 | 4.28594400  |
| C  | 2.53913300  | -3.01240500 | 2.86416000  |
| C  | 0.44494900  | -1.24573200 | 4.25324600  |
| C  | -3.37306700 | -1.11230300 | 3.91604800  |
| C  | -4.85225800 | 1.52633800  | 3.23570500  |
| C  | -5.58854500 | -1.12278300 | 1.77905200  |
| H  | 2.69318300  | -3.57192100 | 3.79565500  |
| H  | 1.75121400  | -3.51637000 | 2.29285000  |
| H  | 3.46134400  | -3.05973600 | 2.27825200  |
| H  | 4.34328800  | -0.36726100 | 3.80348300  |
| H  | 3.08937800  | 0.70084900  | 4.45505800  |
| H  | 3.44595000  | -0.83292200 | 5.26697300  |
| H  | 0.63762200  | -1.67938800 | 5.24321800  |
| H  | 0.05110500  | -0.23337400 | 4.39495900  |
| H  | -0.33904700 | -1.83688000 | 3.77234100  |
| H  | -2.47924000 | -0.61689800 | 4.30712400  |
| H  | -4.07943200 | -1.25604000 | 4.74382800  |
| H  | -3.07536700 | -2.10266500 | 3.55476300  |
| H  | -4.06229000 | 2.10384700  | 3.73057900  |

|   |             |             |            |
|---|-------------|-------------|------------|
| H | -5.27467000 | 2.14232400  | 2.43469200 |
| H | -5.64050800 | 1.33547300  | 3.97493300 |
| H | -5.22325900 | -2.07368400 | 1.37962300 |
| H | -6.33652700 | -1.34244700 | 2.55233000 |
| H | -6.07914700 | -0.57745100 | 0.96886100 |
| C | 0.40574000  | 2.18313300  | 2.43649100 |
| O | 0.68608300  | 3.17234800  | 3.01467600 |

### Fe-ts3

125

|    |             |             |             |
|----|-------------|-------------|-------------|
| C  | -2.34357200 | -3.08837100 | 1.81612300  |
| N  | -2.89414600 | -1.99517100 | 1.01708200  |
| O  | -0.69022700 | -2.08835100 | -0.56379200 |
| C  | 5.79734800  | 0.24548900  | -1.79293000 |
| Si | -2.21669200 | -1.33395200 | -0.52305000 |
| C  | -4.21321600 | -1.61501300 | 1.07324000  |
| N  | 4.55016900  | -0.35423200 | -1.35483500 |
| Si | 1.94714500  | -0.85275700 | -0.77587000 |
| N  | -4.55568400 | -0.86567800 | 0.07450500  |
| C  | 0.40699200  | -1.48389000 | 0.08579800  |
| C  | 4.55027200  | -1.38393900 | -0.58085400 |
| C  | -5.88199500 | -0.32163700 | -0.12151300 |
| N  | 3.31545100  | -1.88838600 | -0.22315200 |
| C  | 3.21254400  | -3.00250000 | 0.71865800  |
| H  | -6.41935400 | -0.13845500 | 0.81811600  |
| H  | -5.79965500 | 0.62212900  | -0.66350400 |
| H  | -6.49224300 | -1.00269800 | -0.73252500 |
| H  | -3.06420700 | -3.90869500 | 1.90783600  |
| H  | -1.45105200 | -3.46409000 | 1.31326800  |
| H  | -2.05224300 | -2.75741200 | 2.81707300  |
| H  | 5.62200300  | 0.77168100  | -2.73666900 |

|    |             |             |             |
|----|-------------|-------------|-------------|
| H  | 6.15000800  | 0.98633400  | -1.06291200 |
| H  | 6.60664500  | -0.48171700 | -1.94735500 |
| H  | 3.65533100  | -2.75656100 | 1.69249700  |
| H  | 2.15788000  | -3.23482100 | 0.86841100  |
| H  | 3.71401300  | -3.89720700 | 0.33426000  |
| P  | -1.66958400 | 0.91866500  | -0.10666900 |
| P  | 1.73323600  | 0.84924600  | 0.66217500  |
| Fe | 0.02161100  | 2.35107000  | 0.01296000  |
| C  | -1.17838500 | 3.66740400  | -0.14356300 |
| C  | 0.75366900  | 2.61015100  | -1.55096300 |
| C  | 1.01689300  | 3.44598000  | 1.01993000  |
| O  | 1.16604400  | 2.80572100  | -2.61244000 |
| O  | -1.81887800 | 4.61744500  | -0.24580300 |
| O  | 1.61993900  | 4.18771400  | 1.66161500  |
| Si | -3.29869400 | -2.35611500 | -2.36417400 |
| Si | 1.68078100  | -0.89686400 | -3.11979200 |
| C  | -0.03324800 | -0.25711500 | -3.61885700 |
| C  | 1.81622900  | -2.73988900 | -3.56215000 |
| C  | 2.96727100  | 0.09065500  | -4.09151100 |
| C  | -2.05360300 | -3.37212500 | -3.37525400 |
| C  | -4.54737500 | -3.59242400 | -1.63252400 |
| C  | -4.21365600 | -1.14469900 | -3.49732000 |
| H  | 1.68561900  | -2.89665900 | -4.64061000 |
| H  | 2.79738200  | -3.13696400 | -3.27667200 |
| H  | 1.04969100  | -3.32296000 | -3.03978400 |
| H  | -0.24382900 | -0.51522200 | -4.66476200 |
| H  | -0.81024400 | -0.70186700 | -2.99525100 |
| H  | -0.09949800 | 0.82848600  | -3.51935500 |
| H  | 3.95636700  | -0.36679200 | -4.00887000 |
| H  | 2.68338000  | 0.12811100  | -5.15151200 |
| H  | 3.03741100  | 1.11941300  | -3.72376100 |
| H  | -1.49982600 | -4.05617300 | -2.72249200 |

|   |             |             |             |
|---|-------------|-------------|-------------|
| H | -2.58154400 | -3.97194000 | -4.12815700 |
| H | -1.32261900 | -2.74577100 | -3.89348800 |
| H | -4.12174200 | -4.15136500 | -0.79155200 |
| H | -5.44921700 | -3.08494200 | -1.27874500 |
| H | -4.84139800 | -4.31655600 | -2.40286300 |
| H | -3.52241700 | -0.60969500 | -4.15650300 |
| H | -4.92113500 | -1.69364100 | -4.13174400 |
| H | -4.77546400 | -0.40348900 | -2.91972800 |
| C | 0.29431000  | -1.16409900 | 1.39732600  |
| O | -0.03041100 | -1.16122500 | 2.53952500  |
| C | 3.35988500  | 1.48550800  | 1.28169700  |
| C | 3.74466600  | 1.05241400  | 2.57534300  |
| C | 4.24036500  | 2.31047600  | 0.54200600  |
| C | 4.99324600  | 1.43153400  | 3.08402500  |
| C | 5.47782100  | 2.66184600  | 1.09052900  |
| C | 5.88072900  | 2.22519900  | 2.35513600  |
| H | 5.28101700  | 1.08899500  | 4.07623800  |
| H | 6.14780100  | 3.29357500  | 0.51008600  |
| C | -3.26003800 | 1.83602400  | -0.32624600 |
| C | -3.99374100 | 2.20070500  | 0.82724500  |
| C | -3.68229800 | 2.28746900  | -1.59393300 |
| C | -5.13764600 | 2.98879400  | 0.68478300  |
| C | -4.84300100 | 3.06544800  | -1.69170500 |
| C | -5.58504600 | 3.42792700  | -0.56604700 |
| H | -5.70065500 | 3.26385300  | 1.57482400  |
| H | -5.16403400 | 3.40816200  | -2.67356300 |
| C | -5.07825600 | -2.04403000 | 2.20764700  |
| C | -6.28392500 | -2.71738500 | 1.97111100  |
| C | -4.69729000 | -1.75343500 | 3.52607100  |
| C | -7.09618300 | -3.09956800 | 3.03914300  |
| H | -6.57572300 | -2.95082500 | 0.95179600  |
| C | -5.51715100 | -2.12413300 | 4.59088800  |



|   |             |             |             |
|---|-------------|-------------|-------------|
| H | -3.76413700 | -1.22959900 | 3.71061800  |
| C | -6.71608300 | -2.80057300 | 4.34948300  |
| H | -8.02534100 | -3.62900300 | 2.84769100  |
| H | -5.21928600 | -1.88763900 | 5.60851300  |
| H | -7.35171600 | -3.09389300 | 5.18040100  |
| C | 5.78173700  | -2.01937300 | -0.01275000 |
| C | 6.32199800  | -3.18793500 | -0.56213000 |
| C | 6.42004600  | -1.40087200 | 1.07044500  |
| C | 7.49128200  | -3.73557400 | -0.03095600 |
| H | 5.82779900  | -3.66338700 | -1.40545900 |
| C | 7.58443800  | -1.95497500 | 1.60339800  |
| H | 5.99988500  | -0.49185700 | 1.49076600  |
| C | 8.12245800  | -3.12165400 | 1.05381700  |
| H | 7.90845600  | -4.64095100 | -0.46352700 |
| H | 8.07188600  | -1.47366900 | 2.44727500  |
| H | 9.03093900  | -3.55060600 | 1.46795400  |
| C | 3.88309300  | 2.83355200  | -0.82531400 |
| C | 7.24728400  | 2.56970500  | 2.89704300  |
| C | 2.86305900  | 0.16543200  | 3.42968100  |
| C | -2.86503100 | 2.02773700  | -2.83626600 |
| C | -3.55751100 | 1.77581100  | 2.21077700  |
| C | -6.84944900 | 4.24404300  | -0.69075400 |
| H | -6.94302700 | 4.96393800  | 0.13002200  |
| H | -6.87942500 | 4.79787400  | -1.63479400 |
| H | -7.73880000 | 3.60035800  | -0.65871500 |
| H | -1.98967300 | 2.69033800  | -2.87305400 |
| H | -2.47897700 | 1.00754500  | -2.86817700 |
| H | -3.45200400 | 2.20104900  | -3.74339900 |
| H | -2.66350800 | 2.32586500  | 2.53172600  |
| H | -4.34905700 | 1.95766300  | 2.94487700  |
| H | -3.29553800 | 0.71421800  | 2.24400000  |
| H | 3.51322300  | 2.02963000  | -1.46566400 |

|   |            |             |             |
|---|------------|-------------|-------------|
| H | 3.10593400 | 3.60378900  | -0.76540000 |
| H | 4.75215500 | 3.28554900  | -1.31268000 |
| H | 8.00107200 | 1.85635700  | 2.53662900  |
| H | 7.56759600 | 3.56706700  | 2.57647200  |
| H | 7.26572600 | 2.53987300  | 3.99161200  |
| H | 2.79496200 | -0.84887900 | 3.01929200  |
| H | 3.26522000 | 0.08711200  | 4.44524200  |
| H | 1.83511600 | 0.53546400  | 3.49176800  |

### Fe-int6

125

|    |             |             |             |
|----|-------------|-------------|-------------|
| C  | -2.27118600 | 2.93829300  | -1.92628000 |
| N  | -2.88684700 | 2.04733700  | -0.94393500 |
| O  | -0.56856300 | 2.15408400  | 0.51063100  |
| C  | 5.88081200  | -0.66523100 | 1.60732300  |
| Si | -2.07023100 | 1.37052600  | 0.49369700  |
| C  | -4.22410200 | 1.72444700  | -0.94618700 |
| N  | 4.64639200  | 0.05790000  | 1.35988500  |
| Si | 2.03273200  | 0.82343400  | 1.06000800  |
| N  | -4.58435600 | 0.96533700  | 0.03461000  |
| C  | 0.53759900  | 1.38609200  | 0.12520900  |
| C  | 4.66373300  | 1.20280900  | 0.76905600  |
| C  | -5.94748600 | 0.53541900  | 0.25480300  |
| N  | 3.44455500  | 1.82817300  | 0.59036200  |
| C  | 3.33819600  | 3.04744100  | -0.21323700 |
| H  | -6.55227600 | 0.50019000  | -0.66140100 |
| H  | -5.93170200 | -0.46338300 | 0.69756700  |
| H  | -6.45466800 | 1.20420100  | 0.96608200  |
| H  | -2.90662400 | 3.81407800  | -2.09761300 |
| H  | -1.30854600 | 3.26191600  | -1.53332400 |
| H  | -2.08476400 | 2.42800600  | -2.87427600 |
| H  | 5.73002300  | -1.33753400 | 2.45821700  |

|    |             |             |             |
|----|-------------|-------------|-------------|
| H  | 6.14869600  | -1.28485900 | 0.74048400  |
| H  | 6.73861600  | -0.01461000 | 1.82752500  |
| H  | 3.76994500  | 2.91300900  | -1.21251900 |
| H  | 2.28139400  | 3.29315100  | -0.32806200 |
| H  | 3.84685000  | 3.88954600  | 0.26875400  |
| P  | -1.62147600 | -0.95525200 | 0.17305800  |
| P  | 1.65843300  | -0.71878900 | -0.55878100 |
| Fe | -0.00449500 | -2.37236100 | -0.10341700 |
| C  | -1.21121600 | -3.68136400 | -0.01647500 |
| C  | 0.88350100  | -2.93916400 | 1.31526600  |
| C  | 0.77410400  | -3.20674800 | -1.47922200 |
| O  | 1.36892900  | -3.31678600 | 2.29272400  |
| O  | -1.89752800 | -4.60403600 | 0.01541700  |
| O  | 1.24586700  | -3.75448000 | -2.37562700 |
| Si | -3.09838700 | 2.18478000  | 2.46407200  |
| Si | 1.83578900  | 0.42420200  | 3.36510100  |
| C  | 0.10473600  | -0.27272700 | 3.70585900  |
| C  | 2.03419200  | 2.11967600  | 4.19754100  |
| C  | 3.11639700  | -0.77623200 | 4.06526500  |
| C  | -1.77421300 | 3.00343100  | 3.55345300  |
| C  | -4.27029800 | 3.57210400  | 1.89447100  |
| C  | -4.06692500 | 0.91630900  | 3.48296000  |
| H  | 1.93665200  | 2.03128100  | 5.28714400  |
| H  | 3.02180400  | 2.54282600  | 3.97963000  |
| H  | 1.27758900  | 2.83052500  | 3.84758100  |
| H  | -0.14415100 | -0.19811600 | 4.77200300  |
| H  | -0.65839200 | 0.26751500  | 3.14038600  |
| H  | 0.04732300  | -1.32573500 | 3.41762200  |
| H  | 4.12018600  | -0.34720000 | 4.00708400  |
| H  | 2.88763100  | -1.00034500 | 5.11534200  |
| H  | 3.11949400  | -1.71910800 | 3.50923300  |
| H  | -1.14164800 | 3.66674200  | 2.95314500  |

|   |             |             |             |
|---|-------------|-------------|-------------|
| H | -2.25017500 | 3.60279600  | 4.34045500  |
| H | -1.12196900 | 2.27191000  | 4.03863000  |
| H | -3.82876300 | 4.17675700  | 1.09470200  |
| H | -5.21493800 | 3.16237900  | 1.52655500  |
| H | -4.48840900 | 4.23725600  | 2.73958300  |
| H | -3.40658100 | 0.33235800  | 4.13185500  |
| H | -4.78755700 | 1.43706400  | 4.12631800  |
| H | -4.61803600 | 0.22384500  | 2.84014300  |
| C | 0.51415800  | 0.70862100  | -1.09983000 |
| O | -0.27691200 | 0.73492800  | -2.06347800 |
| C | 3.13548200  | -1.16183500 | -1.59291800 |
| C | 3.42066400  | -0.48293800 | -2.80319100 |
| C | 4.05895900  | -2.12209900 | -1.10557400 |
| C | 4.61042800  | -0.77789600 | -3.48306000 |
| C | 5.23350500  | -2.37357600 | -1.81940600 |
| C | 5.53506100  | -1.70819500 | -3.00964100 |
| H | 4.82099100  | -0.24954300 | -4.41061700 |
| H | 5.93228300  | -3.11227100 | -1.43175400 |
| C | -3.26466100 | -1.78251800 | 0.32094900  |
| C | -4.00868200 | -1.98187100 | -0.86414500 |
| C | -3.71424600 | -2.33254700 | 1.53686300  |
| C | -5.20312400 | -2.70153800 | -0.79923200 |
| C | -4.92520600 | -3.03570700 | 1.55818300  |
| C | -5.68532400 | -3.23046400 | 0.40318300  |
| H | -5.77761600 | -2.84868000 | -1.71201100 |
| H | -5.27283000 | -3.45291700 | 2.50136200  |
| C | -5.11526400 | 2.24928800  | -2.02482200 |
| C | -6.16264400 | 3.12330400  | -1.70700900 |
| C | -4.93061200 | 1.84943300  | -3.35553400 |
| C | -7.01090800 | 3.59772300  | -2.70826700 |
| H | -6.30422400 | 3.43493600  | -0.67621600 |
| C | -5.78636400 | 2.31587000  | -4.35328200 |

|   |             |             |             |
|---|-------------|-------------|-------------|
| H | -4.12132700 | 1.16968400  | -3.60355500 |
| C | -6.82561000 | 3.19300700  | -4.03220300 |
| H | -7.81643300 | 4.28113200  | -2.45403700 |
| H | -5.64003700 | 1.99646600  | -5.38141600 |
| H | -7.48871600 | 3.55936100  | -4.81110100 |
| C | 5.89177800  | 1.85982600  | 0.21940000  |
| C | 6.49760700  | 2.94117900  | 0.86958700  |
| C | 6.45267800  | 1.35582500  | -0.96161500 |
| C | 7.65742600  | 3.51326900  | 0.34365600  |
| H | 6.06167400  | 3.32952000  | 1.78635000  |
| C | 7.60624300  | 1.93610000  | -1.48975400 |
| H | 5.97890500  | 0.51711700  | -1.46245700 |
| C | 8.21148000  | 3.01373300  | -0.83774200 |
| H | 8.12671200  | 4.34944500  | 0.85491000  |
| H | 8.03200400  | 1.54553300  | -2.41041300 |
| H | 9.11179800  | 3.46301900  | -1.24807300 |
| C | 3.82196700  | -2.90492300 | 0.16241700  |
| C | 6.83753000  | -1.95723500 | -3.73099400 |
| C | 2.51888100  | 0.57122100  | -3.40139500 |
| C | -2.87724500 | -2.26439500 | 2.79133600  |
| C | -3.51733300 | -1.47657100 | -2.20155500 |
| C | -7.00558700 | -3.96172800 | 0.45002700  |
| H | -7.16047400 | -4.56591100 | -0.45074800 |
| H | -7.06849200 | -4.62374200 | 1.31991200  |
| H | -7.84405500 | -3.25512200 | 0.51363900  |
| H | -2.09096600 | -3.03160100 | 2.77405200  |
| H | -2.37139400 | -1.30326200 | 2.89774500  |
| H | -3.48420800 | -2.43117400 | 3.68638800  |
| H | -2.78398500 | -2.17052100 | -2.63420600 |
| H | -4.34538800 | -1.37749100 | -2.91088500 |
| H | -3.01206500 | -0.50970400 | -2.12158700 |
| H | 3.53242300  | -2.24959500 | 0.98759000  |

|   |            |             |             |
|---|------------|-------------|-------------|
| H | 3.03512400 | -3.65473300 | 0.02590400  |
| H | 4.72809000 | -3.43790900 | 0.46404400  |
| H | 7.64868900 | -1.36466600 | -3.28625100 |
| H | 7.13603300 | -3.00950600 | -3.66934200 |
| H | 6.77124200 | -1.68133700 | -4.78843900 |
| H | 1.47972000 | 0.24352600  | -3.48327600 |
| H | 2.50213700 | 1.47661600  | -2.78292100 |
| H | 2.87540900 | 0.85528900  | -4.39622800 |

#### Fe-ts4

125

|    |             |             |             |
|----|-------------|-------------|-------------|
| C  | 1.92285300  | -3.57825100 | 0.58861400  |
| N  | 2.67764600  | -2.31982900 | 0.50030900  |
| O  | 0.67523200  | -1.27671000 | 2.05202500  |
| C  | -5.62495400 | 1.70476500  | 1.25627200  |
| Si | 2.09679900  | -0.89187400 | 1.42416200  |
| C  | 3.94252300  | -2.32361300 | -0.05961000 |
| N  | -4.51259100 | 0.77670800  | 1.18328000  |
| Si | -2.12677100 | -0.10852200 | 1.23907100  |
| N  | 4.74729300  | -1.37019000 | 0.26322400  |
| C  | -0.73298900 | -1.03056700 | 0.48534500  |
| C  | -4.68867500 | -0.50185000 | 1.17854800  |
| C  | 6.06609800  | -1.24132400 | -0.32495400 |
| N  | -3.52005000 | -1.23387100 | 1.20738200  |
| C  | -3.49101300 | -2.66655700 | 0.92086200  |
| H  | 6.17730900  | -1.71145600 | -1.31241800 |
| H  | 6.30275100  | -0.17797400 | -0.42538800 |
| H  | 6.82383800  | -1.68067900 | 0.33979700  |
| H  | 2.54824600  | -4.37765100 | 1.00470200  |
| H  | 1.07765200  | -3.40910600 | 1.25668700  |
| H  | 1.53798400  | -3.89948900 | -0.38210500 |
| H  | -5.30479500 | 2.60097900  | 1.79621900  |

|    |             |             |             |
|----|-------------|-------------|-------------|
| H  | -5.93139500 | 2.01588900  | 0.24914700  |
| H  | -6.50696300 | 1.29121500  | 1.76300300  |
| H  | -4.03012500 | -2.89795400 | -0.00537200 |
| H  | -2.45097000 | -2.97384100 | 0.80376600  |
| H  | -3.93653300 | -3.24894700 | 1.73404300  |
| P  | 1.78268000  | 0.85340800  | -0.27340900 |
| P  | -1.54119700 | 0.48812800  | -0.84125200 |
| Fe | 0.22362800  | 1.96982000  | -1.30338400 |
| C  | 1.50920300  | 3.03560100  | -1.92247500 |
| C  | -0.53041800 | 3.23324500  | -0.33447200 |
| C  | -0.60662600 | 2.10460000  | -2.88998200 |
| O  | -0.94285000 | 4.06850900  | 0.34692100  |
| O  | 2.24070300  | 3.78526700  | -2.39669400 |
| O  | -1.10195700 | 2.19500400  | -3.92505600 |
| Si | 3.64396000  | -0.37955300 | 3.14263000  |
| Si | -1.67358700 | 0.93055400  | 3.29607500  |
| C  | -0.12172900 | 1.98577900  | 3.14325800  |
| C  | -1.40316100 | -0.48662200 | 4.51725100  |
| C  | -3.13410200 | 2.01282900  | 3.81840300  |
| C  | 2.70837300  | 0.28610200  | 4.65955100  |
| C  | 4.29065200  | -2.11470000 | 3.57483100  |
| C  | 5.10593800  | 0.77825000  | 2.81313400  |
| H  | -1.11710000 | -0.09714000 | 5.50269500  |
| H  | -2.30673400 | -1.09507400 | 4.64045100  |
| H  | -0.59667500 | -1.12131900 | 4.13644600  |
| H  | 0.14377200  | 2.41784600  | 4.11575100  |
| H  | 0.69679200  | 1.34435900  | 2.81493200  |
| H  | -0.24024700 | 2.80148100  | 2.42590500  |
| H  | -4.06264200 | 1.43708500  | 3.88039300  |
| H  | -2.93485000 | 2.45791800  | 4.80180200  |
| H  | -3.29157700 | 2.82698100  | 3.10282500  |
| H  | 1.80677100  | -0.30157900 | 4.86249300  |

|   |             |             |             |
|---|-------------|-------------|-------------|
| H | 3.35668900  | 0.23855500  | 5.54461800  |
| H | 2.40517100  | 1.33001300  | 4.52590500  |
| H | 3.46975000  | -2.79594200 | 3.82653000  |
| H | 4.84122600  | -2.53581600 | 2.72841000  |
| H | 4.96586600  | -2.06357300 | 4.43909700  |
| H | 4.83045600  | 1.82950000  | 2.93841000  |
| H | 5.90398200  | 0.55379600  | 3.53364100  |
| H | 5.49827800  | 0.64237100  | 1.80440500  |
| C | -0.29021300 | -1.50991300 | -0.65434000 |
| O | 0.32188800  | -2.04304200 | -1.53090600 |
| C | -3.06166400 | 0.43345400  | -1.91747100 |
| C | -3.41459700 | -0.71054700 | -2.66888600 |
| C | -3.94120800 | 1.54605900  | -1.88769900 |
| C | -4.64999300 | -0.73740300 | -3.32740000 |
| C | -5.15777000 | 1.47303000  | -2.57258500 |
| C | -5.54292400 | 0.33379300  | -3.28349500 |
| H | -4.91717600 | -1.62596500 | -3.89545400 |
| H | -5.82195000 | 2.33471100  | -2.54951200 |
| C | 3.42140000  | 1.68740600  | -0.44634400 |
| C | 4.25647700  | 1.34056600  | -1.53076700 |
| C | 3.78883400  | 2.74548500  | 0.41265600  |
| C | 5.46178000  | 2.02558300  | -1.70491900 |
| C | 5.00643600  | 3.39968900  | 0.20374800  |
| C | 5.86308000  | 3.05003000  | -0.84248900 |
| H | 6.10536300  | 1.75005100  | -2.53844600 |
| H | 5.29103800  | 4.20638400  | 0.87655300  |
| C | 4.24982600  | -3.41340400 | -1.04319000 |
| C | 5.33620900  | -4.27505300 | -0.84961400 |
| C | 3.45925400  | -3.55070600 | -2.19418200 |
| C | 5.63080100  | -5.26206900 | -1.79169800 |
| H | 5.94713500  | -4.17107300 | 0.04278300  |
| C | 3.76332200  | -4.52773100 | -3.14151700 |



|   |             |             |             |
|---|-------------|-------------|-------------|
| H | 2.60156100  | -2.89783600 | -2.32997600 |
| C | 4.84782300  | -5.38685800 | -2.94150400 |
| H | 6.47187400  | -5.93071900 | -1.62880300 |
| H | 3.14960500  | -4.62333700 | -4.03332000 |
| H | 5.07990400  | -6.15191400 | -3.67766200 |
| C | -6.00142300 | -1.20782700 | 1.11976300  |
| C | -6.44309400 | -2.00795200 | 2.18129900  |
| C | -6.80360400 | -1.05784600 | -0.01939200 |
| C | -7.67995700 | -2.64882300 | 2.10541800  |
| H | -5.82041500 | -2.11968100 | 3.06479500  |
| C | -8.03381700 | -1.71079300 | -0.09711800 |
| H | -6.45130900 | -0.43983300 | -0.83965900 |
| C | -8.47456800 | -2.50450300 | 0.96487700  |
| H | -8.02214400 | -3.26204600 | 2.93436800  |
| H | -8.64850900 | -1.59891800 | -0.98628800 |
| H | -9.43480400 | -3.00934700 | 0.90488900  |
| C | -3.59715000 | 2.83539700  | -1.18277000 |
| C | -6.89167400 | 0.25459200  | -3.95695200 |
| C | -2.51338100 | -1.91464400 | -2.80158700 |
| C | 2.87375200  | 3.22165100  | 1.51562300  |
| C | 3.84767800  | 0.29275600  | -2.53904700 |
| C | 7.19359900  | 3.74041200  | -1.02421000 |
| H | 7.47897200  | 3.79009000  | -2.08071300 |
| H | 7.17433900  | 4.76103000  | -0.62733800 |
| H | 7.99142600  | 3.20023300  | -0.49695800 |
| H | 1.98267000  | 3.71836300  | 1.11098700  |
| H | 2.50953300  | 2.39651200  | 2.13345800  |
| H | 3.38263300  | 3.93357800  | 2.17271600  |
| H | 3.10596700  | 0.69636200  | -3.24188300 |
| H | 4.70774400  | -0.05268900 | -3.12101000 |
| H | 3.39106400  | -0.57836900 | -2.06273100 |
| H | -3.25522800 | 2.65911100  | -0.16000900 |

|   |             |             |             |
|---|-------------|-------------|-------------|
| H | -2.80648600 | 3.37611800  | -1.71514600 |
| H | -4.46610800 | 3.49763300  | -1.13569500 |
| H | -7.65134200 | -0.13542200 | -3.26545100 |
| H | -7.23319000 | 1.24004200  | -4.29081000 |
| H | -6.86924200 | -0.41329100 | -4.82426900 |
| H | -1.49449100 | -1.63509300 | -3.08193300 |
| H | -2.43970800 | -2.47360300 | -1.86260600 |
| H | -2.89831100 | -2.59939900 | -3.56328300 |

### Fe-int7

125

|    |             |             |             |
|----|-------------|-------------|-------------|
| C  | 3.33196800  | -2.06469100 | 2.20060000  |
| N  | 3.63237900  | -1.09401800 | 1.14487100  |
| O  | 1.53859000  | 0.47229800  | 2.14801000  |
| C  | -3.42240100 | 2.76180600  | 0.64625600  |
| Si | 2.72905800  | 0.46899500  | 1.10521000  |
| C  | 4.65039700  | -1.33114300 | 0.25274500  |
| N  | -3.45834000 | 1.42041400  | 1.19963100  |
| Si | -2.37089300 | 0.26488500  | 2.10788900  |
| N  | 4.90814000  | -0.44346300 | -0.65198800 |
| C  | -1.37005300 | -0.70645200 | 0.95192400  |
| C  | -4.51920300 | 0.61142100  | 1.37345800  |
| C  | 5.95946100  | -0.66278300 | -1.62705100 |
| N  | -4.09509300 | -0.40818300 | 2.13764800  |
| C  | -4.70509700 | -1.72162500 | 2.27873600  |
| C  | 5.41068700  | -2.62038800 | 0.40140800  |
| C  | 5.00629600  | -3.76633300 | -0.29348400 |
| C  | 6.54842000  | -2.67531800 | 1.21630900  |
| C  | 5.73053700  | -4.95353000 | -0.17187100 |
| H  | 4.11902300  | -3.72585200 | -0.91795600 |
| C  | 7.27324900  | -3.86220400 | 1.33543900  |
| H  | 6.86172700  | -1.78520200 | 1.75624900  |
| C  | 6.86498500  | -5.00415400 | 0.64181200  |

|    |             |             |             |
|----|-------------|-------------|-------------|
| H  | 5.40780000  | -5.83953400 | -0.71239200 |
| H  | 8.15556400  | -3.89515000 | 1.96931000  |
| H  | 7.42839700  | -5.92880900 | 0.73507600  |
| C  | -5.86224500 | 0.76906500  | 0.80548600  |
| C  | -6.99193100 | 0.40576400  | 1.55698000  |
| C  | -6.01574000 | 1.22341200  | -0.51378100 |
| C  | -8.26127600 | 0.50325900  | 0.99339500  |
| H  | -6.87361400 | 0.06654200  | 2.58082500  |
| C  | -7.28729600 | 1.30491700  | -1.07586300 |
| H  | -5.14347700 | 1.47538800  | -1.10354600 |
| C  | -8.40924000 | 0.94719100  | -0.32431500 |
| H  | -9.13396500 | 0.23116100  | 1.57919600  |
| H  | -7.40048400 | 1.64060200  | -2.10211200 |
| H  | -9.39989500 | 1.01311400  | -0.76477500 |
| H  | 6.47692900  | 0.28640600  | -1.81451500 |
| H  | 6.71282100  | -1.40731400 | -1.33370000 |
| H  | 5.53285800  | -0.98664100 | -2.58801700 |
| H  | 3.00860000  | -3.02475400 | 1.78492100  |
| H  | 4.19996600  | -2.23749400 | 2.84835200  |
| H  | 2.51569000  | -1.65619100 | 2.79481100  |
| H  | -2.75880100 | 3.38368900  | 1.25199900  |
| H  | -3.03448100 | 2.74110700  | -0.37712600 |
| H  | -4.42194200 | 3.20433100  | 0.64957900  |
| H  | -5.28315600 | -1.98411200 | 1.38826200  |
| H  | -3.90836800 | -2.45976500 | 2.39702100  |
| H  | -5.35064800 | -1.76904700 | 3.16198900  |
| P  | 1.85581300  | 0.49657000  | -1.07888600 |
| P  | -1.54465100 | -0.40735200 | -0.88952700 |
| Fe | 0.43816900  | -0.83233600 | -1.97292800 |
| C  | -0.16196900 | -2.03571300 | -3.12970900 |
| C  | 0.08939800  | 0.49044900  | -3.14013200 |
| C  | 1.14812700  | -2.17890800 | -1.02369800 |

|   |             |             |             |
|---|-------------|-------------|-------------|
| O | -0.12655000 | 1.30965900  | -3.92257400 |
| O | -0.56439500 | -2.81078500 | -3.88876200 |
| O | 1.64693800  | -3.11707500 | -0.57191200 |
| C | -2.95837000 | -1.50986400 | -1.37217000 |
| C | -3.24375100 | -2.79701500 | -0.85720800 |
| C | -3.88726300 | -0.92487500 | -2.27911200 |
| C | -4.48835000 | -3.38651000 | -1.12361700 |
| C | -5.10859500 | -1.55341500 | -2.52487600 |
| C | -5.44954900 | -2.76926300 | -1.92410700 |
| H | -4.70122800 | -4.36893600 | -0.70458200 |
| H | -5.81832800 | -1.07900100 | -3.20039300 |
| C | 1.88970000  | 2.25726100  | -1.62755000 |
| C | 2.73274500  | 2.64623300  | -2.69089400 |
| C | 1.08440500  | 3.22277600  | -0.97920600 |
| C | 2.78079800  | 3.99246400  | -3.06625700 |
| C | 1.17346400  | 4.55917900  | -1.38214800 |
| C | 2.02091200  | 4.96781000  | -2.41610400 |
| H | 3.43691100  | 4.28666500  | -3.88334700 |
| H | 0.55659900  | 5.30073800  | -0.87725500 |
| C | -2.24398300 | -3.60320700 | -0.05989700 |
| C | -6.80955000 | -3.38523100 | -2.14860100 |
| C | -3.57433200 | 0.35641600  | -3.02312700 |
| C | 3.57805100  | 1.63574000  | -3.42919300 |
| C | 0.10952700  | 2.83670800  | 0.10880300  |
| C | 2.12969800  | 6.42401200  | -2.80199300 |
| H | 4.29200800  | 2.12980100  | -4.09597700 |
| H | 4.13190600  | 1.00445000  | -2.72884400 |
| H | 2.95360400  | 0.96857700  | -4.03734600 |
| H | 1.19082900  | 6.95909600  | -2.62145000 |
| H | 2.90952300  | 6.92919800  | -2.21632400 |
| H | 2.39095900  | 6.54084000  | -3.85937700 |
| H | 0.59695200  | 2.31735700  | 0.94002600  |

|    |             |             |             |
|----|-------------|-------------|-------------|
| H  | -0.39878900 | 3.72211900  | 0.50523600  |
| H  | -0.64996200 | 2.14646200  | -0.28178800 |
| H  | -1.21819200 | -3.41359200 | -0.38630500 |
| H  | -2.28267200 | -3.38305200 | 1.01227200  |
| H  | -2.43955400 | -4.67388800 | -0.17895500 |
| H  | -6.84594200 | -4.42224400 | -1.79928300 |
| H  | -7.58668100 | -2.82536200 | -1.61080400 |
| H  | -7.08455100 | -3.37506600 | -3.20989000 |
| H  | -4.45119400 | 0.71721200  | -3.57087500 |
| H  | -3.22090100 | 1.14855800  | -2.35367100 |
| H  | -2.77177100 | 0.20293400  | -3.75528500 |
| Si | 4.26646400  | 2.23727600  | 1.38257200  |
| Si | -1.46420100 | 0.97645700  | 4.16352000  |
| C  | -2.93911800 | 1.30322900  | 5.31005000  |
| C  | -0.43881400 | 2.52548400  | 3.84835900  |
| C  | -0.34726200 | -0.41436300 | 4.77422000  |
| C  | 5.62781300  | 1.50923400  | 2.49988700  |
| C  | 5.10041800  | 2.99428100  | -0.14162300 |
| C  | 3.36029300  | 3.63597100  | 2.30180400  |
| H  | -0.09593400 | 2.94364800  | 4.80357600  |
| H  | 0.43467000  | 2.21928500  | 3.26128700  |
| H  | -0.98315300 | 3.31068400  | 3.31192900  |
| H  | -3.60014400 | 2.07750600  | 4.90276200  |
| H  | -3.53647000 | 0.39791400  | 5.46746800  |
| H  | -2.58575800 | 1.64823300  | 6.28981500  |
| H  | 0.04776000  | -0.16718600 | 5.76785100  |
| H  | -0.85310000 | -1.38392700 | 4.84321200  |
| H  | 0.49203300  | -0.48803900 | 4.07247000  |
| H  | 6.36062700  | 2.27236300  | 2.79260900  |
| H  | 5.21014500  | 1.07074300  | 3.41384200  |
| H  | 6.15910400  | 0.71716400  | 1.95878400  |
| H  | 5.50563200  | 2.20906600  | -0.78580100 |

|   |             |             |             |
|---|-------------|-------------|-------------|
| H | 4.39515300  | 3.58736400  | -0.73126000 |
| H | 5.92400100  | 3.65136800  | 0.16895800  |
| H | 2.83184100  | 3.25476400  | 3.18242700  |
| H | 4.05492600  | 4.42181100  | 2.62631500  |
| H | 2.61593500  | 4.09625500  | 1.64020200  |
| C | -0.48142100 | -1.53227400 | 1.46459000  |
| O | 0.25041900  | -2.33543100 | 1.89008600  |

**Fe-int8**

125

|    |             |             |             |
|----|-------------|-------------|-------------|
| Fe | 0.75144700  | -2.41261500 | 1.56888100  |
| P  | 1.58720200  | -1.48335400 | -0.15140800 |
| Si | -2.70680700 | 0.27556500  | 1.50699500  |
| O  | -1.01675600 | -0.27456600 | 2.40224400  |
| N  | -2.22146000 | 2.03057100  | 1.49746100  |
| C  | -3.05413900 | 3.58998800  | -0.28017100 |
| P  | -2.00501500 | -2.19554400 | -0.74995300 |
| Si | -4.15314500 | -0.44184200 | 3.20915800  |
| O  | -1.29567200 | -4.36040700 | 2.38506200  |
| N  | -3.80622400 | 1.25786900  | 0.27498100  |
| C  | -4.16444600 | 4.43787900  | -0.35815300 |
| H  | -5.06381600 | 4.21091900  | 0.20701400  |
| O  | 2.79914000  | -4.52670700 | 1.30174600  |
| C  | -4.10242500 | 5.58206400  | -1.15521400 |
| H  | -4.95878000 | 6.24814400  | -1.21042600 |
| O  | 1.64548100  | -1.36970300 | 4.15073300  |
| C  | -2.94421300 | 5.86602700  | -1.88351500 |
| H  | -2.90266900 | 6.75434300  | -2.50798800 |
| C  | -1.84239700 | 5.00775800  | -1.81501700 |
| H  | -0.94620400 | 5.22232300  | -2.39099300 |
| C  | -1.88720400 | 3.86983700  | -1.01082500 |
| H  | -1.05538900 | 3.16909200  | -0.95611200 |

|   |             |             |             |
|---|-------------|-------------|-------------|
| C | -3.06515900 | 2.33707600  | 0.50321300  |
| C | -1.12373800 | 2.84165100  | 1.98404400  |
| C | -0.73070500 | -1.13376400 | 1.48558100  |
| C | -1.84193800 | -1.08961300 | 0.50984600  |
| C | -3.56032600 | -2.13193500 | 3.82837700  |
| H | -4.19598700 | -2.49927300 | 4.64344900  |
| H | -2.53357400 | -2.05925200 | 4.20453600  |
| H | -3.56426700 | -2.88460200 | 3.03237700  |
| C | -5.02866500 | 1.21907900  | -0.49966600 |
| C | 3.08734700  | -2.14037300 | -0.98110600 |
| C | 4.36746200  | -2.10516800 | -0.38714100 |
| C | 5.46602200  | -2.55541600 | -1.12642700 |
| H | 6.45346700  | -2.52253400 | -0.66884200 |
| C | 5.33657600  | -3.04543100 | -2.42838300 |
| C | 4.05736500  | -3.09245000 | -2.98907300 |
| H | 3.93277300  | -3.47798200 | -3.99922300 |
| C | 2.93214500  | -2.64548900 | -2.29264100 |
| C | -3.58184000 | -1.72687800 | -1.58664500 |
| C | -3.54563000 | -0.78937500 | -2.64218600 |
| C | -4.71442600 | -0.54891500 | -3.37102600 |
| H | -4.68744300 | 0.17897600  | -4.17989500 |
| C | -5.91582200 | -1.20216300 | -3.08033400 |
| C | -5.93047400 | -2.12162500 | -2.02626200 |
| H | -6.85845500 | -2.63433200 | -1.78016600 |
| C | -4.78062700 | -2.40702700 | -1.28115900 |
| C | -5.92463700 | -0.55809000 | 2.53686400  |
| H | -6.60428600 | -0.96389600 | 3.29654400  |
| H | -5.98453100 | -1.20332800 | 1.65320100  |
| H | -6.29623800 | 0.43188500  | 2.24798700  |
| C | -4.08783000 | 0.81969600  | 4.62433000  |
| H | -4.75121900 | 0.52285300  | 5.44636800  |
| H | -4.39568200 | 1.81488300  | 4.28305200  |

|   |             |             |             |
|---|-------------|-------------|-------------|
| H | -3.07084900 | 0.90309700  | 5.02467000  |
| C | -0.49352600 | -3.59260800 | 2.07392600  |
| C | 2.01956000  | -3.68679200 | 1.40838300  |
| C | 1.26554200  | -1.80733600 | 3.15490400  |
| C | 4.59741400  | -1.63524600 | 1.03125000  |
| C | 6.54713200  | -3.48125300 | -3.21926700 |
| C | 1.57139500  | -2.71204700 | -2.95119600 |
| C | -2.27335600 | -0.04900000 | -2.98000800 |
| C | -7.15829500 | -0.93976600 | -3.89824700 |
| C | -4.84388400 | -3.42071400 | -0.15877000 |
| H | 6.95720900  | -2.64538300 | -3.80197300 |
| H | 7.34636700  | -3.84422800 | -2.56403800 |
| H | 6.29819300  | -4.27884800 | -3.92771100 |
| H | 1.09800800  | -1.72273000 | -3.00595500 |
| H | 1.64766700  | -3.09878400 | -3.97248900 |
| H | 0.88104700  | -3.35664000 | -2.39370800 |
| H | -5.83926700 | -3.86940400 | -0.08539200 |
| H | -4.12178300 | -4.23437900 | -0.30774200 |
| H | -4.60966500 | -2.96712100 | 0.81119300  |
| H | -7.18555700 | 0.09176200  | -4.26582000 |
| H | -7.19802900 | -1.59830500 | -4.77610200 |
| H | -8.06814700 | -1.11916500 | -3.31557200 |
| H | -1.83466200 | 0.45469600  | -2.11006000 |
| H | -1.50660400 | -0.74062000 | -3.35730000 |
| H | -2.44473700 | 0.69910900  | -3.75952500 |
| H | -4.89472000 | 1.69697500  | -1.47516100 |
| H | -5.31275500 | 0.18116000  | -0.66168200 |
| H | -5.85099600 | 1.72225400  | 0.02681000  |
| H | -0.80144200 | 2.43824200  | 2.94553400  |
| H | -0.28842600 | 2.80545200  | 1.28376300  |
| H | -1.45754500 | 3.87509200  | 2.12598400  |
| H | 4.50438500  | -2.46873800 | 1.73902000  |



|    |             |             |             |
|----|-------------|-------------|-------------|
| H  | 5.60571800  | -1.22423800 | 1.14214900  |
| H  | 3.88222000  | -0.86819800 | 1.33060900  |
| Si | 1.33199600  | 0.79721100  | -0.67545800 |
| O  | -0.17302300 | 1.15219800  | -0.34386900 |
| Si | 2.07034200  | 1.53675000  | -2.79360100 |
| C  | 0.52854200  | 1.72254800  | -3.89755800 |
| C  | 2.72744100  | 3.31058000  | -2.55367200 |
| C  | 3.30425100  | 0.46929200  | -3.76183900 |
| H  | 0.78088400  | 2.27866800  | -4.81038400 |
| H  | 0.13393100  | 0.74748400  | -4.20236900 |
| H  | -0.27578700 | 2.25788900  | -3.38128700 |
| H  | 1.97545600  | 3.93140000  | -2.04986800 |
| H  | 3.64329300  | 3.33996100  | -1.95782700 |
| H  | 2.93523600  | 3.76935100  | -3.52934300 |
| H  | 3.79223700  | 1.07182400  | -4.53950600 |
| H  | 4.06995600  | 0.04815500  | -3.10881000 |
| H  | 2.79075300  | -0.35990500 | -4.26086700 |
| N  | 2.46978700  | 1.40065400  | 0.59999800  |
| C  | 2.01228500  | 1.43795500  | 1.99351800  |
| C  | 3.81396100  | 1.62028900  | 0.33704200  |
| H  | 1.02294400  | 0.98641100  | 2.04818900  |
| H  | 2.68309600  | 0.87195300  | 2.65092800  |
| H  | 1.94243300  | 2.46100200  | 2.38048200  |
| C  | 4.53855400  | 2.51731000  | 1.29917900  |
| C  | 5.62107400  | 2.04944200  | 2.05329900  |
| C  | 4.13301000  | 3.85212400  | 1.43748500  |
| C  | 6.28852000  | 2.90237400  | 2.93432800  |
| H  | 5.93415700  | 1.01460500  | 1.94994700  |
| C  | 4.80618800  | 4.70750400  | 2.30896600  |
| H  | 3.28755200  | 4.20976500  | 0.85554800  |
| C  | 5.88406000  | 4.23290800  | 3.06215800  |
| H  | 7.12390600  | 2.52774700  | 3.51978500  |

|   |            |            |             |
|---|------------|------------|-------------|
| H | 4.48874400 | 5.74254800 | 2.40400300  |
| H | 6.40528800 | 4.89745300 | 3.74592900  |
| N | 4.32862600 | 1.08758100 | -0.71442800 |
| C | 5.67352000 | 1.37858600 | -1.15996400 |
| H | 5.63217500 | 1.76706800 | -2.18648300 |
| H | 6.23375300 | 2.09698700 | -0.54560900 |
| H | 6.24235700 | 0.44005300 | -1.20343000 |

### Fe-ts6

125

|    |             |             |             |
|----|-------------|-------------|-------------|
| Fe | -0.78814545 | -2.61292921 | -1.52992872 |
| P  | -1.52165848 | -1.52661559 | 0.18731799  |
| Si | 2.76084537  | -0.15242163 | -1.59068972 |
| O  | 1.00907630  | -0.51793723 | -2.34324136 |
| N  | 2.46832715  | 1.63307365  | -1.52858178 |
| C  | 3.91477770  | 3.22146094  | -0.23804590 |
| P  | 1.78390917  | -2.15343895 | 1.01789121  |
| Si | 3.99909492  | -1.13732387 | -3.32256263 |
| O  | 1.14786733  | -4.79887243 | -1.72378728 |
| N  | 4.15449597  | 0.73506579  | -0.55919806 |
| C  | 5.22118320  | 3.71732005  | -0.35201854 |
| H  | 5.97911621  | 3.13500463  | -0.86703090 |
| O  | -3.11209942 | -4.40527932 | -1.24357863 |
| C  | 5.53588399  | 4.96771526  | 0.17856682  |
| H  | 6.54494428  | 5.35761699  | 0.08040461  |
| O  | -1.23220569 | -1.92339548 | -4.34800734 |
| C  | 4.55463529  | 5.71390981  | 0.83701499  |
| H  | 4.80393039  | 6.68522063  | 1.25553528  |
| C  | 3.25601522  | 5.21201815  | 0.96144978  |

|   |             |             |             |
|---|-------------|-------------|-------------|
| H | 2.49685279  | 5.78843493  | 1.48262681  |
| C | 2.92481446  | 3.97032470  | 0.42046507  |
| H | 1.92358783  | 3.55896107  | 0.53209297  |
| C | 3.55047804  | 1.89629889  | -0.76925926 |
| C | 1.55225098  | 2.57575939  | -2.14493224 |
| C | 0.71941468  | -1.41306971 | -1.44310443 |
| C | 1.83034455  | -1.35190660 | -0.46620329 |
| C | 2.89677248  | -2.40913412 | -4.19122986 |
| H | 3.41192505  | -2.86311632 | -5.04673301 |
| H | 1.97185506  | -1.94468516 | -4.54917083 |
| H | 2.61536521  | -3.21420874 | -3.50231156 |
| C | 5.39554942  | 0.51104704  | 0.14972539  |
| C | -3.09463116 | -2.16128218 | 0.92989884  |
| C | -4.36313594 | -1.87812196 | 0.37052983  |
| C | -5.51881668 | -2.20305831 | 1.08691533  |
| H | -6.48955723 | -1.97301742 | 0.64938278  |
| C | -5.46859826 | -2.83058142 | 2.33494328  |
| C | -4.21133677 | -3.15893120 | 2.84752841  |
| H | -4.14588093 | -3.67438473 | 3.80457649  |
| C | -3.03025673 | -2.83989478 | 2.17119289  |
| C | 3.24743992  | -1.51031940 | 1.94162071  |
| C | 3.18235932  | -0.24350497 | 2.56493587  |
| C | 4.24936531  | 0.16625100  | 3.36998360  |
| H | 4.20109070  | 1.14456306  | 3.84474539  |
| C | 5.37329238  | -0.63931465 | 3.57834965  |
| C | 5.41448458  | -1.89098828 | 2.95636386  |
| H | 6.28359473  | -2.52979576 | 3.10178011  |
| C | 4.36696680  | -2.34592928 | 2.14813003  |
| C | 5.52141270  | -2.00080539 | -2.58845498 |
| H | 6.09211977  | -2.51215080 | -3.37370786 |
| H | 5.22832651  | -2.75314039 | -1.84646267 |
| H | 6.19185380  | -1.28818601 | -2.09565156 |

|   |             |             |             |
|---|-------------|-------------|-------------|
| C | 4.54947338  | 0.22020352  | -4.52866299 |
| H | 5.17081464  | -0.19539351 | -5.33167711 |
| H | 5.13554600  | 0.99058556  | -4.01347024 |
| H | 3.68504517  | 0.71064744  | -4.99063647 |
| C | 0.36851268  | -3.94484142 | -1.67091619 |
| C | -2.21721443 | -3.68487584 | -1.35331582 |
| C | -1.04145669 | -2.22706227 | -3.25062904 |
| C | -4.50330501 | -1.27174514 | -1.00567905 |
| C | -6.73021170 | -3.12772882 | 3.11061902  |
| C | -1.70162219 | -3.24143029 | 2.76914328  |
| C | 1.99535558  | 0.66606885  | 2.36436141  |
| C | 6.49879432  | -0.18083544 | 4.47522262  |
| C | 4.46729283  | -3.69788526 | 1.47572686  |
| H | -6.98785958 | -2.29849570 | 3.78392446  |
| H | -7.58591194 | -3.28101979 | 2.44356843  |
| H | -6.61905919 | -4.02431883 | 3.73064003  |
| H | -1.01494526 | -2.38878167 | 2.85184525  |
| H | -1.82917837 | -3.67588637 | 3.76612991  |
| H | -1.18670626 | -3.97795091 | 2.13874537  |
| H | 5.35692224  | -4.24171228 | 1.80772987  |
| H | 3.59250226  | -4.32581126 | 1.69139806  |
| H | 4.52461970  | -3.60003406 | 0.38408538  |
| H | 6.60925701  | 0.90878130  | 4.45390911  |
| H | 6.31266833  | -0.46802861 | 5.51867150  |
| H | 7.45460462  | -0.62732517 | 4.18078880  |
| H | 1.91058614  | 1.02274243  | 1.33524206  |
| H | 1.04579730  | 0.15353073  | 2.56827782  |
| H | 2.04698594  | 1.54512772  | 3.01268587  |
| H | 5.50779700  | 1.21044256  | 0.98306747  |
| H | 5.39665727  | -0.50086054 | 0.55431123  |
| H | 6.26055814  | 0.61882640  | -0.51845209 |
| H | 1.03525184  | 2.05696073  | -2.95445208 |

|    |             |             |             |
|----|-------------|-------------|-------------|
| H  | 0.81231629  | 2.91987907  | -1.42044225 |
| H  | 2.09894452  | 3.42896560  | -2.56156980 |
| H  | -4.22433863 | -1.98988493 | -1.78541354 |
| H  | -5.53880682 | -0.96965805 | -1.19256623 |
| H  | -3.85914636 | -0.39951384 | -1.13201611 |
| Si | -1.47222883 | 2.10010404  | 0.94130703  |
| O  | 0.02340432  | 2.42776830  | 0.68833635  |
| Si | -2.36581886 | 2.04083342  | 3.12659550  |
| C  | -0.88090406 | 2.41622797  | 4.24701590  |
| C  | -3.61366911 | 3.45032675  | 3.35142765  |
| C  | -3.07096254 | 0.34328483  | 3.52684181  |
| H  | -1.21248773 | 2.48125742  | 5.29157290  |
| H  | -0.10185415 | 1.65044967  | 4.18436094  |
| H  | -0.41841756 | 3.37332995  | 3.97899976  |
| H  | -3.11719627 | 4.42411035  | 3.26672051  |
| H  | -4.42067415 | 3.41095234  | 2.61683874  |
| H  | -4.05767653 | 3.39019785  | 4.35345914  |
| H  | -3.38723102 | 0.29663004  | 4.57671423  |
| H  | -3.91782166 | 0.10508834  | 2.88005171  |
| H  | -2.30943647 | -0.42408743 | 3.36445862  |
| N  | -2.50970004 | 1.98938957  | -0.45320086 |
| C  | -1.90468131 | 1.81961490  | -1.78885985 |
| C  | -3.91535465 | 2.04804911  | -0.34260285 |
| H  | -1.00399037 | 1.20988923  | -1.69925184 |
| H  | -2.60091000 | 1.29423764  | -2.44733639 |
| H  | -1.64430725 | 2.77723690  | -2.25232468 |
| C  | -4.61904028 | 2.73837664  | -1.47080144 |
| C  | -5.68449251 | 2.13384938  | -2.15049235 |
| C  | -4.20753517 | 4.02520535  | -1.85003206 |
| C  | -6.32885492 | 2.80520426  | -3.19059492 |
| H  | -5.99547329 | 1.13202840  | -1.87435662 |
| C  | -4.86090496 | 4.70114725  | -2.87867634 |

|   |             |            |             |
|---|-------------|------------|-------------|
| H | -3.37409643 | 4.48946469 | -1.32991095 |
| C | -5.92179394 | 4.09049137 | -3.55377791 |
| H | -7.14722023 | 2.32260879 | -3.71753909 |
| H | -4.54003817 | 5.70096897 | -3.15787762 |
| H | -6.42618908 | 4.61354972 | -4.36154334 |
| N | -4.45225270 | 1.56105482 | 0.71224414  |
| C | -5.87364057 | 1.64908003 | 0.98060159  |
| H | -6.01612439 | 1.86481904 | 2.04570750  |
| H | -6.41781158 | 2.40136022 | 0.39368164  |
| H | -6.32952817 | 0.66778629 | 0.79759106  |

**XYZ coordinates obtained for the reaction of 1' with W(CO)<sub>6</sub> at the B3LYP-D3/6-31G\*  
W ( LanL2DZ ) level of theory.**

**1'**

57

|    |             |             |             |
|----|-------------|-------------|-------------|
| Si | 1.65615400  | -0.46126400 | 0.15919200  |
| N  | 0.46116800  | 0.39864000  | -1.00773500 |
| C  | -1.14821900 | 2.11708300  | -0.13989000 |
| P  | 1.27743900  | -2.51965200 | 0.59126700  |
| Si | 3.80011100  | 0.41598300  | -0.24165800 |
| N  | 0.68857400  | 0.89501700  | 1.06526600  |
| C  | -1.02857900 | 3.44672700  | 0.28756500  |
| H  | -0.08078700 | 3.80615400  | 0.67694300  |
| C  | -2.12170700 | 4.30729500  | 0.19219700  |
| H  | -2.02475800 | 5.34008300  | 0.51400200  |
| C  | -3.33822700 | 3.84052800  | -0.31286900 |
| H  | -4.18997100 | 4.51152400  | -0.38007800 |
| C  | -3.46160100 | 2.51181500  | -0.72865000 |
| H  | -4.40898500 | 2.14581100  | -1.11402000 |
| C  | -2.36968900 | 1.64922400  | -0.64959700 |
| H  | -2.46454100 | 0.60946400  | -0.94677200 |
| C  | -0.01656700 | 1.17751200  | -0.03166900 |

|   |             |             |             |
|---|-------------|-------------|-------------|
| C | 0.03213400  | 0.35431200  | -2.38927100 |
| C | 4.33055600  | 0.00695400  | -2.01698100 |
| H | 5.32608200  | 0.41791300  | -2.22845800 |
| H | 3.63097200  | 0.42910100  | -2.74829200 |
| H | 4.36940300  | -1.07640300 | -2.17643000 |
| C | 0.56620100  | 1.49280600  | 2.37535300  |
| C | -0.58954300 | -2.32008900 | 0.37657000  |
| C | -1.19315900 | -2.55817000 | -0.88457800 |
| C | -2.55961700 | -2.30005900 | -1.06651800 |
| H | -3.00210400 | -2.47679500 | -2.04589800 |
| C | -3.37000700 | -1.82986400 | -0.03091700 |
| C | -2.78360700 | -1.66984100 | 1.22680100  |
| H | -3.40356500 | -1.34268200 | 2.06032100  |
| C | -1.42474800 | -1.91981100 | 1.45210500  |
| C | 5.05767400  | -0.29523700 | 0.98393800  |
| H | 6.06119400  | 0.10177700  | 0.78444500  |
| H | 5.10447000  | -1.38751500 | 0.90832000  |
| H | 4.79344100  | -0.04370200 | 2.01740500  |
| C | 3.67891500  | 2.30112200  | -0.03726600 |
| H | 4.62918700  | 2.78849700  | -0.28885400 |
| H | 3.42354700  | 2.57021700  | 0.99435900  |
| H | 2.90385800  | 2.71622500  | -0.69273200 |
| C | -0.40598300 | -3.10444200 | -2.05571000 |
| C | -4.82528400 | -1.49191800 | -0.25623900 |
| C | -0.89679300 | -1.78908900 | 2.86286400  |
| H | 1.00253400  | 0.81281200  | 3.11101900  |
| H | 1.10380700  | 2.44782600  | 2.43813000  |
| H | -0.48353800 | 1.66474500  | 2.63733900  |
| H | -0.80815400 | -0.33509600 | -2.52607100 |
| H | -0.26849200 | 1.34897000  | -2.73505300 |
| H | 0.86610900  | 0.00689600  | -3.00460600 |
| H | -1.67895900 | -1.43861300 | 3.54531800  |
| H | -0.52945800 | -2.75490900 | 3.23056700  |
| H | -0.04997600 | -1.10290800 | 2.92036100  |

|   |             |             |             |
|---|-------------|-------------|-------------|
| H | -1.05102400 | -3.24112400 | -2.93107200 |
| H | 0.42392400  | -2.44807000 | -2.33473000 |
| H | 0.04631400  | -4.07169200 | -1.80807600 |
| H | -5.45849000 | -1.87995100 | 0.55030900  |
| H | -4.97913100 | -0.40403000 | -0.28587500 |
| H | -5.19329200 | -1.90255400 | -1.20246700 |

**W(CO)6**

13

|   |             |             |             |
|---|-------------|-------------|-------------|
| C | -0.81154700 | -1.80693200 | 0.59750500  |
| C | -1.41182100 | 0.13532700  | -1.50599700 |
| C | -1.27703100 | 0.99812800  | 1.28581700  |
| C | 0.81066600  | 1.80727900  | -0.59674800 |
| O | -1.98813200 | 1.55365700  | 2.00059300  |
| O | 1.26236600  | 2.81259300  | -0.92913800 |
| O | -1.26385900 | -2.81182800 | 0.93032100  |
| O | -2.19703800 | 0.21061600  | -2.34442600 |
| W | -0.00010300 | -0.00005900 | 0.00008100  |
| C | 1.41299600  | -0.13546800 | 1.50503000  |
| O | 2.19950200  | -0.21085300 | 2.34224600  |
| C | 1.27678900  | -0.99844600 | -1.28549100 |
| O | 1.98807700  | -1.55355700 | -2.00043700 |

**W-int1**

68

|    |             |             |             |
|----|-------------|-------------|-------------|
| P  | -0.53170400 | -0.32342300 | 0.95038300  |
| Si | 0.72347000  | 1.40279000  | 0.57323700  |
| Si | -0.01635500 | 3.59395600  | 1.00915600  |
| N  | 2.42732900  | 1.01850000  | 1.16967500  |
| C  | 0.68888200  | -1.71638200 | 0.68016400  |
| C  | 1.03610200  | -2.47779200 | 1.83237500  |
| C  | 2.02512700  | -3.46179200 | 1.74427800  |
| H  | 2.28702800  | -4.02608400 | 2.63743300  |
| C  | 2.68811100  | -3.74292100 | 0.54443300  |
| C  | 2.30785200  | -3.02348300 | -0.58595700 |
| H  | 2.79366700  | -3.23483600 | -1.53749700 |



|   |             |             |             |
|---|-------------|-------------|-------------|
| C | 1.31738000  | -2.02906800 | -0.54905700 |
| C | 0.36631900  | -2.26068300 | 3.17438200  |
| C | 3.74751900  | -4.81737200 | 0.47254500  |
| C | 0.98889100  | -1.37499000 | -1.87378600 |
| C | -1.16534800 | 4.12506100  | -0.39974200 |
| H | -1.40726100 | 5.19100400  | -0.30203000 |
| H | -2.10430700 | 3.56424400  | -0.37640100 |
| H | -0.70655800 | 3.96960100  | -1.38235300 |
| C | 1.55368900  | 4.66103000  | 0.99965700  |
| H | 1.30305800  | 5.71410600  | 1.17850200  |
| H | 2.06616000  | 4.59719400  | 0.03231700  |
| H | 2.26009400  | 4.34469300  | 1.77559200  |
| C | -0.89860000 | 3.69510000  | 2.67714600  |
| H | -1.18860400 | 4.73228800  | 2.88843700  |
| H | -0.25780000 | 3.34941600  | 3.49618200  |
| H | -1.80785900 | 3.08543300  | 2.67190000  |
| N | 1.92630000  | 1.52770900  | -0.85349300 |
| C | 1.95917500  | 1.87930700  | -2.25830100 |
| C | 3.05655700  | 0.47186300  | 2.35569200  |
| C | 2.93419000  | 1.12936700  | -0.06788300 |
| C | 4.30781500  | 0.80553300  | -0.49040100 |
| C | 4.83866700  | -0.45738900 | -0.18108300 |
| H | 4.23469000  | -1.18242500 | 0.35479300  |
| C | 6.12261500  | -0.78993800 | -0.61055500 |
| H | 6.52731200  | -1.77163600 | -0.38264500 |
| C | 6.88254200  | 0.13382600  | -1.33366700 |
| H | 7.88447100  | -0.12698400 | -1.66227300 |
| C | 6.35500400  | 1.39167200  | -1.63964400 |
| H | 6.94551300  | 2.10950500  | -2.20099700 |
| C | 5.06585900  | 1.72717800  | -1.22759300 |
| H | 4.65253400  | 2.70378400  | -1.46064000 |
| H | 0.27510200  | -0.56096400 | -1.77503000 |
| H | 1.89569300  | -0.98381300 | -2.34806200 |
| H | 0.55695900  | -2.11384500 | -2.55803500 |

|               |             |             |             |
|---------------|-------------|-------------|-------------|
| H             | 4.33179400  | -4.86727400 | 1.39832600  |
| H             | 3.29657500  | -5.80708600 | 0.32132500  |
| H             | 4.43855300  | -4.64406600 | -0.35971600 |
| H             | 0.58109100  | -1.26693200 | 3.58292900  |
| H             | -0.72429500 | -2.33479400 | 3.09748200  |
| H             | 0.70596700  | -3.00861700 | 3.89879000  |
| H             | 2.62819500  | 0.95514500  | 3.23729700  |
| H             | 2.88439900  | -0.60774900 | 2.43068200  |
| H             | 4.13380300  | 0.66184900  | 2.33865200  |
| H             | 2.17298900  | 2.94675800  | -2.39608500 |
| H             | 2.72192700  | 1.30007800  | -2.78770100 |
| H             | 0.98286800  | 1.66421700  | -2.69644700 |
| C             | -2.00516300 | 0.77050800  | -1.84187800 |
| C             | -3.41618900 | 1.26498200  | 0.63303900  |
| C             | -4.57969200 | -0.51282700 | -1.32220000 |
| C             | -2.17591100 | -2.10848300 | -1.33644800 |
| O             | -5.60296200 | -0.57586800 | -1.87591400 |
| O             | -1.81985000 | -3.07767500 | -1.85839200 |
| O             | -1.49440500 | 1.44214300  | -2.64206100 |
| O             | -3.75894200 | 2.20697200  | 1.21856500  |
| C             | -3.45901800 | -1.57047600 | 1.18364700  |
| O             | -3.79097200 | -2.22256600 | 2.07943000  |
| W             | -2.81460000 | -0.40180800 | -0.38628700 |
| <b>CO</b>     |             |             |             |
| 2             |             |             |             |
| C             | 0.00000000  | 0.00000000  | -0.65022600 |
| O             | 0.00000000  | 0.00000000  | 0.48766900  |
| <b>W-ts1'</b> |             |             |             |
| 70            |             |             |             |
| P             | 0.57550700  | 0.21167500  | -0.38285700 |
| Si            | -1.61677900 | 1.47556100  | 0.21136300  |
| Si            | -1.71108900 | 3.57342900  | 1.29979200  |
| N             | -2.72942900 | 1.19539700  | -1.23432400 |
| C             | -0.24621900 | -1.13033600 | 0.71448400  |

|   |             |             |             |
|---|-------------|-------------|-------------|
| C | -0.89227500 | -2.21328000 | 0.07234100  |
| C | -1.39071600 | -3.26592600 | 0.85016900  |
| H | -1.88255900 | -4.10093400 | 0.35297000  |
| C | -1.25641600 | -3.28806800 | 2.24333900  |
| C | -0.63131200 | -2.20045900 | 2.85893400  |
| H | -0.52737300 | -2.19323000 | 3.94246900  |
| C | -0.13301900 | -1.11691500 | 2.12373900  |
| C | 0.06189200  | 4.18484900  | 1.53099700  |
| H | 0.07668300  | 5.08089000  | 2.16393400  |
| H | 0.51119200  | 4.43790500  | 0.56554700  |
| H | 0.69747100  | 3.42673800  | 2.00241300  |
| C | -2.52705600 | 3.25731100  | 2.98433900  |
| H | -2.55674500 | 4.18650900  | 3.56734500  |
| H | -1.97272700 | 2.51675400  | 3.57321000  |
| H | -3.55721400 | 2.90041200  | 2.87093700  |
| C | -2.74225000 | 4.79519300  | 0.28755100  |
| H | -2.82427200 | 5.75821600  | 0.80756400  |
| H | -3.75593900 | 4.41554300  | 0.11528000  |
| H | -2.27407300 | 4.96953000  | -0.68708400 |
| N | -3.00207000 | 0.37594600  | 0.73418000  |
| C | -3.53398200 | -0.25242700 | 1.92821700  |
| C | -2.60454500 | 1.26972600  | -2.68088200 |
| C | -3.48887200 | 0.34634500  | -0.51628300 |
| H | -2.81412900 | 2.28541200  | -3.02751100 |
| H | -1.58467100 | 1.00626000  | -2.97766400 |
| H | -3.29845500 | 0.57508900  | -3.15983100 |
| H | -4.61472100 | -0.39607400 | 1.83725200  |
| H | -3.05434200 | -1.21862400 | 2.10518700  |
| H | -3.33635600 | 0.39374100  | 2.78724700  |
| C | 3.25943700  | 1.02893500  | -2.04839200 |
| C | 2.74540300  | -1.79730900 | -1.70845200 |
| C | 5.14142600  | -0.54967300 | -0.51782300 |
| C | 3.03297200  | -1.53502000 | 1.15003700  |
| O | 6.29220100  | -0.72140300 | -0.56512700 |

|                |             |             |             |
|----------------|-------------|-------------|-------------|
| O              | 2.96595500  | -2.26384100 | 2.04699800  |
| O              | 3.30075300  | 1.74306100  | -2.95791900 |
| O              | 2.47018800  | -2.66726100 | -2.42343200 |
| C              | 0.29158100  | 1.81955000  | -1.02136800 |
| O              | -0.25006700 | 2.79739100  | -1.47599200 |
| W              | 3.16140100  | -0.24408100 | -0.43795600 |
| C              | 3.32070800  | 1.35293300  | 0.83861300  |
| O              | 3.33891500  | 2.25611900  | 1.56423500  |
| C              | -4.60217700 | -0.47968100 | -1.00158800 |
| C              | -4.67186500 | -1.83268500 | -0.62867200 |
| C              | -5.58672400 | 0.06963100  | -1.83879200 |
| C              | -5.71645800 | -2.62658800 | -1.09792500 |
| H              | -3.89382900 | -2.25906700 | -0.00295600 |
| C              | -6.63434600 | -0.72880300 | -2.29403400 |
| H              | -5.53676900 | 1.11907600  | -2.11258300 |
| C              | -6.69879900 | -2.07625800 | -1.92656400 |
| H              | -5.76210500 | -3.67526000 | -0.81961600 |
| H              | -7.39972500 | -0.30045200 | -2.93414000 |
| H              | -7.51383500 | -2.69713900 | -2.28700500 |
| C              | -1.75127200 | -4.46351500 | 3.05221800  |
| C              | 0.48865100  | 0.04105300  | 2.87439500  |
| C              | -1.05867200 | -2.27826400 | -1.43247100 |
| H              | -0.14497300 | 0.93741400  | 2.83178800  |
| H              | 0.63078800  | -0.20890400 | 3.93006500  |
| H              | 1.45643700  | 0.32921700  | 2.45820200  |
| H              | -2.62554900 | -4.93223200 | 2.58695500  |
| H              | -0.97494700 | -5.23553600 | 3.13562400  |
| H              | -2.02365400 | -4.16547400 | 4.07038400  |
| H              | -1.68537800 | -3.12988100 | -1.71658100 |
| H              | -1.52409700 | -1.37041200 | -1.83039400 |
| H              | -0.09389700 | -2.38835000 | -1.93943600 |
| <b>W-int2'</b> |             |             |             |
| 70             |             |             |             |
| P              | -0.65577100 | -0.37606000 | 0.32622200  |

|    |             |             |             |
|----|-------------|-------------|-------------|
| Si | 1.98864200  | 1.55226300  | -0.16244800 |
| Si | 2.22690200  | 3.69103700  | -1.10832300 |
| N  | 2.91194100  | 1.20404000  | 1.37692000  |
| C  | 0.08663800  | -1.28361500 | -1.10398900 |
| C  | 0.71262900  | -2.53019700 | -0.84787000 |
| C  | 1.21870800  | -3.28211500 | -1.91272600 |
| H  | 1.69180300  | -4.23983900 | -1.70403300 |
| C  | 1.13451600  | -2.84032200 | -3.23616200 |
| C  | 0.51491700  | -1.61225100 | -3.47701400 |
| H  | 0.42577000  | -1.25811600 | -4.50209500 |
| C  | -0.01885500 | -0.82880900 | -2.44309200 |
| C  | 0.85634500  | -3.07986900 | 0.55638200  |
| C  | 1.71903400  | -3.65706500 | -4.36429500 |
| C  | -0.72522600 | 0.45493100  | -2.82005200 |
| C  | 0.64504500  | 4.06028300  | -2.07301000 |
| H  | 0.61886500  | 5.11715200  | -2.36613800 |
| H  | -0.24103400 | 3.85207900  | -1.46340800 |
| H  | 0.57922700  | 3.45771800  | -2.98573000 |
| C  | 3.74687900  | 3.66861300  | -2.23792000 |
| H  | 3.90304800  | 4.65550200  | -2.69086200 |
| H  | 3.62850300  | 2.94246200  | -3.05064300 |
| H  | 4.65451800  | 3.40779400  | -1.68105700 |
| C  | 2.45537800  | 4.90964700  | 0.32062700  |
| H  | 2.53758900  | 5.93485100  | -0.06190700 |
| H  | 3.36124300  | 4.69147500  | 0.89822900  |
| H  | 1.59587600  | 4.86409400  | 0.99777100  |
| N  | 3.24325700  | 0.25205200  | -0.51896800 |
| C  | 3.59902600  | -0.67699100 | -1.57658200 |
| C  | 2.88075600  | 1.61115600  | 2.76797600  |
| C  | 3.60139400  | 0.22061600  | 0.77873200  |
| C  | 4.50602000  | -0.74780500 | 1.41369000  |
| C  | 4.11667300  | -1.38595100 | 2.60322300  |
| H  | 3.15317000  | -1.16029000 | 3.04876500  |
| C  | 4.95451500  | -2.33455100 | 3.18704400  |

|   |             |             |             |
|---|-------------|-------------|-------------|
| H | 4.64606900  | -2.83597400 | 4.09920500  |
| C | 6.18453800  | -2.63961600 | 2.59771400  |
| H | 6.83769300  | -3.37520000 | 3.05796700  |
| C | 6.57534400  | -2.00389000 | 1.41547500  |
| H | 7.53175100  | -2.24033700 | 0.95912200  |
| C | 5.73622500  | -1.06623600 | 0.81683500  |
| H | 6.03806300  | -0.56824900 | -0.09906300 |
| H | -0.36162100 | 1.32174300  | -2.26361100 |
| H | -0.60663300 | 0.66397700  | -3.88790900 |
| H | -1.79659200 | 0.38680400  | -2.61015400 |
| H | 1.56295000  | -4.72947300 | -4.20315000 |
| H | 1.27322800  | -3.38881600 | -5.32764700 |
| H | 2.80270400  | -3.49735000 | -4.44765300 |
| H | 1.47138500  | -2.42247600 | 1.18243700  |
| H | -0.11284000 | -3.17666900 | 1.05892800  |
| H | 1.32707000  | -4.06833700 | 0.53934800  |
| H | 2.80938100  | 2.70038600  | 2.81796500  |
| H | 2.00961600  | 1.18588200  | 3.27888100  |
| H | 3.79117200  | 1.29066500  | 3.28134200  |
| H | 4.50378200  | -0.34922200 | -2.10173400 |
| H | 3.76139900  | -1.68075500 | -1.17552700 |
| H | 2.77371800  | -0.72653700 | -2.28839500 |
| C | -3.01483100 | 1.62718200  | -0.46543900 |
| C | -2.92154900 | 0.83769900  | 2.30193900  |
| C | -5.22006700 | 0.06114100  | 0.69530800  |
| C | -3.24096800 | -1.95081000 | 1.52080200  |
| O | -6.37419400 | 0.19459600  | 0.78317300  |
| O | -3.20795100 | -2.96612700 | 2.07890400  |
| O | -2.83769200 | 2.62044200  | -1.03367900 |
| O | -2.74704800 | 1.38584300  | 3.30551300  |
| C | 0.20841400  | 1.15836600  | 0.32191500  |
| O | -0.07067300 | 2.22043400  | 0.93920300  |
| W | -3.23561300 | -0.15692100 | 0.52690300  |
| C | -3.44592500 | -1.16603100 | -1.24201100 |

O -3.53699400 -1.73540800 -2.24727000

**W-int2**

123

C -5.45680700 -1.68861600 -1.42567600

N -4.93357300 -0.93000900 -0.30384300

C 5.35650000 -0.57090000 -2.19352100

Si -3.45286300 -0.96306600 0.83845800

C -5.60315700 -0.13903000 0.53981800

N 4.93516800 -0.41240300 -0.81377300

Si 3.66471900 -1.12109200 0.36140800

N -4.81613200 0.04252100 1.61084400

C 5.63822100 0.09245800 0.20294700

C -4.89973900 1.12904900 2.57230700

N 5.01653800 -0.27980500 1.33109900

C 5.16589400 0.34157500 2.63588900

C -6.93942500 0.44595100 0.32720400

C -7.96522200 0.22292200 1.25672400

C -7.17152900 1.24448100 -0.80226900

C -9.22347900 0.78676700 1.04734700

H -7.77563100 -0.39954300 2.12651500

C -8.42923700 1.81322100 -0.99929900

H -6.35900700 1.44129100 -1.49424100

C -9.45567800 1.58150500 -0.07906500

H -10.02103700 0.60697600 1.76224200

H -8.60657800 2.43987800 -1.86839900

H -10.43546200 2.02294000 -0.23765300

C 6.84788200 0.93085500 0.10772400

C 8.04546500 0.51946100 0.70895500

C 6.78302800 2.15548800 -0.57270300

C 9.17896700 1.32687600 0.61616300

H 8.08574200 -0.43261000 1.23047500

C 7.91781900 2.96198100 -0.65223500

H 5.84007500 2.48082700 -1.00066600

C 9.11569200 2.54697600 -0.06327100

|   |             |             |             |
|---|-------------|-------------|-------------|
| H | 10.10972400 | 1.00472500  | 1.07381100  |
| H | 7.86577600  | 3.91493200  | -1.17062600 |
| H | 9.99904500  | 3.17558900  | -0.13070500 |
| H | -4.42877600 | 0.81183300  | 3.50592600  |
| H | -4.38110000 | 2.01889600  | 2.19825700  |
| H | -5.94336600 | 1.38475300  | 2.77464300  |
| H | -4.62569900 | -1.94622800 | -2.08570600 |
| H | -5.93771600 | -2.61551500 | -1.08756400 |
| H | -6.18805800 | -1.10108100 | -1.98734300 |
| H | 4.47190000  | -0.77551500 | -2.79893100 |
| H | 5.84285900  | 0.33712300  | -2.56098500 |
| H | 6.05520400  | -1.41069900 | -2.30088700 |
| H | 6.22156800  | 0.51634600  | 2.86246000  |
| H | 4.62840200  | 1.29542600  | 2.68020300  |
| H | 4.75258600  | -0.33013000 | 3.39157000  |
| P | -1.68017600 | 0.20732200  | 0.44744800  |
| P | 1.73583300  | -0.18370700 | 0.63809200  |
| C | 1.44090000  | -1.68023600 | -2.39662100 |
| C | 0.09508000  | -2.75744200 | -0.10654000 |
| C | -0.11335900 | 0.68076900  | -2.27235800 |
| O | 0.17435000  | -3.75402200 | 0.50078600  |
| O | 2.32220500  | -1.98196900 | -3.11946300 |
| O | -0.21659800 | 1.65110300  | -2.90311000 |
| C | 2.29595700  | 1.60320800  | 0.72061300  |
| C | 2.21948500  | 2.23742000  | 1.99349500  |
| C | 2.80523500  | 2.34846900  | -0.37203600 |
| C | 2.66786400  | 3.55403200  | 2.14603700  |
| C | 3.25206300  | 3.66303500  | -0.16568000 |
| C | 3.20306400  | 4.28409200  | 1.08055100  |
| H | 2.59912200  | 4.02289700  | 3.12620100  |
| H | 3.64193100  | 4.21785000  | -1.01876700 |
| C | -2.50568900 | 1.79873500  | -0.12950700 |
| C | -2.37162300 | 2.93141700  | 0.72401100  |
| C | -3.27671000 | 1.94350800  | -1.31042300 |



|    |             |             |             |
|----|-------------|-------------|-------------|
| C  | -3.04882800 | 4.11808600  | 0.42624400  |
| C  | -3.94419800 | 3.15326900  | -1.56139200 |
| C  | -3.85783400 | 4.24840900  | -0.70643600 |
| H  | -2.94190400 | 4.96683300  | 1.09971000  |
| H  | -4.54194700 | 3.23594900  | -2.46870200 |
| C  | 1.67073500  | 1.52984700  | 3.21709200  |
| C  | 3.72951700  | 5.68579600  | 1.28078900  |
| C  | 2.88608500  | 1.83363700  | -1.79385500 |
| C  | -1.49006000 | 2.91432000  | 1.95474800  |
| C  | -3.40114400 | 0.88482800  | -2.38264900 |
| C  | -4.57370100 | 5.54399200  | -1.00759800 |
| H  | -1.53647600 | 3.87645600  | 2.47687800  |
| H  | -1.77407200 | 2.12466500  | 2.65762800  |
| H  | -0.44485900 | 2.73273900  | 1.68327000  |
| H  | -5.40719100 | 5.39025700  | -1.70159800 |
| H  | -4.97090200 | 6.00404300  | -0.09524000 |
| H  | -3.89461200 | 6.27442300  | -1.46748500 |
| H  | -4.43665100 | 0.78852700  | -2.72919700 |
| H  | -2.79327800 | 1.16319900  | -3.25144500 |
| H  | -3.05915500 | -0.08873400 | -2.05118400 |
| H  | 1.59203400  | 2.22668000  | 4.05925300  |
| H  | 0.68176800  | 1.10124600  | 3.02879300  |
| H  | 2.31276100  | 0.69624800  | 3.52362400  |
| H  | 3.16713800  | 6.21903200  | 2.05541600  |
| H  | 4.78201700  | 5.67208100  | 1.59606100  |
| H  | 3.67422600  | 6.27149800  | 0.35665800  |
| H  | 3.88962900  | 1.98511200  | -2.20867500 |
| H  | 2.64089100  | 0.77709800  | -1.87309600 |
| H  | 2.18710100  | 2.38318400  | -2.43314300 |
| Si | -3.38790400 | -3.12538400 | 1.76164000  |
| Si | 4.01740200  | -3.44805600 | 0.47218400  |
| C  | 5.90965200  | -3.63868400 | 0.48911200  |
| C  | 3.30279800  | -4.35832900 | -1.02168100 |
| C  | 3.27140200  | -4.10774800 | 2.08235300  |

|   |             |             |             |
|---|-------------|-------------|-------------|
| C | -2.00886100 | -3.27608100 | 3.04590500  |
| C | -5.08336300 | -3.36715100 | 2.58760000  |
| C | -3.20316100 | -4.37869900 | 0.35328900  |
| H | 3.63256700  | -5.40528600 | -1.00828700 |
| H | 2.20973200  | -4.34334900 | -1.00194700 |
| H | 3.62139800  | -3.90429900 | -1.96480000 |
| H | 6.35028100  | -3.27142400 | -0.44572800 |
| H | 6.36028900  | -3.07761000 | 1.31590300  |
| H | 6.19122700  | -4.69343600 | 0.59949600  |
| H | 3.48379100  | -5.17915000 | 2.19114700  |
| H | 3.67851900  | -3.59080700 | 2.95913100  |
| H | 2.18463800  | -3.97512400 | 2.07832700  |
| H | -2.14662800 | -2.55199900 | 3.85719300  |
| H | -2.00750800 | -4.28222000 | 3.48461100  |
| H | -1.02811700 | -3.10340000 | 2.59420600  |
| H | -5.23133800 | -2.65813300 | 3.41002200  |
| H | -5.89789500 | -3.21928500 | 1.86791200  |
| H | -5.17482200 | -4.38285600 | 2.99280100  |
| H | -2.29049600 | -4.20897600 | -0.22367600 |
| H | -3.16629900 | -5.39914300 | 0.75556700  |
| H | -4.05403700 | -4.31843100 | -0.33531900 |
| W | 0.00597400  | -1.05804700 | -1.20181700 |
| C | -1.41011400 | -1.88573800 | -2.29370400 |
| O | -2.27015300 | -2.40982700 | -2.90507500 |

### W-int3

127

|    |             |             |             |
|----|-------------|-------------|-------------|
| C  | -6.10748800 | 0.56742100  | -0.35425500 |
| N  | -5.01063900 | 0.22745600  | 0.53297700  |
| O  | -0.54814300 | -2.52474000 | 2.97851600  |
| C  | 5.58498800  | -0.88546300 | -1.51691500 |
| Si | -3.55477300 | -0.92615700 | 0.66688400  |
| C  | -4.74025700 | 0.75134900  | 1.73071500  |
| N  | 4.86130200  | -0.37071000 | -0.36833200 |
| Si | 3.39599800  | -0.84707600 | 0.69637400  |

|   |             |             |             |
|---|-------------|-------------|-------------|
| N | -3.78430600 | -0.01076700 | 2.29188800  |
| C | -1.28372300 | -2.07906300 | 2.23597100  |
| C | 5.31259700  | 0.45843100  | 0.57568800  |
| C | -2.85951100 | 0.41175400  | 3.33106100  |
| N | 4.47644800  | 0.35582200  | 1.62000000  |
| C | 4.29936800  | 1.34084700  | 2.67398600  |
| C | -5.31217400 | 1.99627700  | 2.27231000  |
| C | -5.79184300 | 2.06362100  | 3.58832200  |
| C | -5.33557700 | 3.13720600  | 1.45277100  |
| C | -6.30406300 | 3.26463000  | 4.07782700  |
| H | -5.77386600 | 1.17551500  | 4.21311400  |
| C | -5.83833400 | 4.33683100  | 1.95388600  |
| H | -4.93921100 | 3.08176100  | 0.44234800  |
| C | -6.32578000 | 4.40036100  | 3.26268700  |
| H | -6.68498100 | 3.31488000  | 5.09355800  |
| H | -5.84737000 | 5.22147100  | 1.32407300  |
| H | -6.72100000 | 5.33573000  | 3.64861000  |
| C | 6.48875800  | 1.34284300  | 0.48185000  |
| C | 7.52590600  | 1.24400500  | 1.41989200  |
| C | 6.55227800  | 2.29754400  | -0.54356800 |
| C | 8.63011900  | 2.09038000  | 1.32209400  |
| H | 7.46777000  | 0.49842900  | 2.20774300  |
| C | 7.65491300  | 3.14684400  | -0.62893800 |
| H | 5.72538800  | 2.38936400  | -1.24070300 |
| C | 8.69494200  | 3.04103300  | 0.29914300  |
| H | 9.43838000  | 2.00847800  | 2.04288900  |
| H | 7.70041300  | 3.89260800  | -1.41714800 |
| H | 9.55457500  | 3.70125100  | 0.22727200  |
| H | -1.86987900 | 0.59145400  | 2.89610700  |
| H | -3.20239800 | 1.33254500  | 3.80956000  |
| H | -2.77041900 | -0.36745800 | 4.09417800  |
| H | -6.57615200 | -0.35009700 | -0.72068000 |
| H | -6.86033100 | 1.15434500  | 0.17881600  |
| H | -5.74581300 | 1.13944200  | -1.21329200 |

|   |             |             |             |
|---|-------------|-------------|-------------|
| H | 4.85949700  | -1.25547300 | -2.24294900 |
| H | 6.19116200  | -0.10155500 | -1.97916300 |
| H | 6.24472200  | -1.71431200 | -1.22897300 |
| H | 5.26169700  | 1.77465400  | 2.95958000  |
| H | 3.63061100  | 2.14473700  | 2.34569000  |
| H | 3.86013700  | 0.84800000  | 3.54310300  |
| P | -1.85678900 | -0.01198100 | -0.39326600 |
| P | 1.41111200  | -0.06159800 | 0.32712900  |
| C | 1.77093400  | -2.13376900 | -2.30046500 |
| C | 0.12771700  | -3.06556100 | -0.24660700 |
| C | 0.00629900  | 0.03733600  | -2.87542500 |
| O | 0.17886500  | -4.03339100 | 0.41291500  |
| O | 2.79518000  | -2.46958800 | -2.77815300 |
| O | -0.06236700 | 0.87242800  | -3.67866200 |
| C | 1.87374800  | 1.71805000  | -0.06775600 |
| C | 1.46501100  | 2.71362100  | 0.86411700  |
| C | 2.60718700  | 2.13555000  | -1.20811100 |
| C | 1.84237400  | 4.04795000  | 0.67997300  |
| C | 2.97024900  | 3.48491100  | -1.34364100 |
| C | 2.61739600  | 4.45566100  | -0.40910300 |
| H | 1.51761500  | 4.79097900  | 1.40647300  |
| H | 3.53864100  | 3.78100600  | -2.22495900 |
| C | -2.82308200 | 1.04029400  | -1.61285400 |
| C | -2.68410500 | 2.45068400  | -1.52107100 |
| C | -3.64492600 | 0.51538000  | -2.64103000 |
| C | -3.35568700 | 3.27954700  | -2.42858900 |
| C | -4.28379900 | 1.38123800  | -3.53990400 |
| C | -4.15457300 | 2.76763700  | -3.45416000 |
| H | -3.23723500 | 4.35837100  | -2.34018000 |
| H | -4.90724600 | 0.95479600  | -4.32416500 |
| C | 0.60100800  | 2.38464600  | 2.06263600  |
| C | 3.06357300  | 5.89073200  | -0.55988500 |
| C | 3.00707500  | 1.23035000  | -2.35366000 |
| C | -1.81348500 | 3.10728500  | -0.47272500 |

|    |             |             |             |
|----|-------------|-------------|-------------|
| C  | -3.92646800 | -0.96142100 | -2.77401400 |
| C  | -4.82540300 | 3.68182000  | -4.45225800 |
| H  | -1.85264000 | 4.19868500  | -0.56241900 |
| H  | -2.12012300 | 2.83383500  | 0.54266400  |
| H  | -0.76775000 | 2.80164800  | -0.57409800 |
| H  | -5.73059700 | 3.22723800  | -4.87003500 |
| H  | -5.10323000 | 4.63943400  | -3.99709800 |
| H  | -4.15615500 | 3.90571900  | -5.29384400 |
| H  | -4.29697300 | -1.20806400 | -3.77439000 |
| H  | -3.04106600 | -1.56079900 | -2.57249800 |
| H  | -4.70134000 | -1.28119100 | -2.06191500 |
| H  | 0.20468700  | 3.30123700  | 2.51417900  |
| H  | -0.23866200 | 1.74280700  | 1.77789600  |
| H  | 1.16459000  | 1.84865600  | 2.83248100  |
| H  | 2.32914700  | 6.58629900  | -0.13858300 |
| H  | 4.01377700  | 6.06643700  | -0.03681300 |
| H  | 3.21783200  | 6.15504000  | -1.61181000 |
| H  | 4.06746600  | 1.35440300  | -2.60201300 |
| H  | 2.82592600  | 0.18040700  | -2.14710500 |
| H  | 2.43310200  | 1.49153300  | -3.24964800 |
| Si | -4.33824900 | -3.15554200 | 0.78443100  |
| Si | 3.85481900  | -3.05301400 | 1.38865900  |
| C  | 5.66598100  | -2.99035500 | 1.96720400  |
| C  | 3.69084000  | -4.23489400 | -0.07922300 |
| C  | 2.73701700  | -3.60539000 | 2.80887100  |
| C  | -4.37622000 | -3.72409400 | 2.59589000  |
| C  | -6.11426100 | -3.14849900 | 0.10782500  |
| C  | -3.25676300 | -4.30149600 | -0.25607900 |
| H  | 4.10089900  | -5.21746700 | 0.18812100  |
| H  | 2.64011900  | -4.36612600 | -0.35251300 |
| H  | 4.21737400  | -3.86956100 | -0.96651400 |
| H  | 6.33227900  | -2.66816400 | 1.15780100  |
| H  | 5.79239100  | -2.29219800 | 2.80265600  |
| H  | 5.99803400  | -3.98225500 | 2.29873600  |

|   |             |             |             |
|---|-------------|-------------|-------------|
| H | 3.05077400  | -4.59356200 | 3.16926500  |
| H | 2.77545500  | -2.90514200 | 3.64982100  |
| H | 1.69914400  | -3.68133100 | 2.47240700  |
| H | -4.96684600 | -3.03820300 | 3.21412600  |
| H | -4.82552200 | -4.72253800 | 2.67127800  |
| H | -3.36902200 | -3.78075500 | 3.02310500  |
| H | -6.76045100 | -2.46738700 | 0.67343800  |
| H | -6.14287600 | -2.85082500 | -0.94666100 |
| H | -6.54410100 | -4.15592200 | 0.17686900  |
| H | -2.26526000 | -4.42586100 | 0.18830300  |
| H | -3.72424500 | -5.29231200 | -0.32594000 |
| H | -3.11267800 | -3.91921500 | -1.27196900 |
| C | 1.54571500  | -0.46799400 | 4.11638300  |
| O | 0.49778000  | -0.20934100 | 4.47910100  |
| W | 0.09249100  | -1.48930500 | -1.50672300 |
| C | -0.94982400 | -2.64238300 | -2.72308400 |
| O | -1.52856600 | -3.37947900 | -3.43370700 |

**W-ts1**

127

|    |             |             |             |
|----|-------------|-------------|-------------|
| N  | 4.58984100  | 0.85140300  | -0.52052900 |
| O  | 1.52352400  | -2.40245800 | -2.79390700 |
| Si | 3.19224400  | -0.51178300 | -0.90336100 |
| C  | 4.33155200  | 1.43237200  | -1.67717900 |
| N  | -4.85896300 | -0.65333400 | -0.24592600 |
| Si | -3.24715500 | -0.83180200 | -1.12780900 |
| N  | 3.34211400  | 0.73783100  | -2.27616400 |
| C  | 1.67195200  | -1.49499300 | -2.08469900 |
| C  | -5.14982300 | 0.45398500  | -0.94700000 |
| N  | -4.16584400 | 0.59156400  | -1.85038400 |
| P  | 1.68451200  | -0.02601600 | 0.64469600  |
| P  | -1.40693300 | -0.07628800 | -0.17630800 |
| C  | -1.91030900 | -2.62172100 | 1.87757100  |
| C  | 0.03794500  | -3.14210500 | -0.06188500 |
| C  | -0.36074600 | -0.46871600 | 2.97890400  |

|    |             |             |             |
|----|-------------|-------------|-------------|
| O  | 0.16504800  | -4.02995000 | -0.81231000 |
| O  | -2.96100700 | -3.09297000 | 2.13340800  |
| O  | -0.42112000 | 0.22812200  | 3.90553200  |
| C  | -2.00071400 | 1.60103000  | 0.42188900  |
| C  | -1.55074300 | 2.77664600  | -0.23884800 |
| C  | -2.90306100 | 1.73963300  | 1.50827800  |
| C  | -2.05050600 | 4.02526600  | 0.14997500  |
| C  | -3.37482000 | 3.01363700  | 1.85531000  |
| C  | -2.97549400 | 4.16887100  | 1.18691000  |
| H  | -1.69968800 | 4.91331300  | -0.37212500 |
| H  | -4.08320900 | 3.09515200  | 2.67823200  |
| Si | 4.64172900  | -2.34386300 | -1.36197900 |
| Si | -3.31647700 | -2.83494600 | -2.36933300 |
| W  | -0.21474500 | -1.74962100 | 1.38652100  |
| C  | 0.83801800  | -2.96381400 | 2.55777800  |
| O  | 1.42352000  | -3.69955400 | 3.25515500  |
| C  | -0.12373900 | -0.28529100 | -2.23395700 |
| O  | -0.54032400 | 0.14197700  | -3.23989400 |
| C  | 2.62025100  | 0.55325200  | 2.14535000  |
| C  | 2.31319300  | 1.84812400  | 2.64235100  |
| C  | 3.54255700  | -0.24314500 | 2.86578700  |
| C  | 2.94286400  | 2.31425500  | 3.80198400  |
| C  | 4.14565000  | 0.26196600  | 4.02459800  |
| C  | 3.86408100  | 1.53887900  | 4.51112300  |
| H  | 2.70083100  | 3.31144300  | 4.16631600  |
| H  | 4.85683900  | -0.36461800 | 4.56092100  |
| C  | 3.94904500  | -1.62145700 | 2.40565000  |
| C  | 1.30695700  | 2.75284600  | 1.96384700  |
| C  | 4.50102400  | 2.05258800  | 5.78129700  |
| C  | -3.39739300 | 0.60024100  | 2.37240300  |
| C  | -3.50310600 | 5.52482500  | 1.59222000  |
| C  | -0.52675400 | 2.75112200  | -1.35107400 |
| C  | 3.89642500  | -3.93312300 | -0.65017500 |
| C  | 6.38246800  | -2.03606400 | -0.66274600 |

|   |             |             |             |
|---|-------------|-------------|-------------|
| C | 4.84075400  | -2.50921900 | -3.24734800 |
| C | -3.37726600 | -4.26143000 | -1.12962700 |
| C | -1.84645600 | -3.00233000 | -3.54107600 |
| C | -4.94532900 | -2.73035900 | -3.33932700 |
| C | -3.90587100 | 1.70181300  | -2.74606900 |
| C | -5.64618400 | -1.32497200 | 0.77080100  |
| C | 5.39779100  | 1.38970000  | 0.55806200  |
| C | 2.96786200  | 0.79412400  | -3.67886700 |
| C | 4.97164100  | 2.64461500  | -2.23481400 |
| C | 4.17948600  | 3.74686700  | -2.58805800 |
| C | 6.36158200  | 2.69856000  | -2.41062300 |
| C | 4.77674100  | 4.89653800  | -3.10471800 |
| H | 3.10386500  | 3.69912500  | -2.44334000 |
| C | 6.95311400  | 3.84767600  | -2.93531500 |
| H | 6.96921100  | 1.83728500  | -2.14810300 |
| C | 6.16249300  | 4.94755900  | -3.27987600 |
| H | 4.16150300  | 5.75148100  | -3.36996100 |
| H | 8.02948800  | 3.88404500  | -3.07590000 |
| H | 6.62569700  | 5.84272200  | -3.68512800 |
| C | -6.27263500 | 1.37664800  | -0.71486200 |
| C | -6.00381400 | 2.74249400  | -0.52745700 |
| C | -7.58990100 | 0.90053900  | -0.63579800 |
| C | -7.05211600 | 3.62189900  | -0.26219300 |
| H | -4.98090400 | 3.10236300  | -0.54630800 |
| C | -8.63400600 | 1.79026000  | -0.38599900 |
| H | -7.79465400 | -0.15507800 | -0.78516000 |
| C | -8.36588600 | 3.14906700  | -0.19675200 |
| H | -6.84094800 | 4.67518200  | -0.10241000 |
| H | -9.65455500 | 1.42280600  | -0.33553400 |
| H | -9.18074400 | 3.83818800  | 0.00570400  |
| H | 7.05398800  | -2.84986400 | -0.96598400 |
| H | 6.79093300  | -1.09653800 | -1.05292300 |
| H | 6.40041600  | -1.98133900 | 0.43029400  |
| H | 5.51594500  | -3.34191300 | -3.48355400 |



|   |             |             |             |
|---|-------------|-------------|-------------|
| H | 3.88324500  | -2.70314300 | -3.74072100 |
| H | 5.27207100  | -1.59829200 | -3.68028300 |
| H | 3.83542000  | -3.88869700 | 0.44252400  |
| H | 2.88305700  | -4.10000500 | -1.03099400 |
| H | 4.50885400  | -4.80256200 | -0.92143200 |
| H | -2.42354900 | -4.36508600 | -0.60532500 |
| H | -4.15775400 | -4.11907700 | -0.37464000 |
| H | -3.58004700 | -5.20139700 | -1.65874900 |
| H | -1.98692000 | -3.88967500 | -4.17161800 |
| H | -1.73899700 | -2.13178200 | -4.19616200 |
| H | -0.91122600 | -3.13132400 | -2.98861800 |
| H | -5.80115200 | -2.60008900 | -2.66638900 |
| H | -4.94035900 | -1.89125400 | -4.04427000 |
| H | -5.10588400 | -3.65254800 | -3.91185400 |
| H | 1.56641000  | 2.93635500  | 0.91592400  |
| H | 0.30538800  | 2.30980400  | 1.96061500  |
| H | 1.24273800  | 3.71771400  | 2.47926500  |
| H | 4.64830700  | 3.13820600  | 5.74632700  |
| H | 3.86967200  | 1.83967700  | 6.65461000  |
| H | 5.47413000  | 1.58254000  | 5.96220400  |
| H | 4.77064700  | -1.56231100 | 1.68231900  |
| H | 4.29812900  | -2.23350500 | 3.24375500  |
| H | 3.12377200  | -2.14050200 | 1.91751700  |
| H | 6.12291600  | 2.11992300  | 0.18664500  |
| H | 4.76636900  | 1.86553500  | 1.31442800  |
| H | 5.94030900  | 0.57249800  | 1.04038600  |
| H | 3.43925800  | 1.65100000  | -4.16701300 |
| H | 3.28141400  | -0.11556300 | -4.20512200 |
| H | 1.88330600  | 0.89189200  | -3.77901400 |
| H | -4.97082200 | -1.88447100 | 1.42063500  |
| H | -6.20414500 | -0.59998700 | 1.37061600  |
| H | -6.35609500 | -2.02773000 | 0.31751700  |
| H | -3.28481500 | 1.34245800  | -3.56991100 |
| H | -4.84340700 | 2.09678500  | -3.14894300 |

|   |             |             |             |
|---|-------------|-------------|-------------|
| H | -3.36927400 | 2.50798800  | -2.23432700 |
| H | -2.93494400 | 0.65930500  | 3.36363200  |
| H | -4.48125500 | 0.66922500  | 2.51387400  |
| H | -3.16114500 | -0.38042700 | 1.97015300  |
| H | -3.36139400 | 6.26566600  | 0.79817900  |
| H | -4.57205600 | 5.48005600  | 1.83192800  |
| H | -2.98798200 | 5.89855100  | 2.48677000  |
| H | -0.93429900 | 2.32931800  | -2.27469600 |
| H | -0.18186600 | 3.76679000  | -1.57336900 |
| H | 0.34281400  | 2.14585200  | -1.07235300 |

#### W-int4

127

|    |             |             |             |
|----|-------------|-------------|-------------|
| C  | -2.50083100 | 2.54933600  | 2.27004700  |
| N  | -3.02253500 | 1.25341700  | 1.83674600  |
| O  | 1.94330100  | -0.78529400 | 2.20144600  |
| C  | 5.74453100  | 0.07755800  | -1.14020900 |
| Si | -2.10375100 | -0.27540500 | 1.60476800  |
| C  | -4.36813800 | 1.07624300  | 1.57648600  |
| N  | 4.79724200  | 0.22292200  | -0.04977800 |
| Si | 3.38529600  | -0.70361700 | 1.04890000  |
| N  | -4.73440000 | -0.11678100 | 1.25504900  |
| C  | 0.95603400  | -0.24933000 | 1.47676300  |
| C  | 4.83242100  | 1.18003800  | 0.85932900  |
| C  | -6.11675800 | -0.43701600 | 0.96250100  |
| N  | 3.95603300  | 0.84262600  | 1.83001500  |
| C  | 3.50736000  | 1.65639000  | 2.94883400  |
| C  | -5.27786800 | 2.26346800  | 1.64602000  |
| C  | -5.55730300 | 2.97745800  | 0.47351000  |
| C  | -5.87890500 | 2.64332100  | 2.85247600  |
| C  | -6.42526100 | 4.07010600  | 0.51293400  |
| H  | -5.10091900 | 2.66788000  | -0.46287800 |
| C  | -6.74842300 | 3.73534200  | 2.88734200  |
| H  | -5.66480400 | 2.08145700  | 3.75799700  |
| C  | -7.02055300 | 4.45151200  | 1.71849200  |

|   |             |             |             |
|---|-------------|-------------|-------------|
| H | -6.63926000 | 4.62110100  | -0.39910100 |
| H | -7.21358000 | 4.02544800  | 3.82555500  |
| H | -7.69725100 | 5.30127500  | 1.74693000  |
| C | 5.63845200  | 2.41459300  | 0.82933200  |
| C | 6.38771900  | 2.81235700  | 1.94630500  |
| C | 5.62227400  | 3.21230800  | -0.32540400 |
| C | 7.12952400  | 3.99221700  | 1.90032400  |
| H | 6.39875700  | 2.19252800  | 2.83760000  |
| C | 6.35272700  | 4.39892100  | -0.35839100 |
| H | 5.01315000  | 2.91727400  | -1.17316800 |
| C | 7.11035200  | 4.78708200  | 0.75049900  |
| H | 7.71836900  | 4.29306400  | 2.76179300  |
| H | 6.32938300  | 5.02039600  | -1.24904400 |
| H | 7.68306100  | 5.70967800  | 0.72047500  |
| H | -6.34950800 | -1.42333300 | 1.38084500  |
| H | -6.83936900 | 0.28612800  | 1.36457500  |
| H | -6.26817200 | -0.49728800 | -0.12293300 |
| H | -2.45770400 | 3.27256500  | 1.44486900  |
| H | -3.12498600 | 2.97852200  | 3.05966000  |
| H | -1.50067900 | 2.40995500  | 2.67675500  |
| H | 5.71224000  | -0.95222000 | -1.49872600 |
| H | 5.49665000  | 0.73479200  | -1.98009000 |
| H | 6.76706000  | 0.30327200  | -0.81531800 |
| H | 2.51266300  | 1.31848700  | 3.24822900  |
| H | 4.17654200  | 1.55247100  | 3.81096400  |
| H | 3.46367200  | 2.71332500  | 2.66683300  |
| P | -1.87586800 | -0.71155500 | -0.56415800 |
| P | 1.51258500  | -0.31144000 | -0.25651500 |
| C | 1.71057200  | -2.95689700 | -1.96680700 |
| C | -1.02278400 | -3.40389300 | -2.49906700 |
| C | -0.12546400 | -3.18597800 | 0.22867100  |
| O | -1.61583400 | -4.19022700 | -3.11903700 |
| O | 2.73836400  | -3.45556700 | -2.21066300 |
| O | -0.26702700 | -3.86361400 | 1.15870100  |

|   |             |             |             |
|---|-------------|-------------|-------------|
| C | 1.84514600  | 1.31068800  | -1.09408300 |
| C | 1.50023000  | 2.58080900  | -0.56967400 |
| C | 2.59436700  | 1.23569700  | -2.29796100 |
| C | 1.90012300  | 3.73139600  | -1.25826100 |
| C | 2.96828700  | 2.42149600  | -2.94317400 |
| C | 2.63659300  | 3.68038000  | -2.44266300 |
| H | 1.62814200  | 4.70114700  | -0.84730000 |
| H | 3.54148500  | 2.35087300  | -3.86526700 |
| C | -3.19247200 | 0.02891200  | -1.60598500 |
| C | -3.09185100 | 1.35987100  | -2.06900500 |
| C | -4.29915700 | -0.76608500 | -1.98900600 |
| C | -4.11053200 | 1.87827900  | -2.87878200 |
| C | -5.29310000 | -0.20343100 | -2.79592600 |
| C | -5.22508900 | 1.11950600  | -3.24348900 |
| H | -4.02752900 | 2.90420800  | -3.23290700 |
| H | -6.14563000 | -0.81675500 | -3.08171800 |
| C | 0.70680900  | 2.77170500  | 0.69857300  |
| C | 3.09396800  | 4.94638100  | -3.12580600 |
| C | 3.03149300  | -0.06271600 | -2.94186800 |
| C | -1.92777200 | 2.24873900  | -1.70120400 |
| C | -4.43467400 | -2.20158700 | -1.53993600 |
| C | -6.33769000 | 1.71628700  | -4.07238400 |
| H | -1.96050200 | 3.19163600  | -2.25659500 |
| H | -1.94837700 | 2.48955100  | -0.63351200 |
| H | -0.96405900 | 1.77168700  | -1.90567700 |
| H | -6.78852900 | 0.97029300  | -4.73606300 |
| H | -7.13942100 | 2.10536400  | -3.43000300 |
| H | -5.97906800 | 2.54830900  | -4.68789200 |
| H | -3.64761300 | -2.83081500 | -1.96903100 |
| H | -4.35186700 | -2.27816800 | -0.45133600 |
| H | -5.40140000 | -2.61700100 | -1.84278100 |
| H | -0.24740800 | 2.24780100  | 0.64737500  |
| H | 1.22771400  | 2.38920200  | 1.58019000  |
| H | 0.49956000  | 3.83289800  | 0.86594400  |

|    |             |             |             |
|----|-------------|-------------|-------------|
| H  | 2.30775800  | 5.70937300  | -3.12176400 |
| H  | 3.96212000  | 5.37599300  | -2.60745500 |
| H  | 3.38610000  | 4.76151800  | -4.16435200 |
| H  | 3.84540900  | 0.12133300  | -3.64898500 |
| H  | 3.38360100  | -0.80183300 | -2.22019000 |
| H  | 2.21641900  | -0.53238500 | -3.49630100 |
| Si | -2.77504200 | -1.91967400 | 3.15951700  |
| Si | 4.37385100  | -2.79024400 | 1.48192400  |
| C  | 5.55241200  | -3.30135400 | 0.09160700  |
| C  | 2.99095500  | -4.06659100 | 1.64092000  |
| C  | 5.31854400  | -2.60101100 | 3.11679700  |
| C  | -1.24671600 | -2.52906500 | 4.10610000  |
| C  | -3.97121100 | -1.12161800 | 4.40100800  |
| C  | -3.61068900 | -3.36997500 | 2.27203500  |
| H  | 3.38841200  | -5.02164000 | 2.00679800  |
| H  | 2.20970500  | -3.73016400 | 2.32927200  |
| H  | 2.52284900  | -4.24810300 | 0.66762600  |
| H  | 5.03443600  | -3.31707700 | -0.87404500 |
| H  | 6.41618900  | -2.63211800 | 0.01681300  |
| H  | 5.92911300  | -4.31435900 | 0.28217600  |
| H  | 5.80152000  | -3.54664200 | 3.39379500  |
| H  | 6.09791300  | -1.83347000 | 3.04080000  |
| H  | 4.64193700  | -2.31634600 | 3.93068100  |
| H  | -0.75302100 | -1.68996100 | 4.60693400  |
| H  | -1.53216200 | -3.27245200 | 4.86178200  |
| H  | -0.51785300 | -2.99211100 | 3.43398700  |
| H  | -3.50012400 | -0.26142200 | 4.89091600  |
| H  | -4.87875500 | -0.77447600 | 3.89770200  |
| H  | -4.25706500 | -1.83988200 | 5.18041100  |
| H  | -2.94726600 | -3.79950400 | 1.51344200  |
| H  | -3.86974800 | -4.16514400 | 2.98275200  |
| H  | -4.52905700 | -3.03987900 | 1.77588000  |
| C  | -0.27420600 | 0.08429300  | 2.16335200  |
| O  | -0.21390900 | 0.55788200  | 3.32451500  |

|   |             |             |             |
|---|-------------|-------------|-------------|
| W | -0.00048600 | -2.03708200 | -1.45375900 |
| C | -0.18530600 | -0.82033900 | -3.08772200 |
| O | -0.36142000 | -0.11595400 | -3.99022700 |

**W-int5**

127

|    |             |             |             |
|----|-------------|-------------|-------------|
| C  | -2.49273900 | 4.49194800  | -1.31247800 |
| N  | -1.38520100 | 3.67344100  | -0.84825200 |
| O  | -1.00667500 | 0.26657000  | -1.79324800 |
| C  | -4.08555100 | -3.53574800 | -0.08845100 |
| Si | 0.89435400  | 2.01642200  | -0.89702500 |
| C  | -0.50395900 | 4.14742500  | -0.02937500 |
| N  | -3.59387600 | -2.20469300 | -0.39580900 |
| Si | -2.15527100 | -1.27691700 | -1.31259100 |
| N  | 0.59322200  | 3.35601500  | 0.24720300  |
| C  | -0.38310600 | 0.54532900  | -0.71241900 |
| C  | -4.31804000 | -1.09411000 | -0.42678400 |
| C  | 1.47049800  | 3.65650400  | 1.38886400  |
| N  | -3.57544400 | -0.16091800 | -1.06256500 |
| C  | -3.83510500 | 1.26732200  | -1.14921300 |
| C  | -0.57359500 | 5.49551800  | 0.61751400  |
| C  | -1.62432900 | 5.80410700  | 1.49111000  |
| C  | 0.40052800  | 6.46435100  | 0.33882600  |
| C  | -1.69660600 | 7.06422600  | 2.08675100  |
| H  | -2.37892700 | 5.05171900  | 1.70419600  |
| C  | 0.31857800  | 7.72842000  | 0.92306000  |
| H  | 1.21467100  | 6.22294300  | -0.33819100 |
| C  | -0.72682800 | 8.02875300  | 1.80117200  |
| H  | -2.50919900 | 7.29341100  | 2.77061300  |
| H  | 1.07255100  | 8.47708400  | 0.69663600  |
| H  | -0.78506900 | 9.01121200  | 2.26139300  |
| C  | -5.65908900 | -0.89004300 | 0.14337600  |
| C  | -6.66027900 | -0.23413700 | -0.58881100 |
| C  | -5.92139400 | -1.33864200 | 1.44767100  |
| C  | -7.91965400 | -0.04166900 | -0.02285800 |

|   |             |             |             |
|---|-------------|-------------|-------------|
| H | -6.45629000 | 0.10554100  | -1.59939100 |
| C | -7.17771100 | -1.12803800 | 2.01289300  |
| H | -5.13196100 | -1.81303600 | 2.02077400  |
| C | -8.17793000 | -0.48475500 | 1.27780500  |
| H | -8.69777200 | 0.45517000  | -0.59452200 |
| H | -7.37534100 | -1.46529300 | 3.02627800  |
| H | -9.15810800 | -0.32670300 | 1.71841100  |
| H | 2.28817200  | 4.32891100  | 1.10967600  |
| H | 0.89729200  | 4.11484500  | 2.19833600  |
| H | 1.90603600  | 2.72651800  | 1.76040800  |
| H | -3.40870300 | 4.25945700  | -0.75031300 |
| H | -2.32149900 | 5.57361000  | -1.23559200 |
| H | -2.69450900 | 4.25343200  | -2.36276400 |
| H | -3.43151800 | -4.26942500 | -0.56656800 |
| H | -4.07809000 | -3.72948000 | 0.98845300  |
| H | -5.10541600 | -3.67806300 | -0.46204400 |
| H | -2.88546800 | 1.79700900  | -1.22938000 |
| H | -4.44012000 | 1.50847200  | -2.03071800 |
| H | -4.36109700 | 1.61791200  | -0.25544300 |
| P | 2.92887400  | 0.11644400  | 0.70082200  |
| P | -0.60835500 | -0.99609900 | 0.36842700  |
| C | 0.78736900  | -3.86863600 | -0.16147200 |
| C | 3.45203000  | -2.97975600 | -0.03539400 |
| C | 1.63729000  | -1.67378100 | -1.84637600 |
| O | 4.49139500  | -3.48769000 | -0.14033900 |
| O | 0.27146000  | -4.91060200 | -0.31269500 |
| O | 1.62371700  | -1.41935200 | -2.98323300 |
| C | -1.60344100 | -0.85005800 | 1.92486700  |
| C | -2.04262700 | 0.38122100  | 2.46305100  |
| C | -2.03389700 | -2.06529800 | 2.51776900  |
| C | -2.93967000 | 0.37591100  | 3.53615100  |
| C | -2.93074600 | -2.01204100 | 3.59195700  |
| C | -3.41343200 | -0.80693300 | 4.10536200  |
| H | -3.27426700 | 1.32970400  | 3.93811500  |

|    |             |             |             |
|----|-------------|-------------|-------------|
| H  | -3.25883600 | -2.94816800 | 4.03878800  |
| C  | 4.74671100  | -0.10509800 | 0.92914000  |
| C  | 5.25334700  | -0.15763900 | 2.25090000  |
| C  | 5.63086900  | -0.30669400 | -0.15951900 |
| C  | 6.61541800  | -0.39979700 | 2.45779400  |
| C  | 6.98645300  | -0.54320900 | 0.09744300  |
| C  | 7.50105800  | -0.59189900 | 1.39443800  |
| H  | 6.99488400  | -0.43936000 | 3.47743800  |
| H  | 7.65830500  | -0.70366600 | -0.74400800 |
| C  | -1.55463200 | 1.70556000  | 1.94379600  |
| C  | -4.43459300 | -0.77937900 | 5.21631400  |
| C  | -1.55999200 | -3.42955500 | 2.07231400  |
| C  | 4.36273700  | 0.03359900  | 3.46176800  |
| C  | 5.16397500  | -0.28297000 | -1.59489000 |
| C  | 8.97444100  | -0.82056100 | 1.63885900  |
| H  | 4.95554900  | 0.03074600  | 4.38278300  |
| H  | 3.81283800  | 0.98034800  | 3.41241300  |
| H  | 3.61402400  | -0.76180200 | 3.54833700  |
| H  | 9.41667700  | -1.45161900 | 0.85988300  |
| H  | 9.52771900  | 0.12866100  | 1.64055200  |
| H  | 9.15123300  | -1.30123700 | 2.60744000  |
| H  | 4.28281200  | -0.91536100 | -1.74182900 |
| H  | 4.88023300  | 0.73235900  | -1.88800200 |
| H  | 5.95216100  | -0.63382700 | -2.26879500 |
| H  | -0.46360300 | 1.75940700  | 1.96820300  |
| H  | -1.86382400 | 1.89532900  | 0.91118100  |
| H  | -1.93751200 | 2.53221000  | 2.55069200  |
| H  | -4.24414600 | 0.04178100  | 5.91581400  |
| H  | -5.44401100 | -0.62955300 | 4.80927400  |
| H  | -4.44147000 | -1.71657000 | 5.78196100  |
| H  | -2.18325800 | -4.21360000 | 2.51244400  |
| H  | -1.57898800 | -3.56196800 | 0.98971000  |
| H  | -0.52973100 | -3.60974400 | 2.38818300  |
| Si | 0.98370600  | 2.79135200  | -3.12212600 |



|    |             |             |             |
|----|-------------|-------------|-------------|
| Si | -2.06078000 | -2.45755000 | -3.35243100 |
| C  | -3.85797700 | -2.94663900 | -3.72241200 |
| C  | -0.97881700 | -3.99658900 | -3.20053800 |
| C  | -1.40428000 | -1.30708000 | -4.69798000 |
| C  | 2.40774500  | 1.88116900  | -3.97820700 |
| C  | -0.60849100 | 2.52761900  | -4.11113100 |
| C  | 1.37866000  | 4.64547300  | -3.01457500 |
| H  | -1.05217200 | -4.58677000 | -4.12293500 |
| H  | 0.07075100  | -3.72473000 | -3.05451100 |
| H  | -1.26965700 | -4.63561100 | -2.36133000 |
| H  | -4.23227000 | -3.68323800 | -3.00326200 |
| H  | -4.52611900 | -2.07769900 | -3.69546200 |
| H  | -3.92654000 | -3.39035200 | -4.72357300 |
| H  | -1.36348900 | -1.83629500 | -5.65841500 |
| H  | -2.04491300 | -0.42736200 | -4.82261300 |
| H  | -0.39451000 | -0.96566600 | -4.45199000 |
| H  | 2.23084900  | 0.80036600  | -4.00025800 |
| H  | 2.52676200  | 2.23031200  | -5.01197100 |
| H  | 3.34326500  | 2.05644100  | -3.43788200 |
| H  | -0.80461200 | 1.46105900  | -4.24524300 |
| H  | -1.46869800 | 2.96732000  | -3.59908500 |
| H  | -0.51900500 | 2.99014500  | -5.10261400 |
| H  | 2.28367900  | 4.80753700  | -2.41836000 |
| H  | 1.54868700  | 5.06566400  | -4.01407700 |
| H  | 0.55508600  | 5.19833500  | -2.54960100 |
| C  | 2.68736700  | 1.47554800  | -0.42695500 |
| O  | 3.51777300  | 2.31480600  | -0.82706600 |
| W  | 1.65035900  | -2.11074100 | 0.13766400  |
| C  | 1.71546600  | -2.40608400 | 2.16297400  |
| O  | 1.74619600  | -2.57014500 | 3.31112000  |

**W-ts3**

127

|   |             |            |            |
|---|-------------|------------|------------|
| C | 0.84527300  | 4.38111800 | 1.73378100 |
| N | -0.11606400 | 3.68735600 | 0.91443900 |

|    |             |             |             |
|----|-------------|-------------|-------------|
| O  | 1.31238300  | 1.25798900  | 1.53177400  |
| Si | -1.29840800 | 1.96077800  | 0.80544300  |
| C  | -0.78328500 | 4.16395000  | -0.11421200 |
| N  | 3.97570900  | -1.47889000 | 1.04978500  |
| Si | 2.49570400  | -0.32503000 | 1.49157400  |
| N  | -1.60415500 | 3.18677500  | -0.56174500 |
| C  | 0.40417000  | 1.00882400  | 0.67279300  |
| C  | 4.66345700  | -0.43220300 | 0.61116200  |
| C  | -2.58136700 | 3.28645700  | -1.63014900 |
| N  | 3.88353100  | 0.65093200  | 0.83321800  |
| H  | -2.86969600 | 4.32872600  | -1.79668800 |
| H  | -2.19221800 | 2.87681100  | -2.57156400 |
| H  | -3.47448600 | 2.72019600  | -1.35704000 |
| H  | 1.35803900  | 5.17958200  | 1.18300400  |
| H  | 0.37350100  | 4.82820500  | 2.62017700  |
| H  | 1.58628600  | 3.65624900  | 2.08427600  |
| P  | -2.60562800 | -0.63347600 | -0.93207900 |
| P  | 0.90902000  | -0.65377700 | -0.14825400 |
| C  | 0.43200000  | -3.73558900 | 0.68248100  |
| C  | -2.36284100 | -3.75233200 | 0.13279900  |
| C  | -1.25459500 | -1.81459000 | 1.91363400  |
| O  | -3.22820100 | -4.52502700 | 0.21019700  |
| O  | 1.24246200  | -4.48608500 | 1.08549500  |
| O  | -1.48317600 | -1.49676200 | 3.01047900  |
| C  | 1.90311800  | -0.32228500 | -1.70027500 |
| C  | 1.90399000  | 0.91738200  | -2.38400400 |
| C  | 2.74012700  | -1.36727500 | -2.17321500 |
| C  | 2.78141500  | 1.10860600  | -3.45966900 |
| C  | 3.59622300  | -1.12114100 | -3.25224700 |
| C  | 3.64940000  | 0.11063300  | -3.90314900 |
| H  | 2.77434100  | 2.06969900  | -3.96916400 |
| H  | 4.24529800  | -1.92711400 | -3.58878700 |
| C  | -4.29272800 | -1.34724300 | -1.19702000 |
| C  | -4.65373900 | -1.61984200 | -2.54158700 |

|    |             |             |             |
|----|-------------|-------------|-------------|
| C  | -5.18311500 | -1.71086400 | -0.15820400 |
| C  | -5.89182500 | -2.20632900 | -2.81964600 |
| C  | -6.41331400 | -2.29483500 | -0.48689400 |
| C  | -6.79312100 | -2.54364600 | -1.80622700 |
| H  | -6.15849900 | -2.40893200 | -3.85554800 |
| H  | -7.08954000 | -2.57452300 | 0.31921500  |
| C  | 0.97493100  | 2.05203200  | -2.03698900 |
| C  | 2.74813000  | -2.77610600 | -1.62560600 |
| C  | -3.72639300 | -1.31276400 | -3.70155900 |
| C  | -4.86361300 | -1.50891100 | 1.30275400  |
| C  | -8.14098600 | -3.14393000 | -2.13079800 |
| H  | -4.20491200 | -1.56236900 | -4.65458500 |
| H  | -3.44426200 | -0.25392400 | -3.72958300 |
| H  | -2.79368400 | -1.88666600 | -3.64010400 |
| H  | -8.50510600 | -3.77720900 | -1.31433500 |
| H  | -8.89371200 | -2.36077200 | -2.29580200 |
| H  | -8.10113000 | -3.75194300 | -3.04153800 |
| H  | -3.82252400 | -1.75440600 | 1.52427600  |
| H  | -5.00932200 | -0.46433800 | 1.59176300  |
| H  | -5.50331000 | -2.13596500 | 1.93207300  |
| H  | -0.06088300 | 1.71326600  | -1.95685800 |
| H  | 1.23477300  | 2.53609000  | -1.08913300 |
| H  | 1.01001600  | 2.82599500  | -2.81001000 |
| H  | 3.75882300  | -3.19411600 | -1.66027000 |
| H  | 2.38776800  | -2.85071000 | -0.60523800 |
| H  | 2.10324100  | -3.41802100 | -2.23540000 |
| Si | -3.49644100 | 2.46245900  | 2.17109300  |
| Si | 2.25577700  | -0.79970800 | 3.78734100  |
| C  | -3.31875700 | 1.31143200  | 3.66687400  |
| C  | -2.85514200 | 4.22111600  | 2.64764100  |
| C  | -5.35015700 | 2.87970900  | 1.94100700  |
| H  | -3.37386000 | 0.25995700  | 3.37088000  |
| H  | -2.35291100 | 1.46412600  | 4.16181600  |
| H  | -4.11698200 | 1.50296700  | 4.39644200  |

|   |             |             |             |
|---|-------------|-------------|-------------|
| H | -1.87012900 | 4.16914500  | 3.12292400  |
| H | -2.77077700 | 4.87028900  | 1.76751100  |
| H | -3.56536400 | 4.69664800  | 3.33858800  |
| H | -5.95902600 | 1.97950000  | 1.80206800  |
| H | -5.73168200 | 3.42954800  | 2.81107000  |
| H | -5.50351800 | 3.51593200  | 1.05880900  |
| C | -2.65751500 | 0.70564000  | 0.16915600  |
| O | -3.73427400 | 1.25442700  | 0.66255600  |
| C | -0.57746600 | -2.94945800 | -1.94344400 |
| O | -0.42027100 | -3.25107200 | -3.05325900 |
| C | 4.60253800  | 0.33793400  | -5.05156300 |
| H | 4.62813600  | 1.39003500  | -5.35243600 |
| H | 5.62176900  | 0.03421700  | -4.78279300 |
| H | 4.31282200  | -0.25385300 | -5.92885200 |
| C | 5.99149100  | -0.43053700 | -0.02908100 |
| C | 7.07589400  | -1.09055500 | 0.56831400  |
| C | 6.15792300  | 0.21084300  | -1.26736000 |
| C | 8.31844300  | -1.10006400 | -0.06490900 |
| H | 6.95138900  | -1.57714600 | 1.53038500  |
| C | 7.39926400  | 0.18444800  | -1.90074900 |
| H | 5.31296900  | 0.69286500  | -1.74588100 |
| C | 8.48039000  | -0.46672700 | -1.30006700 |
| H | 9.15799500  | -1.60354400 | 0.40492600  |
| H | 7.52056600  | 0.67172500  | -2.86383600 |
| H | 9.44757000  | -0.48188500 | -1.79415100 |
| C | 4.43233400  | -2.84336300 | 1.22493700  |
| C | 4.08598200  | 2.01557000  | 0.38607800  |
| H | 3.57041400  | -3.51279100 | 1.19199600  |
| H | 5.13355300  | -3.12974700 | 0.43485000  |
| H | 4.92821200  | -2.97177400 | 2.19586200  |
| H | 3.54214300  | 2.68538800  | 1.05465500  |
| H | 5.14881800  | 2.27309800  | 0.41228900  |
| H | 3.71101200  | 2.16425900  | -0.63368300 |
| C | 3.97994000  | -0.51044100 | 4.53174600  |

|   |             |             |             |
|---|-------------|-------------|-------------|
| C | 0.98278900  | 0.36121100  | 4.56149200  |
| C | 1.76553500  | -2.61481100 | 3.99063600  |
| H | 3.97034900  | -0.72410700 | 5.60795200  |
| H | 4.72735500  | -1.16444500 | 4.06696100  |
| H | 4.30948100  | 0.52623300  | 4.39712700  |
| H | -0.01165300 | 0.18543000  | 4.13938900  |
| H | 0.92528300  | 0.19746900  | 5.64498000  |
| H | 1.24430500  | 1.40987900  | 4.38386900  |
| H | 0.77716800  | -2.81094900 | 3.56620800  |
| H | 2.47570600  | -3.28938900 | 3.50117600  |
| H | 1.73285300  | -2.87197500 | 5.05707400  |
| C | -0.69092300 | 5.52523600  | -0.68668000 |
| C | -0.77734400 | 6.64938000  | 0.14974800  |
| C | -0.50116800 | 5.70589100  | -2.06611300 |
| C | -0.67989600 | 7.93272800  | -0.38783600 |
| H | -0.94125100 | 6.51360800  | 1.21401500  |
| C | -0.39346100 | 6.99035500  | -2.59791200 |
| H | -0.43123300 | 4.83900400  | -2.71594600 |
| C | -0.48425300 | 8.10584800  | -1.76058500 |
| H | -0.75899600 | 8.79715600  | 0.26523400  |
| H | -0.24131300 | 7.12055700  | -3.66563400 |
| H | -0.40508300 | 9.10614700  | -2.17693300 |
| W | -0.86999600 | -2.41407600 | 0.01112300  |

### W-int6

127

|    |             |            |             |
|----|-------------|------------|-------------|
| C  | 3.20736600  | 2.77940200 | -1.70052100 |
| N  | 2.41127400  | 2.74835700 | -0.48938500 |
| O  | -1.32121100 | 2.03679000 | 0.97764000  |
| C  | -5.08084400 | 0.12537400 | -2.00519800 |
| Si | 1.39973400  | 1.49271400 | 0.53832400  |
| C  | 2.44777100  | 3.57736000 | 0.55215200  |
| N  | -4.34363800 | 0.55284100 | -0.83131400 |
| Si | -2.57807000 | 1.47428800 | -0.14158000 |
| N  | 1.82753600  | 2.94267400 | 1.57096000  |

|   |             |             |             |
|---|-------------|-------------|-------------|
| C | -0.29598700 | 1.10759600  | 0.66634800  |
| C | -4.87095300 | 0.84601400  | 0.33197900  |
| C | 1.17422800  | 3.53520700  | 2.72825700  |
| N | -3.95174300 | 1.53287100  | 1.05623500  |
| C | -3.93885500 | 1.63597600  | 2.50885500  |
| C | 3.03808900  | 4.92057400  | 0.59089600  |
| C | 2.88586200  | 5.78030100  | -0.51004800 |
| C | 3.75084500  | 5.35298000  | 1.72209500  |
| C | 3.44087300  | 7.05791900  | -0.47622100 |
| H | 2.31284300  | 5.45151900  | -1.37136500 |
| C | 4.31490300  | 6.62691000  | 1.74292000  |
| H | 3.87634900  | 4.68186700  | 2.56550000  |
| C | 4.15909900  | 7.48063800  | 0.64650300  |
| H | 3.31253600  | 7.72384000  | -1.32437900 |
| H | 4.87503600  | 6.95421900  | 2.61384700  |
| H | 4.59567200  | 8.47505400  | 0.66769200  |
| C | -6.22599100 | 0.51099900  | 0.82672400  |
| C | -7.10162100 | 1.52651600  | 1.23549000  |
| C | -6.62460500 | -0.83061200 | 0.90812400  |
| C | -8.37331900 | 1.20122000  | 1.70757600  |
| H | -6.78533400 | 2.56384000  | 1.17117600  |
| C | -7.89328100 | -1.15131000 | 1.39116900  |
| H | -5.92786200 | -1.61107900 | 0.62104600  |
| C | -8.76964800 | -0.13702000 | 1.78679700  |
| H | -9.05326300 | 1.99051500  | 2.01535600  |
| H | -8.19596300 | -2.19225600 | 1.46107500  |
| H | -9.75863900 | -0.38865400 | 2.15956300  |
| H | 1.61696800  | 3.15485300  | 3.65519100  |
| H | 1.27264800  | 4.62424300  | 2.71357200  |
| H | 0.11202100  | 3.27256300  | 2.70557900  |
| H | 2.60657100  | 3.10562800  | -2.55465800 |
| H | 4.07126200  | 3.44272600  | -1.59195900 |
| H | 3.56052600  | 1.76473600  | -1.91248200 |
| H | -4.40159200 | -0.39778100 | -2.68254100 |

|   |             |             |             |
|---|-------------|-------------|-------------|
| H | -5.90605800 | -0.54769100 | -1.74842500 |
| H | -5.49828700 | 0.98815900  | -2.54228500 |
| H | -3.08811900 | 2.25786700  | 2.78927000  |
| H | -4.86043400 | 2.09674400  | 2.87881300  |
| H | -3.81872800 | 0.65235900  | 2.97972500  |
| P | 2.18122500  | -1.32112800 | -0.42511200 |
| P | -1.13240100 | -0.32690100 | -0.06541600 |
| C | -1.45375000 | -1.60058800 | -3.09355800 |
| C | 1.25059900  | -2.29075700 | -3.46779600 |
| C | 0.57648900  | 0.36418400  | -2.76949500 |
| O | 1.83309900  | -2.77520700 | -4.35946600 |
| O | -2.42757400 | -1.64769800 | -3.73909300 |
| O | 0.81349000  | 1.39119000  | -3.26404200 |
| C | -1.96786000 | -1.35928400 | 1.28250500  |
| C | -1.71225200 | -1.23380800 | 2.67439500  |
| C | -2.97547600 | -2.27065400 | 0.86337400  |
| C | -2.46665600 | -1.99425100 | 3.58143600  |
| C | -3.70047100 | -2.99943100 | 1.81214000  |
| C | -3.47142600 | -2.87323300 | 3.18150400  |
| H | -2.25768100 | -1.88452600 | 4.64393800  |
| H | -4.46856200 | -3.68843300 | 1.46361500  |
| C | 3.18927000  | -2.74652000 | 0.13393000  |
| C | 2.92048400  | -3.36657200 | 1.37701300  |
| C | 4.22321600  | -3.23843600 | -0.69541800 |
| C | 3.72219200  | -4.43941900 | 1.78165300  |
| C | 5.00188000  | -4.30899800 | -0.24296300 |
| C | 4.77451700  | -4.91723200 | 0.99482400  |
| H | 3.51470000  | -4.91785400 | 2.73674200  |
| H | 5.80443200  | -4.67988200 | -0.87741200 |
| C | -0.68056300 | -0.30658700 | 3.28093000  |
| C | -4.30048000 | -3.63942500 | 4.18431600  |
| C | -3.31536900 | -2.52992400 | -0.58753100 |
| C | 1.80305800  | -2.90187200 | 2.28175900  |
| C | 4.50034600  | -2.66074000 | -2.06642200 |

|    |             |             |             |
|----|-------------|-------------|-------------|
| C  | 5.65275500  | -6.04718300 | 1.47784600  |
| H  | 1.63942800  | -3.61353000 | 3.09685100  |
| H  | 2.04729000  | -1.93036400 | 2.72405400  |
| H  | 0.85535200  | -2.78838100 | 1.74333200  |
| H  | 6.05663300  | -6.62753200 | 0.64142100  |
| H  | 6.50721400  | -5.66261600 | 2.05103600  |
| H  | 5.10243400  | -6.73017400 | 2.13385700  |
| H  | 3.75898200  | -3.00332200 | -2.79530600 |
| H  | 4.46727500  | -1.56645200 | -2.06842400 |
| H  | 5.48730800  | -2.96810500 | -2.42689700 |
| H  | 0.31306300  | -0.46738900 | 2.86259300  |
| H  | -0.93079900 | 0.74164800  | 3.09422400  |
| H  | -0.62962100 | -0.46524100 | 4.36372300  |
| H  | -3.82253200 | -3.66143900 | 5.16931800  |
| H  | -5.29069800 | -3.18039700 | 4.30797600  |
| H  | -4.46333600 | -4.67434200 | 3.86173800  |
| H  | -4.34553300 | -2.88974600 | -0.68473000 |
| H  | -3.21628200 | -1.64213500 | -1.20426600 |
| H  | -2.66207300 | -3.29653100 | -1.01474700 |
| Si | 5.02769900  | 0.17072900  | 1.81011400  |
| Si | -2.46557600 | 3.02681800  | -1.89759300 |
| C  | -3.97294100 | 4.17900800  | -1.73964400 |
| C  | -2.54451400 | 2.16742500  | -3.58809100 |
| C  | -0.86943600 | 4.03967300  | -1.72857200 |
| C  | 5.85696000  | -0.09485300 | 0.14675900  |
| C  | 5.26485200  | 1.95088800  | 2.37887300  |
| C  | 5.59880100  | -1.06811900 | 3.09672000  |
| H  | -2.28290800 | 2.87297200  | -4.38705000 |
| H  | -1.85662000 | 1.31996800  | -3.65268100 |
| H  | -3.55354300 | 1.79236000  | -3.78905900 |
| H  | -4.90690600 | 3.60575400  | -1.78887300 |
| H  | -3.96456200 | 4.72174700  | -0.78708600 |
| H  | -3.98939500 | 4.91859200  | -2.55045100 |
| H  | -0.83077200 | 4.84795100  | -2.47034000 |



|   |             |             |             |
|---|-------------|-------------|-------------|
| H | -0.80332600 | 4.48109500  | -0.72762200 |
| H | 0.00584900  | 3.39841000  | -1.86969200 |
| H | 5.31482000  | 0.42095900  | -0.65427700 |
| H | 6.88080600  | 0.29852900  | 0.16597400  |
| H | 5.90163200  | -1.15837200 | -0.10421600 |
| H | 6.30796500  | 2.14190300  | 2.66007500  |
| H | 5.00061900  | 2.65371400  | 1.58059400  |
| H | 4.63146300  | 2.17262100  | 3.24561100  |
| H | 5.37365500  | -2.08588600 | 2.75689900  |
| H | 6.67813100  | -0.99298400 | 3.27616200  |
| H | 5.08495800  | -0.90962900 | 4.05204100  |
| C | 2.46742600  | -0.04037700 | 0.65695600  |
| O | 3.35880800  | -0.10772000 | 1.68594700  |
| W | 0.19569800  | -1.47786300 | -1.98689100 |
| C | -0.08911200 | -3.33412000 | -1.17339100 |
| O | -0.22247700 | -4.38908300 | -0.70885200 |

#### W-ts4

127

|    |             |             |             |
|----|-------------|-------------|-------------|
| N  | -0.64619500 | 2.89923500  | 0.83009500  |
| O  | 1.56386400  | 1.47053900  | 0.09489900  |
| Si | -0.37494500 | 1.55684500  | -0.47167900 |
| C  | -0.64889800 | 3.81918200  | -0.12445500 |
| N  | 4.06405200  | 0.22135400  | -0.44330200 |
| Si | 2.61504000  | 0.26671800  | 0.61656500  |
| N  | -0.36305500 | 3.18097800  | -1.27956900 |
| C  | 0.74072800  | 0.33059900  | -1.09507600 |
| C  | 4.87763900  | 1.27252300  | -0.05507300 |
| N  | 4.34222600  | 2.06343900  | 0.81798200  |
| P  | -2.49599200 | -0.64831200 | -0.07770500 |
| P  | 1.03523000  | -1.23593100 | -0.23258100 |
| C  | 0.17906800  | -3.55891200 | 2.10432800  |
| C  | -2.58447800 | -3.03616400 | 1.95052600  |
| C  | -0.76048000 | -0.86271000 | 2.49872200  |
| O  | -3.53787900 | -3.46899600 | 2.46550900  |

|   |             |             |             |
|---|-------------|-------------|-------------|
| O | 0.82472800  | -4.31603000 | 2.71533700  |
| O | -0.67632100 | -0.02659100 | 3.30700000  |
| C | 1.74379800  | -2.44992200 | -1.43735700 |
| C | 1.16594900  | -2.61147400 | -2.71860700 |
| C | 2.77549400  | -3.32336500 | -1.02450800 |
| C | 1.67436300  | -3.59719800 | -3.57241400 |
| C | 3.24476300  | -4.29914900 | -1.90978800 |
| C | 2.71806900  | -4.44501400 | -3.19546300 |
| H | 1.22687500  | -3.71552100 | -4.55757700 |
| H | 4.04096900  | -4.96540000 | -1.58281000 |
| C | -4.30791500 | -0.89611600 | -0.03905200 |
| C | -4.91273600 | -1.73288500 | -1.00210600 |
| C | -5.08521100 | -0.31273100 | 0.98710900  |
| C | -6.29593900 | -1.93678100 | -0.94616200 |
| C | -6.46184300 | -0.55194800 | 1.00682100  |
| C | -7.08839500 | -1.35024400 | 0.04482500  |
| H | -6.76433100 | -2.57465100 | -1.69291600 |
| H | -7.06214000 | -0.10421100 | 1.79628500  |
| C | -0.00506300 | -1.78039300 | -3.19610300 |
| C | 3.39909400  | -3.23164200 | 0.35050700  |
| C | -4.10580800 | -2.43293100 | -2.07383300 |
| C | -4.46486000 | 0.55682600  | 2.05683300  |
| H | -4.76042200 | -2.87958500 | -2.82853900 |
| H | -3.41704400 | -1.75313800 | -2.58783500 |
| H | -3.49508600 | -3.23658200 | -1.64783200 |
| H | -3.62902500 | 0.05014200  | 2.55353600  |
| H | -4.07641400 | 1.48451200  | 1.62178900  |
| H | -5.20077500 | 0.81936700  | 2.82306900  |
| H | -0.82106300 | -1.78437200 | -2.46416600 |
| H | 0.27802900  | -0.73285900 | -3.34010300 |
| H | -0.40015700 | -2.17370500 | -4.13841000 |
| H | 4.09738600  | -4.05734200 | 0.51877900  |
| H | 3.95866800  | -2.29637800 | 0.48088600  |
| H | 2.64323800  | -3.27515600 | 1.13913400  |

|    |             |             |             |
|----|-------------|-------------|-------------|
| Si | -4.05385600 | 2.32178100  | -2.03366300 |
| Si | 3.20167800  | -0.01490400 | 2.89033500  |
| C  | -2.19488400 | 0.97624600  | -0.46519300 |
| O  | -3.18319100 | 1.90939300  | -0.62873400 |
| W  | -0.95482800 | -2.28854600 | 1.06649500  |
| C  | -1.10524900 | -3.68381500 | -0.42826900 |
| O  | -1.18301900 | -4.48469600 | -1.26316700 |
| C  | 2.50149700  | -1.57252000 | 3.71051200  |
| C  | 5.09090100  | -0.18380700 | 3.04231200  |
| C  | 2.53685300  | 1.49337200  | 3.83171600  |
| H  | 1.41138300  | -1.61042100 | 3.69397000  |
| H  | 2.87399200  | -2.49069300 | 3.24732200  |
| H  | 2.82046100  | -1.57958300 | 4.76168700  |
| H  | 5.34756900  | -0.44845300 | 4.07615200  |
| H  | 5.45417600  | -0.99283200 | 2.39673000  |
| H  | 5.63507600  | 0.72510600  | 2.77666800  |
| H  | 1.45745300  | 1.37792800  | 3.98128400  |
| H  | 3.00496500  | 1.57877400  | 4.82047200  |
| H  | 2.70874900  | 2.42556500  | 3.28460800  |
| C  | 4.17259400  | -0.35324800 | -1.79294500 |
| C  | 5.07698800  | 3.08728700  | 1.53281400  |
| C  | -0.02895500 | 3.74158200  | -2.57046800 |
| C  | -1.04258500 | 3.02291000  | 2.21447700  |
| H  | -0.56105900 | 4.68294500  | -2.73929200 |
| H  | 1.04905800  | 3.92541000  | -2.65794500 |
| H  | -0.31577600 | 3.03243400  | -3.35033600 |
| H  | -2.05986100 | 2.64181400  | 2.36614000  |
| H  | -0.36412300 | 2.43034500  | 2.83040700  |
| H  | -1.00221800 | 4.06725400  | 2.53636900  |
| H  | 3.20721600  | -0.29071700 | -2.30017200 |
| H  | 4.90726700  | 0.20636500  | -2.37626500 |
| H  | 4.48147600  | -1.40156300 | -1.76266100 |
| H  | 4.85018300  | 3.01023600  | 2.60241900  |
| H  | 6.16684700  | 3.03358300  | 1.40955800  |

|   |             |             |             |
|---|-------------|-------------|-------------|
| H | 4.74405400  | 4.08136200  | 1.20632200  |
| C | -0.96320300 | 5.25331100  | 0.02149500  |
| C | -0.07253000 | 6.22876100  | -0.44877900 |
| C | -2.17280900 | 5.63777800  | 0.61981200  |
| C | -0.38949800 | 7.58045400  | -0.31358100 |
| H | 0.86845500  | 5.92932600  | -0.89982400 |
| C | -2.48895500 | 6.99006600  | 0.74066300  |
| H | -2.86666800 | 4.87649000  | 0.96185500  |
| C | -1.59712900 | 7.96151300  | 0.27725200  |
| H | 0.30572400  | 8.33478600  | -0.66989900 |
| H | -3.43014100 | 7.28498100  | 1.19507600  |
| H | -1.84352200 | 9.01477300  | 0.37616400  |
| C | 6.26692300  | 1.35207100  | -0.59225700 |
| C | 6.75498000  | 2.53951600  | -1.15428700 |
| C | 7.10406900  | 0.22821200  | -0.52080300 |
| C | 8.06317000  | 2.60329400  | -1.63664800 |
| H | 6.10274500  | 3.40542400  | -1.22080800 |
| C | 8.41434100  | 0.29710100  | -0.99166600 |
| H | 6.71968300  | -0.69218100 | -0.09089500 |
| C | 8.89528000  | 1.48425000  | -1.55262700 |
| H | 8.43158000  | 3.52512600  | -2.07805100 |
| H | 9.05918600  | -0.57468900 | -0.92474400 |
| H | 9.91466500  | 1.53553200  | -1.92508000 |
| C | -5.85324000 | 1.85187600  | -1.78061900 |
| C | -3.89935800 | 4.18796100  | -2.20885300 |
| C | -3.28483300 | 1.41620000  | -3.49120100 |
| C | -8.58481500 | -1.55263000 | 0.06444600  |
| C | 3.26545600  | -5.48030000 | -4.14960800 |
| H | -9.09646500 | -0.73874000 | -0.46682600 |
| H | -8.87012900 | -2.49116400 | -0.42220400 |
| H | -8.97337600 | -1.56666200 | 1.08852100  |
| H | 2.49463000  | -5.83342400 | -4.84331700 |
| H | 4.08364600  | -5.06706300 | -4.75524900 |
| H | 3.66448700  | -6.34842700 | -3.61367500 |

|   |             |            |             |
|---|-------------|------------|-------------|
| H | -3.73072200 | 1.75309200 | -4.43478800 |
| H | -2.20424600 | 1.59040900 | -3.54519400 |
| H | -3.44118000 | 0.33545600 | -3.41290800 |
| H | -6.47081600 | 2.24514500 | -2.59836600 |
| H | -5.98480800 | 0.76655700 | -1.73760500 |
| H | -6.23421800 | 2.26820300 | -0.84106400 |
| H | -4.27678800 | 4.69993600 | -1.31635800 |
| H | -2.85872900 | 4.49604100 | -2.34832400 |
| H | -4.47947300 | 4.54509400 | -3.06877500 |

### W-int7

127

|    |             |             |             |
|----|-------------|-------------|-------------|
| N  | 0.75838500  | 3.51919900  | 0.41379800  |
| O  | 0.69340100  | 0.71752400  | 1.11252300  |
| Si | -0.14641200 | 0.99275900  | -0.32681000 |
| C  | 1.30012300  | 3.21949200  | -0.70847200 |
| N  | 3.37579100  | -0.22631500 | 0.45981400  |
| Si | 1.79865900  | -0.52023300 | 1.26144700  |
| N  | 0.80827300  | 2.08080800  | -1.34690700 |
| C  | -0.30687000 | -0.61034800 | -1.21040900 |
| C  | 4.12471900  | 0.70018000  | 1.18265500  |
| N  | 3.49508400  | 1.26533400  | 2.15420100  |
| P  | -2.96626400 | 0.24856000  | -0.08577900 |
| P  | 0.65460500  | -1.75416400 | -0.40269500 |
| C  | -1.37181200 | -3.98194100 | 0.18105100  |
| C  | -3.79494600 | -2.67310000 | 0.42024800  |
| C  | -1.64835700 | -1.59342900 | 1.93426600  |
| O  | -4.87351500 | -3.02019300 | 0.67594900  |
| O  | -1.07990300 | -5.10092700 | 0.29683700  |
| O  | -1.58029900 | -1.28322200 | 3.05205200  |
| C  | 1.45589900  | -3.11430400 | -1.34344700 |
| C  | 1.55654200  | -3.10559900 | -2.75990300 |
| C  | 2.00152000  | -4.19657700 | -0.61049200 |
| C  | 2.15156300  | -4.20427600 | -3.39102300 |
| C  | 2.58554900  | -5.26678300 | -1.29325700 |

|    |             |             |             |
|----|-------------|-------------|-------------|
| C  | 2.66236800  | -5.29681000 | -2.68616300 |
| H  | 2.22038000  | -4.20153900 | -4.47686500 |
| H  | 2.98776300  | -6.09825100 | -0.71834500 |
| C  | -4.68784200 | 0.71473100  | 0.28205700  |
| C  | -5.68403700 | 0.42007400  | -0.67975600 |
| C  | -5.03472600 | 1.34009200  | 1.50343200  |
| C  | -7.00286000 | 0.80450700  | -0.42481000 |
| C  | -6.37003600 | 1.70619800  | 1.70853300  |
| C  | -7.36400400 | 1.46035100  | 0.75663800  |
| H  | -7.76805700 | 0.58557700  | -1.16647500 |
| H  | -6.64209600 | 2.18818300  | 2.64523400  |
| C  | 1.09120400  | -1.96623300 | -3.63885400 |
| C  | 2.01688700  | -4.21746500 | 0.89923200  |
| C  | -5.35650300 | -0.30174500 | -1.96919800 |
| C  | -4.02113100 | 1.61136700  | 2.59178200  |
| H  | -6.23247200 | -0.34888700 | -2.62304800 |
| H  | -4.54978600 | 0.19243600  | -2.52261600 |
| H  | -5.03002300 | -1.33035300 | -1.77686300 |
| H  | -3.42887300 | 0.71999800  | 2.82641200  |
| H  | -3.31876200 | 2.39499900  | 2.28955600  |
| H  | -4.51912600 | 1.93554700  | 3.51064200  |
| H  | 0.01040100  | -1.82548600 | -3.59671900 |
| H  | 1.53079800  | -1.01467600 | -3.32481000 |
| H  | 1.38371200  | -2.15287900 | -4.67726300 |
| H  | 2.26657900  | -5.21421600 | 1.27467900  |
| H  | 2.76913500  | -3.52146000 | 1.29336100  |
| H  | 1.05530300  | -3.93545900 | 1.33075600  |
| Si | -2.96072200 | 4.04486600  | -0.79076600 |
| Si | 2.00216000  | -1.26520400 | 3.49437800  |
| C  | -1.92060400 | 1.58115300  | -0.01035400 |
| O  | -2.30146700 | 2.84795400  | 0.22157000  |
| W  | -1.93425000 | -2.06397300 | -0.02577300 |
| C  | -2.26513900 | -2.30039900 | -2.04854900 |
| O  | -2.46776500 | -2.40023800 | -3.18144500 |

|   |            |             |             |
|---|------------|-------------|-------------|
| C | 1.16020100 | -2.91736700 | 3.91115300  |
| C | 3.84481200 | -1.52701800 | 3.87785400  |
| C | 1.21842100 | 0.09544600  | 4.54931000  |
| H | 0.17479000 | -3.04031000 | 3.45701400  |
| H | 1.78414600 | -3.76950900 | 3.62441200  |
| H | 1.02603700 | -2.95804000 | 5.00028700  |
| H | 3.95257800 | -1.94851600 | 4.88548100  |
| H | 4.28714900 | -2.24244200 | 3.17329900  |
| H | 4.42592200 | -0.60334300 | 3.82740000  |
| H | 0.13502400 | 0.10102300  | 4.39100700  |
| H | 1.40968000 | -0.07901800 | 5.61587500  |
| H | 1.60322600 | 1.08191500  | 4.27704500  |
| C | 3.68159000 | -0.53555100 | -0.94236000 |
| C | 4.13799900 | 2.10354900  | 3.14474400  |
| C | 0.90935100 | 1.93611800  | -2.80210800 |
| C | 1.30763800 | 4.50382100  | 1.31641600  |
| H | 0.52616600 | 2.82410300  | -3.32103800 |
| H | 1.94342700 | 1.77430900  | -3.12920800 |
| H | 0.31484000 | 1.07048400  | -3.09906100 |
| H | 0.55532600 | 5.27781800  | 1.51986900  |
| H | 1.52460800 | 4.01174800  | 2.27380200  |
| H | 2.22496800 | 5.00042900  | 0.96807300  |
| H | 2.96021400 | -0.05856900 | -1.61728600 |
| H | 4.67711700 | -0.17171600 | -1.20172100 |
| H | 3.65983300 | -1.61333000 | -1.11998300 |
| H | 3.82532700 | 1.77601500  | 4.14340700  |
| H | 5.23559300 | 2.09974800  | 3.10991700  |
| H | 3.79385400 | 3.13913200  | 3.02660200  |
| C | 2.44172600 | 3.93571300  | -1.36130400 |
| C | 3.65170400 | 3.26671600  | -1.58960900 |
| C | 2.32450500 | 5.28267900  | -1.72848800 |
| C | 4.73240900 | 3.93453300  | -2.16539500 |
| H | 3.74345100 | 2.22563000  | -1.29900700 |
| C | 3.40135500 | 5.94845300  | -2.31759100 |

|   |             |             |             |
|---|-------------|-------------|-------------|
| H | 1.38622100  | 5.80142300  | -1.55415600 |
| C | 4.60738500  | 5.27697100  | -2.53494000 |
| H | 5.67060900  | 3.40794100  | -2.31726200 |
| H | 3.29937600  | 6.99165700  | -2.60405900 |
| H | 5.44627700  | 5.79747100  | -2.98887700 |
| C | 5.56825800  | 0.88527900  | 0.84312800  |
| C | 6.08480000  | 2.16294800  | 0.58892800  |
| C | 6.42720000  | -0.22389300 | 0.80838200  |
| C | 7.43859900  | 2.32809500  | 0.29129800  |
| H | 5.42052600  | 3.02054000  | 0.60732000  |
| C | 7.78195400  | -0.05567500 | 0.52406800  |
| H | 6.02434900  | -1.21321100 | 1.00633100  |
| C | 8.28924500  | 1.22043200  | 0.26023500  |
| H | 7.82668100  | 3.32179200  | 0.08551200  |
| H | 8.44116900  | -0.91904500 | 0.50528900  |
| H | 9.34355300  | 1.34989500  | 0.03197900  |
| C | -4.16205300 | 4.96192100  | 0.32090300  |
| C | -1.56995900 | 5.15588600  | -1.39480300 |
| C | -3.81950400 | 3.21790000  | -2.24359400 |
| C | -8.78835000 | 1.90360400  | 0.99081500  |
| C | 3.31417900  | -6.45140100 | -3.40845000 |
| H | -8.95625900 | 2.90953900  | 0.58315800  |
| H | -9.50284900 | 1.23178200  | 0.50328100  |
| H | -9.02667200 | 1.94088800  | 2.05899700  |
| H | 2.84868200  | -6.62695700 | -4.38420600 |
| H | 4.37938000  | -6.25181200 | -3.58724600 |
| H | 3.24842400  | -7.37655200 | -2.82630100 |
| H | -4.10849300 | 3.96869000  | -2.98938000 |
| H | -3.15657100 | 2.49585400  | -2.73481600 |
| H | -4.72173900 | 2.68720300  | -1.92396800 |
| H | -4.63811000 | 5.79738200  | -0.20649900 |
| H | -4.94783600 | 4.28113800  | 0.66868400  |
| H | -3.64908800 | 5.36613200  | 1.20137500  |
| H | -0.98170200 | 5.53328100  | -0.55229500 |



|           |             |             |             |
|-----------|-------------|-------------|-------------|
| H         | -0.88985500 | 4.60114100  | -2.05036900 |
| H         | -1.96856200 | 6.01006400  | -1.95651100 |
| <b>4'</b> |             |             |             |
| 90        |             |             |             |
| W         | 1.40904300  | -1.22691900 | -0.76947800 |
| P         | 2.21465700  | 1.91806100  | 1.15566100  |
| C         | 3.95474200  | 1.30080100  | 1.02297300  |
| C         | 4.56073100  | 0.66209800  | 2.12806700  |
| C         | 5.88113300  | 0.21274200  | 2.01772900  |
| H         | 6.33823800  | -0.29425300 | 2.86579300  |
| C         | 6.62740100  | 0.39763500  | 0.85061700  |
| C         | 6.02654700  | 1.07311500  | -0.21546100 |
| H         | 6.59672000  | 1.23836100  | -1.12760500 |
| C         | 4.70708700  | 1.52983500  | -0.15099300 |
| C         | 3.81454600  | 0.45124700  | 3.42925100  |
| C         | 8.03633800  | -0.13522800 | 0.73407500  |
| C         | 4.11852000  | 2.26393100  | -1.33728400 |
| P         | -0.87279800 | -1.51798900 | 0.18750100  |
| C         | -2.04096600 | -2.90883700 | 0.37097700  |
| C         | -2.48373000 | -3.60967000 | -0.77580700 |
| C         | -3.42359200 | -4.63263100 | -0.61206500 |
| H         | -3.77913900 | -5.16255200 | -1.49318700 |
| C         | -3.91767600 | -4.99322300 | 0.64502300  |
| C         | -3.45076200 | -4.29726700 | 1.76443800  |
| H         | -3.82192500 | -4.56785400 | 2.75069500  |
| C         | -2.52014400 | -3.25923700 | 1.65509200  |
| C         | -1.98076300 | -3.29610700 | -2.16874300 |
| C         | -4.90473500 | -6.12611400 | 0.79335600  |
| C         | -2.06614200 | -2.53776000 | 2.90436100  |
| Si        | -0.49303600 | 1.34755200  | 0.35752200  |
| N         | -1.14611600 | 2.50361500  | -0.91648800 |
| C         | -1.49937300 | 2.50645500  | -2.32492700 |
| C         | -1.47447600 | 3.39491600  | 0.03381200  |
| C         | -2.11121400 | 4.70310500  | -0.17301400 |

|    |             |             |             |
|----|-------------|-------------|-------------|
| C  | -3.15013600 | 5.12273900  | 0.67423800  |
| H  | -3.49244200 | 4.47141500  | 1.47135600  |
| C  | -3.75889400 | 6.35859300  | 0.46589800  |
| H  | -4.56964000 | 6.67596300  | 1.11456300  |
| C  | -3.32624000 | 7.18540100  | -0.57490600 |
| H  | -3.79867900 | 8.15072200  | -0.73160700 |
| C  | -2.28749300 | 6.77401800  | -1.41498900 |
| H  | -1.94754800 | 7.41912000  | -2.21934700 |
| C  | -1.68374900 | 5.53304800  | -1.22210500 |
| H  | -0.86900100 | 5.21509200  | -1.86440900 |
| N  | -1.11013900 | 2.85152200  | 1.20661800  |
| C  | -1.03561700 | 3.47119500  | 2.51708400  |
| C  | -1.66405200 | -0.07509100 | 0.60225600  |
| O  | -2.91342600 | 0.09221100  | 1.11000700  |
| Si | -4.43651900 | 0.12582500  | 0.34824200  |
| C  | -5.54331800 | -0.96672900 | 1.39540900  |
| H  | -6.57414000 | -0.96251300 | 1.02054900  |
| H  | -5.56236800 | -0.62500600 | 2.43696700  |
| H  | -5.17671800 | -1.99941700 | 1.38417100  |
| C  | -4.28890900 | -0.49687700 | -1.41702200 |
| H  | -4.16673500 | -1.58356200 | -1.44159800 |
| H  | -3.43338400 | -0.04844100 | -1.93443300 |
| H  | -5.19319100 | -0.24206000 | -1.98308600 |
| C  | -4.99687300 | 1.92277800  | 0.38380600  |
| H  | -6.02235400 | 2.02866400  | 0.00909000  |
| H  | -4.34833700 | 2.55238000  | -0.23633200 |
| H  | -4.97040500 | 2.31832900  | 1.40621400  |
| O  | 1.47356200  | -4.19191500 | -1.88049400 |
| O  | -0.02612500 | -0.21521100 | -3.44430400 |
| O  | 4.21039200  | -0.82383400 | -2.19296400 |
| O  | 2.84940400  | -2.28612600 | 1.90387300  |
| C  | 1.45722900  | -3.09362700 | -1.47491300 |
| C  | 0.51305500  | -0.56165000 | -2.47006300 |
| C  | 3.19450200  | -0.92602900 | -1.63277000 |

|   |             |             |             |
|---|-------------|-------------|-------------|
| C | 2.32741500  | -1.88726500 | 0.95005200  |
| C | 1.24535200  | 0.83991300  | 0.28283900  |
| H | 8.04147100  | -1.13267400 | 0.27448300  |
| H | 8.66039400  | 0.51222900  | 0.10774100  |
| H | 8.51535200  | -0.22576000 | 1.71522100  |
| H | 4.46366800  | -0.00928100 | 4.18120300  |
| H | 3.44552700  | 1.39951100  | 3.84065100  |
| H | 2.94796300  | -0.20397400 | 3.29552800  |
| H | 3.20556300  | 1.77798400  | -1.69390300 |
| H | 3.85411800  | 3.29732100  | -1.07597600 |
| H | 4.83015700  | 2.29739400  | -2.16796200 |
| H | -0.97423700 | -3.69840600 | -2.31943500 |
| H | -2.63566900 | -3.74244900 | -2.92353000 |
| H | -1.92826800 | -2.22092800 | -2.36504100 |
| H | -4.38227800 | -7.08291500 | 0.92477800  |
| H | -5.55031800 | -5.98461300 | 1.66664600  |
| H | -5.54112300 | -6.22229000 | -0.09276600 |
| H | -0.97259900 | -2.50666500 | 2.97971000  |
| H | -2.42689100 | -1.50317600 | 2.90979600  |
| H | -2.44857800 | -3.03521100 | 3.80075000  |
| H | -1.70922200 | 1.48354900  | -2.64229600 |
| H | -2.38219100 | 3.12725200  | -2.50253800 |
| H | -0.67082300 | 2.88002500  | -2.93629400 |
| H | -0.08009100 | 3.20704500  | 2.97786500  |
| H | -1.09549900 | 4.55959200  | 2.43367100  |
| H | -1.84981400 | 3.11739000  | 3.15952700  |

**XYZ coordinates obtained for the reaction of 1' with Mo(CO)<sub>6</sub> at the B3LYP-D3/6-31G\*  
Mo ( LanL2DZ ) level of theory.**

**1'**

57

|    |            |             |             |
|----|------------|-------------|-------------|
| Si | 1.65615400 | -0.46126400 | 0.15919200  |
| N  | 0.46116800 | 0.39864000  | -1.00773500 |

|    |             |             |             |
|----|-------------|-------------|-------------|
| C  | -1.14821900 | 2.11708300  | -0.13989000 |
| P  | 1.27743900  | -2.51965200 | 0.59126700  |
| Si | 3.80011100  | 0.41598300  | -0.24165800 |
| N  | 0.68857400  | 0.89501700  | 1.06526600  |
| C  | -1.02857900 | 3.44672700  | 0.28756500  |
| H  | -0.08078700 | 3.80615400  | 0.67694300  |
| C  | -2.12170700 | 4.30729500  | 0.19219700  |
| H  | -2.02475800 | 5.34008300  | 0.51400200  |
| C  | -3.33822700 | 3.84052800  | -0.31286900 |
| H  | -4.18997100 | 4.51152400  | -0.38007800 |
| C  | -3.46160100 | 2.51181500  | -0.72865000 |
| H  | -4.40898500 | 2.14581100  | -1.11402000 |
| C  | -2.36968900 | 1.64922400  | -0.64959700 |
| H  | -2.46454100 | 0.60946400  | -0.94677200 |
| C  | -0.01656700 | 1.17751200  | -0.03166900 |
| C  | 0.03213400  | 0.35431200  | -2.38927100 |
| C  | 4.33055600  | 0.00695400  | -2.01698100 |
| H  | 5.32608200  | 0.41791300  | -2.22845800 |
| H  | 3.63097200  | 0.42910100  | -2.74829200 |
| H  | 4.36940300  | -1.07640300 | -2.17643000 |
| C  | 0.56620100  | 1.49280600  | 2.37535300  |
| C  | -0.58954300 | -2.32008900 | 0.37657000  |
| C  | -1.19315900 | -2.55817000 | -0.88457800 |
| C  | -2.55961700 | -2.30005900 | -1.06651800 |
| H  | -3.00210400 | -2.47679500 | -2.04589800 |
| C  | -3.37000700 | -1.82986400 | -0.03091700 |
| C  | -2.78360700 | -1.66984100 | 1.22680100  |
| H  | -3.40356500 | -1.34268200 | 2.06032100  |
| C  | -1.42474800 | -1.91981100 | 1.45210500  |
| C  | 5.05767400  | -0.29523700 | 0.98393800  |
| H  | 6.06119400  | 0.10177700  | 0.78444500  |
| H  | 5.10447000  | -1.38751500 | 0.90832000  |
| H  | 4.79344100  | -0.04370200 | 2.01740500  |
| C  | 3.67891500  | 2.30112200  | -0.03726600 |

|   |             |             |             |
|---|-------------|-------------|-------------|
| H | 4.62918700  | 2.78849700  | -0.28885400 |
| H | 3.42354700  | 2.57021700  | 0.99435900  |
| H | 2.90385800  | 2.71622500  | -0.69273200 |
| C | -0.40598300 | -3.10444200 | -2.05571000 |
| C | -4.82528400 | -1.49191800 | -0.25623900 |
| C | -0.89679300 | -1.78908900 | 2.86286400  |
| H | 1.00253400  | 0.81281200  | 3.11101900  |
| H | 1.10380700  | 2.44782600  | 2.43813000  |
| H | -0.48353800 | 1.66474500  | 2.63733900  |
| H | -0.80815400 | -0.33509600 | -2.52607100 |
| H | -0.26849200 | 1.34897000  | -2.73505300 |
| H | 0.86610900  | 0.00689600  | -3.00460600 |
| H | -1.67895900 | -1.43861300 | 3.54531800  |
| H | -0.52945800 | -2.75490900 | 3.23056700  |
| H | -0.04997600 | -1.10290800 | 2.92036100  |
| H | -1.05102400 | -3.24112400 | -2.93107200 |
| H | 0.42392400  | -2.44807000 | -2.33473000 |
| H | 0.04631400  | -4.07169200 | -1.80807600 |
| H | -5.45849000 | -1.87995100 | 0.55030900  |
| H | -4.97913100 | -0.40403000 | -0.28587500 |
| H | -5.19329200 | -1.90255400 | -1.20246700 |

**Mo(CO)<sub>6</sub>**

13

|   |             |             |             |
|---|-------------|-------------|-------------|
| C | 1.35582700  | -0.65586800 | 1.43451800  |
| C | 1.46422000  | -0.17947400 | -1.46596500 |
| C | -0.58620900 | -1.96532500 | -0.34489500 |
| C | -1.35563300 | 0.65612500  | -1.43393700 |
| O | -0.90762900 | -3.05219200 | -0.53699700 |
| O | -2.10541600 | 1.01501800  | -2.22798000 |
| O | 2.10423600  | -1.01708100 | 2.22881100  |
| O | 2.27733100  | -0.27719700 | -2.27267700 |
| C | -1.46396600 | 0.17934200  | 1.46650400  |
| O | -2.27681500 | 0.27763800  | 2.27341200  |
| C | 0.58652900  | 1.96547200  | 0.34518700  |

|    |            |            |            |
|----|------------|------------|------------|
| O  | 0.90711700 | 3.05332000 | 0.53306300 |
| Mo | 0.00011400 | 0.00005500 | 0.00024900 |

**Mo-int1**

68

|    |             |             |             |
|----|-------------|-------------|-------------|
| P  | -0.81402700 | -0.40728200 | 0.88760300  |
| Si | 0.39982700  | 1.35015100  | 0.54785000  |
| Si | -0.37790300 | 3.52635000  | 0.99565500  |
| N  | 2.11125100  | 1.01922500  | 1.16138400  |
| C  | 0.46448600  | -1.75424000 | 0.63555500  |
| C  | 0.82879600  | -2.49928200 | 1.79360400  |
| C  | 1.85518400  | -3.44566000 | 1.71926500  |
| H  | 2.12882300  | -3.99655200 | 2.61730700  |
| C  | 2.54200000  | -3.70469600 | 0.52801300  |
| C  | 2.14779900  | -3.00223800 | -0.60821800 |
| H  | 2.65310200  | -3.19621900 | -1.55333100 |
| C  | 1.11993400  | -2.04606400 | -0.58528000 |
| C  | 0.14082400  | -2.30226700 | 3.12946400  |
| C  | 3.64289400  | -4.73760400 | 0.47135300  |
| C  | 0.78192100  | -1.40953200 | -1.91639800 |
| C  | -1.52346800 | 4.06617600  | -0.41323700 |
| H  | -1.76694200 | 5.13116500  | -0.30890900 |
| H  | -2.46198900 | 3.50419600  | -0.39654200 |
| H  | -1.06130800 | 3.91824400  | -1.39548400 |
| C  | 1.17785700  | 4.61466800  | 1.01178700  |
| H  | 0.91218700  | 5.66144500  | 1.20535100  |
| H  | 1.69697600  | 4.57265700  | 0.04679800  |
| H  | 1.88393100  | 4.29554500  | 1.78686200  |
| C  | -1.27299900 | 3.60128500  | 2.65882000  |
| H  | -1.57964300 | 4.63217400  | 2.87730400  |
| H  | -0.63195100 | 3.25804800  | 3.47873500  |
| H  | -2.17290200 | 2.97795500  | 2.64389500  |
| N  | 1.61776000  | 1.51808400  | -0.86583800 |
| C  | 1.65713500  | 1.87584100  | -2.26865200 |
| C  | 2.74581500  | 0.49685600  | 2.35505200  |

|   |             |             |             |
|---|-------------|-------------|-------------|
| C | 2.62881300  | 1.15207200  | -0.06894100 |
| C | 4.01860300  | 0.87781400  | -0.47433900 |
| C | 4.59003300  | -0.36544800 | -0.15765800 |
| H | 4.00483000  | -1.11150600 | 0.37007800  |
| C | 5.89081400  | -0.65204900 | -0.56918200 |
| H | 6.32693900  | -1.61879700 | -0.33533400 |
| C | 6.62742800  | 0.29834200  | -1.28184300 |
| H | 7.64254300  | 0.07342600  | -1.59621800 |
| C | 6.05949300  | 1.53648800  | -1.59561500 |
| H | 6.63163600  | 2.27510500  | -2.14902400 |
| C | 4.75355700  | 1.82569800  | -1.20155500 |
| H | 4.30930800  | 2.78697200  | -1.44123400 |
| H | 0.05735500  | -0.60420100 | -1.82529300 |
| H | 1.68313800  | -1.01029900 | -2.39492900 |
| H | 0.36032000  | -2.16081800 | -2.59395100 |
| H | 4.21857300  | -4.76182700 | 1.40356400  |
| H | 3.23274700  | -5.74473300 | 0.31875100  |
| H | 4.33588800  | -4.54006000 | -0.35388500 |
| H | 0.31630400  | -1.29979100 | 3.53562300  |
| H | -0.94579800 | -2.41563400 | 3.04491400  |
| H | 0.50190200  | -3.03478600 | 3.85933900  |
| H | 2.28673800  | 0.96187200  | 3.23110600  |
| H | 2.61561500  | -0.58877700 | 2.42750500  |
| H | 3.81491000  | 0.72924800  | 2.35307000  |
| H | 1.83708900  | 2.95037100  | -2.40048100 |
| H | 2.44501300  | 1.32394900  | -2.79052900 |
| H | 0.69422800  | 1.63094600  | -2.72062200 |
| C | -2.29564200 | 0.68691400  | -1.91755900 |
| C | -3.74221300 | 1.13517700  | 0.56338300  |
| C | -4.85998400 | -0.64966900 | -1.42878400 |
| C | -2.41330100 | -2.21141500 | -1.43870300 |
| O | -5.87336300 | -0.72372300 | -1.99407500 |
| O | -2.03165000 | -3.16706200 | -1.96284700 |
| O | -1.79099900 | 1.37342600  | -2.70542800 |

|    |             |             |             |
|----|-------------|-------------|-------------|
| O  | -4.10465400 | 2.06237300  | 1.15597300  |
| C  | -3.73846800 | -1.72173000 | 1.08992200  |
| O  | -4.05972400 | -2.38698500 | 1.97698100  |
| Mo | -3.10118900 | -0.51855000 | -0.47339900 |

**CO**

2

|   |            |            |             |
|---|------------|------------|-------------|
| C | 0.00000000 | 0.00000000 | -0.65022600 |
| O | 0.00000000 | 0.00000000 | 0.48766900  |

**Mo-ts1'**

70

|    |             |             |             |
|----|-------------|-------------|-------------|
| P  | 0.87498700  | 0.20763500  | -0.39647800 |
| Si | -1.30715000 | 1.46434000  | 0.20135700  |
| Si | -1.37808100 | 3.54341700  | 1.32556300  |
| N  | -2.44548200 | 1.21169800  | -1.22926300 |
| C  | 0.04701600  | -1.14207600 | 0.70245700  |
| C  | -0.62289500 | -2.21254500 | 0.06391000  |
| C  | -1.11553400 | -3.26878500 | 0.84090100  |
| H  | -1.62649500 | -4.09353300 | 0.34567600  |
| C  | -0.95308800 | -3.30651900 | 2.23074700  |
| C  | -0.30537200 | -2.23096700 | 2.84425800  |
| H  | -0.18045400 | -2.23553200 | 3.92565900  |
| C  | 0.18946700  | -1.14536900 | 2.10931700  |
| C  | 0.39788400  | 4.15490100  | 1.53297800  |
| H  | 0.42214600  | 5.04489400  | 2.17410100  |
| H  | 0.83109800  | 4.41673600  | 0.56259700  |
| H  | 1.04044200  | 3.39239100  | 1.98770300  |
| C  | -2.15866800 | 3.20245400  | 3.02213800  |
| H  | -2.17007600 | 4.12165700  | 3.62141000  |
| H  | -1.59558100 | 2.44876100  | 3.58558100  |
| H  | -3.19322100 | 2.85334200  | 2.92588600  |
| C  | -2.43068200 | 4.78004100  | 0.35402400  |
| H  | -2.50671800 | 5.73340300  | 0.89240800  |
| H  | -3.44599800 | 4.39979700  | 0.19285800  |
| H  | -1.98059200 | 4.97320800  | -0.62558000 |



|   |             |             |             |
|---|-------------|-------------|-------------|
| N | -2.69394400 | 0.36771300  | 0.73195400  |
| C | -3.21381600 | -0.26766100 | 1.92746700  |
| C | -2.34173400 | 1.30288300  | -2.67643300 |
| C | -3.20166100 | 0.36050100  | -0.51000100 |
| H | -2.55079400 | 2.32375500  | -3.00792400 |
| H | -1.32771700 | 1.03792700  | -2.99136100 |
| H | -3.04629100 | 0.61762400  | -3.15340100 |
| H | -4.29643400 | -0.40472500 | 1.84953000  |
| H | -2.73723600 | -1.23792500 | 2.08965600  |
| H | -3.00143500 | 0.36990000  | 2.78937600  |
| C | 3.54558700  | 1.02791200  | -2.13812000 |
| C | 2.97355900  | -1.81022500 | -1.88080900 |
| C | 5.43634600  | -0.65507700 | -0.71087400 |
| C | 3.34305600  | -1.65337800 | 0.99363200  |
| O | 6.57859200  | -0.85234900 | -0.79519500 |
| O | 3.28264000  | -2.40983500 | 1.86485000  |
| O | 3.57607300  | 1.77156600  | -3.02132100 |
| O | 2.65743100  | -2.64539800 | -2.61658900 |
| C | 0.57584100  | 1.80780300  | -1.04493500 |
| O | 0.03097500  | 2.79838400  | -1.47236600 |
| C | 3.69643100  | 1.25073300  | 0.77008700  |
| O | 3.75397300  | 2.12666300  | 1.52281700  |
| C | -4.33103600 | -0.44764000 | -0.98809700 |
| C | -4.41081200 | -1.80368800 | -0.62836800 |
| C | -5.32058200 | 0.12119400  | -1.80611200 |
| C | -5.47031800 | -2.58111000 | -1.09171500 |
| H | -3.62949100 | -2.24500000 | -0.01724200 |
| C | -6.38299300 | -0.66082700 | -2.25552300 |
| H | -5.26233200 | 1.17285500  | -2.06956600 |
| C | -6.45742800 | -2.01133000 | -1.90134700 |
| H | -5.52397000 | -3.63208500 | -0.82372700 |
| H | -7.15205000 | -0.21740100 | -2.88079300 |
| H | -7.28396100 | -2.61947700 | -2.25731800 |
| C | -1.44356900 | -4.48488700 | 3.03815300  |

|    |             |             |             |
|----|-------------|-------------|-------------|
| C  | 0.84900500  | -0.00638500 | 2.85789200  |
| C  | -0.82426200 | -2.26004800 | -1.43742700 |
| H  | 0.27926400  | 0.92736200  | 2.76511900  |
| H  | 0.93197200  | -0.23664700 | 3.92445300  |
| H  | 1.85088300  | 0.20806100  | 2.47753400  |
| H  | -2.32909300 | -4.94309800 | 2.58381400  |
| H  | -0.67208200 | -5.26357700 | 3.10255600  |
| H  | -1.69676900 | -4.19315400 | 4.06311300  |
| H  | -1.47157700 | -3.09821900 | -1.71550300 |
| H  | -1.28293600 | -1.34086900 | -1.81633800 |
| H  | 0.12650500  | -2.38046900 | -1.96772400 |
| Mo | 3.46355900  | -0.30596800 | -0.56304500 |

**Mo-int2'**

70

|    |             |             |             |
|----|-------------|-------------|-------------|
| P  | 0.98446500  | -0.41874200 | -0.39237500 |
| Si | -1.64005600 | 1.51674300  | 0.20886400  |
| Si | -1.81938300 | 3.61043900  | 1.25830800  |
| N  | -2.61894700 | 1.26009700  | -1.31395000 |
| C  | 0.22868600  | -1.37763700 | 0.99949500  |
| C  | -0.44350600 | -2.58803400 | 0.69038800  |
| C  | -0.95987500 | -3.37685400 | 1.72307200  |
| H  | -1.46900300 | -4.30585800 | 1.47303600  |
| C  | -0.84319400 | -3.00672300 | 3.06602900  |
| C  | -0.18323400 | -1.81171500 | 3.35920300  |
| H  | -0.07244600 | -1.51132900 | 4.39925200  |
| C  | 0.36189300  | -0.99376500 | 2.35808400  |
| C  | -0.63115000 | -3.05642700 | -0.73788800 |
| C  | -1.43825300 | -3.86256100 | 4.15920600  |
| C  | 1.10719000  | 0.25079200  | 2.78867000  |
| C  | -0.19120600 | 3.93721500  | 2.15924900  |
| H  | -0.14424900 | 4.98173100  | 2.49139600  |
| H  | 0.66355800  | 3.74779700  | 1.50102600  |
| H  | -0.08624800 | 3.29931100  | 3.04394400  |
| C  | -3.27892500 | 3.53805000  | 2.46396700  |

|   |             |             |             |
|---|-------------|-------------|-------------|
| H | -3.40436000 | 4.50076300  | 2.97486600  |
| H | -3.12225400 | 2.77034700  | 3.23082500  |
| H | -4.21664600 | 3.30948800  | 1.94392400  |
| C | -2.12012900 | 4.89201300  | -0.10063700 |
| H | -2.18112800 | 5.89992200  | 0.32876000  |
| H | -3.05517600 | 4.69736000  | -0.63892600 |
| H | -1.29767200 | 4.87643400  | -0.82373500 |
| N | -2.93408300 | 0.24564800  | 0.55161300  |
| C | -3.28965200 | -0.71583000 | 1.57942400  |
| C | -2.63510500 | 1.74452500  | -2.67992400 |
| C | -3.33634900 | 0.28704100  | -0.73167900 |
| C | -4.31378400 | -0.60405600 | -1.37266700 |
| C | -4.00483100 | -1.20443900 | -2.60455200 |
| H | -3.04798300 | -1.00806500 | -3.07750200 |
| C | -4.91434800 | -2.07858300 | -3.19728000 |
| H | -4.66823600 | -2.55123900 | -4.14317000 |
| C | -6.13620200 | -2.34629200 | -2.57378400 |
| H | -6.84522000 | -3.02370700 | -3.04063900 |
| C | -6.44722800 | -1.74783200 | -1.34918400 |
| H | -7.39744300 | -1.95495100 | -0.86636300 |
| C | -5.53648000 | -0.88508200 | -0.74256900 |
| H | -5.77643800 | -0.41552800 | 0.20607400  |
| H | 0.76387500  | 1.15124000  | 2.27413300  |
| H | 1.00053300  | 0.41352900  | 3.86592900  |
| H | 2.17556500  | 0.16265000  | 2.56897000  |
| H | -1.27931300 | -4.92872200 | 3.96229600  |
| H | -1.00231000 | -3.62809600 | 5.13574800  |
| H | -2.52297300 | -3.70738800 | 4.23666700  |
| H | -1.22751300 | -2.34165500 | -1.31749800 |
| H | 0.32516100  | -3.16453600 | -1.26225000 |
| H | -1.14200500 | -4.02459200 | -0.76475200 |
| H | -2.53487200 | 2.83275000  | -2.67388500 |
| H | -1.79843700 | 1.32637100  | -3.25060400 |
| H | -3.57469300 | 1.47700600  | -3.17058900 |

|    |             |             |             |
|----|-------------|-------------|-------------|
| H  | -4.15759100 | -0.37489600 | 2.15609400  |
| H  | -3.51294000 | -1.69203500 | 1.14093600  |
| H  | -2.44028400 | -0.83344500 | 2.25399500  |
| C  | 3.37319000  | 1.55331700  | 0.43083200  |
| C  | 3.18077000  | 0.91343100  | -2.39144500 |
| C  | 5.54917000  | 0.06941300  | -0.90384000 |
| C  | 3.55884000  | -1.92458400 | -1.77240500 |
| O  | 6.69590500  | 0.21957600  | -1.02352800 |
| O  | 3.51858200  | -2.90609200 | -2.38285300 |
| O  | 3.21120800  | 2.50991400  | 1.05899800  |
| O  | 2.96996700  | 1.50982600  | -3.35706200 |
| C  | 0.11240400  | 1.10337700  | -0.33363300 |
| O  | 0.36124100  | 2.18878600  | -0.93159100 |
| C  | 3.85189500  | -1.28397600 | 1.03691200  |
| O  | 3.98383400  | -1.90564100 | 2.00341000  |
| Mo | 3.56989800  | -0.17857000 | -0.67508700 |

### Mo-int2

123

|    |             |             |             |
|----|-------------|-------------|-------------|
| C  | 5.50190500  | -1.68976200 | 1.55337400  |
| N  | 4.96987300  | -0.96334700 | 0.41486100  |
| C  | -5.38313900 | -0.60887600 | 2.27258900  |
| Si | 3.48527400  | -1.03855400 | -0.72661800 |
| C  | 5.63510900  | -0.19524100 | -0.45296900 |
| N  | -4.96334500 | -0.46578700 | 0.89108400  |
| Si | -3.68803800 | -1.18360900 | -0.27824500 |
| N  | 4.84650500  | -0.04775100 | -1.52706100 |
| C  | -5.67053500 | 0.02241300  | -0.13076000 |
| C  | 4.92450800  | 1.01058200  | -2.51966600 |
| N  | -5.04876100 | -0.35960500 | -1.25485300 |
| C  | -5.20462700 | 0.24377800  | -2.56707500 |
| C  | 6.97042900  | 0.39912700  | -0.25994900 |
| C  | 7.99584500  | 0.14915000  | -1.18295500 |
| C  | 7.20200800  | 1.23303600  | 0.84373600  |
| C  | 9.25320900  | 0.72172500  | -0.99254500 |

|   |              |             |             |
|---|--------------|-------------|-------------|
| H | 7.80642400   | -0.50043800 | -2.03273700 |
| C | 8.45877100   | 1.81014900  | 1.02172100  |
| H | 6.38956300   | 1.44985700  | 1.52988500  |
| C | 9.48486800   | 1.55176000  | 0.10822400  |
| H | 10.05046900  | 0.52133500  | -1.70229400 |
| H | 8.63568800   | 2.46408800  | 1.87059700  |
| H | 10.46390400  | 1.99992100  | 0.25194300  |
| C | -6.88521900  | 0.85490400  | -0.04402200 |
| C | -8.08276000  | 0.42649000  | -0.63325900 |
| C | -6.82508400  | 2.09098200  | 0.61577500  |
| C | -9.22080700  | 1.22847800  | -0.54895200 |
| H | -8.11927900  | -0.53405300 | -1.13927500 |
| C | -7.96448200  | 2.89180600  | 0.68698300  |
| H | -5.88221300  | 2.42894800  | 1.03409000  |
| C | -9.16225800  | 2.45994300  | 0.11008400  |
| H | -10.15142300 | 0.89329100  | -0.99746900 |
| H | -7.91608700  | 3.85349300  | 1.18937000  |
| H | -10.04915700 | 3.08423900  | 0.17086000  |
| H | 4.45337700   | 0.66459400  | -3.44293900 |
| H | 4.40238700   | 1.90871200  | -2.17095600 |
| H | 5.96682800   | 1.26472700  | -2.73090000 |
| H | 4.67460200   | -1.93852900 | 2.22151400  |
| H | 5.99025800   | -2.62092900 | 1.23807000  |
| H | 6.22911400   | -1.08285000 | 2.09964300  |
| H | -4.49629100  | -0.78707400 | 2.88319500  |
| H | -5.88623100  | 0.29621000  | 2.62464300  |
| H | -6.06659200  | -1.45932000 | 2.39426400  |
| H | -6.26153100  | 0.41397600  | -2.79167500 |
| H | -4.66869400  | 1.19771800  | -2.62657800 |
| H | -4.79332100  | -0.43730800 | -3.31548400 |
| P | 1.70603800   | 0.12413100  | -0.36902500 |
| P | -1.76324000  | -0.24994200 | -0.55512100 |
| C | -1.44828600  | -1.72894900 | 2.50191000  |
| C | -0.09542200  | -2.83369600 | 0.21268700  |

|   |             |             |             |
|---|-------------|-------------|-------------|
| C | 0.10543700  | 0.65103200  | 2.34577600  |
| O | -0.17515700 | -3.83093200 | -0.38761700 |
| O | -2.32577500 | -2.01946200 | 3.22788400  |
| O | 0.20828000  | 1.63292700  | 2.95323700  |
| C | -2.33528400 | 1.53380600  | -0.67127100 |
| C | -2.25936700 | 2.14785900  | -1.95433600 |
| C | -2.84713900 | 2.29720400  | 0.40799900  |
| C | -2.71089600 | 3.46057100  | -2.12927100 |
| C | -3.29812200 | 3.60670600  | 0.17917300  |
| C | -3.24964700 | 4.20707900  | -1.07709300 |
| H | -2.64301600 | 3.91271700  | -3.11735600 |
| H | -3.69037700 | 4.17469400  | 1.02248300  |
| C | 2.52614900  | 1.73688300  | 0.15839300  |
| C | 2.38043600  | 2.84549000  | -0.72473200 |
| C | 3.29902700  | 1.92093100  | 1.33293600  |
| C | 3.05205800  | 4.04386400  | -0.46392700 |
| C | 3.96126400  | 3.14092000  | 1.54622300  |
| C | 3.86618900  | 4.21051100  | 0.66040000  |
| H | 2.93690300  | 4.87271500  | -1.16047900 |
| H | 4.56125600  | 3.25333700  | 2.44891300  |
| C | -1.71151400 | 1.42088800  | -3.16661600 |
| C | -3.78021700 | 5.60349900  | -1.30194700 |
| C | -2.92363900 | 1.80841800  | 1.83948200  |
| C | 1.49164500  | 2.78835900  | -1.94894800 |
| C | 3.42739500  | 0.89774500  | 2.43952000  |
| C | 4.57751600  | 5.51756100  | 0.92007100  |
| H | 1.53153600  | 3.73406700  | -2.50080800 |
| H | 1.77410100  | 1.97774300  | -2.62816900 |
| H | 0.44846900  | 2.61186700  | -1.66557500 |
| H | 5.40699000  | 5.39035600  | 1.62417400  |
| H | 4.97976400  | 5.94578300  | -0.00555000 |
| H | 3.89426100  | 6.26269300  | 1.34920200  |
| H | 4.46185000  | 0.82292200  | 2.79452900  |
| H | 2.81220400  | 1.19885900  | 3.29578600  |

|    |             |             |             |
|----|-------------|-------------|-------------|
| H  | 3.09805500  | -0.09029500 | 2.13844100  |
| H  | -1.64081300 | 2.10185400  | -4.02236400 |
| H  | -0.71912500 | 1.00179700  | -2.97561500 |
| H  | -2.35003400 | 0.57769000  | -3.45353300 |
| H  | -3.21308100 | 6.12811200  | -2.07904700 |
| H  | -4.82973300 | 5.58098300  | -1.62658000 |
| H  | -3.73562900 | 6.20259700  | -0.38585200 |
| H  | -3.92338900 | 1.97537600  | 2.25781300  |
| H  | -2.68736000 | 0.75124900  | 1.93572400  |
| H  | -2.21624700 | 2.36353700  | 2.46507900  |
| Si | 3.46925300  | -3.22903800 | -1.58592600 |
| Si | -4.04843500 | -3.51071500 | -0.36540700 |
| C  | -5.94109100 | -3.69798000 | -0.38296600 |
| C  | -3.34109500 | -4.41439800 | 1.13698600  |
| C  | -3.30213700 | -4.19344300 | -1.96610400 |
| C  | 2.13008200  | -3.44906300 | -2.90232400 |
| C  | 5.19216100  | -3.46786000 | -2.35465300 |
| C  | 3.25794300  | -4.45106600 | -0.15371100 |
| H  | -3.67666300 | -5.45959900 | 1.12987800  |
| H  | -2.24774100 | -4.40664700 | 1.11954500  |
| H  | -3.65987600 | -3.95326600 | 2.07675500  |
| H  | -6.38263800 | -3.31780500 | 0.54629000  |
| H  | -6.38900900 | -3.14637800 | -1.21750600 |
| H  | -6.22468700 | -4.75346800 | -0.48039800 |
| H  | -3.51858900 | -5.26522400 | -2.06255300 |
| H  | -3.70548100 | -3.68525600 | -2.84969900 |
| H  | -2.21475200 | -4.06502600 | -1.96290300 |
| H  | 2.26002700  | -2.73391400 | -3.72269800 |
| H  | 2.17555200  | -4.46169600 | -3.32345100 |
| H  | 1.13298800  | -3.30491800 | -2.47637900 |
| H  | 5.35440500  | -2.77884900 | -3.19124300 |
| H  | 5.98290800  | -3.28832100 | -1.61585600 |
| H  | 5.30995600  | -4.49263800 | -2.72897500 |
| H  | 2.29587500  | -4.31964800 | 0.34850200  |

|    |             |             |             |
|----|-------------|-------------|-------------|
| H  | 3.30931100  | -5.48236500 | -0.52588300 |
| H  | 4.04880700  | -4.32261600 | 0.59432200  |
| C  | 1.41542100  | -1.92210900 | 2.40352800  |
| O  | 2.27990200  | -2.42683500 | 3.01784300  |
| Mo | -0.00954800 | -1.11707200 | 1.29900300  |

**Mo-int3**

127

|    |              |             |             |
|----|--------------|-------------|-------------|
| C  | -5.47651800  | -1.69762100 | -1.67729100 |
| N  | -4.88142900  | -1.02123400 | -0.53943900 |
| C  | 5.48250900   | -0.20659800 | -2.40811900 |
| Si | -3.32851800  | -1.07265800 | 0.51054200  |
| C  | -5.49723900  | -0.27720100 | 0.37721600  |
| N  | 4.98532300   | -0.21961100 | -1.04610100 |
| Si | 3.65661400   | -1.08303900 | -0.04942100 |
| N  | -4.65650300  | -0.13850100 | 1.41422500  |
| C  | 5.63311400   | 0.13365500  | 0.06617100  |
| C  | -4.70373200  | 0.89343600  | 2.43743600  |
| N  | 4.94453400   | -0.37759300 | 1.09554900  |
| C  | 5.00680600   | 0.06686600  | 2.47792700  |
| C  | -6.84793400  | 0.29526800  | 0.28148000  |
| C  | -7.75979500  | 0.07586200  | 1.32688700  |
| C  | -7.20415500  | 1.08468800  | -0.82138600 |
| C  | -9.04132600  | 0.62076400  | 1.24778600  |
| H  | -7.44722400  | -0.51261500 | 2.19598700  |
| C  | -8.48526200  | 1.63020100  | -0.88925700 |
| H  | -6.47356000  | 1.28131400  | -1.60009600 |
| C  | -9.40519300  | 1.39317500  | 0.13915500  |
| H  | -9.75142200  | 0.44893100  | 2.05126800  |
| H  | -8.76455100  | 2.24296100  | -1.74137400 |
| H  | -10.40243500 | 1.81997300  | 0.08118800  |
| C  | 6.84425200   | 0.96872000  | 0.15376200  |
| C  | 7.99746000   | 0.48298900  | 0.78561600  |
| C  | 6.82052200   | 2.26812400  | -0.37367400 |
| C  | 9.12901600   | 1.29300300  | 0.87658100  |



|   |             |             |             |
|---|-------------|-------------|-------------|
| H | 8.00498000  | -0.52590300 | 1.18844900  |
| C | 7.95253400  | 3.07555100  | -0.26986500 |
| H | 5.90778500  | 2.64595700  | -0.82521100 |
| C | 9.10693000  | 2.58800200  | 0.35006800  |
| H | 10.02568800 | 0.91521300  | 1.35908100  |
| H | 7.93175000  | 4.08554900  | -0.66841800 |
| H | 9.98819500  | 3.21842100  | 0.42671400  |
| H | -4.17965800 | 0.52812400  | 3.32350200  |
| H | -4.20965800 | 1.80732300  | 2.09257600  |
| H | -5.73808400 | 1.12438300  | 2.70683200  |
| H | -4.68057900 | -1.92790300 | -2.38945200 |
| H | -5.96850300 | -2.63250800 | -1.37857900 |
| H | -6.21442100 | -1.05721300 | -2.16832800 |
| H | 4.62659200  | -0.30635200 | -3.08119100 |
| H | 6.00280200  | 0.73023000  | -2.62754700 |
| H | 6.17007800  | -1.04270800 | -2.59042800 |
| H | 6.04483400  | 0.14127100  | 2.81439700  |
| H | 4.52408100  | 1.04250500  | 2.59538700  |
| H | 4.48014300  | -0.66471100 | 3.09492100  |
| P | -1.63125900 | 0.18800300  | 0.09734800  |
| P | 1.71463000  | -0.17761100 | 0.20214400  |
| C | 1.49380700  | -1.33602500 | -2.96875000 |
| C | 0.14570600  | -2.72868600 | -0.84711600 |
| C | -0.11850200 | 0.97385400  | -2.54787300 |
| O | 0.07250400  | -3.77766300 | -0.34460000 |
| O | 2.37775200  | -1.47334600 | -3.72968100 |
| O | -0.33561500 | 2.07197100  | -2.84829500 |
| C | 2.19126700  | 1.61236900  | 0.49409900  |
| C | 1.97634000  | 2.14588200  | 1.80264700  |
| C | 2.69228600  | 2.48358700  | -0.51119800 |
| C | 2.31896300  | 3.47382900  | 2.07390400  |
| C | 3.04207100  | 3.80048100  | -0.17666300 |
| C | 2.87508300  | 4.31467900  | 1.10497100  |
| H | 2.14708400  | 3.86448500  | 3.07532900  |

|    |             |             |             |
|----|-------------|-------------|-------------|
| H  | 3.43147800  | 4.44959700  | -0.96045300 |
| C  | -2.55861600 | 1.75135500  | -0.36181700 |
| C  | -2.42753400 | 2.89477200  | 0.48013000  |
| C  | -3.40282700 | 1.84471900  | -1.49067300 |
| C  | -3.18441300 | 4.04285700  | 0.21289500  |
| C  | -4.15939500 | 3.00648700  | -1.70408000 |
| C  | -4.07556200 | 4.11434100  | -0.86341200 |
| H  | -3.08365700 | 4.90438000  | 0.87099800  |
| H  | -4.82116300 | 3.04462800  | -2.56891700 |
| C  | 1.38020700  | 1.33637600  | 2.93712400  |
| C  | 3.28423900  | 5.72951000  | 1.44120500  |
| C  | 2.82997200  | 2.12010400  | -1.97571400 |
| C  | -1.47213200 | 2.94711100  | 1.65341100  |
| C  | -3.48602800 | 0.76333500  | -2.54696400 |
| C  | -4.88151500 | 5.36463100  | -1.12436800 |
| H  | -1.51856400 | 3.92802200  | 2.14176300  |
| H  | -1.69287800 | 2.18517900  | 2.40569300  |
| H  | -0.43646800 | 2.78624500  | 1.33236300  |
| H  | -5.74296400 | 5.15931000  | -1.76913800 |
| H  | -5.25205800 | 5.80488600  | -0.19134100 |
| H  | -4.27365300 | 6.13130700  | -1.62332200 |
| H  | -4.50996700 | 0.64421900  | -2.92169500 |
| H  | -2.85444900 | 1.03372500  | -3.40442300 |
| H  | -3.14168400 | -0.20216400 | -2.18755400 |
| H  | 1.14235600  | 1.98515900  | 3.78698500  |
| H  | 0.47329100  | 0.79784300  | 2.64130500  |
| H  | 2.08402100  | 0.57359000  | 3.28706200  |
| H  | 2.63061700  | 6.16596500  | 2.20471000  |
| H  | 4.30916400  | 5.76158900  | 1.83585500  |
| H  | 3.25478600  | 6.37721200  | 0.55819700  |
| H  | 3.81925700  | 2.39987300  | -2.36001700 |
| H  | 2.67562400  | 1.06111700  | -2.16415900 |
| H  | 2.08955300  | 2.66699700  | -2.56792700 |
| Si | -3.21159100 | -3.28845600 | 1.29749600  |

|    |             |             |             |
|----|-------------|-------------|-------------|
| Si | 4.10061800  | -3.39127200 | -0.28306800 |
| C  | 5.99841800  | -3.50175100 | -0.23409900 |
| C  | 3.46736600  | -4.06459500 | -1.93280200 |
| C  | 3.38725700  | -4.39568000 | 1.15197500  |
| C  | -1.76008900 | -3.62015900 | 2.46047500  |
| C  | -4.84655600 | -3.55480500 | 2.23341200  |
| C  | -3.14675900 | -4.44391400 | -0.20239000 |
| H  | 3.85224200  | -5.08063900 | -2.08829400 |
| H  | 2.37298200  | -4.10596500 | -1.94196700 |
| H  | 3.78093800  | -3.44210800 | -2.77741800 |
| H  | 6.45529000  | -2.95962100 | -1.07064200 |
| H  | 6.39668000  | -3.08122500 | 0.69634100  |
| H  | 6.31897400  | -4.54941400 | -0.29863800 |
| H  | 3.69481900  | -5.44609900 | 1.06392500  |
| H  | 3.72108000  | -4.01181600 | 2.12422800  |
| H  | 2.29687700  | -4.36043400 | 1.14264600  |
| H  | -1.75227800 | -2.96437500 | 3.33472500  |
| H  | -1.84074200 | -4.65122400 | 2.83392800  |
| H  | -0.79778100 | -3.51886200 | 1.96222900  |
| H  | -4.92661800 | -2.88308300 | 3.09534800  |
| H  | -5.71127300 | -3.36951500 | 1.57176100  |
| H  | -4.92153300 | -4.58716300 | 2.59760700  |
| H  | -2.24375900 | -4.28342300 | -0.79228400 |
| H  | -3.14721600 | -5.49036000 | 0.12994600  |
| H  | -4.01195900 | -4.29624900 | -0.85832800 |
| C  | -1.38024700 | -1.61158600 | -2.91262900 |
| O  | -2.39137700 | -1.90399900 | -3.43226400 |
| Mo | 0.02622700  | -0.90611000 | -1.71980900 |
| C  | -1.67215800 | -0.35325600 | 3.97398700  |
| C  | 2.07585900  | -2.20708100 | 3.36789100  |
| O  | -0.66807500 | -0.18732000 | 4.46252800  |
| O  | 1.05611000  | -2.66193000 | 3.54203000  |

**Mo-ts1**

|    |             |             |             |
|----|-------------|-------------|-------------|
| N  | 4.58009900  | 0.71155900  | -0.55048600 |
| O  | 1.49603100  | -2.79030000 | -2.39581000 |
| Si | 3.17907800  | -0.68959600 | -0.75832500 |
| C  | 4.30549400  | 1.15681800  | -1.76196500 |
| N  | -4.87817200 | -0.76804500 | -0.07214000 |
| Si | -3.25945500 | -1.03345400 | -0.92321100 |
| N  | 3.30810900  | 0.40009600  | -2.26482100 |
| C  | 1.64896100  | -1.80435300 | -1.80057200 |
| C  | -5.16903300 | 0.25794900  | -0.88780200 |
| N  | -4.18000900 | 0.30438400  | -1.79414000 |
| P  | 1.69298600  | -0.06690300 | 0.75653000  |
| P  | -1.42574600 | -0.19473100 | -0.03684100 |
| C  | -1.92066100 | -2.52442200 | 2.28750900  |
| C  | 0.01695900  | -3.25435000 | 0.39493600  |
| C  | -0.36029900 | -0.24885100 | 3.14550100  |
| O  | 0.13512100  | -4.21826400 | -0.25082300 |
| O  | -2.96949800 | -2.96259200 | 2.58931200  |
| O  | -0.41500600 | 0.54925900  | 3.98317100  |
| C  | -2.03261400 | 1.53867300  | 0.36516400  |
| C  | -1.58302600 | 2.63677600  | -0.41804600 |
| C  | -2.94385800 | 1.79300000  | 1.42337400  |
| C  | -2.09342000 | 3.91776900  | -0.17500900 |
| C  | -3.42703700 | 3.09418100  | 1.62151500  |
| C  | -3.02884800 | 4.17018500  | 0.83120400  |
| H  | -1.74305600 | 4.74425100  | -0.79027500 |
| H  | -4.14269500 | 3.26271400  | 2.42467900  |
| Si | 4.63796300  | -2.55091300 | -1.03540800 |
| Si | -3.34687900 | -3.14669300 | -1.96545700 |
| C  | 0.84672200  | -2.79645400 | 2.98206600  |
| O  | 1.44302500  | -3.45233600 | 3.74206800  |
| C  | -0.14590800 | -0.62501100 | -2.06099700 |
| O  | -0.55576400 | -0.29274200 | -3.10513300 |
| C  | 2.65302100  | 0.69987100  | 2.15677800  |
| C  | 2.35030500  | 2.04708700  | 2.49261500  |

|   |             |             |             |
|---|-------------|-------------|-------------|
| C | 3.59627700  | 0.00548900  | 2.95310100  |
| C | 2.99993000  | 2.65841300  | 3.57104500  |
| C | 4.22020000  | 0.65575300  | 4.02538800  |
| C | 3.94034100  | 1.98274600  | 4.35307000  |
| H | 2.76034400  | 3.69339500  | 3.81020100  |
| H | 4.94733100  | 0.10541200  | 4.62077200  |
| C | 4.00386100  | -1.41814300 | 2.66260200  |
| C | 1.33313600  | 2.85983200  | 1.72028800  |
| C | 4.60017200  | 2.65539100  | 5.53421200  |
| C | -3.43167100 | 0.75516800  | 2.41072600  |
| C | -3.56747000 | 5.55951600  | 1.07813500  |
| C | -0.55064000 | 2.49464400  | -1.51363600 |
| C | 3.91855800  | -4.05830600 | -0.14103600 |
| C | 6.38587900  | -2.15886300 | -0.39803300 |
| C | 4.81495200  | -2.92595900 | -2.89284600 |
| C | -3.42396700 | -4.45083100 | -0.59764800 |
| C | -1.87847400 | -3.44364800 | -3.11408600 |
| C | -4.97485900 | -3.12289700 | -2.94234900 |
| C | -3.92348300 | 1.31060500  | -2.80589000 |
| C | -5.66807500 | -1.32727800 | 1.00807400  |
| C | 5.40316000  | 1.36957400  | 0.44711700  |
| C | 2.91999600  | 0.29466300  | -3.66101700 |
| C | 4.93775000  | 2.29684300  | -2.46298700 |
| C | 4.14074500  | 3.35241500  | -2.92961400 |
| C | 6.32523800  | 2.32891000  | -2.66216000 |
| C | 4.73063000  | 4.43486500  | -3.58213200 |
| H | 3.06711000  | 3.32249000  | -2.76658800 |
| C | 6.90940600  | 3.40995800  | -3.32231100 |
| H | 6.93662800  | 1.50262200  | -2.31084700 |
| C | 6.11394700  | 4.46412900  | -3.78003900 |
| H | 4.11157300  | 5.25450900  | -3.93535700 |
| H | 7.98385800  | 3.42882900  | -3.48008500 |
| H | 6.57136000  | 5.30661300  | -4.29102600 |
| C | -6.29963100 | 1.19187100  | -0.76356800 |

|   |             |             |             |
|---|-------------|-------------|-------------|
| C | -6.04346200 | 2.57253300  | -0.73001700 |
| C | -7.61330900 | 0.71610500  | -0.63632600 |
| C | -7.10044300 | 3.46682200  | -0.56949800 |
| H | -5.02355400 | 2.93708500  | -0.78527900 |
| C | -8.66607000 | 1.61880600  | -0.49182600 |
| H | -7.80849600 | -0.35140300 | -0.66692300 |
| C | -8.41044900 | 2.99264600  | -0.45587500 |
| H | -6.89911000 | 4.53331100  | -0.52907100 |
| H | -9.68368000 | 1.25019200  | -0.40409700 |
| H | -9.23214500 | 3.69279800  | -0.33541000 |
| H | 7.05712000  | -3.00091900 | -0.61157000 |
| H | 6.78593200  | -1.27071500 | -0.90086100 |
| H | 6.41673300  | -1.97553900 | 0.68070100  |
| H | 5.49540100  | -3.77383100 | -3.04498900 |
| H | 3.85274900  | -3.18167200 | -3.34763100 |
| H | 5.23065000  | -2.06492600 | -3.43048100 |
| H | 3.85455900  | -3.88648000 | 0.93887500  |
| H | 2.90907600  | -4.28568100 | -0.50021600 |
| H | 4.54595500  | -4.94319000 | -0.30822100 |
| H | -2.47468400 | -4.51131600 | -0.05848200 |
| H | -4.21009300 | -4.23510500 | 0.13399900  |
| H | -3.62872100 | -5.43509000 | -1.03804300 |
| H | -2.02585100 | -4.38881700 | -3.65227100 |
| H | -1.76537700 | -2.64408700 | -3.85336800 |
| H | -0.94276900 | -3.52243700 | -2.55269300 |
| H | -5.82960900 | -2.92654700 | -2.28417900 |
| H | -4.96619100 | -2.35271600 | -3.72193400 |
| H | -5.14056200 | -4.09339000 | -3.42677900 |
| H | 1.58924100  | 2.92472700  | 0.65741200  |
| H | 0.33507200  | 2.41192900  | 1.76958000  |
| H | 1.26291600  | 3.87689200  | 2.12219700  |
| H | 4.73866600  | 3.72863300  | 5.35965200  |
| H | 3.98936600  | 2.55143300  | 6.44129300  |
| H | 5.58042200  | 2.21651400  | 5.75139100  |

|    |             |             |             |
|----|-------------|-------------|-------------|
| H  | 4.77966000  | -1.44998100 | 1.88892200  |
| H  | 4.41461000  | -1.90395100 | 3.55397200  |
| H  | 3.16451500  | -2.01143700 | 2.29913200  |
| H  | 6.11787400  | 2.05660600  | -0.01584300 |
| H  | 4.78223600  | 1.92446500  | 1.15680400  |
| H  | 5.95845700  | 0.61334800  | 1.00789800  |
| H  | 3.38674500  | 1.08878600  | -4.24953300 |
| H  | 3.22826400  | -0.67002600 | -4.08194200 |
| H  | 1.83464100  | 0.38152900  | -3.76146200 |
| H  | -4.99604000 | -1.82259600 | 1.71136000  |
| H  | -6.21961300 | -0.54153300 | 1.53264900  |
| H  | -6.38414600 | -2.06750800 | 0.63045700  |
| H  | -3.30193900 | 0.86542000  | -3.58631100 |
| H  | -4.86222300 | 1.65688000  | -3.24888300 |
| H  | -3.38869800 | 2.16896500  | -2.38523600 |
| H  | -2.94669800 | 0.90905400  | 3.38106000  |
| H  | -4.51136800 | 0.85217900  | 2.56727600  |
| H  | -3.21631100 | -0.26485300 | 2.10646100  |
| H  | -3.43681400 | 6.20345500  | 0.20189200  |
| H  | -4.63464700 | 5.53375400  | 1.32816800  |
| H  | -3.05118100 | 6.04037000  | 1.91931400  |
| H  | -0.95369300 | 1.98339100  | -2.39310800 |
| H  | -0.19949500 | 3.48134700  | -1.83475400 |
| H  | 0.31438600  | 1.91758700  | -1.16946700 |
| Mo | -0.22327500 | -1.71038100 | 1.69860500  |

#### Mo-int4

127

|    |             |             |             |
|----|-------------|-------------|-------------|
| C  | 2.91554400  | 1.16346100  | -2.93522100 |
| N  | 3.31229300  | 0.17460600  | -1.93145600 |
| O  | -1.84289200 | -1.18121300 | -2.04416900 |
| C  | -5.59889000 | -0.63515900 | 1.37646600  |
| Si | 2.25086100  | -1.02838500 | -1.11672200 |
| C  | 4.62587600  | 0.08879400  | -1.51105200 |
| N  | -4.74671800 | -0.32642100 | 0.24173300  |

|    |             |             |             |
|----|-------------|-------------|-------------|
| Si | -3.21755000 | -1.07693100 | -0.81584900 |
| N  | 4.90377600  | -0.82927200 | -0.65001400 |
| C  | -0.78908800 | -0.69329600 | -1.37844300 |
| C  | -5.09534900 | 0.37668300  | -0.81934800 |
| C  | 6.25288400  | -1.00178400 | -0.14632600 |
| N  | -4.21047500 | 0.08686100  | -1.80132600 |
| C  | -3.94944500 | 0.88405200  | -2.99080200 |
| C  | 5.61633800  | 1.07578200  | -2.04848100 |
| C  | 5.87124500  | 2.24897400  | -1.32672500 |
| C  | 6.31910700  | 0.82078000  | -3.23266900 |
| C  | 6.81696500  | 3.16343600  | -1.79374400 |
| H  | 5.33166200  | 2.43669300  | -0.40295000 |
| C  | 7.26623000  | 1.73674200  | -3.69519500 |
| H  | 6.12221900  | -0.09360300 | -3.78642100 |
| C  | 7.51494900  | 2.90999000  | -2.97769100 |
| H  | 7.01001000  | 4.07287900  | -1.23067800 |
| H  | 7.80954900  | 1.53394400  | -4.61415000 |
| H  | 8.25186200  | 3.62225700  | -3.33892300 |
| C  | -6.22845900 | 1.31360100  | -0.95277600 |
| C  | -7.16378100 | 1.15223200  | -1.98489700 |
| C  | -6.35502500 | 2.38064500  | -0.05129000 |
| C  | -8.22502300 | 2.04878100  | -2.10635000 |
| H  | -7.06526600 | 0.31889400  | -2.67438500 |
| C  | -7.41089900 | 3.28139200  | -0.18609700 |
| H  | -5.60900100 | 2.51477200  | 0.72475200  |
| C  | -8.34760000 | 3.11458600  | -1.21007700 |
| H  | -8.95422300 | 1.91694800  | -2.90031200 |
| H  | -7.50119200 | 4.11336000  | 0.50635500  |
| H  | -9.17163800 | 3.81517400  | -1.31093200 |
| H  | 6.41394000  | -2.06196200 | 0.07906900  |
| H  | 7.03635400  | -0.67654700 | -0.84433100 |
| H  | 6.38568000  | -0.44287700 | 0.78984400  |
| H  | 2.90393000  | 2.18205700  | -2.52570400 |
| H  | 3.60203000  | 1.15305400  | -3.78723600 |



|   |             |             |             |
|---|-------------|-------------|-------------|
| H | 1.92432300  | 0.91339300  | -3.30778100 |
| H | -4.97375600 | -0.91542800 | 2.22678800  |
| H | -6.21554000 | 0.22222200  | 1.66209000  |
| H | -6.26424100 | -1.47885200 | 1.15135600  |
| H | -3.17565200 | 0.37523600  | -3.56721300 |
| H | -4.84715300 | 0.97867000  | -3.60845600 |
| H | -3.59363900 | 1.88653400  | -2.72573900 |
| P | 1.87874000  | -0.37496600 | 0.97972900  |
| P | -1.40607000 | -0.10901300 | 0.23666600  |
| C | -1.86202300 | -1.54794100 | 3.12447400  |
| C | 0.87038700  | -1.85069000 | 3.84644600  |
| C | -0.08417300 | -2.89014500 | 1.31547900  |
| O | 1.43128800  | -2.29025100 | 4.76252500  |
| O | -2.89571500 | -1.80441200 | 3.59373800  |
| O | -0.08084900 | -3.93507200 | 0.81481700  |
| C | -1.83553900 | 1.71411600  | 0.11859900  |
| C | -1.47745300 | 2.55257400  | -0.97233400 |
| C | -2.65805800 | 2.24766700  | 1.14630100  |
| C | -1.95637600 | 3.86962000  | -1.00369200 |
| C | -3.09853600 | 3.57342300  | 1.06216000  |
| C | -2.77380200 | 4.40316500  | -0.00821700 |
| H | -1.67621700 | 4.49843500  | -1.84569000 |
| H | -3.72591400 | 3.96094700  | 1.86313000  |
| C | 3.13518800  | 0.82268200  | 1.57650200  |
| C | 3.00594900  | 2.20471900  | 1.31405600  |
| C | 4.22087900  | 0.35242700  | 2.35357700  |
| C | 3.98191100  | 3.08363900  | 1.80080100  |
| C | 5.17524900  | 1.26694000  | 2.80909200  |
| C | 5.08259800  | 2.63512600  | 2.53467700  |
| H | 3.87916500  | 4.14715100  | 1.59344400  |
| H | 6.01457200  | 0.89925800  | 3.39642300  |
| C | -0.59619100 | 2.14012100  | -2.12997400 |
| C | -3.31933500 | 5.80715100  | -0.10009800 |
| C | -3.11003200 | 1.47709300  | 2.36705600  |

|    |             |             |             |
|----|-------------|-------------|-------------|
| C  | 1.85576300  | 2.76056600  | 0.50913900  |
| C  | 4.36685000  | -1.10936500 | 2.70446000  |
| C  | 6.15732900  | 3.59267600  | 2.99176700  |
| H  | 1.86986900  | 3.85511500  | 0.50284300  |
| H  | 1.91196100  | 2.42100400  | -0.52932900 |
| H  | 0.88383500  | 2.44045800  | 0.89865600  |
| H  | 6.58620300  | 3.28707400  | 3.95240800  |
| H  | 6.98137300  | 3.63005100  | 2.26612600  |
| H  | 5.76964900  | 4.61138200  | 3.09925400  |
| H  | 3.57267800  | -1.43710900 | 3.38443400  |
| H  | 4.30793100  | -1.73428900 | 1.80820200  |
| H  | 5.32710600  | -1.30084500 | 3.19426600  |
| H  | 0.37369400  | 1.78247500  | -1.78654100 |
| H  | -1.03226400 | 1.34093800  | -2.73576700 |
| H  | -0.42022900 | 2.99593300  | -2.78895800 |
| H  | -2.72872000 | 6.42557500  | -0.78354200 |
| H  | -4.35260400 | 5.79766600  | -0.47248300 |
| H  | -3.33236600 | 6.29645000  | 0.88015800  |
| H  | -4.09453300 | 1.82821000  | 2.69336300  |
| H  | -3.18910700 | 0.40956000  | 2.19107300  |
| H  | -2.41918300 | 1.62183800  | 3.20333900  |
| Si | 2.92299800  | -3.23498500 | -1.61288800 |
| Si | -3.83509800 | -3.34480600 | -0.72357500 |
| C  | -3.80250300 | -3.96290000 | 1.06707900  |
| C  | -2.64140100 | -4.35337300 | -1.78457100 |
| C  | -5.60347300 | -3.45100700 | -1.41178400 |
| C  | 3.60820600  | -4.08107300 | -0.06220900 |
| C  | 1.42627300  | -4.20910600 | -2.25585400 |
| C  | 4.23020400  | -3.17106800 | -2.98839000 |
| H  | -2.95035000 | -5.40526900 | -1.83038600 |
| H  | -2.58696200 | -3.96157600 | -2.80570600 |
| H  | -1.63167500 | -4.31363300 | -1.36403100 |
| H  | -2.78192400 | -3.96421200 | 1.46272200  |
| H  | -4.41623300 | -3.34905100 | 1.73386700  |

|    |             |             |             |
|----|-------------|-------------|-------------|
| H  | -4.17948000 | -4.99271000 | 1.11144300  |
| H  | -5.95697500 | -4.48972800 | -1.40128000 |
| H  | -6.30435100 | -2.85270200 | -0.81802700 |
| H  | -5.64804900 | -3.09041200 | -2.44600600 |
| H  | 2.86533000  | -4.07844900 | 0.74403800  |
| H  | 3.87539400  | -5.12504200 | -0.26978500 |
| H  | 4.50138800  | -3.56063900 | 0.29734000  |
| H  | 0.70013700  | -4.38718700 | -1.45762600 |
| H  | 0.92213400  | -3.65730500 | -3.05607200 |
| H  | 1.74224600  | -5.18462000 | -2.64782500 |
| H  | 5.12311900  | -2.63511500 | -2.65353100 |
| H  | 4.52265100  | -4.18506300 | -3.29062800 |
| H  | 3.83090800  | -2.65736700 | -3.87063500 |
| C  | 0.51406200  | -0.87487700 | -1.96389500 |
| O  | 0.63128600  | -1.00969500 | -3.20873700 |
| C  | 0.05159000  | 0.77026900  | 3.16722200  |
| O  | 0.19202700  | 1.80548800  | 3.66127900  |
| Mo | -0.09594100 | -1.07273200 | 2.26170800  |

**Mo-int5**

127

|    |             |             |             |
|----|-------------|-------------|-------------|
| C  | 2.17247900  | 4.48128600  | 1.33255900  |
| N  | 1.11248900  | 3.60362800  | 0.86636500  |
| O  | 0.88172800  | 0.12821000  | 1.77558600  |
| C  | 4.19776700  | -3.42395000 | -0.01154300 |
| Si | -1.08174100 | 1.80993500  | 0.89873900  |
| C  | 0.19820300  | 4.03260900  | 0.05954800  |
| N  | 3.62578500  | -2.13752800 | 0.34210700  |
| Si | 2.12294100  | -1.32581700 | 1.26980700  |
| N  | -0.85033600 | 3.17970200  | -0.22558900 |
| C  | 0.25945700  | 0.40012500  | 0.68973300  |
| C  | 4.28218400  | -0.98778100 | 0.41988100  |
| C  | -1.74438400 | 3.44428300  | -1.36362100 |
| N  | 3.47714400  | -0.12114600 | 1.07261900  |
| C  | 3.65863000  | 1.31269500  | 1.23063200  |

|   |             |             |             |
|---|-------------|-------------|-------------|
| C | 0.17855700  | 5.39249400  | -0.56671300 |
| C | 1.19938100  | 5.77989400  | -1.44430700 |
| C | -0.85168600 | 6.29393200  | -0.26460600 |
| C | 1.18688600  | 7.05102200  | -2.02057200 |
| H | 1.99768500  | 5.07987000  | -1.67562100 |
| C | -0.85472500 | 7.56943200  | -0.82940700 |
| H | -1.64320600 | 5.99133500  | 0.41469200  |
| C | 0.16134000  | 7.94828000  | -1.71158100 |
| H | 1.97697700  | 7.34111200  | -2.70770300 |
| H | -1.65208000 | 8.26563100  | -0.58486900 |
| H | 0.15343900  | 8.93934300  | -2.15672900 |
| C | 5.61700700  | -0.68823100 | -0.12257200 |
| C | 6.57003700  | -0.00327000 | 0.64621500  |
| C | 5.92107100  | -1.07656100 | -1.43708000 |
| C | 7.82429600  | 0.27751100  | 0.10623100  |
| H | 6.33371600  | 0.29042100  | 1.66420000  |
| C | 7.17132000  | -0.77821800 | -1.97557700 |
| H | 5.16688900  | -1.57405200 | -2.03755800 |
| C | 8.12436000  | -0.10641200 | -1.20420600 |
| H | 8.56579200  | 0.79677800  | 0.70592700  |
| H | 7.40098200  | -1.06951000 | -2.99640700 |
| H | 9.10020300  | 0.11988500  | -1.62422500 |
| H | -2.59933500 | 4.06460700  | -1.07564800 |
| H | -1.19911300 | 3.94519300  | -2.16716500 |
| H | -2.12619900 | 2.49545800  | -1.74646500 |
| H | 3.09899700  | 4.30048900  | 0.76873600  |
| H | 1.94224300  | 5.55217100  | 1.25923400  |
| H | 2.38859600  | 4.25132600  | 2.38201600  |
| H | 3.59547100  | -4.21324300 | 0.44570000  |
| H | 4.19475200  | -3.58234300 | -1.09443400 |
| H | 5.22731600  | -3.51369500 | 0.35158500  |
| H | 2.68091800  | 1.79280900  | 1.28339500  |
| H | 4.20706300  | 1.54385900  | 2.15121000  |
| H | 4.21043200  | 1.72600900  | 0.38053200  |

|   |             |             |             |
|---|-------------|-------------|-------------|
| P | -3.04561300 | -0.15297400 | -0.69787100 |
| P | 0.58221700  | -1.09597200 | -0.41987400 |
| C | -0.68269800 | -4.05606300 | 0.06990600  |
| C | -3.40119600 | -3.28378900 | -0.01098500 |
| C | -1.63906200 | -1.94342300 | 1.81460000  |
| O | -4.41399200 | -3.83789200 | 0.09561400  |
| O | -0.12215400 | -5.07414500 | 0.19985100  |
| O | -1.64197700 | -1.72779500 | 2.95659300  |
| C | 1.58640100  | -0.86062600 | -1.96125600 |
| C | 1.97399700  | 0.40243700  | -2.46503300 |
| C | 2.07958800  | -2.03957000 | -2.57844600 |
| C | 2.88160600  | 0.46447000  | -3.52740000 |
| C | 2.98550300  | -1.91910600 | -3.63963900 |
| C | 3.41604900  | -0.68086300 | -4.11934700 |
| H | 3.17594500  | 1.44220500  | -3.90248900 |
| H | 3.36217200  | -2.82792700 | -4.10419500 |
| C | -4.85621700 | -0.44032000 | -0.92073100 |
| C | -5.36773500 | -0.49772200 | -2.24106500 |
| C | -5.72963400 | -0.68389400 | 0.16863600  |
| C | -6.72120400 | -0.78565500 | -2.44545700 |
| C | -7.07720000 | -0.96517700 | -0.08577800 |
| C | -7.59547400 | -1.01926700 | -1.38102700 |
| H | -7.10341800 | -0.82722400 | -3.46404000 |
| H | -7.73977500 | -1.15642300 | 0.75667100  |
| C | 1.42100900  | 1.68967000  | -1.91946400 |
| C | 4.44370300  | -0.57791100 | -5.21996100 |
| C | 1.66436800  | -3.43517000 | -2.17180100 |
| C | -4.49141700 | -0.26059000 | -3.45422100 |
| C | -5.26128500 | -0.65440600 | 1.60341700  |
| C | -9.06126600 | -1.29541200 | -1.62199800 |
| H | -5.08940900 | -0.27105100 | -4.37186500 |
| H | -3.97323100 | 0.70331400  | -3.39502400 |
| H | -3.71699000 | -1.02920400 | -3.55613300 |
| H | -9.47908300 | -1.94732900 | -0.84670500 |

|    |             |             |             |
|----|-------------|-------------|-------------|
| H  | -9.64615800 | -0.36533400 | -1.61372000 |
| H  | -9.22570700 | -1.77371600 | -2.59393700 |
| H  | -4.35542100 | -1.25235600 | 1.74512900  |
| H  | -5.01725800 | 0.36934000  | 1.90330400  |
| H  | -6.03415300 | -1.04085700 | 2.27572400  |
| H  | 0.32923300  | 1.69941300  | -1.96331400 |
| H  | 1.70201200  | 1.86277800  | -0.87592100 |
| H  | 1.78024600  | 2.54839000  | -2.49544100 |
| H  | 4.20173700  | 0.22939900  | -5.91982500 |
| H  | 5.43618400  | -0.35729100 | -4.80370400 |
| H  | 4.52223600  | -1.51055000 | -5.78759300 |
| H  | 2.32312700  | -4.17885200 | -2.62989200 |
| H  | 1.68754100  | -3.59636300 | -1.09275300 |
| H  | 0.64433500  | -3.65268200 | -2.49847000 |
| Si | -1.17472700 | 2.53937900  | 3.13942600  |
| Si | 2.10713000  | -2.55275000 | 3.28400900  |
| C  | 3.93285900  | -2.94552400 | 3.62981700  |
| C  | 1.11373200  | -4.14981600 | 3.12111700  |
| C  | 1.40158900  | -1.46272600 | 4.65561000  |
| C  | -2.52121400 | 1.52637900  | 4.00619700  |
| C  | 0.44908800  | 2.35627300  | 4.09576000  |
| C  | -1.68906900 | 4.36605600  | 3.07774500  |
| H  | 1.23784800  | -4.75040800 | 4.03129000  |
| H  | 0.04749900  | -3.93812400 | 2.99809700  |
| H  | 1.42815300  | -4.75596200 | 2.26615400  |
| H  | 4.33667500  | -3.65860000 | 2.90292100  |
| H  | 4.55286400  | -2.04176500 | 3.59631800  |
| H  | 4.03895600  | -3.38753400 | 4.62842300  |
| H  | 1.39721300  | -2.01040400 | 5.60652300  |
| H  | 1.99669900  | -0.55309900 | 4.79147400  |
| H  | 0.37323700  | -1.16918200 | 4.42505300  |
| H  | -2.26520200 | 0.46160500  | 4.02652300  |
| H  | -2.65675600 | 1.86587400  | 5.04116300  |
| H  | -3.47217000 | 1.63217700  | 3.47480300  |

|    |             |             |             |
|----|-------------|-------------|-------------|
| H  | 0.70262100  | 1.30049200  | 4.21952900  |
| H  | 1.27453600  | 2.84209200  | 3.56867900  |
| H  | 0.35595900  | 2.80888100  | 5.09148200  |
| H  | -2.62085700 | 4.47837000  | 2.51205900  |
| H  | -1.85425400 | 4.75787500  | 4.08955800  |
| H  | -0.91740500 | 4.97850300  | 2.59864200  |
| C  | -2.85605400 | 1.20229600  | 0.44105900  |
| O  | -3.71447900 | 2.00090100  | 0.86695000  |
| C  | -1.70796800 | -2.60751800 | -2.23008500 |
| O  | -1.74712800 | -2.76157100 | -3.37684100 |
| Mo | -1.63595800 | -2.33322600 | -0.18966900 |

**Mo-ts3**

|    |             |             |             |
|----|-------------|-------------|-------------|
| C  | 0.73268100  | 4.23462100  | 1.74013000  |
| N  | -0.21639500 | 3.52946400  | 0.91650500  |
| O  | 1.23582500  | 1.11780200  | 1.52714100  |
| Si | -1.38109500 | 1.78289700  | 0.79454000  |
| C  | -0.89096600 | 4.00168600  | -0.10875100 |
| N  | 3.96149700  | -1.55107200 | 1.02394000  |
| Si | 2.45325800  | -0.43287000 | 1.47199100  |
| N  | -1.69824000 | 3.01569100  | -0.56233100 |
| C  | 0.33750300  | 0.85778000  | 0.66005900  |
| C  | 4.62643500  | -0.48549000 | 0.59575900  |
| C  | -2.67403200 | 3.10699700  | -1.63251700 |
| N  | 3.82027300  | 0.57735300  | 0.82056000  |
| H  | -2.97915900 | 4.14553100  | -1.79250400 |
| H  | -2.27633700 | 2.71029800  | -2.57593400 |
| H  | -3.55818700 | 2.52413300  | -1.36507100 |
| H  | 1.23812100  | 5.04000900  | 1.19245300  |
| H  | 0.25216700  | 4.67497100  | 2.62518600  |
| H  | 1.48094500  | 3.51851100  | 2.09327100  |
| P  | -2.66766600 | -0.81435200 | -0.94828200 |
| P  | 0.87349600  | -0.79130600 | -0.16620900 |
| C  | 0.43503400  | -3.88618500 | 0.68080000  |
| C  | -2.38175500 | -3.93445100 | 0.16176700  |

|   |             |             |             |
|---|-------------|-------------|-------------|
| C | -1.27188000 | -1.98514000 | 1.92932500  |
| O | -3.23967900 | -4.71009700 | 0.25357500  |
| O | 1.25823500  | -4.61954600 | 1.08011400  |
| O | -1.49298300 | -1.68285800 | 3.02923200  |
| C | 1.86922400  | -0.42990700 | -1.71235300 |
| C | 1.85095900  | 0.81271700  | -2.38993500 |
| C | 2.72733300  | -1.45709200 | -2.18747800 |
| C | 2.73374100  | 1.02742200  | -3.45711600 |
| C | 3.58857700  | -1.18790000 | -3.25651400 |
| C | 3.62540700  | 0.04970700  | -3.89806400 |
| H | 2.71176400  | 1.99108000  | -3.96133200 |
| H | 4.25461600  | -1.97959900 | -3.59377100 |
| C | -4.35328700 | -1.54298300 | -1.19936400 |
| C | -4.71745800 | -1.82705400 | -2.54161100 |
| C | -5.23804800 | -1.91104800 | -0.15663400 |
| C | -5.94879700 | -2.43043300 | -2.81267700 |
| C | -6.46152200 | -2.51341900 | -0.47860800 |
| C | -6.84239200 | -2.77501900 | -1.79483600 |
| H | -6.21659700 | -2.64065500 | -3.84682800 |
| H | -7.13192000 | -2.79657300 | 0.33125100  |
| C | 0.89527900  | 1.92537700  | -2.04472300 |
| C | 2.74863700  | -2.87106700 | -1.65296700 |
| C | -3.80123400 | -1.51215800 | -3.70847600 |
| C | -4.92534500 | -1.69340800 | 1.30377700  |
| C | -8.18307100 | -3.39492200 | -2.11229900 |
| H | -4.28465400 | -1.76657700 | -4.65780500 |
| H | -3.52895700 | -0.45084900 | -3.73898000 |
| H | -2.86270700 | -2.07731700 | -3.65411700 |
| H | -8.54089600 | -4.02110100 | -1.28761700 |
| H | -8.94456200 | -2.62284800 | -2.28899000 |
| H | -8.13534500 | -4.01494900 | -3.01459100 |
| H | -3.87341900 | -1.88569000 | 1.52590300  |
| H | -5.12154200 | -0.65685200 | 1.59207000  |
| H | -5.53347500 | -2.35020800 | 1.93432900  |



|    |             |             |             |
|----|-------------|-------------|-------------|
| H  | -0.13387000 | 1.56386800  | -1.97657300 |
| H  | 1.13631400  | 2.40788700  | -1.09114400 |
| H  | 0.92129500  | 2.70537200  | -2.81205800 |
| H  | 3.75851600  | -3.28808500 | -1.71381900 |
| H  | 2.41396300  | -2.95509000 | -0.62426800 |
| H  | 2.09052100  | -3.50882500 | -2.25323000 |
| Si | -3.56624000 | 2.24954600  | 2.18280000  |
| Si | 2.25544200  | -0.91091400 | 3.77105500  |
| C  | -3.37761300 | 1.08644800  | 3.66841500  |
| C  | -2.93717500 | 4.00666900  | 2.68462000  |
| C  | -5.42348200 | 2.66079000  | 1.96510700  |
| H  | -3.44819200 | 0.03773300  | 3.36605500  |
| H  | -2.40415500 | 1.22597600  | 4.15218300  |
| H  | -4.16428100 | 1.28097100  | 4.40971300  |
| H  | -1.94991400 | 3.95522600  | 3.15529600  |
| H  | -2.86114700 | 4.66982500  | 1.81415600  |
| H  | -3.64811600 | 4.46620600  | 3.38564300  |
| H  | -6.02909900 | 1.75980900  | 1.81726100  |
| H  | -5.80438300 | 3.19852000  | 2.84299600  |
| H  | -5.58290200 | 3.30697300  | 1.09123000  |
| C  | -2.72842500 | 0.51718300  | 0.15878700  |
| O  | -3.80653800 | 1.05132800  | 0.66888200  |
| C  | -0.61304100 | -3.13725100 | -1.95016800 |
| O  | -0.47016900 | -3.44741300 | -3.05679000 |
| C  | 4.59083500  | 0.30415200  | -5.03039900 |
| H  | 4.55233900  | 1.34466800  | -5.36771100 |
| H  | 5.62108700  | 0.08291200  | -4.72439700 |
| H  | 4.36865800  | -0.33695900 | -5.89234700 |
| C  | 5.95878700  | -0.44746100 | -0.03488600 |
| C  | 7.05438400  | -1.08608400 | 0.56522300  |
| C  | 6.11931200  | 0.20914200  | -1.26597100 |
| C  | 8.30182300  | -1.05921600 | -0.05787600 |
| H  | 6.93468000  | -1.58406900 | 1.52203900  |
| C  | 7.36602100  | 0.21956800  | -1.88920600 |

|   |             |             |             |
|---|-------------|-------------|-------------|
| H | 5.26650600  | 0.67499500  | -1.74661000 |
| C | 8.45806900  | -0.41046900 | -1.28571300 |
| H | 9.14982200  | -1.54603000 | 0.41438300  |
| H | 7.48326100  | 0.71955600  | -2.84627200 |
| H | 9.42931900  | -0.39684600 | -1.77179200 |
| C | 4.45150700  | -2.90441300 | 1.19341200  |
| C | 3.99481800  | 1.94994000  | 0.38634400  |
| H | 3.60556400  | -3.59414200 | 1.16333800  |
| H | 5.15507900  | -3.17240900 | 0.39887000  |
| H | 4.95471900  | -3.02461300 | 2.16164600  |
| H | 3.43373500  | 2.60199600  | 1.05813800  |
| H | 5.05163300  | 2.23046000  | 0.41945800  |
| H | 3.62091300  | 2.09914300  | -0.63372400 |
| C | 3.98543800  | -0.58258400 | 4.48572700  |
| C | 0.97071900  | 0.22444900  | 4.56411300  |
| C | 1.80749800  | -2.73496300 | 3.99385900  |
| H | 3.99861000  | -0.79102400 | 5.56289400  |
| H | 4.73827300  | -1.22322300 | 4.01105400  |
| H | 4.29123200  | 0.45990900  | 4.34049300  |
| H | -0.02680300 | 0.02646400  | 4.15916900  |
| H | 0.93490600  | 0.06317500  | 5.64889100  |
| H | 1.20586400  | 1.27802600  | 4.37891300  |
| H | 0.80987300  | -2.95093400 | 3.60147300  |
| H | 2.51528900  | -3.39736100 | 3.48456400  |
| H | 1.81283400  | -2.98940700 | 5.06143900  |
| C | -0.81918900 | 5.36764200  | -0.67365700 |
| C | -0.92389100 | 6.48551600  | 0.16903900  |
| C | -0.63149600 | 5.55928400  | -2.05186400 |
| C | -0.84682200 | 7.77333400  | -0.36112700 |
| H | -1.08595100 | 6.34115400  | 1.23245700  |
| C | -0.54409100 | 6.84833000  | -2.57629900 |
| H | -0.54756800 | 4.69733700  | -2.70660300 |
| C | -0.65332200 | 7.95745000  | -1.73274000 |
| H | -0.94020500 | 8.63262100  | 0.29684100  |

|    |             |             |             |
|----|-------------|-------------|-------------|
| H  | -0.39355600 | 6.98704900  | -3.64318400 |
| H  | -0.59018600 | 8.96126500  | -2.14334100 |
| Mo | -0.89377400 | -2.58352400 | 0.01416500  |

**Mo-int6**

127

|    |             |             |             |
|----|-------------|-------------|-------------|
| C  | -3.20379100 | 2.77191900  | 1.71027100  |
| N  | -2.39674100 | 2.68366600  | 0.50899600  |
| O  | 1.31350500  | 1.86888400  | -0.95990500 |
| C  | 5.07515600  | 0.09194000  | 2.11751200  |
| Si | -1.40481100 | 1.37339500  | -0.47501800 |
| C  | -2.40822700 | 3.47978500  | -0.55825900 |
| N  | 4.33566400  | 0.46628400  | 0.92711900  |
| Si | 2.56569700  | 1.35364700  | 0.18585100  |
| N  | -1.80164600 | 2.79862400  | -1.55453600 |
| C  | 0.28552400  | 0.95971800  | -0.60165800 |
| C  | 4.86165800  | 0.69960500  | -0.25015500 |
| C  | -1.13514700 | 3.33991300  | -2.72943500 |
| N  | 3.94300200  | 1.34791200  | -1.00926500 |
| C  | 3.93743700  | 1.38490300  | -2.46488700 |
| C  | -2.95761400 | 4.83886800  | -0.63811100 |
| C  | -2.76588600 | 5.72875100  | 0.43230400  |
| C  | -3.66629800 | 5.25736500  | -1.77684100 |
| C  | -3.27842100 | 7.02247900  | 0.36094300  |
| H  | -2.19455900 | 5.40895500  | 1.29816300  |
| C  | -4.18780000 | 6.54821600  | -1.83504500 |
| H  | -3.82192400 | 4.56347500  | -2.59641100 |
| C  | -3.99316000 | 7.43182500  | -0.76891800 |
| H  | -3.11940700 | 7.71143300  | 1.18519000  |
| H  | -4.74517100 | 6.86540700  | -2.71148500 |
| H  | -4.39654000 | 8.43914500  | -0.81938000 |
| C  | 6.21690300  | 0.34072200  | -0.72758100 |
| C  | 7.09265900  | 1.33551200  | -1.18418900 |
| C  | 6.61558900  | -1.00319500 | -0.74438700 |
| C  | 8.36446700  | 0.98804600  | -1.63994000 |

|   |             |             |             |
|---|-------------|-------------|-------------|
| H | 6.77625400  | 2.37471200  | -1.16972000 |
| C | 7.88436300  | -1.34662900 | -1.21130800 |
| H | 5.91877900  | -1.76893800 | -0.42024200 |
| C | 8.76078000  | -0.35246000 | -1.65500700 |
| H | 9.04441800  | 1.76171700  | -1.98512900 |
| H | 8.18707500  | -2.38973000 | -1.23123900 |
| H | 9.74977700  | -0.62168700 | -2.01527500 |
| H | -1.58436000 | 2.93715100  | -3.64373600 |
| H | -1.21367000 | 4.43042700  | -2.75126300 |
| H | -0.07825100 | 3.05846700  | -2.69575100 |
| H | -2.59668600 | 3.08141000  | 2.56604700  |
| H | -4.03182500 | 3.47612900  | 1.58236200  |
| H | -3.61138400 | 1.77975300  | 1.93279200  |
| H | 4.39297100  | -0.38296700 | 2.82680500  |
| H | 5.88751500  | -0.60783800 | 1.89282600  |
| H | 5.51082400  | 0.97512400  | 2.60468000  |
| H | 3.07308000  | 1.97189900  | -2.77724400 |
| H | 4.84926600  | 1.85210600  | -2.85101500 |
| H | 3.84471100  | 0.37851600  | -2.89140300 |
| P | -2.25064400 | -1.36996500 | 0.61379200  |
| P | 1.11429000  | -0.44297000 | 0.20213100  |
| C | 1.40941700  | -1.56853900 | 3.30511800  |
| C | -1.31916000 | -2.19645700 | 3.71828300  |
| C | -0.58124400 | 0.41546100  | 2.89622600  |
| O | -1.90823900 | -2.62084000 | 4.63209600  |
| O | 2.38431300  | -1.59072000 | 3.94527500  |
| O | -0.78543000 | 1.46433300  | 3.35203900  |
| C | 1.95806500  | -1.52517000 | -1.10432100 |
| C | 1.70927600  | -1.45385600 | -2.50122000 |
| C | 2.96692800  | -2.41717600 | -0.64664100 |
| C | 2.47530400  | -2.24037500 | -3.37599100 |
| C | 3.70367000  | -3.17348500 | -1.56420500 |
| C | 3.48465100  | -3.09591600 | -2.93901200 |
| H | 2.27218800  | -2.17020200 | -4.44300200 |

|    |             |             |             |
|----|-------------|-------------|-------------|
| H  | 4.47292700  | -3.84567700 | -1.18663700 |
| C  | -3.27195200 | -2.80674500 | 0.09697200  |
| C  | -3.00250300 | -3.48236600 | -1.11670600 |
| C  | -4.31936100 | -3.25232000 | 0.93684200  |
| C  | -3.81667700 | -4.55993100 | -1.48398900 |
| C  | -5.10842400 | -4.33067200 | 0.52326800  |
| C  | -4.88101100 | -4.99156600 | -0.68747000 |
| H  | -3.60731000 | -5.08067200 | -2.41633000 |
| H  | -5.91997800 | -4.66530400 | 1.16640700  |
| C  | 0.67339300  | -0.55843300 | -3.14717700 |
| C  | 4.32792900  | -3.88895900 | -3.90854200 |
| C  | 3.29288900  | -2.62800700 | 0.81560700  |
| C  | -1.87006000 | -3.07665400 | -2.03131800 |
| C  | -4.60343900 | -2.61012300 | 2.27777500  |
| C  | -5.77100700 | -6.12880000 | -1.13030500 |
| H  | -1.69705000 | -3.83735300 | -2.79882600 |
| H  | -2.10428900 | -2.13337900 | -2.53567400 |
| H  | -0.93010500 | -2.93188000 | -1.48754000 |
| H  | -6.17692800 | -6.67793600 | -0.27391400 |
| H  | -6.62447900 | -5.75555000 | -1.71240000 |
| H  | -5.22949600 | -6.83793300 | -1.76557400 |
| H  | -3.83679900 | -2.87289600 | 3.01394500  |
| H  | -4.62505500 | -1.51709700 | 2.21450400  |
| H  | -5.56920500 | -2.94223300 | 2.67183400  |
| H  | -0.31830000 | -0.70026500 | -2.71775900 |
| H  | 0.92235800  | 0.49805200  | -3.01154600 |
| H  | 0.61877400  | -0.76823200 | -4.22107400 |
| H  | 3.85867500  | -3.94772300 | -4.89623700 |
| H  | 5.31578200  | -3.42675400 | -4.03927500 |
| H  | 4.49578700  | -4.91124700 | -3.55013600 |
| H  | 4.31183700  | -3.01311900 | 0.93230000  |
| H  | 3.21763500  | -1.71345400 | 1.39641900  |
| H  | 2.61643400  | -3.35887400 | 1.26921800  |
| Si | -5.02158200 | 0.07518000  | -1.76189600 |

|               |             |             |             |
|---------------|-------------|-------------|-------------|
| Si            | 2.47795900  | 3.02313300  | 1.83348300  |
| C             | 3.98206500  | 4.15753900  | 1.55759900  |
| C             | 2.58628000  | 2.29990500  | 3.58478900  |
| C             | 0.87908600  | 4.02489300  | 1.62302200  |
| C             | -5.20247700 | 1.86218500  | -2.33026000 |
| C             | -5.57580500 | -1.14596200 | -3.07240900 |
| C             | -5.91009500 | -0.17634900 | -0.12710700 |
| H             | 2.37834100  | 3.07772000  | 4.33083600  |
| H             | 1.86854000  | 1.48934600  | 3.73918300  |
| H             | 3.58686100  | 1.90269800  | 3.78495200  |
| H             | 4.91679400  | 3.58797200  | 1.63004300  |
| H             | 3.95317100  | 4.62528300  | 0.56645000  |
| H             | 4.01620800  | 4.95711100  | 2.30870500  |
| H             | 0.85804800  | 4.88748800  | 2.30169100  |
| H             | 0.79050100  | 4.38884800  | 0.59315400  |
| H             | 0.00601600  | 3.39909100  | 1.83187300  |
| H             | -4.54015700 | 2.07236600  | -3.17798500 |
| H             | -6.23331600 | 2.07430400  | -2.64032500 |
| H             | -4.94741600 | 2.55812600  | -1.52328600 |
| H             | -6.64377300 | -1.03921700 | -3.29738100 |
| H             | -5.01701200 | -1.00477600 | -4.00485500 |
| H             | -5.39621200 | -2.16936100 | -2.72211600 |
| H             | -5.38802900 | 0.33907600  | 0.68760500  |
| H             | -6.92917900 | 0.22604000  | -0.17936700 |
| H             | -5.97004100 | -1.23816400 | 0.12831400  |
| C             | -2.49838700 | -0.14544000 | -0.54194700 |
| O             | -3.36752200 | -0.25661300 | -1.58638700 |
| C             | 0.01538900  | -3.38752800 | 1.47133300  |
| O             | 0.13258300  | -4.46250900 | 1.05823600  |
| Mo            | -0.24550600 | -1.47843100 | 2.19698500  |
| <b>Mo-ts4</b> |             |             |             |
| N             | -0.79735900 | 2.75514200  | 0.83442900  |
| O             | 1.45716300  | 1.38670600  | 0.10958800  |
| Si            | -0.49425400 | 1.38496900  | -0.43128300 |

|    |             |             |             |
|----|-------------|-------------|-------------|
| C  | -0.81603800 | 3.64931300  | -0.14461100 |
| N  | 3.98580700  | 0.21158300  | -0.42825800 |
| Si | 2.55051100  | 0.23069600  | 0.64682800  |
| N  | -0.52033800 | 2.98743100  | -1.28289400 |
| C  | 0.64850100  | 0.16846600  | -1.01882000 |
| C  | 4.79296300  | 1.28521500  | -0.08496200 |
| N  | 4.26716000  | 2.11013500  | 0.76078600  |
| P  | -2.55635000 | -0.85865500 | 0.01475400  |
| P  | 1.01604400  | -1.35699500 | -0.11083200 |
| C  | 0.23394000  | -3.61062200 | 2.32207300  |
| C  | -2.56205100 | -3.17746400 | 2.16662400  |
| C  | -0.79774900 | -0.93419300 | 2.62917000  |
| O  | -3.49751700 | -3.61395500 | 2.70476800  |
| O  | 0.91064600  | -4.31687600 | 2.95496500  |
| O  | -0.73557700 | -0.07674100 | 3.41284500  |
| C  | 1.77133900  | -2.57778400 | -1.28408900 |
| C  | 1.19786900  | -2.80674000 | -2.55767000 |
| C  | 2.84221900  | -3.39214500 | -0.84895300 |
| C  | 1.74530200  | -3.79828400 | -3.38013700 |
| C  | 3.34944700  | -4.37680100 | -1.70309800 |
| C  | 2.82497200  | -4.58861400 | -2.98028700 |
| H  | 1.30102900  | -3.96743600 | -4.35935800 |
| H  | 4.17535900  | -4.99628600 | -1.35824900 |
| C  | -4.36608600 | -1.14495000 | 0.04798600  |
| C  | -4.94315300 | -2.02446400 | -0.89469500 |
| C  | -5.16894000 | -0.54592600 | 1.04541500  |
| C  | -6.32231100 | -2.25614200 | -0.84792000 |
| C  | -6.54055800 | -0.81412700 | 1.05736200  |
| C  | -7.13894900 | -1.65565500 | 0.11471700  |
| H  | -6.76838600 | -2.92665900 | -1.57963500 |
| H  | -7.15964000 | -0.35368000 | 1.82475300  |
| C  | -0.00594500 | -2.04110600 | -3.06290300 |
| C  | 3.47215200  | -3.22543200 | 0.51631800  |
| C  | -4.11046200 | -2.73746100 | -1.93832100 |

|    |             |             |             |
|----|-------------|-------------|-------------|
| C  | -4.58334600 | 0.37351300  | 2.09305100  |
| H  | -4.74835700 | -3.24582100 | -2.66791000 |
| H  | -3.45478400 | -2.05211700 | -2.48725500 |
| H  | -3.46303000 | -3.49406200 | -1.48113100 |
| H  | -3.74200000 | -0.09512600 | 2.61693600  |
| H  | -4.21206000 | 1.29559500  | 1.63203700  |
| H  | -5.33539200 | 0.64311200  | 2.84102100  |
| H  | -0.82524200 | -2.05736500 | -2.33490600 |
| H  | 0.23269200  | -0.98746800 | -3.23782500 |
| H  | -0.37920300 | -2.47905800 | -3.99444300 |
| H  | 4.20592400  | -4.01475100 | 0.70694600  |
| H  | 3.99360500  | -2.26370200 | 0.60638600  |
| H  | 2.72632800  | -3.27108300 | 1.31479100  |
| Si | -4.17573700 | 2.02461900  | -2.03469000 |
| Si | 3.18884800  | 0.07762500  | 2.91935900  |
| C  | -2.30183000 | 0.76344400  | -0.41665200 |
| O  | -3.30869500 | 1.66881600  | -0.61216800 |
| C  | -1.06224000 | -3.88648000 | -0.20545500 |
| O  | -1.11324000 | -4.72149500 | -1.00479900 |
| C  | 2.53435700  | -1.45266100 | 3.82703900  |
| C  | 5.08255900  | -0.04998100 | 3.05291400  |
| C  | 2.50272600  | 1.61302800  | 3.79935900  |
| H  | 1.44469800  | -1.50506500 | 3.84526300  |
| H  | 2.90732900  | -2.38580600 | 3.39499300  |
| H  | 2.88348200  | -1.40807800 | 4.86769000  |
| H  | 5.35839100  | -0.24548500 | 4.09717100  |
| H  | 5.44942000  | -0.89258600 | 2.45389800  |
| H  | 5.60786300  | 0.84844400  | 2.72216900  |
| H  | 1.42465800  | 1.48882000  | 3.95386400  |
| H  | 2.96841700  | 1.74550200  | 4.78404700  |
| H  | 2.66111200  | 2.52387100  | 3.21378600  |
| C  | 4.08630000  | -0.39515900 | -1.76547700 |
| C  | 5.01321000  | 3.16204400  | 1.42148300  |
| C  | -0.18098800 | 3.52319500  | -2.58298400 |



|   |             |             |             |
|---|-------------|-------------|-------------|
| C | -1.20299400 | 2.91084400  | 2.21299900  |
| H | -0.70699800 | 4.46492600  | -2.76779100 |
| H | 0.89838000  | 3.69859900  | -2.67088700 |
| H | -0.47142100 | 2.80337900  | -3.35173200 |
| H | -2.20430200 | 2.49362100  | 2.37531500  |
| H | -0.50299200 | 2.36982500  | 2.85188200  |
| H | -1.20707600 | 3.96655000  | 2.49793500  |
| H | 3.10605100  | -0.39051700 | -2.24714600 |
| H | 4.77763300  | 0.18190900  | -2.38384900 |
| H | 4.44494300  | -1.42697700 | -1.71685400 |
| H | 4.79578500  | 3.13325300  | 2.49560500  |
| H | 6.10206800  | 3.10119300  | 1.29128100  |
| H | 4.67955400  | 4.14187500  | 1.05478100  |
| C | -1.15154400 | 5.08228400  | -0.03482600 |
| C | -0.26389400 | 6.05834600  | -0.50927000 |
| C | -2.37570700 | 5.46418000  | 0.53454700  |
| C | -0.59881100 | 7.40868700  | -0.40731100 |
| H | 0.68825800  | 5.76062700  | -0.93755800 |
| C | -2.70937200 | 6.81487100  | 0.62250900  |
| H | -3.06603300 | 4.70161400  | 0.88102500  |
| C | -1.82084800 | 7.78726000  | 0.15477600  |
| H | 0.09385100  | 8.16387000  | -0.76681900 |
| H | -3.66148400 | 7.10775000  | 1.05496300  |
| H | -2.08096400 | 8.83931400  | 0.22808000  |
| C | 6.17713500  | 1.34547100  | -0.64034600 |
| C | 6.65878600  | 2.50967600  | -1.25405600 |
| C | 7.01583800  | 0.22548400  | -0.53421400 |
| C | 7.96170700  | 2.55462600  | -1.75270100 |
| H | 6.00564100  | 3.37241200  | -1.34764000 |
| C | 8.32100800  | 0.27582400  | -1.02127600 |
| H | 6.63629300  | -0.67753900 | -0.06497000 |
| C | 8.79541100  | 1.43996900  | -1.63366100 |
| H | 8.32478900  | 3.45840800  | -2.23408200 |
| H | 8.96691400  | -0.59269700 | -0.92710100 |

|    |             |             |             |
|----|-------------|-------------|-------------|
| H  | 9.81072500  | 1.47670000  | -2.01877700 |
| C  | -5.96624000 | 1.52147800  | -1.78344600 |
| C  | -4.05793700 | 3.88819300  | -2.25852800 |
| C  | -3.37613300 | 1.09555500  | -3.46055400 |
| C  | -8.63108000 | -1.88840400 | 0.12293100  |
| C  | 3.41256600  | -5.63086900 | -3.90240200 |
| H  | -9.15199000 | -1.10568300 | -0.44494600 |
| H  | -8.89067000 | -2.85003800 | -0.33206700 |
| H  | -9.03322400 | -1.87257700 | 1.14171600  |
| H  | 2.65341200  | -6.04455000 | -4.57524800 |
| H  | 4.20503800  | -5.20184600 | -4.53083900 |
| H  | 3.85670400  | -6.45943700 | -3.34000800 |
| H  | -3.81998300 | 1.39780000  | -4.41676100 |
| H  | -2.29849100 | 1.28812300  | -3.51039300 |
| H  | -3.51311400 | 0.01466400  | -3.35322000 |
| H  | -6.58475600 | 1.87406400  | -2.61883800 |
| H  | -6.07188500 | 0.43507200  | -1.70772500 |
| H  | -6.36642800 | 1.95730800  | -0.86090200 |
| H  | -4.45698200 | 4.41552900  | -1.38455400 |
| H  | -3.02182100 | 4.21322800  | -2.39317600 |
| H  | -4.63413300 | 4.21071400  | -3.13460200 |
| Mo | -0.95190100 | -2.42044900 | 1.24117000  |

**Mo-int7**

127

|    |             |             |             |
|----|-------------|-------------|-------------|
| N  | 0.46355900  | 3.43217600  | 0.38924300  |
| O  | 0.53720100  | 0.62239200  | 1.09577800  |
| Si | -0.30611800 | 0.84506400  | -0.35034300 |
| C  | 1.02353200  | 3.15068600  | -0.72859400 |
| N  | 3.27636100  | -0.17524100 | 0.47009900  |
| Si | 1.70842200  | -0.55138900 | 1.25684100  |
| N  | 0.59169700  | 1.98628600  | -1.36477700 |
| C  | -0.35186700 | -0.76116400 | -1.24980100 |
| C  | 3.96080100  | 0.79550100  | 1.19803500  |
| N  | 3.28567400  | 1.32303800  | 2.16022200  |

|   |             |             |             |
|---|-------------|-------------|-------------|
| P | -3.08721700 | -0.04235100 | -0.08968400 |
| P | 0.64967100  | -1.84359500 | -0.41822400 |
| C | -1.25368200 | -4.20291700 | 0.13035400  |
| C | -3.76450700 | -3.04351800 | 0.39001900  |
| C | -1.69617200 | -1.85702500 | 1.93504700  |
| O | -4.81919200 | -3.45920600 | 0.63318500  |
| O | -0.89660200 | -5.30257600 | 0.22613000  |
| O | -1.66280400 | -1.55009300 | 3.05278300  |
| C | 1.53093800  | -3.16805800 | -1.33991900 |
| C | 1.64416100  | -3.16546600 | -2.75589600 |
| C | 2.13454400  | -4.21005400 | -0.59367500 |
| C | 2.31137100  | -4.23073500 | -3.37217400 |
| C | 2.78925200  | -5.24786400 | -1.26205500 |
| C | 2.88159400  | -5.28417000 | -2.65380900 |
| H | 2.38985200  | -4.23249100 | -4.45736100 |
| H | 3.23548300  | -6.04887500 | -0.67648400 |
| C | -4.82436500 | 0.36859400  | 0.29114800  |
| C | -5.81884600 | 0.04195200  | -0.66236400 |
| C | -5.18375400 | 0.98226200  | 1.51510000  |
| C | -7.14781800 | 0.38303300  | -0.39736400 |
| C | -6.52889300 | 1.30408600  | 1.73089500  |
| C | -7.52174100 | 1.02623200  | 0.78688300  |
| H | -7.91084900 | 0.13980800  | -1.13375300 |
| H | -6.80913000 | 1.77729200  | 2.66971000  |
| C | 1.11652800  | -2.06668400 | -3.65115900 |
| C | 2.13632100  | -4.22149800 | 0.91613200  |
| C | -5.47996000 | -0.66603900 | -1.95681900 |
| C | -4.17263500 | 1.28984800  | 2.59620900  |
| H | -6.36246800 | -0.74788200 | -2.59848100 |
| H | -4.70215600 | -0.13884400 | -2.52097400 |
| H | -5.11008700 | -1.68111900 | -1.77098100 |
| H | -3.55328900 | 0.41783600  | 2.83346700  |
| H | -3.49551100 | 2.09188200  | 2.28507800  |
| H | -4.67500800 | 1.60524000  | 3.51580600  |

|    |             |             |             |
|----|-------------|-------------|-------------|
| H  | 0.02765400  | -2.00258700 | -3.62993100 |
| H  | 1.48149300  | -1.08420100 | -3.33671000 |
| H  | 1.43993600  | -2.23939400 | -4.68282800 |
| H  | 2.43833200  | -5.20042500 | 1.29997400  |
| H  | 2.84450200  | -3.48223400 | 1.31309400  |
| H  | 1.15646000  | -3.99155700 | 1.33729900  |
| Si | -3.26466200 | 3.75728700  | -0.79996500 |
| Si | 1.93508700  | -1.27590900 | 3.49531900  |
| C  | -2.10779100 | 1.34049400  | -0.03337800 |
| O  | -2.54054400 | 2.59032500  | 0.20199000  |
| C  | -2.25880900 | -2.53380000 | -2.08183400 |
| O  | -2.45672800 | -2.61690200 | -3.21493100 |
| C  | 1.19820800  | -2.97619200 | 3.91855600  |
| C  | 3.78652200  | -1.42315100 | 3.89771300  |
| C  | 1.05525600  | 0.03653300  | 4.53631400  |
| H  | 0.22518900  | -3.16681700 | 3.46137700  |
| H  | 1.87761400  | -3.78801900 | 3.64089400  |
| H  | 1.06209400  | -3.01755000 | 5.00746600  |
| H  | 3.90888000  | -1.85283400 | 4.90018900  |
| H  | 4.28201500  | -2.09782500 | 3.18828300  |
| H  | 4.30843800  | -0.46409800 | 3.86860900  |
| H  | -0.02691800 | -0.05031300 | 4.39300300  |
| H  | 1.27249600  | -0.10150500 | 5.60321800  |
| H  | 1.35274000  | 1.04659700  | 4.24156100  |
| C  | 3.62097400  | -0.47962700 | -0.92395100 |
| C  | 3.86214500  | 2.20291200  | 3.15539500  |
| C  | 0.71641700  | 1.84152900  | -2.81857800 |
| C  | 0.95856900  | 4.45385600  | 1.28208300  |
| H  | 0.30425900  | 2.71212000  | -3.34445800 |
| H  | 1.75996600  | 1.72026000  | -3.13307200 |
| H  | 0.16141600  | 0.95189400  | -3.12048200 |
| H  | 0.17245900  | 5.20005500  | 1.46106800  |
| H  | 1.18063200  | 3.98863100  | 2.25156800  |
| H  | 1.85983200  | 4.98215300  | 0.93823400  |

|   |             |             |             |
|---|-------------|-------------|-------------|
| H | 2.88363300  | -0.05236800 | -1.61477000 |
| H | 4.59769900  | -0.06113200 | -1.17224700 |
| H | 3.66413200  | -1.55854600 | -1.09066400 |
| H | 3.54819700  | 1.86647000  | 4.15061700  |
| H | 4.95883600  | 2.25866100  | 3.14107300  |
| H | 3.46488600  | 3.21738300  | 3.02172600  |
| C | 2.13104200  | 3.91880000  | -1.38195500 |
| C | 3.37524700  | 3.31112100  | -1.59707000 |
| C | 1.94676200  | 5.25432600  | -1.76301000 |
| C | 4.42358100  | 4.02821300  | -2.17342900 |
| H | 3.51856100  | 2.27883800  | -1.29619400 |
| C | 2.99129900  | 5.96905600  | -2.35296700 |
| H | 0.98199900  | 5.72563800  | -1.59873700 |
| C | 4.23166200  | 5.35872800  | -2.55709600 |
| H | 5.38865200  | 3.54940100  | -2.31471300 |
| H | 2.83732600  | 7.00279200  | -2.65037500 |
| H | 5.04524600  | 5.91740900  | -3.01171300 |
| C | 5.39391700  | 1.06888200  | 0.87559700  |
| C | 5.83215500  | 2.37599700  | 0.62416000  |
| C | 6.32129800  | 0.01590000  | 0.85504200  |
| C | 7.17643000  | 2.62543600  | 0.34261700  |
| H | 5.11490300  | 3.18995300  | 0.63182000  |
| C | 7.66622300  | 0.26851600  | 0.58687600  |
| H | 5.97928100  | -0.99634900 | 1.05152200  |
| C | 8.09537000  | 1.57342700  | 0.32527400  |
| H | 7.50367300  | 3.64111800  | 0.13848600  |
| H | 8.37868700  | -0.55164000 | 0.57894000  |
| H | 9.14221100  | 1.76838400  | 0.10951500  |
| C | -4.49669400 | 4.61631200  | 0.32450300  |
| C | -1.93574800 | 4.93573400  | -1.41616400 |
| C | -4.09750900 | 2.89669400  | -2.24843000 |
| C | -8.95795900 | 1.42299100  | 1.03202800  |
| C | 3.60997900  | -6.40218300 | -3.36019900 |
| H | -9.16159300 | 2.42329500  | 0.62676100  |

|    |             |             |             |
|----|-------------|-------------|-------------|
| H  | -9.65402600 | 0.72877800  | 0.54916900  |
| H  | -9.18947500 | 1.45170100  | 2.10200200  |
| H  | 3.16559600  | -6.61382700 | -4.33862100 |
| H  | 4.66255900  | -6.13880900 | -3.53094900 |
| H  | 3.59561700  | -7.32494100 | -2.77075900 |
| H  | -4.41833700 | 3.63512500  | -2.99354100 |
| H  | -3.40907700 | 2.20039900  | -2.74183100 |
| H  | -4.97694900 | 2.33181300  | -1.92429400 |
| H  | -5.01502800 | 5.43009800  | -0.19697600 |
| H  | -5.24719000 | 3.89958900  | 0.67779300  |
| H  | -3.99477900 | 5.04208100  | 1.20117800  |
| H  | -1.36112900 | 5.34453300  | -0.57910700 |
| H  | -1.23331600 | 4.41540100  | -2.07635900 |
| H  | -2.38215100 | 5.76724400  | -1.97601600 |
| Mo | -1.94027900 | -2.31751500 | -0.04150400 |

**3'**

90

|   |             |             |             |
|---|-------------|-------------|-------------|
| P | 2.50924600  | 1.56867900  | 1.10392700  |
| C | 4.19394100  | 0.81603500  | 0.93376100  |
| C | 4.76654400  | 0.12272700  | 2.02400500  |
| C | 6.05066400  | -0.41760600 | 1.89275300  |
| H | 6.48097700  | -0.96404200 | 2.73031600  |
| C | 6.79424800  | -0.27373800 | 0.71831900  |
| C | 6.22998500  | 0.45434600  | -0.33306000 |
| H | 6.80011600  | 0.58949800  | -1.25027500 |
| C | 4.94772500  | 1.00424600  | -0.24697200 |
| C | 4.02455700  | -0.04836900 | 3.33360600  |
| C | 8.16083100  | -0.90271200 | 0.57867800  |
| C | 4.40305000  | 1.79608600  | -1.41728400 |
| P | -0.94036400 | -1.55889400 | 0.11657800  |
| C | -2.26789000 | -2.80409300 | 0.30568900  |
| C | -2.78637300 | -3.45600500 | -0.83859400 |
| C | -3.83093700 | -4.37136800 | -0.67291400 |
| H | -4.24354000 | -4.85979700 | -1.55319500 |

|    |             |             |             |
|----|-------------|-------------|-------------|
| C  | -4.35742700 | -4.67740900 | 0.58544400  |
| C  | -3.81408900 | -4.03658600 | 1.70303600  |
| H  | -4.20898300 | -4.26619600 | 2.69051100  |
| C  | -2.77812100 | -3.10362000 | 1.59101200  |
| C  | -2.25317700 | -3.20255400 | -2.23287000 |
| C  | -5.46039600 | -5.69738400 | 0.73695400  |
| C  | -2.24825900 | -2.43670700 | 2.84076100  |
| Si | -0.24700300 | 1.25909400  | 0.31861000  |
| N  | -0.79236600 | 2.48952800  | -0.93744600 |
| C  | -1.13793100 | 2.54912700  | -2.34635300 |
| C  | -1.03002600 | 3.39682600  | 0.02506700  |
| C  | -1.52856100 | 4.76662800  | -0.16350400 |
| C  | -2.51616900 | 5.28046000  | 0.69308600  |
| H  | -2.92167000 | 4.65754900  | 1.48314600  |
| C  | -2.99358200 | 6.57569600  | 0.50405100  |
| H  | -3.76543800 | 6.96644500  | 1.16005900  |
| C  | -2.47962400 | 7.36763600  | -0.52683700 |
| H  | -2.84968800 | 8.37886200  | -0.66861200 |
| C  | -1.49050400 | 6.86243800  | -1.37561100 |
| H  | -1.08644800 | 7.48013000  | -2.17182000 |
| C  | -1.01864700 | 5.56281500  | -1.20192500 |
| H  | -0.24172300 | 5.17168000  | -1.85069500 |
| N  | -0.72203500 | 2.80504800  | 1.18970700  |
| C  | -0.58911600 | 3.39835200  | 2.50746000  |
| C  | -1.56049300 | -0.04018800 | 0.55084200  |
| O  | -2.78059600 | 0.27192200  | 1.06110200  |
| Si | -4.29950700 | 0.45482900  | 0.31101300  |
| C  | -5.50750800 | -0.53651500 | 1.34701900  |
| H  | -6.53453600 | -0.41015700 | 0.98289300  |
| H  | -5.48081800 | -0.21654500 | 2.39533800  |
| H  | -5.25784800 | -1.60265900 | 1.31169500  |
| C  | -4.21567100 | -0.15298300 | -1.46334000 |
| H  | -4.21607000 | -1.24589800 | -1.50438600 |
| H  | -3.31186400 | 0.20452200  | -1.96936000 |

|   |             |             |             |
|---|-------------|-------------|-------------|
| H | -5.08240500 | 0.21088900  | -2.02837600 |
| C | -4.68954800 | 2.29546400  | 0.37663200  |
| H | -5.70029100 | 2.50100100  | 0.00324800  |
| H | -3.98502000 | 2.87453400  | -0.23129300 |
| H | -4.63032600 | 2.66872300  | 1.40601000  |
| O | 1.15549800  | -4.43010200 | -2.02117700 |
| O | 0.04398300  | -0.30105400 | -3.52435300 |
| O | 4.20734400  | -1.32082600 | -2.27091100 |
| O | 2.71519000  | -2.68792000 | 1.81580300  |
| C | 1.24090700  | -3.34483500 | -1.59770900 |
| C | 0.54128100  | -0.71357500 | -2.55658800 |
| C | 3.18638100  | -1.33939900 | -1.71600800 |
| C | 2.23108800  | -2.24578700 | 0.86347300  |
| C | 1.43491700  | 0.60222300  | 0.23050800  |
| H | 8.09135600  | -1.88997700 | 0.10254500  |
| H | 8.82350500  | -0.29023800 | -0.04320100 |
| H | 8.64102700  | -1.04361400 | 1.55326600  |
| H | 4.65226700  | -0.55422500 | 4.07457000  |
| H | 3.72226400  | 0.91888000  | 3.75518800  |
| H | 3.11592300  | -0.64559400 | 3.20770900  |
| H | 3.45755900  | 1.37975800  | -1.77680500 |
| H | 4.20969200  | 2.84020300  | -1.13692500 |
| H | 5.11150200  | 1.79716300  | -2.25157900 |
| H | -1.29316700 | -3.70716000 | -2.38171400 |
| H | -2.94993600 | -3.58312400 | -2.98627400 |
| H | -2.09071100 | -2.13928400 | -2.43450900 |
| H | -5.04411000 | -6.70503400 | 0.86764600  |
| H | -6.08475000 | -5.48675100 | 1.61177700  |
| H | -6.10590800 | -5.72460200 | -0.14739100 |
| H | -1.15710800 | -2.51751100 | 2.91274600  |
| H | -2.50076000 | -1.37060100 | 2.85021300  |
| H | -2.67706600 | -2.89516100 | 3.73699700  |
| H | -1.46050300 | 1.56062700  | -2.67805700 |
| H | -1.94550100 | 3.26651800  | -2.51786600 |



|    |             |             |             |
|----|-------------|-------------|-------------|
| H  | -0.27094600 | 2.83608100  | -2.95136600 |
| H  | 0.32257500  | 3.01736300  | 2.97499900  |
| H  | -0.51667100 | 4.48694700  | 2.43598300  |
| H  | -1.44659500 | 3.13861500  | 3.13864600  |
| Mo | 1.37396600  | -1.49013600 | -0.86045700 |

## References

1. J. Bresien, A. Schulz, A. Villinger. *Dalton Trans.*, **2016**, 45(2), 498-501.
2. J. Bresien, K. Faust, C. Hering-Junghans, J. Rothe, A. Schulz, A. Villinger. *Dalton Trans.*, **2016**, 45(5), 1998-2007.
3. Bruker AXS Inc., SAINT v8.37 A, Madison, **2016**.
4. L. Krause, R. Herbst-Irmer, G. M. Sheldrick, D. Stalke, *J. Appl. Crystallogr.* **2015**, 48, 3–10.
5. G. M. Sheldrick, *Acta Crystallogr.*, **2015**, A71, 3–8.
6. G. M. Sheldrick, *Acta Crystallogr. Sect.*, **2015**, C71, 3–8.
7. C. B. Hübschle, G. M. Sheldrick, B. Dittrich, *J. Appl. Cryst.*, **2011**, 44, 1281–1284.
8. Stoe & Cie. X-RED32 and X-Area. Stoe & Cie GmbH, Darmstadt, Germany, **2018**.
9. S. Ishida, T. Abe, F. Hirakawa, T. Kosai, K. Sato, M. Kira, T. Iwamoto, *Chem. Eur. J.* **2015**, 21, 15100–15103.
10. M. M. Linden, H. P. Reisenauer, D. Gerbig, M. Karni, A. Schäfer, T. Müller, Y. Apeloig, P. R Schreiner, *Angew. Chem., Int. Ed.* **2015**, 54, 12404–12409.
11. D. Wendel, D. Reiter, A. Porzelt, P. J. Altmann, S. Inoue, B. Rieger. *J. Am. Chem. Soc.* **2017**, 139, 17193-17198.
12. A. D. Becke, Density-functional thermochemistry. III. The role of exact exchange. *J. Chem. Phys.* **1993**, 98, 5648–5652.
13. C. Lee,; W. Yang,; R. G. Parr, Development of the Colic-Salvetti correlation-energy formula into a functional of the electron density. *Phys. Rev. B* **1988**, 37, 785–789.
14. W. J. Hehre, R. Ditchfield, J. A Pople, Self-Consistent Molecular Orbital Methods. XII. Further Extensions of Gaussian Type Basis Sets for Use in Molecular Orbital Studies of Organic Molecules. *J. Chem. Phys.* **2003**, 56, 2257-2261.
15. S. Grimme, S. Ehrlich, L Goerigk, Effect of the damping function in dispersion corrected density functional theory. *J. Comput. Chem*, **2011**, 32, 1456–1465.
16. S. Grimme, J. Antony, S. Ehrlich, H Krieg, A consistent and accurate ab initio parametrization of density functional dispersion correction (DFT-D) for the 94 elements H-Pu. *J. Chem. Phys.* **2010**, 132, 154104.
17. M. Swart, M. Güell, J. M. Luis, M Solà, Spin-state corrected Gaussian-type orbital basis sets, *J. Phys. Chem. A*, **2010**, 114, 7191–7197.
18. F. Weigend, R Ahlrichs, Balanced basis sets of split valence, triple zeta valence and quadruple zeta valence quality for H to Rn: Design and assessment of accuracy. *Phys. Chem. Chem. Phys.* **2005**, 7, 3297–3305.
19. Y. Wang, A. Kostenko, T. J. Hadlington, M-P. Luecke, S. Yao, M. Driess, Silicon-Mediated Selective Homo- and Heterocoupling of Carbon Monoxide. *J. Am. Chem. Soc.* **2019**, 141, 626–634
20. J. Tomasi, B. Mennucci, R. Cammi, Quantum mechanical continuum solvation models. *Chem. Rev.* **2005**, 105, 2999–3094.
21. M. J. Frisch, *Gaussian 16, Revision A.03*; Gaussian, Inc.: Wallingford CT, **2016**.
